# Supplementary material for: Individual Amino Acid Supplementation Can Improve Energy Metabolism and Decrease ROS Production in Neuronal Cells Overexpressing Alpha-Synuclein
Source: Springer Nature journal article supplement (doi:10.1007/s12017-017-8448-8), 2017-06-15
Supplement: MOESM2 [file 12447912]

## Sheet: Sheet1
Protein IDs	Protein names	Gene names	Fasta headers	Ratio H/L normalized	Ratio H/L count	Ratio H/L normalized rep 1	Ratio H/L normalized rep 2	Ratio H/L normalized rep 3	Rep 1 (1/x)	Rep 1 Sig A	Rep 2 (1/x)	Rep 2 Sig A	Rep 3(1/x)	Rep 3 Sig A	Count	Median Ratio
P29373;Q5SYZ4	Cellular retinoic acid-binding protein 2	CRABP2	>sp|P29373|RABP2_HUMAN Cellular retinoic acid-binding protein 2 OS=Homo sapiens GN=CRABP2 PE=1 SV=2;>tr|Q5SYZ4|Q5SYZ4_HUMAN Cellular retinoic acid-binding protein 2 (Fragment) OS=Homo sapiens GN=CRABP2 PE=1 SV=1	0.14101	19	0.12796	0.13875	0.14811	7.81494	+	7.20721	+	6.75174	+	3	7.20721
P04264;H6VRG3;H6VRG0;H6VRF9;H6VRF8;H6VRG1;CON__P04264;CON__ENSEMBL:ENSBTAP00000038253	Keratin, type II cytoskeletal 1	KRT1	>sp|P04264|K2C1_HUMAN Keratin, type II cytoskeletal 1 OS=Homo sapiens GN=KRT1 PE=1 SV=6;>tr|H6VRG3|H6VRG3_HUMAN Keratin 1 OS=Homo sapiens GN=KRT1 PE=3 SV=1;>tr|H6VRG0|H6VRG0_HUMAN Keratin 1 OS=Homo sapiens GN=KRT1 PE=3 SV=1;>tr|H6VRF9|H6VRF9_HUMAN Keratin	0.14478	18	0.44465	0.13415	0.10804	2.24896	+	7.45434	+	9.25583	+	3	7.45434
P13645;CON__P13645;CON__P02535-1;Q7Z3Y7;CON__Q148H6;CON__Q7Z3Y7;B4DWU0;K7EMD9;B4E2P9;B4E2J5;C9JM50;K7EPJ9;B4E204;P13646-2;I6L965;F8VZY9;Q14525;CON__Q14525;Q6A165;Q15323;CON__Q9UE12;CON__Q15323;CON__A2A5Y0;O76013-2;CON__P05784;CON__Q92764;C4AM86;P05783;B2RA03;A0A024RAY2;Q14532;CON__Q14532;O76014;CON__A2AB72;Q92764;CON__Q497I4;A0A024R1T2;O76015;CON__O76015;Q7Z3Y8;CON__Q7Z3Y8;O76013;CON__O76013;CON_…	Keratin, type I cytoskeletal 10	KRT10	>sp|P13645|K1C10_HUMAN Keratin, type I cytoskeletal 10 OS=Homo sapiens GN=KRT10 PE=1 SV=6;>P13645 SWISS-PROT:P13645 Tax_Id=9606 Gene_Symbol=KRT10 Keratin, type I cytoskeletal 10	0.15144	29	0.24252	0.11336	0.094617	4.12337	+	8.82145	+	10.5689	+	3	8.82145
Q6DEN2;Q14195-2;Q8IXW6;Q14195;H0YBT4;D6RF19	Dihydropyrimidinase-related protein 3	DPYSL3	>tr|Q6DEN2|Q6DEN2_HUMAN DPYSL3 protein OS=Homo sapiens GN=DPYSL3 PE=2 SV=1;>sp|Q14195-2|DPYL3_HUMAN Isoform LCRMP-4 of Dihydropyrimidinase-related protein 3 OS=Homo sapiens GN=DPYSL3;>tr|Q8IXW6|Q8IXW6_HUMAN Dihydropyrimidinase-like 3 OS=Homo sapiens GN=DPY	0.26341	21	0.25245	0.26341	0.3719	3.96118	+	3.79636	+	2.68889	+	3	3.79636
Q4G1C4;Q8N4Q0;Q8N4Q0-2	Zinc-binding alcohol dehydrogenase domain-containing protein 2	ZADH2	>tr|Q4G1C4|Q4G1C4_HUMAN ZADH2 protein (Fragment) OS=Homo sapiens GN=ZADH2 PE=2 SV=1;>sp|Q8N4Q0|ZADH2_HUMAN Zinc-binding alcohol dehydrogenase domain-containing protein 2 OS=Homo sapiens GN=ZADH2 PE=1 SV=1;>sp|Q8N4Q0-2|ZADH2_HUMAN Isoform 2 of Zinc-binding	0.27533	3	0.21428	0.35003	0.28286	4.66679	+	2.8569	+	3.53532	+	3	3.53532
F8WE53;F8WAH1;Q9UDR5;A4D0W4	Alpha-aminoadipic semialdehyde synthase, mitochondrial;Lysine ketoglutarate reductase;Saccharopine dehydrogenase	AASS	>tr|F8WE53|F8WE53_HUMAN Lysine ketoglutarate reductase OS=Homo sapiens GN=AASS PE=1 SV=1;>tr|F8WAH1|F8WAH1_HUMAN Lysine ketoglutarate reductase OS=Homo sapiens GN=AASS PE=1 SV=1;>sp|Q9UDR5|AASS_HUMAN Alpha-aminoadipic semialdehyde synthase, mitochondrial O	0.36867	4	0.4172	0.44088	0.32889	2.39693	+	2.26819	+	3.04053	+	3	2.39693
P21397-2;Q53YE7;Q53EZ0;Q49A63;P21397;Q5ULA3;B7Z5H3;B7Z242;Q8TBI1;P27338	Amine oxidase [flavin-containing] A	MAOA	>sp|P21397-2|AOFA_HUMAN Isoform 2 of Amine oxidase [flavin-containing] A OS=Homo sapiens GN=MAOA;>tr|Q53YE7|Q53YE7_HUMAN Monoamine oxidase A OS=Homo sapiens GN=MAOA PE=2 SV=1;>tr|Q53EZ0|Q53EZ0_HUMAN Monoamine oxidase A variant (Fragment) OS=Homo sapiens PE	0.43356	6	0.64858	0.32076	0.60855	1.54183	+	3.1176	+	1.64325	+	3	1.64325
O43347;B3KN16	RNA-binding protein Musashi homolog 1	MSI1	>sp|O43347|MSI1H_HUMAN RNA-binding protein Musashi homolog 1 OS=Homo sapiens GN=MSI1 PE=1 SV=1;>tr|B3KN16|B3KN16_HUMAN cDNA FLJ13200 fis, clone NT2RP3004490, highly similar to RNA-binding protein Musashi homolog 1 OS=Homo sapiens PE=2 SV=1	0.44242	7	0.49284	0.44242	0.52552	2.02906	+	2.2603	+	1.90288	+	3	2.02906
P22466	Galanin peptides;Galanin;Galanin message-associated peptide	GAL	>sp|P22466|GALA_HUMAN Galanin peptides OS=Homo sapiens GN=GAL PE=1 SV=3	0.44245	7	0.43708	0.45508	0.52404	2.28791	+	2.19742	+	1.90825	+	3	2.19742
Q96T92	Insulinoma-associated protein 2	INSM2	>sp|Q96T92|INSM2_HUMAN Insulinoma-associated protein 2 OS=Homo sapiens GN=INSM2 PE=1 SV=3	0.46521	4	0.54454	0.40817	0.46503	1.83641	+	2.44996	+	2.1504	+	3	2.1504
P07196;B3KQI5;B3KXJ0;Q8TCR7;B4DR43;I6L9F6	Neurofilament light polypeptide	NEFL;DKFZp761K0922	>sp|P07196|NFL_HUMAN Neurofilament light polypeptide OS=Homo sapiens GN=NEFL PE=1 SV=3;>tr|B3KQI5|B3KQI5_HUMAN cDNA FLJ90522 fis, clone NT2RP4000108, highly similar to Neurofilament triplet L protein OS=Homo sapiens PE=2 SV=1;>tr|B3KXJ0|B3KXJ0_HUMAN cDNA F	0.46524	6	0.59578	0.75384	0.45734	1.67847	+	1.32654	+	2.18656	+	3	1.67847
Q9ULP0-3;A0A024R6V8;B7Z9X4;B3KX54;Q9ULP0-4;Q9ULP0-2;Q9ULP0;Q9ULP0-8;Q9ULP0-5;Q9ULP0-7;Q9ULP0-6;H3BNB4;H3BPT6;H3BPH8;H3BRT9;H3BN53;H3BMR6;H3BR92;H3BNQ1;H3BPQ3;H3BN97;H3BNK4;H3BM40;H3BQJ4	Protein NDRG4	NDRG4	>sp|Q9ULP0-3|NDRG4_HUMAN Isoform 3 of Protein NDRG4 OS=Homo sapiens GN=NDRG4;>tr|A0A024R6V8|A0A024R6V8_HUMAN NDRG family member 4, isoform CRA_b OS=Homo sapiens GN=NDRG4 PE=4 SV=1;>tr|B7Z9X4|B7Z9X4_HUMAN Protein NDRG4 OS=Homo sapiens GN=NDRG4 PE=2 SV=1;>tr	0.48192	6	0.53545	0.40824	0.56064	1.86759	+	2.44954	+	1.78368	+	3	1.86759
Q9Y679-3;Q68CX8;Q9Y679-2;A8KAQ6;B4E3W1;Q9Y679	Ancient ubiquitous protein 1	AUP1;DKFZp686P12272	>sp|Q9Y679-3|AUP1_HUMAN Isoform 3 of Ancient ubiquitous protein 1 OS=Homo sapiens GN=AUP1;>tr|Q68CX8|Q68CX8_HUMAN Putative uncharacterized protein DKFZp686P12272 OS=Homo sapiens GN=DKFZp686P12272 PE=4 SV=2;>sp|Q9Y679-2|AUP1_HUMAN Isoform Short of Ancient u	0.54763	9	0.58841	0.54763	0.40977	1.6995	+	1.82605	+	2.44039	+	3	1.82605
P00750-3;B4DRD3;P00750;B8ZX62;P00750-4;B4DNJ1;B4DN26;E7ESF4;B4DV92;Q6LBF5;H0YBH9;Q5HYM8;E5RHG4;E5RGA1;P00750-2;K4DI88	Tissue-type plasminogen activator;Tissue-type plasminogen activator chain A;Tissue-type plasminogen activator chain B	PLAT	>sp|P00750-3|TPA_HUMAN Isoform 3 of Tissue-type plasminogen activator OS=Homo sapiens GN=PLAT;>tr|B4DRD3|B4DRD3_HUMAN cDNA FLJ58123, highly similar to Tissue-type plasminogen activator (EC 3.4.21.68) OS=Homo sapiens PE=2 SV=1;>sp|P00750|TPA_HUMAN Tissue-ty	0.55838	6	0.37435	0.59538	0.61433	2.6713	+	1.6796	+	1.62779	+	3	1.6796
Q9UI15;Q7Z517;C9J5W6;H7C5N2;C9JCX3	Transgelin-3	TAGLN3	>sp|Q9UI15|TAGL3_HUMAN Transgelin-3 OS=Homo sapiens GN=TAGLN3 PE=1 SV=2;>tr|Q7Z517|Q7Z517_HUMAN Neuronal protein NP25 OS=Homo sapiens PE=2 SV=1;>tr|C9J5W6|C9J5W6_HUMAN Transgelin-3 OS=Homo sapiens GN=TAGLN3 PE=4 SV=1	0.58128	10	0.56651	0.64525	0.64061	1.76519	+	1.54979	+	1.56101	+	3	1.56101
E7ESP9;A5YM63;P07197;E7EMV2;B4DJT7;P07197-2;Q9UK51	Neurofilament medium polypeptide	NEFM	>tr|E7ESP9|E7ESP9_HUMAN Neurofilament medium polypeptide OS=Homo sapiens GN=NEFM PE=1 SV=1;>tr|A5YM63|A5YM63_HUMAN NEFM protein OS=Homo sapiens GN=NEFM PE=2 SV=1;>sp|P07197|NFM_HUMAN Neurofilament medium polypeptide OS=Homo sapiens GN=NEFM PE=1 SV=3;>tr|E7	0.6107	33	0.61681	0.60983	0.58285	1.62124	+	1.6398	+	1.71571	+	3	1.6398
Q7L266;B3KR33;A0A024R573;E9PJK6	Isoaspartyl peptidase/L-asparaginase;Isoaspartyl peptidase/L-asparaginase alpha chain;Isoaspartyl peptidase/L-asparaginase beta chain	ASRGL1	>sp|Q7L266|ASGL1_HUMAN Isoaspartyl peptidase/L-asparaginase OS=Homo sapiens GN=ASRGL1 PE=1 SV=2;>tr|B3KR33|B3KR33_HUMAN cDNA FLJ33589 fis, clone BRAMY2012536, highly similar to Homo sapiens asparaginase like 1 (ASRGL1), mRNA OS=Homo sapiens PE=2 SV=1;>tr|A	0.63706	5	0.59666	0.67303	0.67961	1.676	+	1.48582	+	1.47143	+	3	1.48582
P05060;B2R5M3;B4DEA7	Secretogranin-1;GAWK peptide;CCB peptide	CHGB	>sp|P05060|SCG1_HUMAN Secretogranin-1 OS=Homo sapiens GN=CHGB PE=1 SV=2;>tr|B2R5M3|B2R5M3_HUMAN cDNA, FLJ92530, highly similar to Homo sapiens chromogranin B (secretogranin 1) (CHGB), mRNA OS=Homo sapiens PE=2 SV=1;>tr|B4DEA7|B4DEA7_HUMAN cDNA FLJ58131, hi	0.64512	9	0.66773	0.63882	0.51735	1.49761	+	1.56539	+	1.93293	+	3	1.56539
V9HWJ7;Q53FI1;P13796;A0A024RDT4;Q59GX5;Q5TBN3;B4DUA0;B3KUI1;Q5TBN5	Plastin-2	LCP1	>tr|V9HWJ7|V9HWJ7_HUMAN Epididymis secretory protein Li 37 OS=Homo sapiens GN=HEL-S-37 PE=2 SV=1;>tr|Q53FI1|Q53FI1_HUMAN L-plastin variant (Fragment) OS=Homo sapiens PE=2 SV=1;>sp|P13796|PLSL_HUMAN Plastin-2 OS=Homo sapiens GN=LCP1 PE=1 SV=6;>tr|A0A024RDT4	0.65484	31	0.51879	0.56461	0.73278	1.92756	+	1.77113	+	1.36467	+	3	1.77113
Q15059;A0A024R8H6;Q15059-2;B4DS09;A9J571	Bromodomain-containing protein 3	BRD3	>sp|Q15059|BRD3_HUMAN Bromodomain-containing protein 3 OS=Homo sapiens GN=BRD3 PE=1 SV=1;>tr|A0A024R8H6|A0A024R8H6_HUMAN Bromodomain containing 3, isoform CRA_a OS=Homo sapiens GN=BRD3 PE=4 SV=1;>sp|Q15059-2|BRD3_HUMAN Isoform 2 of Bromodomain-containing p	0.65777	9	0.6746	0.75949	0.62263	1.48236	+	1.31667	+	1.60609	+	3	1.48236
Q9BW72;A0A024R7Q3	HIG1 domain family member 2A, mitochondrial	HIGD2A	>sp|Q9BW72|HIG2A_HUMAN HIG1 domain family member 2A, mitochondrial OS=Homo sapiens GN=HIGD2A PE=1 SV=1;>tr|A0A024R7Q3|A0A024R7Q3_HUMAN HIG1 domain family, member 2A, isoform CRA_a OS=Homo sapiens GN=HIGD2A PE=4 SV=1	0.66396	4	0.6201	0.69409	0.37527	1.61264	+	1.44074	+	2.66475	+	3	1.61264
P60880-2;P60880	Synaptosomal-associated protein 25	SNAP25	>sp|P60880-2|SNP25_HUMAN Isoform 2 of Synaptosomal-associated protein 25 OS=Homo sapiens GN=SNAP25;>sp|P60880|SNP25_HUMAN Synaptosomal-associated protein 25 OS=Homo sapiens GN=SNAP25 PE=1 SV=1	0.66585	9	0.58393	0.73257	0.66585	1.71253	+	1.36506	+	1.50184	+	3	1.50184
B4DIH2;Q8TB36-2;Q8TB36	Ganglioside-induced differentiation-associated protein 1	GDAP1	>tr|B4DIH2|B4DIH2_HUMAN cDNA FLJ60563, highly similar to Ganglioside-induceddifferentiation-associated protein 1 OS=Homo sapiens PE=2 SV=1;>sp|Q8TB36-2|GDAP1_HUMAN Isoform 2 of Ganglioside-induced differentiation-associated protein 1 OS=Homo sapiens GN=GDA	0.67102	10	0.67317	0.67365	0.66888	1.48551	+	1.48445	+	1.49504	+	3	1.48551
Q8WUK0-2;B4DGK8;Q8WUK0-3;E9PQM0;Q8WUK0	Phosphatidylglycerophosphatase and protein-tyrosine phosphatase 1	PTPMT1	>sp|Q8WUK0-2|PTPM1_HUMAN Isoform 2 of Phosphatidylglycerophosphatase and protein-tyrosine phosphatase 1 OS=Homo sapiens GN=PTPMT1;>tr|B4DGK8|B4DGK8_HUMAN cDNA FLJ57723, moderately similar to Protein-tyrosine phosphatase mitochondrial 1, mitochondrial (EC 3	0.67216	5	0.70984	0.76055	0.66264	1.40877	+	1.31484	+	1.50912	+	3	1.40877
P46013;P46013-2;Q70L74	Antigen KI-67	MKI67	>sp|P46013|KI67_HUMAN Antigen KI-67 OS=Homo sapiens GN=MKI67 PE=1 SV=2;>sp|P46013-2|KI67_HUMAN Isoform Short of Antigen KI-67 OS=Homo sapiens GN=MKI67	0.68449	17	0.70088	0.66339	0.66552	1.42678	+	1.50741	+	1.50258	+	3	1.50258
Q00653-4;Q00653;M0R119;D3DR86;Q00653-3	Nuclear factor NF-kappa-B p100 subunit;Nuclear factor NF-kappa-B p52 subunit	NFKB2	>sp|Q00653-4|NFKB2_HUMAN Isoform 4 of Nuclear factor NF-kappa-B p100 subunit OS=Homo sapiens GN=NFKB2;>sp|Q00653|NFKB2_HUMAN Nuclear factor NF-kappa-B p100 subunit OS=Homo sapiens GN=NFKB2 PE=1 SV=4	0.68649	13	0.69529	0.66208	0.70875	1.43825	+	1.51039	+	1.41093	+	3	1.43825
B4DE96;P51809-3;B4DIH9;P51809;A0A024R061;B4DMB4;B2R6P4;P51809-2;A0A024R074	Vesicle-associated membrane protein 7	VAMP7;SYBL1	>tr|B4DE96|B4DE96_HUMAN cDNA FLJ53762, highly similar to Synaptobrevin-like protein 1 OS=Homo sapiens PE=2 SV=1;>sp|P51809-3|VAMP7_HUMAN Isoform 3 of Vesicle-associated membrane protein 7 OS=Homo sapiens GN=VAMP7;>tr|B4DIH9|B4DIH9_HUMAN cDNA FLJ53045, high	0.68685	7	0.58481	0.68685	0.56461	1.70996	+	1.45592	+	1.77113	+	3	1.70996
Q00534;Q8NI11	Cyclin-dependent kinase 6	CDK6	>sp|Q00534|CDK6_HUMAN Cyclin-dependent kinase 6 OS=Homo sapiens GN=CDK6 PE=1 SV=1	0.68905	22	0.7163	0.62923	0.67266	1.39606	+	1.58924	+	1.48664	+	3	1.48664
O95168-2;O95168;F2Z3P9;C9JXQ9	NADH dehydrogenase [ubiquinone] 1 beta subcomplex subunit 4	NDUFB4	>sp|O95168-2|NDUB4_HUMAN Isoform 2 of NADH dehydrogenase [ubiquinone] 1 beta subcomplex subunit 4 OS=Homo sapiens GN=NDUFB4;>sp|O95168|NDUB4_HUMAN NADH dehydrogenase [ubiquinone] 1 beta subcomplex subunit 4 OS=Homo sapiens GN=NDUFB4 PE=1 SV=3;>tr|F2Z3P9|F2	0.68917	5	0.60342	0.67104	0.54513	1.65722	+	1.49022	+	1.83442	+	3	1.65722
P09455;H0YAK8;P09455-2;P09455-3	Retinol-binding protein 1	RBP1	>sp|P09455|RET1_HUMAN Retinol-binding protein 1 OS=Homo sapiens GN=RBP1 PE=1 SV=2;>tr|H0YAK8|H0YAK8_HUMAN Retinol-binding protein 1 (Fragment) OS=Homo sapiens GN=RBP1 PE=1 SV=1;>sp|P09455-2|RET1_HUMAN Isoform 2 of Retinol-binding protein 1 OS=Homo sapiens	0.69591	46	0.66883	0.71708	0.72613	1.49515	+	1.39454	+	1.37716	+	3	1.39454
P04181;Q59HE2;P04181-2	Ornithine aminotransferase, mitochondrial;Ornithine aminotransferase, hepatic form;Ornithine aminotransferase, renal form	OAT	>sp|P04181|OAT_HUMAN Ornithine aminotransferase, mitochondrial OS=Homo sapiens GN=OAT PE=1 SV=1;>tr|Q59HE2|Q59HE2_HUMAN Ornithine aminotransferase variant (Fragment) OS=Homo sapiens PE=2 SV=1;>sp|P04181-2|OAT_HUMAN Isoform 2 of Ornithine aminotransferase,	0.69705	20	0.5958	0.69175	0.71923	1.67842	+	1.44561	+	1.39038	+	3	1.44561
Q86TG7-2;B4DSP0;Q86TG7	Retrotransposon-derived protein PEG10	PEG10;hCG_1642748	>sp|Q86TG7-2|PEG10_HUMAN Isoform RF1 of Retrotransposon-derived protein PEG10 OS=Homo sapiens GN=PEG10;>tr|B4DSP0|B4DSP0_HUMAN HCG1642748, isoform CRA_b OS=Homo sapiens GN=hCG_1642748 PE=2 SV=1;>sp|Q86TG7|PEG10_HUMAN Retrotransposon-derived protein PEG10 O	0.6994	7	0.53558	0.69926	0.68396	1.86713	+	1.43008	+	1.46207	+	3	1.46207
A0A024R972;P11047;Q6NVY8	Laminin subunit gamma-1	LAMC1	>tr|A0A024R972|A0A024R972_HUMAN Laminin, gamma 1 (Formerly LAMB2), isoform CRA_a OS=Homo sapiens GN=LAMC1 PE=4 SV=1;>sp|P11047|LAMC1_HUMAN Laminin subunit gamma-1 OS=Homo sapiens GN=LAMC1 PE=1 SV=3	0.70607	20	0.72586	0.7053	0.68807	1.37768	+	1.41784	+	1.45334	+	3	1.41784
P59768;G3V3J9;G3V2N0;G3V2C9;G3V415	Guanine nucleotide-binding protein G(I)/G(S)/G(O) subunit gamma-2;Guanine nucleotide-binding protein subunit gamma	GNG2	>sp|P59768|GBG2_HUMAN Guanine nucleotide-binding protein G(I)/G(S)/G(O) subunit gamma-2 OS=Homo sapiens GN=GNG2 PE=1 SV=2;>tr|G3V3J9|G3V3J9_HUMAN Guanine nucleotide-binding protein subunit gamma OS=Homo sapiens GN=GNG2 PE=1 SV=1;>tr|G3V2N0|G3V2N0_HUMAN Gua	0.7087	10	0.6847	0.73797	0.7179	1.46049	+	1.35507	+	1.39295	+	3	1.39295
P12532;P12532-2;C9JSQ1;F8WCN3;C9J8F6;B4DKA2;B4DFE8;C9JJX8;C9J995;B4DGR9;E9PCP8;B4DH34;B3KVA7;B4DEL4;B4DFA3;J3KQ93;B4DF72;C9J6W7;C9JT96;B4DF55;B7Z9T7;B4DJW9	Creatine kinase U-type, mitochondrial	CKMT1A;CKMT1B	>sp|P12532|KCRU_HUMAN Creatine kinase U-type, mitochondrial OS=Homo sapiens GN=CKMT1A PE=1 SV=1;>sp|P12532-2|KCRU_HUMAN Isoform 2 of Creatine kinase U-type, mitochondrial OS=Homo sapiens GN=CKMT1A;>tr|C9JSQ1|C9JSQ1_HUMAN Creatine kinase U-type, mitochondri	0.71271	20	0.70605	0.74936	0.71457	1.41633	+	1.33447	+	1.39944	+	3	1.39944
Q2TSD2;Q01085;Q01085-2;B4DHS3;Q59G49;Q49AS9;O15187;A8K5C4;E7ETJ9	Nucleolysin TIAR	TIAL1	>tr|Q2TSD2|Q2TSD2_HUMAN Aging-associated gene 7 protein OS=Homo sapiens PE=2 SV=1;>sp|Q01085|TIAR_HUMAN Nucleolysin TIAR OS=Homo sapiens GN=TIAL1 PE=1 SV=1;>sp|Q01085-2|TIAR_HUMAN Isoform 2 of Nucleolysin TIAR OS=Homo sapiens GN=TIAL1;>tr|B4DHS3|B4DHS3_HUM	0.72784	7	1.4693	0.72784	0.57559	0.680596	+	1.37393	+	1.73735	+	3	1.37393
Q59GC9;B7Z2V7;B7Z1V5;Q68CM6;P61764;P61764-2;B7Z3F4	Syntaxin-binding protein 1	stxbp1;STXBP1	>tr|Q59GC9|Q59GC9_HUMAN Syntaxin binding protein 1 variant (Fragment) OS=Homo sapiens PE=2 SV=1;>tr|B7Z2V7|B7Z2V7_HUMAN cDNA FLJ54602, highly similar to Syntaxin-binding protein 1 OS=Homo sapiens PE=2 SV=1;>tr|B7Z1V5|B7Z1V5_HUMAN cDNA FLJ55678, highly simi	0.74735	30	0.74661	0.76187	0.74057	1.33939	+	1.31256	+	1.35031	+	3	1.33939
Q9BW92	Threonine--tRNA ligase, mitochondrial	TARS2	>sp|Q9BW92|SYTM_HUMAN Threonine--tRNA ligase, mitochondrial OS=Homo sapiens GN=TARS2 PE=1 SV=1	0.89674	5	0.72368	0.6349	1.4585	1.38183	+	1.57505	+	0.685636	+	3	1.38183
Q96F85-2;B8ZZB8;Q96F85	CB1 cannabinoid receptor-interacting protein 1	CNRIP1	>sp|Q96F85-2|CNRP1_HUMAN Isoform 2 of CB1 cannabinoid receptor-interacting protein 1 OS=Homo sapiens GN=CNRIP1;>tr|B8ZZB8|B8ZZB8_HUMAN CB1 cannabinoid receptor-interacting protein 1 OS=Homo sapiens GN=CNRIP1 PE=1 SV=1;>sp|Q96F85|CNRP1_HUMAN CB1 cannabinoid	0.92978	3	1.3774	1.5326	1.3711	0.726006	+	0.652486	+	0.729341	+	3	0.726006
Q9NRX2;E9PKV2	39S ribosomal protein L17, mitochondrial	MRPL17	>sp|Q9NRX2|RM17_HUMAN 39S ribosomal protein L17, mitochondrial OS=Homo sapiens GN=MRPL17 PE=1 SV=1;>tr|E9PKV2|E9PKV2_HUMAN 39S ribosomal protein L17, mitochondrial (Fragment) OS=Homo sapiens GN=MRPL17 PE=1 SV=1	1.0053	3	3.4467	3.2218	0.67413	0.290133	+	0.310385	+	1.48339	+	3	0.310385
J3KNN7;Q7Z569;A8K2W4;Q59H81;Q7Z569-2	BRCA1-associated protein	BRAP	>tr|J3KNN7|J3KNN7_HUMAN BRCA1-associated protein OS=Homo sapiens GN=BRAP PE=1 SV=1;>sp|Q7Z569|BRAP_HUMAN BRCA1-associated protein OS=Homo sapiens GN=BRAP PE=1 SV=2;>tr|A8K2W4|A8K2W4_HUMAN cDNA FLJ76247, highly similar to Homo sapiens BRCA1 associated prote	1.1053	4	0.6016	0.56079	0.68665	1.66223	+	1.7832	+	1.45635	+	3	1.66223
H3BR23;O95273-2;O95273;H3BQA6	Cyclin-D1-binding protein 1	CCNDBP1	>tr|H3BR23|H3BR23_HUMAN Cyclin-D1-binding protein 1 OS=Homo sapiens GN=CCNDBP1 PE=1 SV=1;>sp|O95273-2|CCDB1_HUMAN Isoform 2 of Cyclin-D1-binding protein 1 OS=Homo sapiens GN=CCNDBP1;>sp|O95273|CCDB1_HUMAN Cyclin-D1-binding protein 1 OS=Homo sapiens GN=CCND	1.3174	6	1.599	1.3454	1.6747	0.625391	+	0.743273	+	0.597122	+	3	0.625391
Q9Y490;Q5TCU6	Talin-1	TLN1	>sp|Q9Y490|TLN1_HUMAN Talin-1 OS=Homo sapiens GN=TLN1 PE=1 SV=3;>tr|Q5TCU6|Q5TCU6_HUMAN Talin-1 OS=Homo sapiens GN=TLN1 PE=1 SV=1	1.3696	167	1.3875	1.3609	1.3727	0.720721	+	0.734808	+	0.728491	+	3	0.728491
Q5T6L4;P00966;A8KAP9;Q5T6L6;Q5T6L5;B4E395;Q5T6L7	Argininosuccinate synthase	ASS;ASS1	>tr|Q5T6L4|Q5T6L4_HUMAN Argininosuccinate synthetase, isoform CRA_a OS=Homo sapiens GN=ASS PE=2 SV=1;>sp|P00966|ASSY_HUMAN Argininosuccinate synthase OS=Homo sapiens GN=ASS1 PE=1 SV=2;>tr|A8KAP9|A8KAP9_HUMAN cDNA FLJ78448, highly similar to Homo sapiens ar	1.3803	62	1.3916	1.3645	1.3849	0.718597	+	0.732869	+	0.722074	+	3	0.722074
Q9NZZ3;Q9NZZ3-2	Charged multivesicular body protein 5	CHMP5	>sp|Q9NZZ3|CHMP5_HUMAN Charged multivesicular body protein 5 OS=Homo sapiens GN=CHMP5 PE=1 SV=1;>sp|Q9NZZ3-2|CHMP5_HUMAN Isoform 2 of Charged multivesicular body protein 5 OS=Homo sapiens GN=CHMP5	1.3877	10	1.3661	1.3211	1.5957	0.732011	+	0.756945	+	0.626684	+	3	0.732011
P07948-2;P07948;A8K379;Q6NUK7;B4DQ79;P08631-3;P08631-2;A8K4G3;P08631-4;H0Y3C5;P08631;J3KPD6;E5RJ37	Tyrosine-protein kinase Lyn;Tyrosine-protein kinase HCK	LYN;HCK	>sp|P07948-2|LYN_HUMAN Isoform 2 of Tyrosine-protein kinase Lyn OS=Homo sapiens GN=LYN;>sp|P07948|LYN_HUMAN Tyrosine-protein kinase Lyn OS=Homo sapiens GN=LYN PE=1 SV=3;>tr|A8K379|A8K379_HUMAN cDNA FLJ75641, highly similar to Homo sapiens v-yes-1 Yamaguchi	1.4319	7	1.419	1.5182	1.4319	0.704722	+	0.658675	+	0.698373	+	3	0.698373
Q9Y4G6;H0YMT1;G1UI21;H0YN01	Talin-2	TLN2	>sp|Q9Y4G6|TLN2_HUMAN Talin-2 OS=Homo sapiens GN=TLN2 PE=1 SV=4;>tr|H0YMT1|H0YMT1_HUMAN Talin-2 (Fragment) OS=Homo sapiens GN=TLN2 PE=1 SV=1;>tr|G1UI21|G1UI21_HUMAN Talin-2 OS=Homo sapiens GN=TLN2 PE=2 SV=1	1.439	15	1.4411	1.3495	1.5126	0.693914	+	0.741015	+	0.661113	+	3	0.693914
Q96CN7;D6RGE2;Q9Y3B5	Isochorismatase domain-containing protein 1	ISOC1	>sp|Q96CN7|ISOC1_HUMAN Isochorismatase domain-containing protein 1 OS=Homo sapiens GN=ISOC1 PE=1 SV=3;>tr|D6RGE2|D6RGE2_HUMAN Isochorismatase domain-containing protein 1 (Fragment) OS=Homo sapiens GN=ISOC1 PE=1 SV=1;>tr|Q9Y3B5|Q9Y3B5_HUMAN CGI-111 protein	1.4404	46	1.4407	1.4733	1.3814	0.694107	+	0.678748	+	0.723903	+	3	0.694107
P49023-2;P49023;P49023-3;F5GZ78;B3KVL0;B4DRY6;P49023-4;Q59GS5;B4DNT9;Q9BTK0;F5H836;Q6ZQU7;E7EMK8	Paxillin	PXN	>sp|P49023-2|PAXI_HUMAN Isoform Alpha of Paxillin OS=Homo sapiens GN=PXN;>sp|P49023|PAXI_HUMAN Paxillin OS=Homo sapiens GN=PXN PE=1 SV=3;>sp|P49023-3|PAXI_HUMAN Isoform Gamma of Paxillin OS=Homo sapiens GN=PXN;>tr|F5GZ78|F5GZ78_HUMAN Paxillin OS=Homo sapie	1.4514	8	1.4859	1.3246	1.3663	0.672993	+	0.754945	+	0.731904	+	3	0.731904
P01344;A8K6C9;P01344-2;P01344-3;E3UN46	Insulin-like growth factor II;Insulin-like growth factor II;Insulin-like growth factor II Ala-25 Del;Preptin	IGF2	>sp|P01344|IGF2_HUMAN Insulin-like growth factor II OS=Homo sapiens GN=IGF2 PE=1 SV=1;>tr|A8K6C9|A8K6C9_HUMAN cDNA FLJ78037, highly similar to Homo sapiens insulin-like growth factor 2 (somatomedin A), mRNA OS=Homo sapiens PE=2 SV=1;>sp|P01344-2|IGF2_HUMAN	1.4845	4	1.6974	1.6455	1.8887	0.589136	+	0.607718	+	0.529465	+	3	0.589136
Q2XPP3;S4R3Z2;P42330-2	Aldo-keto reductase family 1 member C3	AKR1C3	>tr|Q2XPP3|Q2XPP3_HUMAN Type II 3a-hydroxysteroid dehydrogenase variant OS=Homo sapiens PE=2 SV=1;>tr|S4R3Z2|S4R3Z2_HUMAN Aldo-keto reductase family 1 member C3 OS=Homo sapiens GN=AKR1C3 PE=1 SV=1;>sp|P42330-2|AK1C3_HUMAN Isoform 2 of Aldo-keto reductase f	1.5109	14	1.4828	1.5309	1.4178	0.6744	+	0.653211	+	0.705318	+	3	0.6744
A8K128;Q96EB6-2;Q96EB6;A0A024QZQ1;B0QZ35;E9PC49;B3KNK3;I1Y8W7	NAD-dependent protein deacetylase sirtuin-1;SirtT1 75 kDa fragment	SIRT1	>tr|A8K128|A8K128_HUMAN cDNA FLJ76335, highly similar to Homo sapiens sirtuin (silent mating type information regulation 2 homolog) 1 (S. cerevisiae), mRNA OS=Homo sapiens PE=2 SV=1;>sp|Q96EB6-2|SIR1_HUMAN Isoform 2 of NAD-dependent protein deacetylase sir	1.528	5	1.4939	1.3862	1.7336	0.669389	+	0.721397	+	0.576834	+	3	0.669389
Q02952-3;Q02952-2;Q02952;Q86TJ9	A-kinase anchor protein 12	AKAP12	>sp|Q02952-3|AKA12_HUMAN Isoform 3 of A-kinase anchor protein 12 OS=Homo sapiens GN=AKAP12;>sp|Q02952-2|AKA12_HUMAN Isoform 2 of A-kinase anchor protein 12 OS=Homo sapiens GN=AKAP12;>sp|Q02952|AKA12_HUMAN A-kinase anchor protein 12 OS=Homo sapiens GN=AKAP1	1.5309	78	1.5058	1.5463	1.5486	0.664099	+	0.646705	+	0.645745	+	3	0.646705
P48449-2;P48449-3;P48449;B2R694	Lanosterol synthase	LSS	>sp|P48449-2|ERG7_HUMAN Isoform 2 of Lanosterol synthase OS=Homo sapiens GN=LSS;>sp|P48449-3|ERG7_HUMAN Isoform 3 of Lanosterol synthase OS=Homo sapiens GN=LSS;>sp|P48449|ERG7_HUMAN Lanosterol synthase OS=Homo sapiens GN=LSS PE=1 SV=1;>tr|B2R694|B2R694_HUM	1.547	8	1.8933	1.5986	1.365	0.528178	+	0.625547	+	0.732601	+	3	0.625547
Q9Y263;E5RIM3;H0YBW4;H0YAU9;H0YC16	Phospholipase A-2-activating protein	PLAA	>sp|Q9Y263|PLAP_HUMAN Phospholipase A-2-activating protein OS=Homo sapiens GN=PLAA PE=1 SV=2;>tr|E5RIM3|E5RIM3_HUMAN Phospholipase A-2-activating protein OS=Homo sapiens GN=PLAA PE=1 SV=1;>tr|H0YBW4|H0YBW4_HUMAN Phospholipase A-2-activating protein (Fragme	1.5519	29	1.5181	1.4415	1.6532	0.658718	+	0.693722	+	0.604887	+	3	0.658718
Q5CZB5;Q6NSG9		DKFZp686M0430	>tr|Q5CZB5|Q5CZB5_HUMAN Putative uncharacterized protein DKFZp686M0430 OS=Homo sapiens GN=DKFZp686M0430 PE=2 SV=1	1.5659	8	1.481	1.559	1.5951	0.675219	+	0.641437	+	0.62692	+	3	0.641437
Q16527;A0A024RBB5;F8VW96;F8VQR7	Cysteine and glycine-rich protein 2	CSRP2	>sp|Q16527|CSRP2_HUMAN Cysteine and glycine-rich protein 2 OS=Homo sapiens GN=CSRP2 PE=1 SV=3;>tr|A0A024RBB5|A0A024RBB5_HUMAN Cysteine and glycine-rich protein 2, isoform CRA_a OS=Homo sapiens GN=CSRP2 PE=4 SV=1;>tr|F8VW96|F8VW96_HUMAN Cysteine and glycine	1.5684	11	1.6794	1.452	1.5798	0.595451	+	0.688705	+	0.632992	+	3	0.632992
Q9Y3D8;Q9Y3D8-2;D6RDH4	Adenylate kinase isoenzyme 6	TAF9	>sp|Q9Y3D8|KAD6_HUMAN Adenylate kinase isoenzyme 6 OS=Homo sapiens GN=AK6 PE=1 SV=1;>sp|Q9Y3D8-2|KAD6_HUMAN Isoform 2 of Adenylate kinase isoenzyme 6 OS=Homo sapiens GN=AK6;>tr|D6RDH4|D6RDH4_HUMAN Transcription initiation factor TFIID subunit 9 OS=Homo sap	1.5713	6	1.3811	1.6261	2.1898	0.724061	+	0.614968	+	0.456663	+	3	0.614968
Q13907;Q13907-2	Isopentenyl-diphosphate Delta-isomerase 1	IDI1	>sp|Q13907|IDI1_HUMAN Isopentenyl-diphosphate Delta-isomerase 1 OS=Homo sapiens GN=IDI1 PE=1 SV=2;>sp|Q13907-2|IDI1_HUMAN Isoform 2 of Isopentenyl-diphosphate Delta-isomerase 1 OS=Homo sapiens GN=IDI1	1.592	8	1.8138	1.6854	1.5701	0.551329	+	0.593331	+	0.636902	+	3	0.593331
P06756-3;P06756-2;P06756;L7RXH0;A5YM53;B4DYQ7;H7BZG1	Integrin alpha-V;Integrin alpha-V heavy chain;Integrin alpha-V light chain	ITGAV	>sp|P06756-3|ITAV_HUMAN Isoform 3 of Integrin alpha-V OS=Homo sapiens GN=ITGAV;>sp|P06756-2|ITAV_HUMAN Isoform 2 of Integrin alpha-V OS=Homo sapiens GN=ITGAV;>sp|P06756|ITAV_HUMAN Integrin alpha-V OS=Homo sapiens GN=ITGAV PE=1 SV=2;>tr|L7RXH0|L7RXH0_HUMAN	1.6203	9	1.5537	1.7057	1.6365	0.643625	+	0.58627	+	0.61106	+	3	0.61106
Q5T6F2;B4E0R5;A6NCA8;F5H2U4;B4DRB6;B4DH66;Q5JV03;B3KQ73;A2A305;E7EWG4;B7Z7P2;B4DZ54;Q59EA0;Q5JV08;A2A306;Q6UWR4;Q9P0H6	Ubiquitin-associated protein 2	UBAP2	>sp|Q5T6F2|UBAP2_HUMAN Ubiquitin-associated protein 2 OS=Homo sapiens GN=UBAP2 PE=1 SV=1;>tr|B4E0R5|B4E0R5_HUMAN cDNA FLJ61517, highly similar to Homo sapiens ubiquitin associated protein 2 (UBAP2), transcript variant 1, mRNA OS=Homo sapiens PE=2 SV=1;>tr|	1.6244	10	1.5835	1.6571	1.678	0.631512	+	0.603464	+	0.595948	+	3	0.603464
P10645;G5E968;Q86T07	Chromogranin-A;Vasostatin-1;Vasostatin-2;EA-92;ES-43;Pancreastatin;SS-18;WA-8;WE-14;LF-19;AL-11;GV-19;GR-44;ER-37	CHGA	>sp|P10645|CMGA_HUMAN Chromogranin-A OS=Homo sapiens GN=CHGA PE=1 SV=7;>tr|G5E968|G5E968_HUMAN Chromogranin A (Parathyroid secretory protein 1), isoform CRA_b OS=Homo sapiens GN=CHGA PE=1 SV=1;>tr|Q86T07|Q86T07_HUMAN Full-length cDNA clone CS0DN001YP04 of	1.6293	32	1.6917	1.4204	1.6285	0.591121	+	0.704027	+	0.614062	+	3	0.614062
P07949-2;Q9UMQ4;P07949;F8TLW0;A0A024R7T2;B4DGX8;A0A024R7S5;A0A024R7T1;F8TLS5;Q9BTX6;Q8IZR8;Q9UQV8;C9JYL6	Proto-oncogene tyrosine-protein kinase receptor Ret;Soluble RET kinase fragment;Extracellular cell-membrane anchored RET cadherin 120 kDa fragment	RET	>sp|P07949-2|RET_HUMAN Isoform 2 of Proto-oncogene tyrosine-protein kinase receptor Ret OS=Homo sapiens GN=RET;>tr|Q9UMQ4|Q9UMQ4_HUMAN RET tyrosine kinase receptor (Fragment) OS=Homo sapiens GN=RET PE=3 SV=1;>sp|P07949|RET_HUMAN Proto-oncogene tyrosine-pro	1.6589	11	1.6575	1.6858	1.6644	0.603318	+	0.59319	+	0.600817	+	3	0.600817
Q04828;H0Y804;B4DK69;P52895;B4E0M1;A6NHU4;Q59GU2;P17516;P52895-2;S4R3D5;S4R3P0	Aldo-keto reductase family 1 member C1;Aldo-keto reductase family 1 member C2;Aldo-keto reductase family 1 member C4	AKR1C1;AKR1C2;AKR1C4	>sp|Q04828|AK1C1_HUMAN Aldo-keto reductase family 1 member C1 OS=Homo sapiens GN=AKR1C1 PE=1 SV=1;>tr|H0Y804|H0Y804_HUMAN Aldo-keto reductase family 1 member C1 (Fragment) OS=Homo sapiens GN=AKR1C1 PE=4 SV=1;>tr|B4DK69|B4DK69_HUMAN Aldo-keto reductase fami	1.6994	36	1.7092	1.684	1.6358	0.585069	+	0.593824	+	0.611322	+	3	0.593824
Q13126;Q13126-4;Q6FHT1;Q6FHP1;B4DUC8;Q13126-3;Q13126-2;Q13126-7;J3QSB7;Q13126-6;Q13126-5;F2Z2F3	S-methyl-5-thioadenosine phosphorylase;Purine nucleoside phosphorylase	MTAP	>sp|Q13126|MTAP_HUMAN S-methyl-5-thioadenosine phosphorylase OS=Homo sapiens GN=MTAP PE=1 SV=2;>sp|Q13126-4|MTAP_HUMAN Isoform 4 of S-methyl-5-thioadenosine phosphorylase OS=Homo sapiens GN=MTAP;>tr|Q6FHT1|Q6FHT1_HUMAN S-methyl-5-thioadenosine phosphory	1.7056	44	1.6833	1.6846	1.7671	0.594071	+	0.593613	+	0.565899	+	3	0.593613
Q6VY07;A0A024R5H6;Q6VY07-2;B4DF77;E9PNZ9;E9PPK2	Phosphofurin acidic cluster sorting protein 1	PACS1	>sp|Q6VY07|PACS1_HUMAN Phosphofurin acidic cluster sorting protein 1 OS=Homo sapiens GN=PACS1 PE=1 SV=2;>tr|A0A024R5H6|A0A024R5H6_HUMAN Phosphofurin acidic cluster sorting protein 1, isoform CRA_a OS=Homo sapiens GN=PACS1 PE=4 SV=1;>sp|Q6VY07-2|PACS1_HUMAN	1.738	6	1.7158	1.9495	1.7604	0.582819	+	0.512952	+	0.568053	+	3	0.568053
Q09666;Q6ZQN2;Q8N274;B4DTV0;Q13727;E9PQE3;E9PJZ0;E9PKR9;E9PJC6;E9PLK4;Q96EC4;Q09666-2;Q9BVU3;P48552;A8K171	Neuroblast differentiation-associated protein AHNAK	AHNAK	>sp|Q09666|AHNK_HUMAN Neuroblast differentiation-associated protein AHNAK OS=Homo sapiens GN=AHNAK PE=1 SV=2	1.7699	152	1.7579	1.7686	1.8189	0.568861	+	0.565419	+	0.549783	+	3	0.565419
P13591-1;P13591;S4R389;P13591-4;P13591-3;S4R3Z6;B4DSQ7;P13591-6;R4GMN9;H7BYX6;P13591-5;B7Z8D6;O00557	Neural cell adhesion molecule 1	NCAM1	>sp|P13591-1|NCAM1_HUMAN Isoform 2 of Neural cell adhesion molecule 1 OS=Homo sapiens GN=NCAM1;>sp|P13591|NCAM1_HUMAN Neural cell adhesion molecule 1 OS=Homo sapiens GN=NCAM1 PE=1 SV=3;>tr|S4R389|S4R389_HUMAN Neural cell adhesion molecule 1 (Fragment) OS=H	1.7867	15	1.6526	1.8572	1.8387	0.605107	+	0.538445	+	0.543863	+	3	0.543863
B4DJK9;Q99541;Q6FHZ7;B4DNH6;E9PG83;Q5SYF3;Q5SYF5;Q5SYF4	Perilipin-2	PLIN2;ADFP	>tr|B4DJK9|B4DJK9_HUMAN Perilipin OS=Homo sapiens PE=2 SV=1;>sp|Q99541|PLIN2_HUMAN Perilipin-2 OS=Homo sapiens GN=PLIN2 PE=1 SV=2;>tr|Q6FHZ7|Q6FHZ7_HUMAN Perilipin OS=Homo sapiens GN=ADFP PE=2 SV=1;>tr|B4DNH6|B4DNH6_HUMAN Perilipin OS=Homo sapiens PE=2 SV=	1.8669	8	2.0191	2.2856	1.7072	0.49527	+	0.437522	+	0.585754	+	3	0.49527
O15061-2;O15061;C9JIE4;H0YL34;O15061-3	Synemin	SYNM	>sp|O15061-2|SYNEM_HUMAN Isoform 2 of Synemin OS=Homo sapiens GN=SYNM;>sp|O15061|SYNEM_HUMAN Synemin OS=Homo sapiens GN=SYNM PE=1 SV=2;>tr|C9JIE4|C9JIE4_HUMAN Synemin OS=Homo sapiens GN=SYNM PE=1 SV=1;>tr|H0YL34|H0YL34_HUMAN Synemin OS=Homo sapiens GN=SYNM	1.9493	27	1.9057	2.0432	1.8898	0.524742	+	0.489428	+	0.529157	+	3	0.524742
Q96CX2;B3KY04;B4DQJ9;Q68DU8;A8K8W2;Q6ZWB6	BTB/POZ domain-containing protein KCTD12	KCTD12	>sp|Q96CX2|KCD12_HUMAN BTB/POZ domain-containing protein KCTD12 OS=Homo sapiens GN=KCTD12 PE=1 SV=1;>tr|B3KY04|B3KY04_HUMAN cDNA FLJ46506 fis, clone THYMU3030752, highly similar to BTB/POZ domain-containing protein KCTD12 OS=Homo sapiens PE=2 SV=1	1.9985	19	1.9696	2.1077	1.9916	0.507717	+	0.474451	+	0.502109	+	3	0.502109
Q53FA7;B4DMQ7;Q53FA7-2;H7BZH6	Quinone oxidoreductase PIG3	TP53I3	>sp|Q53FA7|QORX_HUMAN Quinone oxidoreductase PIG3 OS=Homo sapiens GN=TP53I3 PE=1 SV=2;>tr|B4DMQ7|B4DMQ7_HUMAN Tumor protein p53 inducible protein 3, isoform CRA_c OS=Homo sapiens GN=TP53I3 PE=2 SV=1;>sp|Q53FA7-2|QORX_HUMAN Isoform 2 of Quinone oxidoreducta	2.072	11	2.3077	1.8249	2.1225	0.433332	+	0.547975	+	0.471143	+	3	0.471143
P61978-3;B4DUQ1;Q5T6W5;Q5T6W2	Heterogeneous nuclear ribonucleoprotein K	HNRNPK	>sp|P61978-3|HNRPK_HUMAN Isoform 3 of Heterogeneous nuclear ribonucleoprotein K OS=Homo sapiens GN=HNRNPK;>tr|B4DUQ1|B4DUQ1_HUMAN cDNA FLJ54552, highly similar to Heterogeneous nuclear ribonucleoprotein K OS=Homo sapiens PE=2 SV=1;>tr|Q5T6W5|Q5T6W5_HUMAN H	2.1548	6	1.5083	3.0438	2.4978	0.662998	+	0.328537	+	0.400352	+	3	0.400352
Q8N995;Q5XJ04;Q01581;A0A024R059;D6RIW1	Hydroxymethylglutaryl-CoA synthase, cytoplasmic	HMGCS1	>tr|Q8N995|Q8N995_HUMAN cDNA FLJ38173 fis, clone FCBBF1000053, highly similar to HYDROXYMETHYLGLUTARYL-COA SYNTHASE, CYTOPLASMIC OS=Homo sapiens PE=2 SV=1;>tr|Q5XJ04|Q5XJ04_HUMAN 3-hydroxy-3-methylglutaryl-Coenzyme A synthase 1 (Soluble) OS=Homo sapiens GN	2.3	13	1.8931	2.3	1.7637	0.528234	+	0.434783	+	0.56699	+	3	0.528234
P09493-3;D9YZV5;Q15657;P09493-9	Tropomyosin alpha-1 chain	TPM1	>sp|P09493-3|TPM1_HUMAN Isoform 3 of Tropomyosin alpha-1 chain OS=Homo sapiens GN=TPM1;>tr|D9YZV5|D9YZV5_HUMAN Tropomyosin 1 (Alpha) isoform 4 OS=Homo sapiens GN=TPM1 PE=3 SV=1;>tr|Q15657|Q15657_HUMAN Tropomyosin isoform OS=Homo sapiens PE=1 SV=1;>sp|P0949	2.3081	13	2.4471	1.7015	2.3249	0.408647	+	0.587717	+	0.430126	+	3	0.430126
P29762;F1T0F7;B5MCB5	Cellular retinoic acid-binding protein 1	CRABP1	>sp|P29762|RABP1_HUMAN Cellular retinoic acid-binding protein 1 OS=Homo sapiens GN=CRABP1 PE=1 SV=2;>tr|F1T0F7|F1T0F7_HUMAN Cellular retinoic acid binding protein 1 OS=Homo sapiens GN=CRABP1 PE=2 SV=1;>tr|B5MCB5|B5MCB5_HUMAN Cellular retinoic acid-binding	2.7477	12	2.7215	2.8381	2.645	0.367444	+	0.352348	+	0.378072	+	3	0.367444
B4DIT7;F5H6P0;B4DTN7;V9HWG3;P21980;P21980-2;Q6DKH2	Protein-glutamine gamma-glutamyltransferase 2	TGM2	>tr|B4DIT7|B4DIT7_HUMAN Protein-glutamine gamma-glutamyltransferase 2 OS=Homo sapiens GN=TGM2 PE=1 SV=1;>tr|F5H6P0|F5H6P0_HUMAN Protein-glutamine gamma-glutamyltransferase 2 OS=Homo sapiens GN=TGM2 PE=1 SV=1;>tr|B4DTN7|B4DTN7_HUMAN cDNA FLJ57198, highly si	3.3244	5	2.5153	3.3244	3.0961	0.397567	+	0.300806	+	0.322987	+	3	0.322987
P35527;CON__P35527;K7EQQ3	Keratin, type I cytoskeletal 9	KRT9	>sp|P35527|K1C9_HUMAN Keratin, type I cytoskeletal 9 OS=Homo sapiens GN=KRT9 PE=1 SV=3;>P35527 SWISS-PROT:P35527 Tax_Id=9606 Gene_Symbol=KRT9 Keratin, type I cytoskeletal 9	0.28845	11	NaN	0.16885	0.31735	NaN		5.92242	+	3.1511	+	2	4.53676
B4DLE7;Q6UWP7-3;Q6UWP7;C9J5S5;C9JA02;C9JMW2;C9JUV9;C9JXY8;C9J6F4;C9K0C3;B4DM26;Q6UWP7-2;B4DYR5	Lysocardiolipin acyltransferase 1	LCLAT1	>tr|B4DLE7|B4DLE7_HUMAN cDNA FLJ50983, highly similar to Homo sapiens lysocardiolipin acyltransferase (LYCAT), transcript variant 1, mRNA OS=Homo sapiens PE=2 SV=1;>sp|Q6UWP7-3|LCLT1_HUMAN Isoform 3 of Lysocardiolipin acyltransferase 1 OS=Homo sapiens GN=L	0.32247	4	0.32247	0.13942	NaN	3.10106	+	7.17257	+	NaN		2	5.13682
E7EU50;B4DSM9;O43602-2;O43602-4;O43602-5;O43602-3;A8K340;B4DM53;H3BLV5;O43602	Neuronal migration protein doublecortin	DCX	>tr|E7EU50|E7EU50_HUMAN Neuronal migration protein doublecortin (Fragment) OS=Homo sapiens GN=DCX PE=4 SV=1;>tr|B4DSM9|B4DSM9_HUMAN cDNA FLJ51296, highly similar to Neuronal migration protein doublecortin OS=Homo sapiens PE=2 SV=1;>sp|O43602-2|DCX_HUMAN Is	0.37071	6	0.37071	0.32625	NaN	2.69753	+	3.06513	+	NaN		2	2.88133
Q9Y2H5;Q5VTI5	Pleckstrin homology domain-containing family A member 6	PLEKHA6	>sp|Q9Y2H5|PKHA6_HUMAN Pleckstrin homology domain-containing family A member 6 OS=Homo sapiens GN=PLEKHA6 PE=1 SV=4;>tr|Q5VTI5|Q5VTI5_HUMAN Pleckstrin homology domain-containing family A member 6 OS=Homo sapiens GN=PLEKHA6 PE=1 SV=1	0.40147	3	0.3522	0.43204	NaN	2.8393	+	2.3146	+	NaN		2	2.57695
Q9NVM9;Q9NW22;H0YH12;B4DNK1;Q9BZT6;F5H5W1;F5H457	Protein asunder homolog	ASUN	>sp|Q9NVM9|ASUN_HUMAN Protein asunder homolog OS=Homo sapiens GN=ASUN PE=1 SV=2;>tr|Q9NW22|Q9NW22_HUMAN cDNA FLJ10360 fis, clone NT2RM2001247 OS=Homo sapiens PE=2 SV=1;>tr|H0YH12|H0YH12_HUMAN Protein asunder homolog (Fragment) OS=Homo sapiens GN=ASUN PE=1	0.43856	6	0.63507	0.28508	NaN	1.57463	+	3.50779	+	NaN		2	2.54121
Q9UI36-2;Q9UI36;Q9UI36-4;Q9UI36-3	Dachshund homolog 1	DACH1	>sp|Q9UI36-2|DACH1_HUMAN Isoform 2 of Dachshund homolog 1 OS=Homo sapiens GN=DACH1;>sp|Q9UI36|DACH1_HUMAN Dachshund homolog 1 OS=Homo sapiens GN=DACH1 PE=1 SV=3;>sp|Q9UI36-4|DACH1_HUMAN Isoform 4 of Dachshund homolog 1 OS=Homo sapiens GN=DACH1;>sp|Q9UI36-3	0.45322	5	NaN	0.70874	0.40055	NaN		1.41095	+	2.49657	+	2	1.95376
P35659;P35659-2;B4DFG0;B4DNW3;D6RDA2;D6R9L5;H0Y993;Q6MZJ9;H0Y8X0	Protein DEK	DEK	>sp|P35659|DEK_HUMAN Protein DEK OS=Homo sapiens GN=DEK PE=1 SV=1;>sp|P35659-2|DEK_HUMAN Isoform 2 of Protein DEK OS=Homo sapiens GN=DEK;>tr|B4DFG0|B4DFG0_HUMAN Protein DEK OS=Homo sapiens GN=DEK PE=1 SV=1;>tr|B4DNW3|B4DNW3_HUMAN cDNA FLJ51914, highly simi	0.53799	17	0.16345	0.84466	0.35416	6.11808	+	1.18391		2.82358	+	2	2.82358
F8W8C1;J3QSX0;Q6ZTA4;Q6ZTA4-2	Tripartite motif-containing protein 67	TRIM67	>tr|F8W8C1|F8W8C1_HUMAN Tripartite motif-containing protein 67 OS=Homo sapiens GN=TRIM67 PE=4 SV=1;>tr|J3QSX0|J3QSX0_HUMAN Tripartite motif-containing protein 67 OS=Homo sapiens GN=TRIM67 PE=4 SV=1;>sp|Q6ZTA4|TRI67_HUMAN Tripartite motif-containing protein	0.54363	8	0.60362	0.48412	NaN	1.65667	+	2.0656	+	NaN		2	1.86114
B3KMF8;Q8WUH6	UPF0444 transmembrane protein C12orf23	C12orf23	>tr|B3KMF8|B3KMF8_HUMAN cDNA FLJ10869 fis, clone NT2RP4001677 OS=Homo sapiens PE=2 SV=1;>sp|Q8WUH6|TM263_HUMAN Transmembrane protein 263 OS=Homo sapiens GN=TMEM263 PE=1 SV=1	0.56632	5	NaN	0.45759	0.60803	NaN		2.18536	+	1.64466	+	2	1.91501
F8WF16;B7Z615;Q8NEY8-6;B7Z8L1;Q8NEY8-9;F8W6A0;B7Z8M9;Q8NEY8-8;Q8NEY8-2;F8W0Q9;B7Z695;Q8NEY8-3;Q8NEY8	Periphilin-1	PPHLN1	>tr|F8WF16|F8WF16_HUMAN Periphilin-1 OS=Homo sapiens GN=PPHLN1 PE=1 SV=1;>tr|B7Z615|B7Z615_HUMAN cDNA FLJ54524, highly similar to Homo sapiens periphilin 1 (PPHLN1), transcript variant 4, mRNA OS=Homo sapiens PE=2 SV=1;>sp|Q8NEY8-6|PPHLN_HUMAN Isoform 6 of	0.57321	6	0.76951	0.53271	0.57321	1.29953		1.87719	+	1.74456	+	2	1.74456
Q9UHG2	ProSAAS;KEP;Big SAAS;Little SAAS;Big PEN-LEN;PEN;Little LEN;Big LEN	PCSK1N	>sp|Q9UHG2|PCSK1_HUMAN ProSAAS OS=Homo sapiens GN=PCSK1N PE=1 SV=1	0.57722	5	NaN	0.59123	0.59376	NaN		1.69139	+	1.68418	+	2	1.68779
Q9UK08	Guanine nucleotide-binding protein G(I)/G(S)/G(O) subunit gamma-8	GNG8	>sp|Q9UK08|GBG8_HUMAN Guanine nucleotide-binding protein G(I)/G(S)/G(O) subunit gamma-8 OS=Homo sapiens GN=GNG8 PE=1 SV=1	0.60846	3	0.60983	0.63128	NaN	1.6398	+	1.58408	+	NaN		2	1.61194
O60507;A0A024RDK9;Q75M96;Q75ML6;C9J3I4	Protein-tyrosine sulfotransferase 1	TPST1	>sp|O60507|TPST1_HUMAN Protein-tyrosine sulfotransferase 1 OS=Homo sapiens GN=TPST1 PE=2 SV=1;>tr|A0A024RDK9|A0A024RDK9_HUMAN Tyrosylprotein sulfotransferase 1, isoform CRA_a OS=Homo sapiens GN=TPST1 PE=4 SV=1;>tr|Q75M96|Q75M96_HUMAN Putative uncharacteriz	0.61078	3	0.68145	NaN	0.73356	1.46746	+	NaN		1.36322	+	2	1.41534
P11908;B2R860;P11908-2;D3YTJ7;H7C540	Ribose-phosphate pyrophosphokinase 2;Ribose-phosphate pyrophosphokinase	PRPS2	>sp|P11908|PRPS2_HUMAN Ribose-phosphate pyrophosphokinase 2 OS=Homo sapiens GN=PRPS2 PE=1 SV=2;>tr|B2R860|B2R860_HUMAN cDNA, FLJ93752, highly similar to Homo sapiens phosphoribosyl pyrophosphate synthetase 2 (PRPS2), mRNA OS=Homo sapiens PE=2 SV=1;>sp|P119	0.63979	6	0.67432	0.63244	NaN	1.48298	+	1.58118	+	NaN		2	1.53208
Q12756;Q12756-3;Q12756-2;X5D7J0;F8W8V9;B4DMM0;X5D2L7;H7C437;H7C3Y8;G1UI30;H7C0K6	Kinesin-like protein KIF1A	KIF1A	>sp|Q12756|KIF1A_HUMAN Kinesin-like protein KIF1A OS=Homo sapiens GN=KIF1A PE=1 SV=2;>sp|Q12756-3|KIF1A_HUMAN Isoform 3 of Kinesin-like protein KIF1A OS=Homo sapiens GN=KIF1A;>sp|Q12756-2|KIF1A_HUMAN Isoform 2 of Kinesin-like protein KIF1A OS=Homo sapiens	0.64445	17	0.65685	0.63978	0.82007	1.52242	+	1.56304	+	1.21941		2	1.52242
O75223;M0QZK8;O75223-3;B3KMN7;B8ZZK2;H7BZK5;O75223-2;O75223-4	Gamma-glutamylcyclotransferase	GGCT	>sp|O75223|GGCT_HUMAN Gamma-glutamylcyclotransferase OS=Homo sapiens GN=GGCT PE=1 SV=1;>tr|M0QZK8|M0QZK8_HUMAN Gamma-glutamylcyclotransferase OS=Homo sapiens GN=GGCT PE=1 SV=1;>sp|O75223-3|GGCT_HUMAN Isoform 3 of Gamma-glutamylcyclotransferase OS=Homo sapi	0.65099	3	NaN	0.67441	0.58643	NaN		1.48278	+	1.70523	+	2	1.59401
Q6PI48;A8K4A8;A0A024R8Z9;Q9H9J7;Q9NVT8;Q9H9M6	Aspartate--tRNA ligase, mitochondrial	DARS2	>sp|Q6PI48|SYDM_HUMAN Aspartate--tRNA ligase, mitochondrial OS=Homo sapiens GN=DARS2 PE=1 SV=1;>tr|A8K4A8|A8K4A8_HUMAN cDNA FLJ76156, highly similar to Homo sapiens aspartyl-tRNA synthetase 2 (DARS2), mRNA OS=Homo sapiens PE=2 SV=1;>tr|A0A024R8Z9|A0A024R8Z	0.67542	8	0.66763	1.0934	0.6716	1.49784	+	0.914578		1.48898	+	2	1.48898
K7EM09;K7EPR0;K7ELQ9;Q6UW68;A0A024R7D3	Transmembrane protein 205	TMEM205	>tr|K7EM09|K7EM09_HUMAN Transmembrane protein 205 (Fragment) OS=Homo sapiens GN=TMEM205 PE=1 SV=1;>tr|K7EPR0|K7EPR0_HUMAN Transmembrane protein 205 OS=Homo sapiens GN=TMEM205 PE=1 SV=1;>tr|K7ELQ9|K7ELQ9_HUMAN Transmembrane protein 205 (Fragment) OS=Homo sa	0.67768	7	0.62809	0.67768	0.79508	1.59213	+	1.47562	+	1.25774		2	1.47562
Q9Y394-2;Q9Y394;H0YJ66;H0YJE4;H0YJR8;Q659E8	Dehydrogenase/reductase SDR family member 7	DHRS7	>sp|Q9Y394-2|DHRS7_HUMAN Isoform 2 of Dehydrogenase/reductase SDR family member 7 OS=Homo sapiens GN=DHRS7;>sp|Q9Y394|DHRS7_HUMAN Dehydrogenase/reductase SDR family member 7 OS=Homo sapiens GN=DHRS7 PE=1 SV=1;>tr|H0YJ66|H0YJ66_HUMAN Dehydrogenase/reductase	0.684	7	0.66076	0.73104	0.7805	1.51341	+	1.36791	+	1.28123		2	1.36791
Q53Y83;Q53HF3;P06280;V9GYN5	Alpha-galactosidase A	GLA	>tr|Q53Y83|Q53Y83_HUMAN Galactosidase, alpha OS=Homo sapiens GN=GLA PE=2 SV=1;>tr|Q53HF3|Q53HF3_HUMAN Galactosidase, alpha variant (Fragment) OS=Homo sapiens PE=2 SV=1;>sp|P06280|AGAL_HUMAN Alpha-galactosidase A OS=Homo sapiens GN=GLA PE=1 SV=1;>tr|V9GYN5|	0.6872	5	0.6448	NaN	0.69297	1.55087	+	NaN		1.44306	+	2	1.49697
B4DXT5;B3KML8;Q8N0X7;A8K6Q9;A0A024RDV9	Spartin	SPG20	>tr|B4DXT5|B4DXT5_HUMAN cDNA FLJ53483, highly similar to Spartin OS=Homo sapiens PE=2 SV=1;>tr|B3KML8|B3KML8_HUMAN cDNA FLJ11345 fis, clone PLACE1010877, highly similar to Spartin OS=Homo sapiens PE=2 SV=1;>sp|Q8N0X7|SPG20_HUMAN Spartin OS=Homo sapiens GN=	0.68817	5	0.74949	0.59829	0.72304	1.33424		1.67143	+	1.38305	+	2	1.38305
Q71UH4;Q02880-2;Q02880;B4DKD0;Q59H80;E9PCY5;B7ZB27;B4DLV2;Q8WTY5;Q6W6M6	DNA topoisomerase 2;DNA topoisomerase 2-beta	TOP2B	>tr|Q71UH4|Q71UH4_HUMAN DNA topoisomerase 2 (Fragment) OS=Homo sapiens GN=TOP2B PE=3 SV=1;>sp|Q02880-2|TOP2B_HUMAN Isoform Beta-1 of DNA topoisomerase 2-beta OS=Homo sapiens GN=TOP2B;>sp|Q02880|TOP2B_HUMAN DNA topoisomerase 2-beta OS=Homo sapiens GN=TOP2B	0.69	14	0.64228	0.91972	0.69366	1.55695	+	1.08729		1.44163	+	2	1.44163
Q14651;C9JAM8;C9JYI1;C9JAM3;C9JVY2;C9JU08;C9J359;C9J0F3	Plastin-1	PLS1	>sp|Q14651|PLSI_HUMAN Plastin-1 OS=Homo sapiens GN=PLS1 PE=1 SV=2	0.69689	16	0.61859	0.59781	0.80099	1.61658	+	1.67277	+	1.24846		2	1.61658
A6NHN7;Q14202-2;Q14202;A6NHB5	Zinc finger MYM-type protein 3	ZMYM3	>tr|A6NHN7|A6NHN7_HUMAN Zinc finger MYM-type protein 3 OS=Homo sapiens GN=ZMYM3 PE=1 SV=1;>sp|Q14202-2|ZMYM3_HUMAN Isoform 2 of Zinc finger MYM-type protein 3 OS=Homo sapiens GN=ZMYM3;>sp|Q14202|ZMYM3_HUMAN Zinc finger MYM-type protein 3 OS=Homo sapiens GN	0.70128	6	0.71104	0.45551	NaN	1.40639	+	2.19534	+	NaN		2	1.80087
P21741-2;E9PPJ5;P21741;E9PLM6	Midkine	MDK	>sp|P21741-2|MK_HUMAN Isoform 2 of Midkine OS=Homo sapiens GN=MDK;>tr|E9PPJ5|E9PPJ5_HUMAN Midkine (Fragment) OS=Homo sapiens GN=MDK PE=4 SV=1;>sp|P21741|MK_HUMAN Midkine OS=Homo sapiens GN=MDK PE=1 SV=1;>tr|E9PLM6|E9PLM6_HUMAN Midkine OS=Homo sapiens GN=MD	0.70706	4	NaN	0.73437	0.68655	NaN		1.36171	+	1.45656	+	2	1.40913
F5H7V7;P51970;B7Z768	NADH dehydrogenase [ubiquinone] 1 alpha subcomplex subunit 8	NDUFA8	>tr|F5H7V7|F5H7V7_HUMAN NADH dehydrogenase [ubiquinone] 1 alpha subcomplex subunit 8 OS=Homo sapiens GN=NDUFA8 PE=1 SV=1;>sp|P51970|NDUA8_HUMAN NADH dehydrogenase [ubiquinone] 1 alpha subcomplex subunit 8 OS=Homo sapiens GN=NDUFA8 PE=1 SV=3;>tr|B7Z768|B7Z7	0.70734	11	0.68993	0.76197	0.867	1.44942	+	1.31239	+	1.1534		2	1.31239
Q7Z7L8	Uncharacterized protein C11orf96	C11orf96	>sp|Q7Z7L8|CK096_HUMAN Uncharacterized protein C11orf96 OS=Homo sapiens GN=C11orf96 PE=1 SV=3	0.70812	5	0.69635	0.7341	0.77326	1.43606	+	1.36221	+	1.29323		2	1.36221
Q16566;B2R747;D6RCD6;D6REY7;D6RE65	Calcium/calmodulin-dependent protein kinase type IV	CAMK4	>sp|Q16566|KCC4_HUMAN Calcium/calmodulin-dependent protein kinase type IV OS=Homo sapiens GN=CAMK4 PE=1 SV=1;>tr|B2R747|B2R747_HUMAN cDNA, FLJ93281, highly similar to Homo sapiens calcium/calmodulin-dependent protein kinase IV (CAMK4), mRNA OS=Homo sapiens	0.70866	12	0.71401	0.79909	0.70615	1.40054	+	1.25142		1.41613	+	2	1.40054
B7Z6Y2;O00499-9;A0A024RAI6;O00499-10;A0A024RAG9;Q9BTH3;O00499-7;A0A024RAG8;O00499-8;A0A024RAE9;O00499-4;A0A024RAI4;O00499-6;A0A024RAI5;O00499-11;A0A024RAJ2;O00499-3;A0A024RAJ3;O00499-2;A0A024RAF0;O00499-5;A0A024RAF6;O00499;A0A024RAF1;B7Z2Z2;Q8WWH9	Myc box-dependent-interacting protein 1	BIN1	>tr|B7Z6Y2|B7Z6Y2_HUMAN cDNA FLJ54942, highly similar to Homo sapiens bridging integrator 1 (BIN1), transcript variant 10, mRNA OS=Homo sapiens PE=2 SV=1;>sp|O00499-9|BIN1_HUMAN Isoform BIN1-10-13 of Myc box-dependent-interacting protein 1 OS=Homo sapiens	0.7131	6	0.71423	0.67138	0.82195	1.40011	+	1.48947	+	1.21662		2	1.40011
Q8TAR8;Q9Y2L9-2;A8KA33;Q9Y2L9;Q9Y2L9-3	Leucine-rich repeat and calponin homology domain-containing protein 1	LRCH1	>tr|Q8TAR8|Q8TAR8_HUMAN LRCH1 protein (Fragment) OS=Homo sapiens GN=LRCH1 PE=2 SV=1;>sp|Q9Y2L9-2|LRCH1_HUMAN Isoform 2 of Leucine-rich repeat and calponin homology domain-containing protein 1 OS=Homo sapiens GN=LRCH1;>tr|A8KA33|A8KA33_HUMAN cDNA FLJ76690,	0.71563	3	NaN	0.68918	0.67017	NaN		1.451	+	1.49216	+	2	1.47158
Q9H9Y2;X6R7Q1	Ribosome production factor 1	RPF1	>sp|Q9H9Y2|RPF1_HUMAN Ribosome production factor 1 OS=Homo sapiens GN=RPF1 PE=1 SV=2;>tr|X6R7Q1|X6R7Q1_HUMAN Ribosome production factor 1 OS=Homo sapiens GN=RPF1 PE=4 SV=1	0.71982	4	0.5796	0.922	0.66744	1.72533	+	1.0846		1.49826	+	2	1.49826
O43251-6;O43251-8;S4R3K7;S4R469;Q8TCM0;F8VR27;F8VZY7;Q59HD3;A6NFN3;B4DF29;B0QYV1;O43251-3;J3QRF4;X5DP44;O43251-9;Q9NWB1-3;O43251-4;B7ZLH9;B0QYY4;O43251-5;O43251-10;O43251-2;O43251;F8WSN4;F8VRS4;Q9NWB1-4;X5D7T5;Q9NWB1-5;Q9NWB1;O43251-7;J3KNW3;X5DNY3;Q9NWB1-2;B7Z1U7;F8VZG9	RNA binding protein fox-1 homolog 2;RNA binding protein fox-1 homolog 3;RNA binding protein fox-1 homolog;RNA binding protein fox-1 homolog 1	RBFOX2;DKFZp547L059;RBFOX1;RBFOX3;RBM9;A2BP1	>sp|O43251-6|RFOX2_HUMAN Isoform 6 of RNA binding protein fox-1 homolog 2 OS=Homo sapiens GN=RBFOX2;>sp|O43251-8|RFOX2_HUMAN Isoform 8 of RNA binding protein fox-1 homolog 2 OS=Homo sapiens GN=RBFOX2;>tr|S4R3K7|S4R3K7_HUMAN RNA-binding protein fox-1 homolo	0.72109	6	0.82185	0.72957	0.72999	1.21677		1.37067	+	1.36988	+	2	1.36988
Q96MG7	Melanoma-associated antigen G1	NDNL2	>sp|Q96MG7|MAGG1_HUMAN Melanoma-associated antigen G1 OS=Homo sapiens GN=NDNL2 PE=1 SV=1	0.72196	4	NaN	0.70345	0.74096	NaN		1.42157	+	1.3496	+	2	1.38558
Q96HY7;H7C1J3;C9JWN1	Probable 2-oxoglutarate dehydrogenase E1 component DHKTD1, mitochondrial	DHTKD1	>sp|Q96HY7|DHTK1_HUMAN Probable 2-oxoglutarate dehydrogenase E1 component DHKTD1, mitochondrial OS=Homo sapiens GN=DHTKD1 PE=1 SV=2;>tr|H7C1J3|H7C1J3_HUMAN Probable 2-oxoglutarate dehydrogenase E1 component DHKTD1, mitochondrial (Fragment) OS=Homo sapiens	0.72474	18	0.76487	0.71996	0.71794	1.30741		1.38897	+	1.39287	+	2	1.38897
Q9H0W9-2;Q9H0W9;A8K718;A0A024R396;E9PJU8;Q9H0W9-4;E9PQS1;Q9H0W9-3;A0A024R3B0;E9PPB5;E9PR95;E9PSC3;E9PLC5;E9PLB3;E9PIP1	Ester hydrolase C11orf54	C11orf54	>sp|Q9H0W9-2|CK054_HUMAN Isoform 2 of Ester hydrolase C11orf54 OS=Homo sapiens GN=C11orf54;>sp|Q9H0W9|CK054_HUMAN Ester hydrolase C11orf54 OS=Homo sapiens GN=C11orf54 PE=1 SV=1;>tr|A8K718|A8K718_HUMAN cDNA FLJ77502 OS=Homo sapiens PE=2 SV=1;>tr|A0A024R396|	0.72523	8	0.74571	0.70391	0.79299	1.341	+	1.42064	+	1.26105		2	1.341
P51991;B4E036	Heterogeneous nuclear ribonucleoprotein A3	HNRNPA3	>sp|P51991|ROA3_HUMAN Heterogeneous nuclear ribonucleoprotein A3 OS=Homo sapiens GN=HNRNPA3 PE=1 SV=2	0.72688	9	0.55644	0.73579	0.7745	1.79714	+	1.35908	+	1.29116		2	1.35908
O15020-2;O15020;A4QPE4	Spectrin beta chain, non-erythrocytic 2	SPTBN2	>sp|O15020-2|SPTN2_HUMAN Isoform 2 of Spectrin beta chain, non-erythrocytic 2 OS=Homo sapiens GN=SPTBN2;>sp|O15020|SPTN2_HUMAN Spectrin beta chain, non-erythrocytic 2 OS=Homo sapiens GN=SPTBN2 PE=1 SV=3	0.72806	13	0.76326	0.76921	0.70963	1.31017		1.30004	+	1.40919	+	2	1.31017
J3QRD1;Q59H65;P51648;P51648-2;Q68D64;I3L1M4;J3QKK9;K7EN73;J3QS00;J3KTG1;C9JGJ2;I3L0X1	Aldehyde dehydrogenase;Fatty aldehyde dehydrogenase	ALDH3A2;DKFZp686E23276	>tr|J3QRD1|J3QRD1_HUMAN Fatty aldehyde dehydrogenase OS=Homo sapiens GN=ALDH3A2 PE=1 SV=1;>tr|Q59H65|Q59H65_HUMAN Aldehyde dehydrogenase 3A2 variant (Fragment) OS=Homo sapiens PE=2 SV=1;>sp|P51648|AL3A2_HUMAN Fatty aldehyde dehydrogenase OS=Homo sapiens GN	0.72815	10	0.79576	0.75925	0.6468	1.25666		1.31709	+	1.54607	+	2	1.31709
Q9Y2W6-3;Q5SZR4;B3KPI5;Q9Y2W6;B4DZR8;B4DJ68;E9PKN8;B7ZAG4	Tudor and KH domain-containing protein	TDRKH	>sp|Q9Y2W6-3|TDRKH_HUMAN Isoform 2 of Tudor and KH domain-containing protein OS=Homo sapiens GN=TDRKH;>tr|Q5SZR4|Q5SZR4_HUMAN Tudor and KH domain containing, isoform CRA_a OS=Homo sapiens GN=TDRKH PE=4 SV=1;>tr|B3KPI5|B3KPI5_HUMAN cDNA FLJ31840 fis, clone	0.72955	5	0.72955	NaN	0.71461	1.37071	+	NaN		1.39936	+	2	1.38504
Q13330-3;E7ESY4;Q13330;Q13330-2;A0A024R6P5;Q59FW1;H0Y4T7;Q86TR6;F8VSM3;Q9BRL8;F8W9Y9;H7C3F3	Metastasis-associated protein MTA1	MTA1	>sp|Q13330-3|MTA1_HUMAN Isoform 3 of Metastasis-associated protein MTA1 OS=Homo sapiens GN=MTA1;>tr|E7ESY4|E7ESY4_HUMAN Metastasis-associated protein MTA1 OS=Homo sapiens GN=MTA1 PE=1 SV=1;>sp|Q13330|MTA1_HUMAN Metastasis-associated protein MTA1 OS=Homo sa	0.73348	14	0.73677	0.71284	0.75965	1.35728	+	1.40284	+	1.3164		2	1.35728
Q5JSL3;A6NIW2	Dedicator of cytokinesis protein 11	DOCK11	>sp|Q5JSL3|DOC11_HUMAN Dedicator of cytokinesis protein 11 OS=Homo sapiens GN=DOCK11 PE=1 SV=2;>tr|A6NIW2|A6NIW2_HUMAN Dedicator of cytokinesis protein 11 OS=Homo sapiens GN=DOCK11 PE=1 SV=2	0.73383	14	0.69153	0.67239	0.82089	1.44607	+	1.48723	+	1.21819		2	1.44607
Q9P0J0;B4DF76;J3KN00;U3KQP3;B4DEZ3;K7EJE1;E7ENQ6;B4DQP1	NADH dehydrogenase [ubiquinone] 1 alpha subcomplex subunit 13	NDUFA13;YJEFN3	>sp|Q9P0J0|NDUAD_HUMAN NADH dehydrogenase [ubiquinone] 1 alpha subcomplex subunit 13 OS=Homo sapiens GN=NDUFA13 PE=1 SV=3;>tr|B4DF76|B4DF76_HUMAN NADH dehydrogenase [ubiquinone] 1 alpha subcomplex subunit 13 OS=Homo sapiens GN=NDUFA13 PE=1 SV=1;>tr|J3KN00|	0.73395	7	0.69394	0.75139	NaN	1.44105	+	1.33087	+	NaN		2	1.38596
Q9UKY1;A8K0G7;A0A024R9F1	Zinc fingers and homeoboxes protein 1	ZHX1	>sp|Q9UKY1|ZHX1_HUMAN Zinc fingers and homeoboxes protein 1 OS=Homo sapiens GN=ZHX1 PE=1 SV=1;>tr|A8K0G7|A8K0G7_HUMAN cDNA FLJ78425, highly similar to Homo sapiens zinc fingers and homeoboxes 1 (ZHX1), mRNA OS=Homo sapiens PE=2 SV=1;>tr|A0A024R9F1|A0A024R9	0.73479	4	0.71538	0.75349	NaN	1.39786	+	1.32716	+	NaN		2	1.36251
Q49AN9;F5H013;P62308;A8MWD9	Small nuclear ribonucleoprotein G;Small nuclear ribonucleoprotein G-like protein	SNRPG	>tr|Q49AN9|Q49AN9_HUMAN SNRPG protein OS=Homo sapiens GN=SNRPG PE=2 SV=1;>tr|F5H013|F5H013_HUMAN Small nuclear ribonucleoprotein G OS=Homo sapiens GN=SNRPG PE=4 SV=1;>sp|P62308|RUXG_HUMAN Small nuclear ribonucleoprotein G OS=Homo sapiens GN=SNRPG PE=1 SV=1	0.73645	10	NaN	0.70848	0.69925	NaN		1.41147	+	1.4301	+	2	1.42079
Q86SX6	Glutaredoxin-related protein 5, mitochondrial	GLRX5	>sp|Q86SX6|GLRX5_HUMAN Glutaredoxin-related protein 5, mitochondrial OS=Homo sapiens GN=GLRX5 PE=1 SV=2	0.73734	4	0.89823	0.32098	0.60527	1.1133		3.11546	+	1.65216	+	2	1.65216
Q86UA8;P28370-2;P28370;B7ZLQ5;D7EZH4	Probable global transcription activator SNF2L1	SMARCA1	>tr|Q86UA8|Q86UA8_HUMAN SMARCA1 protein (Fragment) OS=Homo sapiens GN=SMARCA1 PE=2 SV=2;>sp|P28370-2|SMCA1_HUMAN Isoform 2 of Probable global transcription activator SNF2L1 OS=Homo sapiens GN=SMARCA1;>sp|P28370|SMCA1_HUMAN Probable global transcription act	0.74186	6	0.74249	0.76979	0.70144	1.34682	+	1.29906		1.42564	+	2	1.34682
Q99808;B3KQV7;B7Z1J8;B7Z914	Equilibrative nucleoside transporter 1	SLC29A1	>sp|Q99808|S29A1_HUMAN Equilibrative nucleoside transporter 1 OS=Homo sapiens GN=SLC29A1 PE=1 SV=3;>tr|B3KQV7|B3KQV7_HUMAN Equilibrative nucleoside transporter 1 OS=Homo sapiens GN=SLC29A1 PE=1 SV=1	0.74223	4	0.53067	0.76943	1.3143	1.88441	+	1.29966	+	0.760861		2	1.29966
G3V5X4;D4YW74;Q8WXH0;Q8WXH0-2;Q8WXH0-7;Q68DP1;Q8WXH0-4;Q8WXH0-3;Q6MZP0;G3V4T3;Q7Z362	Nesprin-2	SYNE2;TROPH	>tr|G3V5X4|G3V5X4_HUMAN Nesprin-2 OS=Homo sapiens GN=SYNE2 PE=1 SV=1;>tr|D4YW74|D4YW74_HUMAN Polytrophin OS=Homo sapiens GN=TROPH PE=2 SV=1;>sp|Q8WXH0|SYNE2_HUMAN Nesprin-2 OS=Homo sapiens GN=SYNE2 PE=1 SV=3;>sp|Q8WXH0-2|SYNE2_HUMAN Isoform 2 of Nesprin-2	0.74278	14	0.80149	0.68385	0.62053	1.24768		1.46231	+	1.61153	+	2	1.46231
Q9Y305-3;Q9Y305-2;Q9Y305;Q9Y305-4;H7C5Q2;Q9H2R8;C9J7L8;Q96EA2	Acyl-coenzyme A thioesterase 9, mitochondrial	ACOT9	>sp|Q9Y305-3|ACOT9_HUMAN Isoform 3 of Acyl-coenzyme A thioesterase 9, mitochondrial OS=Homo sapiens GN=ACOT9;>sp|Q9Y305-2|ACOT9_HUMAN Isoform 2 of Acyl-coenzyme A thioesterase 9, mitochondrial OS=Homo sapiens GN=ACOT9;>sp|Q9Y305|ACOT9_HUMAN Acyl-coenzyme A	0.74304	15	0.73909	0.79908	0.70566	1.35302	+	1.25144		1.41711	+	2	1.35302
H0YGS7;Q6PJ69	Tripartite motif-containing protein 65	TRIM65	>tr|H0YGS7|H0YGS7_HUMAN Tripartite motif-containing protein 65 (Fragment) OS=Homo sapiens GN=TRIM65 PE=4 SV=1;>sp|Q6PJ69|TRI65_HUMAN Tripartite motif-containing protein 65 OS=Homo sapiens GN=TRIM65 PE=1 SV=3	0.74446	4	NaN	0.74831	0.72843	NaN		1.33634	+	1.37282	+	2	1.35458
B4E240;Q92575;B3KTD5;F8WB86;Q6PJ80;C9JLR4	UBX domain-containing protein 4	UBXN4	>tr|B4E240|B4E240_HUMAN cDNA FLJ58827, highly similar to UBX domain-containing protein 2 OS=Homo sapiens PE=2 SV=1;>sp|Q92575|UBXN4_HUMAN UBX domain-containing protein 4 OS=Homo sapiens GN=UBXN4 PE=1 SV=2;>tr|B3KTD5|B3KTD5_HUMAN cDNA FLJ38083 fis, clone CT	0.74634	6	0.71527	0.76399	NaN	1.39807	+	1.30892	+	NaN		2	1.3535
Q8IZ40;F1T0J8	REST corepressor 2	RCOR2	>sp|Q8IZ40|RCOR2_HUMAN REST corepressor 2 OS=Homo sapiens GN=RCOR2 PE=1 SV=2;>tr|F1T0J8|F1T0J8_HUMAN REST corepressor 2 OS=Homo sapiens GN=RCOR2 PE=2 SV=1	0.74752	8	0.72123	0.74752	NaN	1.38652	+	1.33776	+	NaN		2	1.36214
Q07812-5;Q07812-7;Q07812-8;Q07812;Q07812-2;K4JQN1;Q5ZPJ1;Q07812-6;I6LPK7	Apoptosis regulator BAX	BAX	>sp|Q07812-5|BAX_HUMAN Isoform Epsilon of Apoptosis regulator BAX OS=Homo sapiens GN=BAX;>sp|Q07812-7|BAX_HUMAN Isoform Psi of Apoptosis regulator BAX OS=Homo sapiens GN=BAX;>sp|Q07812-8|BAX_HUMAN Isoform Sigma of Apoptosis regulator BAX OS=Homo sapiens GN	0.75063	9	0.71308	0.75806	0.78342	1.40237	+	1.31916	+	1.27645		2	1.31916
Q86UP2;A0A024R663;Q86UP2-4;Q86UP2-2;Q86UP2-3;G3V4Y7;B7Z6P3;H0YJZ8;G3V5G2;B3KWP6;G3V5P0;H0YJV5;Q6PDF7;Q3SWV9;H0YJP2;C9JKX0;G8JLP4;Q9Y4F3-3;Q9Y4F3-4;Q9Y4F3-5;Q9Y4F3	Kinectin	KTN1	>sp|Q86UP2|KTN1_HUMAN Kinectin OS=Homo sapiens GN=KTN1 PE=1 SV=1;>tr|A0A024R663|A0A024R663_HUMAN Kinectin 1 (Kinesin receptor), isoform CRA_a OS=Homo sapiens GN=KTN1 PE=4 SV=1;>sp|Q86UP2-4|KTN1_HUMAN Isoform 4 of Kinectin OS=Homo sapiens GN=KTN1;>sp|Q86UP2	0.75171	62	0.74156	0.79039	0.73659	1.34851	+	1.2652		1.35761	+	2	1.34851
J3QK86;J3KPG5;Q9UIF9-2;Q9UIF9-3;F8VU39;Q9UIF9;H0YHL2;H0YII3	Bromodomain adjacent to zinc finger domain protein 2A	BAZ2A	>tr|J3QK86|J3QK86_HUMAN Bromodomain adjacent to zinc finger domain protein 2A OS=Homo sapiens GN=BAZ2A PE=1 SV=1;>tr|J3KPG5|J3KPG5_HUMAN Bromodomain adjacent to zinc finger domain protein 2A OS=Homo sapiens GN=BAZ2A PE=1 SV=1;>sp|Q9UIF9-2|BAZ2A_HUMAN Isofo	0.75513	4	0.5844	0.75385	NaN	1.71116	+	1.32652	+	NaN		2	1.51884
Q9H3Q1;B2R6D8;Q9H3Q1-2;J3KRZ9;J3QQS6;J3QR93	Cdc42 effector protein 4	CDC42EP4	>sp|Q9H3Q1|BORG4_HUMAN Cdc42 effector protein 4 OS=Homo sapiens GN=CDC42EP4 PE=1 SV=1;>tr|B2R6D8|B2R6D8_HUMAN CDC42 effector protein (Rho GTPase binding) 4, isoform CRA_a OS=Homo sapiens GN=CDC42EP4 PE=2 SV=1;>sp|Q9H3Q1-2|BORG4_HUMAN Isoform 2 of Cdc42 eff	0.758	14	0.77925	0.763	0.7044	1.28329		1.31062	+	1.41965	+	2	1.31062
Q99570;B2RAJ6;A0JP11;D6RJ98;D6RAC3;D6RBB7	Phosphoinositide 3-kinase regulatory subunit 4	PIK3R4	>sp|Q99570|PI3R4_HUMAN Phosphoinositide 3-kinase regulatory subunit 4 OS=Homo sapiens GN=PIK3R4 PE=1 SV=3;>tr|B2RAJ6|B2RAJ6_HUMAN cDNA, FLJ94957, highly similar to Homo sapiens phosphoinositide-3-kinase, regulatory subunit 4, p150 (PIK3R4), mRNA OS=Homo sa	0.75838	7	0.7808	0.7538	0.69551	1.28074		1.32661	+	1.43779	+	2	1.32661
Q92896;Q92896-3;Q92896-2;H3BM42;Q6ZMF1;H3BRD8;H3BQU9	Golgi apparatus protein 1	GLG1	>sp|Q92896|GSLG1_HUMAN Golgi apparatus protein 1 OS=Homo sapiens GN=GLG1 PE=1 SV=2;>sp|Q92896-3|GSLG1_HUMAN Isoform 3 of Golgi apparatus protein 1 OS=Homo sapiens GN=GLG1;>sp|Q92896-2|GSLG1_HUMAN Isoform 2 of Golgi apparatus protein 1 OS=Homo sapiens GN=GL	0.75983	16	0.69687	0.8977	0.75021	1.43499	+	1.11396		1.33296	+	2	1.33296
P25440-4;X5CF57;P25440-3;P25440;A0A024RCR5;H0Y6K2;P25440-2;U3KQA6;H0Y799;E9PIQ3	Bromodomain-containing protein 2	BRD2	>sp|P25440-4|BRD2_HUMAN Isoform 4 of Bromodomain-containing protein 2 OS=Homo sapiens GN=BRD2;>tr|X5CF57|X5CF57_HUMAN BRD2 OS=Homo sapiens GN=BRD2 PE=4 SV=1;>sp|P25440-3|BRD2_HUMAN Isoform 3 of Bromodomain-containing protein 2 OS=Homo sapiens GN=BRD2;>sp|P	0.76014	6	0.67369	0.74794	0.81656	1.48436	+	1.33701	+	1.22465		2	1.33701
Q6P452;P09525;V9HW59;Q6LES2;Q59FK3;B4DDF9;B4DDZ4;B4DE02;B4E1S2;Q6MZI0	Annexin;Annexin A4	ANXA4	>tr|Q6P452|Q6P452_HUMAN Annexin OS=Homo sapiens GN=ANXA4 PE=1 SV=1;>sp|P09525|ANXA4_HUMAN Annexin A4 OS=Homo sapiens GN=ANXA4 PE=1 SV=4;>tr|V9HW59|V9HW59_HUMAN Annexin OS=Homo sapiens GN=HEL-S-274 PE=2 SV=1;>tr|Q6LES2|Q6LES2_HUMAN Annexin (Fragment) OS=Hom	0.77224	6	0.74563	9.8402	0.79188	1.34115	+	0.101624	+	1.26282		2	1.26282
Q96I59;B3KPX5;Q9H5H1;Q96I59-2;B2RD66;H0YE96;H0YEL9;E9PRK2	Probable asparagine--tRNA ligase, mitochondrial	NARS2	>sp|Q96I59|SYNM_HUMAN Probable asparagine--tRNA ligase, mitochondrial OS=Homo sapiens GN=NARS2 PE=1 SV=3;>tr|B3KPX5|B3KPX5_HUMAN cDNA FLJ32418 fis, clone SKMUS2000863, weakly similar to PROBABLE ASPARAGINYL-TRNA SYNTHETASE (EC 6.1.1.22) OS=Homo sapiens PE=	0.77346	6	0.7239	0.63501	0.83812	1.38141	+	1.57478	+	1.19315		2	1.38141
P31937;A0A024RA75;H7BZL2	3-hydroxyisobutyrate dehydrogenase, mitochondrial	HIBADH	>sp|P31937|3HIDH_HUMAN 3-hydroxyisobutyrate dehydrogenase, mitochondrial OS=Homo sapiens GN=HIBADH PE=1 SV=2;>tr|A0A024RA75|A0A024RA75_HUMAN 3-hydroxyisobutyrate dehydrogenase, isoform CRA_a OS=Homo sapiens GN=HIBADH PE=4 SV=1	0.77467	19	0.73413	0.82477	0.74915	1.36216	+	1.21246		1.33485	+	2	1.33485
G3V3Y1;V9HW32;Q8N8N7;G3V288;Q8N8N7-2;G3V2R9	Prostaglandin reductase 2	PTGR2	>tr|G3V3Y1|G3V3Y1_HUMAN Prostaglandin reductase 2 OS=Homo sapiens GN=PTGR2 PE=4 SV=1;>tr|V9HW32|V9HW32_HUMAN Epididymis secretory protein Li 298 OS=Homo sapiens GN=HEL-S-298 PE=2 SV=1;>sp|Q8N8N7|PTGR2_HUMAN Prostaglandin reductase 2 OS=Homo sapiens GN=PTGR	0.77793	10	0.74439	0.74571	0.97311	1.34338	+	1.341	+	1.02763		2	1.341
Q59GQ7;Q14527;A8K5B6;H7C5K0;Q14527-2;Q05DQ5;Q05DF7;Q05BZ6	Helicase-like transcription factor	HLTF	>tr|Q59GQ7|Q59GQ7_HUMAN SWI/SNF-related matrix-associated actin-dependent regulator of chromatin a3 variant (Fragment) OS=Homo sapiens PE=2 SV=1;>sp|Q14527|HLTF_HUMAN Helicase-like transcription factor OS=Homo sapiens GN=HLTF PE=1 SV=2;>tr|A8K5B6|A8K5B6_HU	0.80632	6	0.73836	0.74617	0.90829	1.35435	+	1.34018	+	1.10097		2	1.34018
Q15526-2;Q15526;E5KRX5	Surfeit locus protein 1	SURF1	>sp|Q15526-2|SURF1_HUMAN Isoform 2 of Surfeit locus protein 1 OS=Homo sapiens GN=SURF1;>sp|Q15526|SURF1_HUMAN Surfeit locus protein 1 OS=Homo sapiens GN=SURF1 PE=1 SV=1;>tr|E5KRX5|E5KRX5_HUMAN Surfeit locus protein 1 OS=Homo sapiens PE=4 SV=1	0.81261	3	NaN	0.5255	0.73752	NaN		1.90295	+	1.3559	+	2	1.62942
B4DYQ3;Q7Z3Z5;Q93074-3;Q93074;Q93074-2	Mediator of RNA polymerase II transcription subunit 12	MED12	>tr|B4DYQ3|B4DYQ3_HUMAN cDNA FLJ60974, highly similar to Mediator of RNA polymerase II transcription subunit 12 OS=Homo sapiens PE=2 SV=1;>tr|Q7Z3Z5|Q7Z3Z5_HUMAN Mediator of RNA polymerase II transcription, subunit 12 homolog (Yeast), isoform CRA_e OS=Homo	0.83121	5	1.5288	0.65299	0.8598	0.654108	+	1.53142	+	1.16306		2	1.16306
Q8IZT6-2;Q8IZT6;B3KWI2;Q5VYL4;Q4G1H2;Q4G1H0	Abnormal spindle-like microcephaly-associated protein	ASPM	>sp|Q8IZT6-2|ASPM_HUMAN Isoform 2 of Abnormal spindle-like microcephaly-associated protein OS=Homo sapiens GN=ASPM;>sp|Q8IZT6|ASPM_HUMAN Abnormal spindle-like microcephaly-associated protein OS=Homo sapiens GN=ASPM PE=1 SV=2;>tr|B3KWI2|B3KWI2_HUMAN cDNA FL	0.83826	8	0.98733	0.71268	0.73935	1.01283		1.40315	+	1.35254	+	2	1.35254
Q9BQ61;K7ELS0;K7ERU7;K7EN60;B2RE11	Uncharacterized protein C19orf43	C19orf43	>sp|Q9BQ61|CS043_HUMAN Uncharacterized protein C19orf43 OS=Homo sapiens GN=C19orf43 PE=1 SV=1;>tr|K7ELS0|K7ELS0_HUMAN Uncharacterized protein C19orf43 OS=Homo sapiens GN=C19orf43 PE=1 SV=1;>tr|K7ERU7|K7ERU7_HUMAN Uncharacterized protein C19orf43 OS=Homo sa	0.84052	8	0.49565	1.0541	0.7441	2.01755	+	0.948677		1.34391	+	2	1.34391
H7C1U8;C9J574;Q9BUR5-2;Q9BUR5;G3V1B6	Apolipoprotein O	APOO	>tr|H7C1U8|H7C1U8_HUMAN Apolipoprotein O (Fragment) OS=Homo sapiens GN=APOO PE=1 SV=1;>tr|C9J574|C9J574_HUMAN Apolipoprotein O OS=Homo sapiens GN=APOO PE=1 SV=1;>sp|Q9BUR5-2|APOO_HUMAN Isoform 2 of Apolipoprotein O OS=Homo sapiens GN=APOO;>sp|Q9BUR5|APOO_H	0.84328	3	0.55645	0.71383	0.86845	1.79711	+	1.40089	+	1.15148		2	1.40089
E9PEI0;A8K8Z0;Q69YH5;B3KRS8;B7Z5Q5	Cell division cycle-associated protein 2	CDCA2	>tr|E9PEI0|E9PEI0_HUMAN Cell division cycle-associated protein 2 OS=Homo sapiens GN=CDCA2 PE=1 SV=1;>tr|A8K8Z0|A8K8Z0_HUMAN cDNA FLJ78763 OS=Homo sapiens PE=2 SV=1;>sp|Q69YH5|CDCA2_HUMAN Cell division cycle-associated protein 2 OS=Homo sapiens GN=CDCA2 PE=	0.85395	4	0.62919	0.74183	NaN	1.58935	+	1.34802	+	NaN		2	1.46868
Q8IWT0-2;Q8IWT0;D3DPQ2;H7C3R6;A8K0B5	Protein archease	ZBTB8OS	>sp|Q8IWT0-2|ARCH_HUMAN Isoform 2 of Protein archease OS=Homo sapiens GN=ZBTB8OS;>sp|Q8IWT0|ARCH_HUMAN Protein archease OS=Homo sapiens GN=ZBTB8OS PE=1 SV=2;>tr|D3DPQ2|D3DPQ2_HUMAN Zinc finger and BTB domain containing 8 opposite strand, isoform CRA_b OS=H	0.88147	7	0.9137	0.58858	0.57598	1.09445		1.699	+	1.73617	+	2	1.699
Q8N730;B1AH87;Q13850;P30536	Translocator protein	PBR;TSPO	>tr|Q8N730|Q8N730_HUMAN Peripheral-type Benzodiazepine Receptor (Fragment) OS=Homo sapiens GN=PBR PE=4 SV=1;>tr|B1AH87|B1AH87_HUMAN Putative peripheral benzodiazepine receptor-related protein (Fragment) OS=Homo sapiens GN=TSPO PE=1 SV=1;>tr|Q13850|Q13850_H	0.89706	5	0.89706	0.56752	0.43823	1.11475		1.76205	+	2.28191	+	2	1.76205
B4DFG6;Q9Y676;B0S7P4	28S ribosomal protein S18b, mitochondrial	MRPS18B	>tr|B4DFG6|B4DFG6_HUMAN 28S ribosomal protein S18b, mitochondrial OS=Homo sapiens GN=MRPS18B PE=1 SV=1;>sp|Q9Y676|RT18B_HUMAN 28S ribosomal protein S18b, mitochondrial OS=Homo sapiens GN=MRPS18B PE=1 SV=1;>tr|B0S7P4|B0S7P4_HUMAN cDNA, FLJ92156, Homo sapien	0.90533	7	0.74546	0.60714	1.0104	1.34145	+	1.64707	+	0.989707		2	1.34145
Q96Q15-4;Q96Q15-3;Q96Q15-2;J3KRA9;Q96Q15;I3L0C1	Serine/threonine-protein kinase SMG1	SMG1	>sp|Q96Q15-4|SMG1_HUMAN Isoform 4 of Serine/threonine-protein kinase SMG1 OS=Homo sapiens GN=SMG1;>sp|Q96Q15-3|SMG1_HUMAN Isoform 3 of Serine/threonine-protein kinase SMG1 OS=Homo sapiens GN=SMG1;>sp|Q96Q15-2|SMG1_HUMAN Isoform 2 of Serine/threonine-protei	0.92819	4	0.90811	1.3594	0.6544	1.10119		0.735619	+	1.52812	+	2	1.10119
E9PCG9;Q02338;H7C2W1;C9K0G7;A1E284;C9JM78;C9JQ90	D-beta-hydroxybutyrate dehydrogenase, mitochondrial	BDH1	>tr|E9PCG9|E9PCG9_HUMAN D-beta-hydroxybutyrate dehydrogenase, mitochondrial OS=Homo sapiens GN=BDH1 PE=3 SV=1;>sp|Q02338|BDH_HUMAN D-beta-hydroxybutyrate dehydrogenase, mitochondrial OS=Homo sapiens GN=BDH1 PE=1 SV=3;>tr|H7C2W1|H7C2W1_HUMAN D-beta-hydroxyb	0.99586	3	0.67304	0.75556	NaN	1.4858	+	1.32352	+	NaN		2	1.40466
Q59FT7;Q15750-2;Q15750;A8K6K3;B7Z9N9;B7Z3S5	TGF-beta-activated kinase 1 and MAP3K7-binding protein 1	TAB1;MAP3K7IP1	>tr|Q59FT7|Q59FT7_HUMAN Mitogen-activated protein kinase kinase kinase 7 interacting protein 1 isoform alpha variant (Fragment) OS=Homo sapiens PE=2 SV=1;>sp|Q15750-2|TAB1_HUMAN Isoform 2 of TGF-beta-activated kinase 1 and MAP3K7-binding protein 1 OS=Homo	1.0306	6	1.542	1.0339	1.3678	0.648508	+	0.967212		0.731101	+	2	0.731101
P61964	WD repeat-containing protein 5	WDR5	>sp|P61964|WDR5_HUMAN WD repeat-containing protein 5 OS=Homo sapiens GN=WDR5 PE=1 SV=1	1.0328	4	0.74099	0.66256	0.89469	1.34955	+	1.5093	+	1.11771		2	1.34955
Q5VW36;B3KNV9;S4R400	Focadhesin	FOCAD	>sp|Q5VW36|FOCAD_HUMAN Focadhesin OS=Homo sapiens GN=FOCAD PE=1 SV=1;>tr|B3KNV9|B3KNV9_HUMAN cDNA FLJ30554 fis, clone BRAWH2003693 OS=Homo sapiens PE=2 SV=1;>tr|S4R400|S4R400_HUMAN Focadhesin OS=Homo sapiens GN=FOCAD PE=1 SV=1	1.0495	4	1.4489	2.1802	NaN	0.690179	+	0.458674	+	NaN		2	0.574426
Q92820;A8K335;B4DVI2	Gamma-glutamyl hydrolase	GGH	>sp|Q92820|GGH_HUMAN Gamma-glutamyl hydrolase OS=Homo sapiens GN=GGH PE=1 SV=2;>tr|A8K335|A8K335_HUMAN cDNA FLJ76254, highly similar to Homo sapiens gamma-glutamyl hydrolase (GGH), mRNA OS=Homo sapiens PE=2 SV=1	1.0529	7	1.5305	1.5821	1.0414	0.653381	+	0.632071	+	0.960246		2	0.653381
E7EMF1;E7ESP4;P17301;F1C627;E9PB77	Integrin alpha-2	ITGA2	>tr|E7EMF1|E7EMF1_HUMAN Integrin alpha-2 OS=Homo sapiens GN=ITGA2 PE=1 SV=1;>tr|E7ESP4|E7ESP4_HUMAN Integrin alpha-2 OS=Homo sapiens GN=ITGA2 PE=1 SV=1;>sp|P17301|ITA2_HUMAN Integrin alpha-2 OS=Homo sapiens GN=ITGA2 PE=1 SV=1;>tr|F1C627|F1C627_HUMAN Platel	1.1398	5	NaN	1.4305	1.7768	NaN		0.699056	+	0.56281	+	2	0.630933
E7EST9;B5MEG5;O94966-7;O94966-6;O94966-5;O94966-4;O94966-3;O94966;A0A024R2T9;A5PL36;O94966-2;E7ESU0;B4DK86	Ubiquitin carboxyl-terminal hydrolase;Ubiquitin carboxyl-terminal hydrolase 19	USP19	>tr|E7EST9|E7EST9_HUMAN Ubiquitin carboxyl-terminal hydrolase OS=Homo sapiens GN=USP19 PE=1 SV=1;>tr|B5MEG5|B5MEG5_HUMAN Ubiquitin carboxyl-terminal hydrolase OS=Homo sapiens GN=USP19 PE=1 SV=1;>sp|O94966-7|UBP19_HUMAN Isoform 7 of Ubiquitin carboxyl-termi	1.1404	3	0.56031	0.74695	0.86045	1.78473	+	1.33878	+	1.16218		2	1.33878
B7Z3K3;G3V1R9;B3KSG0;Q9NPH2-2;Q9NPH2-3;Q9NPH2;J3QS51;J3KRH4	Inositol-3-phosphate synthase 1	ISYNA1	>tr|B7Z3K3|B7Z3K3_HUMAN Inositol-3-phosphate synthase 1 OS=Homo sapiens GN=ISYNA1 PE=1 SV=1;>tr|G3V1R9|G3V1R9_HUMAN Inositol-3-phosphate synthase 1 OS=Homo sapiens GN=ISYNA1 PE=1 SV=1;>tr|B3KSG0|B3KSG0_HUMAN cDNA FLJ36142 fis, clone TESTI2025006, highly si	1.1461	11	1.746	1.826	NaN	0.572738	+	0.547645	+	NaN		2	0.560191
Q9NR33	DNA polymerase epsilon subunit 4	POLE4	>sp|Q9NR33|DPOE4_HUMAN DNA polymerase epsilon subunit 4 OS=Homo sapiens GN=POLE4 PE=1 SV=2	1.1615	3	1.6385	1.5562	1.0371	0.610314	+	0.642591	+	0.964227		2	0.642591
Q15042;B9A6J2;Q15042-3;Q15042-4;D3DP75;C9J1R5	Rab3 GTPase-activating protein catalytic subunit	RAB3GAP1	>sp|Q15042|RB3GP_HUMAN Rab3 GTPase-activating protein catalytic subunit OS=Homo sapiens GN=RAB3GAP1 PE=1 SV=3;>tr|B9A6J2|B9A6J2_HUMAN RAB3 GTPase activating protein subunit 1 OS=Homo sapiens GN=RAB3GAP1 PE=2 SV=1;>sp|Q15042-3|RB3GP_HUMAN Isoform 2 of Rab3	1.1899	9	1.6131	1.4063	1.0765	0.619924	+	0.711086	+	0.928936		2	0.711086
Q9Y371;Q9Y371-2;Q9Y371-3	Endophilin-B1	SH3GLB1	>sp|Q9Y371|SHLB1_HUMAN Endophilin-B1 OS=Homo sapiens GN=SH3GLB1 PE=1 SV=1;>sp|Q9Y371-2|SHLB1_HUMAN Isoform 2 of Endophilin-B1 OS=Homo sapiens GN=SH3GLB1;>sp|Q9Y371-3|SHLB1_HUMAN Isoform 3 of Endophilin-B1 OS=Homo sapiens GN=SH3GLB1	1.2285	5	1.1405	1.4474	1.5971	0.876808		0.690894	+	0.626135	+	2	0.690894
Q9H4L7;Q9H4L7-2;Q9H4L7-3;D6RAY8	SWI/SNF-related matrix-associated actin-dependent regulator of chromatin subfamily A containing DEAD/H box 1	SMARCAD1	>sp|Q9H4L7|SMRCD_HUMAN SWI/SNF-related matrix-associated actin-dependent regulator of chromatin subfamily A containing DEAD/H box 1 OS=Homo sapiens GN=SMARCAD1 PE=1 SV=2;>sp|Q9H4L7-2|SMRCD_HUMAN Isoform 2 of SWI/SNF-related matrix-associated actin-dependen	1.2874	10	1.2619	1.5813	1.4624	0.792456		0.632391	+	0.683807	+	2	0.683807
B4DT61;E7ESK6;E9PBI9;B7Z5H2;B4DQ56;P34741;A0A024R9D1;E5RJB8;E5RHU3	Syndecan;Syndecan-2	SDC2	>tr|B4DT61|B4DT61_HUMAN Syndecan OS=Homo sapiens PE=2 SV=1;>tr|E7ESK6|E7ESK6_HUMAN Syndecan OS=Homo sapiens GN=SDC2 PE=1 SV=1;>tr|E9PBI9|E9PBI9_HUMAN Syndecan OS=Homo sapiens GN=SDC2 PE=1 SV=1;>tr|B7Z5H2|B7Z5H2_HUMAN Syndecan OS=Homo sapiens PE=2 SV=1;>tr|	1.3155	8	1.3233	1.3474	1.5376	0.755687		0.74217	+	0.650364	+	2	0.74217
Q8IW50-3;Q8IW50-2;Q8IW50-5;Q8IW50-6;Q5T593;Q8IW50-4;Q8IW50	Protein FAM219A	FAM219A	>sp|Q8IW50-3|F219A_HUMAN Isoform 3 of Protein FAM219A OS=Homo sapiens GN=FAM219A;>sp|Q8IW50-2|F219A_HUMAN Isoform 2 of Protein FAM219A OS=Homo sapiens GN=FAM219A;>sp|Q8IW50-5|F219A_HUMAN Isoform 5 of Protein FAM219A OS=Homo sapiens GN=FAM219A;>sp|Q8IW50-6|	1.3326	3	NaN	1.5151	1.3873	NaN		0.660022	+	0.720825	+	2	0.690424
Q9GZR2;B4E331;B4DJ95;Q9GZR2-2	RNA exonuclease 4	REXO4	>sp|Q9GZR2|REXO4_HUMAN RNA exonuclease 4 OS=Homo sapiens GN=REXO4 PE=1 SV=2;>tr|B4E331|B4E331_HUMAN cDNA FLJ50372, highly similar to RNA exonuclease 4 (EC 3.1.-.-) OS=Homo sapiens PE=2 SV=1;>tr|B4DJ95|B4DJ95_HUMAN cDNA FLJ55848, highly similar to RNA exonu	1.3409	4	1.2543	1.7199	1.4044	0.797257		0.581429	+	0.712048	+	2	0.712048
Q9H4G0-2;B7Z653;Q9H4G0;Q9H4G0-3;B3KUB6;Q9H4G0-4;Q4VXN0;Q4VXN1;Q4VXN5;Q4VXN6;Q4VXN2;Q4VXN7;X6RC15;H7C2K6;Q7Z3C9	Band 4.1-like protein 1	EPB41L1	>sp|Q9H4G0-2|E41L1_HUMAN Isoform 2 of Band 4.1-like protein 1 OS=Homo sapiens GN=EPB41L1;>tr|B7Z653|B7Z653_HUMAN cDNA FLJ61657, highly similar to Band 4.1-like protein 1 OS=Homo sapiens PE=2 SV=1;>sp|Q9H4G0|E41L1_HUMAN Band 4.1-like protein 1 OS=Homo sapie	1.3472	13	1.3706	1.4267	1.266	0.729607	+	0.700918	+	0.789889		2	0.729607
Q96FC7;A0A024QZK4;Q96FC7-2;Q96FC7-3;E5RHN5;Q92561	Phytanoyl-CoA hydroxylase-interacting protein-like	PHYHIPL	>sp|Q96FC7|PHIPL_HUMAN Phytanoyl-CoA hydroxylase-interacting protein-like OS=Homo sapiens GN=PHYHIPL PE=1 SV=3;>tr|A0A024QZK4|A0A024QZK4_HUMAN Phytanoyl-CoA 2-hydroxylase interacting protein-like, isoform CRA_b OS=Homo sapiens GN=PHYHIPL PE=4 SV=1;>sp|Q96F	1.3475	17	1.1853	1.3944	1.372	0.843668		0.717154	+	0.728863	+	2	0.728863
Q15075;A8K7J3	Early endosome antigen 1	EEA1	>sp|Q15075|EEA1_HUMAN Early endosome antigen 1 OS=Homo sapiens GN=EEA1 PE=1 SV=2;>tr|A8K7J3|A8K7J3_HUMAN cDNA FLJ75535, highly similar to Homo sapiens early endosome antigen 1, 162kD (EEA1), mRNA (Fragment) OS=Homo sapiens PE=2 SV=1	1.3483	5	1.4491	NaN	1.601	0.690084	+	NaN		0.62461	+	2	0.657347
G5E9Z2;Q96KA5-2;Q96KA5;B3KY18	Cleft lip and palate transmembrane protein 1-like protein	CLPTM1L	>tr|G5E9Z2|G5E9Z2_HUMAN Cisplatin resistance related protein CRR9p, isoform CRA_c OS=Homo sapiens GN=CLPTM1L PE=1 SV=1;>sp|Q96KA5-2|CLP1L_HUMAN Isoform 2 of Cleft lip and palate transmembrane protein 1-like protein OS=Homo sapiens GN=CLPTM1L;>sp|Q96KA5|CLP	1.366	4	1.5216	NaN	1.4098	0.657203	+	NaN		0.70932	+	2	0.683262
Q99584;D3DV53	Protein S100-A13	S100A13	>sp|Q99584|S10AD_HUMAN Protein S100-A13 OS=Homo sapiens GN=S100A13 PE=1 SV=1;>tr|D3DV53|D3DV53_HUMAN S100 calcium binding protein A13, isoform CRA_a (Fragment) OS=Homo sapiens GN=S100A13 PE=4 SV=1	1.3707	9	1.3223	1.3707	1.434	0.756258		0.729554	+	0.69735	+	2	0.729554
P19367-4;B4DG62;P19367-2;P19367;A8K7J7;P19367-3;A0A024QZK7;Q59FD4;E7ENR4;B3KXY9;B3KRA9;B1AR63;B1AR62;B1AR61;Q2TB90;B3KT70;A8K4Q9;B4E0J9	Hexokinase-1	HK1	>sp|P19367-4|HXK1_HUMAN Isoform 4 of Hexokinase-1 OS=Homo sapiens GN=HK1;>tr|B4DG62|B4DG62_HUMAN cDNA FLJ56506, highly similar to Hexokinase-1 (EC 2.7.1.1) OS=Homo sapiens PE=2 SV=1;>sp|P19367-2|HXK1_HUMAN Isoform 2 of Hexokinase-1 OS=Homo sapiens GN=HK1;>	1.3712	92	1.3784	1.3841	1.3533	0.725479	+	0.722491	+	0.738934		2	0.725479
Q13740-2;Q13740;F5GXJ9;B3KNN9;B4DX43;H7C543;Q13740-3	CD166 antigen	ALCAM	>sp|Q13740-2|CD166_HUMAN Isoform 2 of CD166 antigen OS=Homo sapiens GN=ALCAM;>sp|Q13740|CD166_HUMAN CD166 antigen OS=Homo sapiens GN=ALCAM PE=1 SV=2;>tr|F5GXJ9|F5GXJ9_HUMAN CD166 antigen OS=Homo sapiens GN=ALCAM PE=1 SV=1;>tr|B3KNN9|B3KNN9_HUMAN cDNA FLJ30	1.3748	24	1.484	1.4082	1.3425	0.673854	+	0.710126	+	0.744879		2	0.710126
P31689;P31689-2;B7Z5C0;Q9NXZ8	DnaJ homolog subfamily A member 1	DNAJA1;HDJ2	>sp|P31689|DNJA1_HUMAN DnaJ homolog subfamily A member 1 OS=Homo sapiens GN=DNAJA1 PE=1 SV=2;>sp|P31689-2|DNJA1_HUMAN Isoform 2 of DnaJ homolog subfamily A member 1 OS=Homo sapiens GN=DNAJA1;>tr|B7Z5C0|B7Z5C0_HUMAN DnaJ homolog subfamily A member 1 OS=Homo	1.3775	31	1.4306	1.3412	1.2981	0.699007	+	0.745601	+	0.770357		2	0.745601
P04179-4;Q7Z7M4;P04179;F5H3C5;P04179-3;P04179-2;F5H4R2;F5GYZ5;Q7Z7M6;Q4ZJI1;Q7Z7M7;G8JLJ2;Q7Z7M5	Superoxide dismutase [Mn], mitochondrial;Superoxide dismutase	SOD2	>sp|P04179-4|SODM_HUMAN Isoform 4 of Superoxide dismutase [Mn], mitochondrial OS=Homo sapiens GN=SOD2;>tr|Q7Z7M4|Q7Z7M4_HUMAN Superoxide dismutase (Fragment) OS=Homo sapiens GN=SOD2 PE=2 SV=1;>sp|P04179|SODM_HUMAN Superoxide dismutase [Mn], mitochondrial O	1.3849	5	1.6552	1.3849	1.2398	0.604157	+	0.722074	+	0.806582		2	0.722074
O95248;G5E933;O95248-4;A0A024R4Z9;Q6PGN5;H0Y5W8;Q68CX1;Q59EX9;Q86TK5	Myotubularin-related protein 5	SBF1;DKFZp761D0422	>sp|O95248|MTMR5_HUMAN Myotubularin-related protein 5 OS=Homo sapiens GN=SBF1 PE=1 SV=3;>tr|G5E933|G5E933_HUMAN Myotubularin-related protein 5 OS=Homo sapiens GN=SBF1 PE=1 SV=1;>sp|O95248-4|MTMR5_HUMAN Isoform 4 of Myotubularin-related protein 5 OS=Homo sa	1.3946	4	2.0059	0.89552	2.1148	0.498529	+	1.11667		0.472858	+	2	0.498529
B3KSG3;O14639-2;F8W8M4;B3KVH2;O14639;Q5T6N4;O14639-4;O14639-3;O14639-5;J3QSX6;Q5JVV3;B7Z4H1;H0Y3K7;Q5T6N2;B4DQA3;H0Y7N6;F6XFR5	Actin-binding LIM protein 1	ABLIM1	>tr|B3KSG3|B3KSG3_HUMAN cDNA FLJ36152 fis, clone TESTI2025403, highly similar to Actin-binding LIM protein 1 OS=Homo sapiens PE=2 SV=1;>sp|O14639-2|ABLM1_HUMAN Isoform 2 of Actin-binding LIM protein 1 OS=Homo sapiens GN=ABLIM1;>tr|F8W8M4|F8W8M4_HUMAN Actin	1.415	9	1.415	1.5019	1.256	0.706714	+	0.665823	+	0.796178		2	0.706714
P35754;A0A024RAM2;D3DQK5	Glutaredoxin-1	GLRX;hCG_1979388	>sp|P35754|GLRX1_HUMAN Glutaredoxin-1 OS=Homo sapiens GN=GLRX PE=1 SV=2;>tr|A0A024RAM2|A0A024RAM2_HUMAN Glutaredoxin (Thioltransferase), isoform CRA_c OS=Homo sapiens GN=GLRX PE=4 SV=1;>tr|D3DQK5|D3DQK5_HUMAN HCG1979388, isoform CRA_a OS=Homo sapiens GN=hC	1.4158	5	1.9457	1.33	NaN	0.513954	+	0.75188	+	NaN		2	0.632917
Q05CP8;Q16204;A0A024QZJ7	Coiled-coil domain-containing protein 6	CCDC6	>tr|Q05CP8|Q05CP8_HUMAN CCDC6 protein (Fragment) OS=Homo sapiens GN=CCDC6 PE=2 SV=1;>sp|Q16204|CCDC6_HUMAN Coiled-coil domain-containing protein 6 OS=Homo sapiens GN=CCDC6 PE=1 SV=2;>tr|A0A024QZJ7|A0A024QZJ7_HUMAN Coiled-coil domain containing 6, isoform C	1.4261	18	1.3085	1.4261	1.448	0.764234		0.701213	+	0.690608	+	2	0.701213
P21579;A0A024RBE9;J3KQA0;H0YIH4;A4FU00;Q8N9I0;A0A024R9B3;K7EJS7;C9JX50;Q05BS5;B7Z300;Q4FD32;O00445;A0A024R4N8	Synaptotagmin-1	SYT1	>sp|P21579|SYT1_HUMAN Synaptotagmin-1 OS=Homo sapiens GN=SYT1 PE=1 SV=1;>tr|A0A024RBE9|A0A024RBE9_HUMAN Synaptotagmin I, isoform CRA_a OS=Homo sapiens GN=SYT1 PE=4 SV=1;>tr|J3KQA0|J3KQA0_HUMAN Synaptotagmin I, isoform CRA_b OS=Homo sapiens GN=SYT1 PE=1 SV=	1.4339	13	1.2504	1.5613	1.4339	0.799744		0.640492	+	0.697399	+	2	0.697399
Q7Z531;Q9UIJ7;Q7Z4Y4;B3KWD9;Q9UIJ7-2;Q9UIJ7-3	GTP:AMP phosphotransferase AK3, mitochondrial	AK3	>tr|Q7Z531|Q7Z531_HUMAN GTP:AMP phosphotransferase AK3, mitochondrial OS=Homo sapiens GN=AK3 PE=2 SV=1;>sp|Q9UIJ7|KAD3_HUMAN GTP:AMP phosphotransferase AK3, mitochondrial OS=Homo sapiens GN=AK3 PE=1 SV=4;>tr|Q7Z4Y4|Q7Z4Y4_HUMAN GTP:AMP phosphotransferase A	1.4374	15	1.4248	1.0866	2.0251	0.701853	+	0.920302		0.493803	+	2	0.701853
Q7L4Q3;P07203;Q6NSD4;P07203-2	Glutathione peroxidase;Glutathione peroxidase 1	GPX1	>tr|Q7L4Q3|Q7L4Q3_HUMAN Glutathione peroxidase OS=Homo sapiens GN=GPX1 PE=2 SV=1;>sp|P07203|GPX1_HUMAN Glutathione peroxidase 1 OS=Homo sapiens GN=GPX1 PE=1 SV=4;>tr|Q6NSD4|Q6NSD4_HUMAN Glutathione peroxidase OS=Homo sapiens GN=GPX1 PE=2 SV=1	1.4394	8	1.6258	1.606	1.2956	0.615082	+	0.622665	+	0.771843		2	0.622665
Q8N442;A0A024R9T3	Translation factor GUF1, mitochondrial	GUF1	>sp|Q8N442|GUF1_HUMAN Translation factor GUF1, mitochondrial OS=Homo sapiens GN=GUF1 PE=1 SV=1;>tr|A0A024R9T3|A0A024R9T3_HUMAN Translation factor GUF1, mitochondrial OS=Homo sapiens GN=GUF1 PE=1 SV=1	1.4441	4	1.774	1.4441	NaN	0.563698	+	0.692473	+	NaN		2	0.628085
Q6FGY1;P37235;O75544;Q68CP5;E9PC71;Q5U068;P84074;P61601;B2RB70;C9JW46;H7BZC1	Hippocalcin-like protein 1	HPCAL1;DKFZp781K1922	>tr|Q6FGY1|Q6FGY1_HUMAN HPCAL1 protein OS=Homo sapiens GN=HPCAL1 PE=2 SV=1;>sp|P37235|HPCL1_HUMAN Hippocalcin-like protein 1 OS=Homo sapiens GN=HPCAL1 PE=1 SV=3;>tr|O75544|O75544_HUMAN BDP-1 protein (Fragment) OS=Homo sapiens PE=2 SV=1;>tr|Q68CP5|Q68CP5_HU	1.4659	17	1.4978	1.4659	1.1714	0.667646	+	0.682175	+	0.853679		2	0.682175
C9J8U3;Q7Z2E3-13;C9JZ40;Q7Z2E3-4;Q7Z2E3-5;F5HRF8;Q7Z2E3-9;Q7Z2E3-10;Q7Z2E3-11;Q7Z2E3-8;Q7Z2E3-7;Q7Z2E3	Aprataxin	APTX	>tr|C9J8U3|C9J8U3_HUMAN Aprataxin (Fragment) OS=Homo sapiens GN=APTX PE=1 SV=1;>sp|Q7Z2E3-13|APTX_HUMAN Isoform 13 of Aprataxin OS=Homo sapiens GN=APTX;>tr|C9JZ40|C9JZ40_HUMAN Aprataxin (Fragment) OS=Homo sapiens GN=APTX PE=1 SV=1;>sp|Q7Z2E3-4|APTX_HUMAN I	1.4725	3	1.4232	NaN	1.6072	0.702642	+	NaN		0.6222	+	2	0.662421
Q9BVL4;Q6ICA4	Selenoprotein O	SELO;dJ402G11.5	>sp|Q9BVL4|SELO_HUMAN Selenoprotein O OS=Homo sapiens GN=SELO PE=2 SV=3;>tr|Q6ICA4|Q6ICA4_HUMAN DJ402G11.5 protein OS=Homo sapiens GN=dJ402G11.5 PE=2 SV=1	1.4797	7	1.4797	1.4423	NaN	0.675813	+	0.693337	+	NaN		2	0.684575
B7Z4L9;Q7Z350;Q9P2N7-2;Q9P2J3;Q5JC44;Q58EZ4;Q9P2N7-3;B7ZB44;Q9P2N7-4;Q9P2N7;Q9P2N7-5;Q96HC9;Q9NW71;Q9H8J3	Kelch-like protein 13;Kelch-like protein 9	DKFZp686L0695;KLHL13;KLHL9	>tr|B7Z4L9|B7Z4L9_HUMAN cDNA FLJ55342, highly similar to Kelch-like protein 13 OS=Homo sapiens PE=2 SV=1;>tr|Q7Z350|Q7Z350_HUMAN Kelch-like protein 9 OS=Homo sapiens GN=DKFZp686L0695 PE=2 SV=1;>sp|Q9P2N7-2|KLH13_HUMAN Isoform 2 of Kelch-like protein 13 OS=	1.4913	5	6.7487	NaN	12.145	0.148177	+	NaN		0.0823384	+	2	0.115258
Q6ICJ4;B5MCL2;Q6IB75;P0CG30;P0CG29;G9J6Q6;G9J6Q5;G9J6Q4;B2R533	Glutathione S-transferase theta-2B;Glutathione S-transferase theta-2	Em:AP000351.3;GSTT2;GSTT2B	>tr|Q6ICJ4|Q6ICJ4_HUMAN Em:AP000351.3 protein OS=Homo sapiens GN=Em:AP000351.3 PE=2 SV=1;>tr|B5MCL2|B5MCL2_HUMAN Glutathione S-transferase theta-2B OS=Homo sapiens GN=GSTT2 PE=4 SV=2;>tr|Q6IB75|Q6IB75_HUMAN GSTT2 protein OS=Homo sapiens GN=GSTT2 PE=2 SV=1;	1.5045	6	1.492	1.0853	1.406	0.670241	+	0.921404		0.711238	+	2	0.711238
A6NDA1;B4DXP4;Q99871-3;Q99871;Q99871-2;B4DJM4	HAUS augmin-like complex subunit 7	HAUS7	>tr|A6NDA1|A6NDA1_HUMAN HAUS augmin-like complex subunit 7 OS=Homo sapiens GN=HAUS7 PE=1 SV=1;>tr|B4DXP4|B4DXP4_HUMAN cDNA FLJ60944, highly similar to Homo sapiens 26S proteasome-associated UCH interacting protein 1 (UIP1), transcript variant 3, mRNA OS=Ho	1.6243	8	1.3422	1.5568	1.733	0.745045		0.642343	+	0.577034	+	2	0.642343
B4DGX2;P48426;Q5JUT3;H7BXS3;B4DH09	Phosphatidylinositol 5-phosphate 4-kinase type-2 alpha	PIP4K2A	>tr|B4DGX2|B4DGX2_HUMAN Phosphatidylinositol 5-phosphate 4-kinase type-2 alpha OS=Homo sapiens GN=PIP4K2A PE=1 SV=1;>sp|P48426|PI42A_HUMAN Phosphatidylinositol 5-phosphate 4-kinase type-2 alpha OS=Homo sapiens GN=PIP4K2A PE=1 SV=2;>tr|Q5JUT3|Q5JUT3_HUMAN P	1.6662	5	1.7815	NaN	1.5258	0.561325	+	NaN		0.655394	+	2	0.608359
P14618-2;A0A024R5Z9;H3BTN5;B4DRT3;Q504U3	Pyruvate kinase PKM;Pyruvate kinase	PKM;PKM2	>sp|P14618-2|KPYM_HUMAN Isoform M1 of Pyruvate kinase PKM OS=Homo sapiens GN=PKM;>tr|A0A024R5Z9|A0A024R5Z9_HUMAN Pyruvate kinase OS=Homo sapiens GN=PKM2 PE=3 SV=1;>tr|H3BTN5|H3BTN5_HUMAN Pyruvate kinase (Fragment) OS=Homo sapiens GN=PKM PE=1 SV=1;>tr|B4DRT	1.728	3	NaN	1.4847	1.5248	NaN		0.673537	+	0.655824	+	2	0.66468
P12821-2;I3UJJ7;P12821;J3QLR4;F6X3S4;B4DXK6;D3DU13;P12821-4;P12821-3;L7MUH0;I6L9B3	Angiotensin-converting enzyme;Angiotensin-converting enzyme, soluble form	ACE	>sp|P12821-2|ACE_HUMAN Isoform Somatic-2 of Angiotensin-converting enzyme OS=Homo sapiens GN=ACE;>tr|I3UJJ7|I3UJJ7_HUMAN Angiotensin I converting enzyme peptidyl-dipeptidase A 1 transcript variant OS=Homo sapiens GN=ACE PE=2 SV=1;>sp|P12821|ACE_HUMAN Angio	1.7294	4	1.8175	1.8892	1.257	0.550206	+	0.529325	+	0.795545		2	0.550206
I0CE67;Q6I9R8;Q14192;Q2XQU9;J3KNW4;Q53T40;Q2TSB7;Q53QP3	Four and a half LIM domains protein 2	FHL2;AAG11	>tr|I0CE67|I0CE67_HUMAN Four-and-a-half LIM domains 2 OS=Homo sapiens GN=FHL2 PE=2 SV=1;>tr|Q6I9R8|Q6I9R8_HUMAN FHL2 protein OS=Homo sapiens GN=FHL2 PE=2 SV=1;>sp|Q14192|FHL2_HUMAN Four and a half LIM domains protein 2 OS=Homo sapiens GN=FHL2 PE=1 SV=3;>tr	1.7401	7	NaN	1.7401	1.6015	NaN		0.57468	+	0.624415	+	2	0.599547
S4R313;Q9NP74;Q9NP74-2;Q9NP74-3	Palmdelphin	PALMD	>tr|S4R313|S4R313_HUMAN Palmdelphin OS=Homo sapiens GN=PALMD PE=1 SV=1;>sp|Q9NP74|PALMD_HUMAN Palmdelphin OS=Homo sapiens GN=PALMD PE=1 SV=1;>sp|Q9NP74-2|PALMD_HUMAN Isoform 2 of Palmdelphin OS=Homo sapiens GN=PALMD	1.746	6	1.362	1.603	1.8504	0.734214		0.62383	+	0.540424	+	2	0.62383
Q96AF9;Q28617;B4DY85;Q15942;C9JJK5;B4DQX7;B4DQR8;H0Y2Y8;Q9BUS0;C9IZ41;H7C3R3	Zyxin	ZYX	>tr|Q96AF9|Q96AF9_HUMAN ZYX protein (Fragment) OS=Homo sapiens GN=ZYX PE=2 SV=2;>tr|Q28617|Q28617_HUMAN ESP-2 (Fragment) OS=Homo sapiens PE=2 SV=1;>tr|B4DY85|B4DY85_HUMAN cDNA FLJ61463, highly similar to Zyxin OS=Homo sapiens PE=2 SV=1;>sp|Q15942|ZYX_HUMAN	1.7486	4	2.0866	1.3878	NaN	0.479249	+	0.720565	+	NaN		2	0.599907
Q5VY60;Q7Z4H7;Q7Z4H7-2;Q7Z4H7-3;Q5SYF9	HAUS augmin-like complex subunit 6	HAUS6	>tr|Q5VY60|Q5VY60_HUMAN HAUS augmin-like complex subunit 6 OS=Homo sapiens GN=HAUS6 PE=1 SV=1;>sp|Q7Z4H7|HAUS6_HUMAN HAUS augmin-like complex subunit 6 OS=Homo sapiens GN=HAUS6 PE=1 SV=2;>sp|Q7Z4H7-2|HAUS6_HUMAN Isoform 2 of HAUS augmin-like complex subuni	1.7882	3	1.4564	1.3284	NaN	0.686625	+	0.752785	+	NaN		2	0.719705
F2Z2Y6;O95777;A4D0W0;C9JNV3;C9JIZ0	N-alpha-acetyltransferase 38, NatC auxiliary subunit	NAA38;LSM8	>tr|F2Z2Y6|F2Z2Y6_HUMAN N-alpha-acetyltransferase 38, NatC auxiliary subunit OS=Homo sapiens GN=NAA38 PE=4 SV=1;>sp|O95777|LSM8_HUMAN U6 snRNA-associated Sm-like protein LSm8 OS=Homo sapiens GN=LSM8 PE=1 SV=3;>tr|A4D0W0|A4D0W0_HUMAN LSM8 homolog, U6 small	1.8676	6	2.0757	1.6145	NaN	0.481765	+	0.619387	+	NaN		2	0.550576
Q9BT67	NEDD4 family-interacting protein 1	NDFIP1	>sp|Q9BT67|NFIP1_HUMAN NEDD4 family-interacting protein 1 OS=Homo sapiens GN=NDFIP1 PE=1 SV=1	1.9114	3	NaN	1.9266	1.9435	NaN		0.519049	+	0.514536	+	2	0.516792
Q9BX67-2;Q9BX67	Junctional adhesion molecule C	JAM3	>sp|Q9BX67-2|JAM3_HUMAN Isoform 2 of Junctional adhesion molecule C OS=Homo sapiens GN=JAM3;>sp|Q9BX67|JAM3_HUMAN Junctional adhesion molecule C OS=Homo sapiens GN=JAM3 PE=1 SV=1	1.9148	4	1.6843	2.0488	NaN	0.593718	+	0.488091	+	NaN		2	0.540905
O75962-2;O75962;O75962-4;D3DTD2;E7EPJ7;O75962-5;E7EWP2;Q7Z2K2;O75962-3;F5H228;B4E3M5	Triple functional domain protein	TRIO	>sp|O75962-2|TRIO_HUMAN Isoform 2 of Triple functional domain protein OS=Homo sapiens GN=TRIO;>sp|O75962|TRIO_HUMAN Triple functional domain protein OS=Homo sapiens GN=TRIO PE=1 SV=2;>sp|O75962-4|TRIO_HUMAN Isoform 4 of Triple functional domain protein OS=	1.9536	12	1.9342	1.6213	NaN	0.51701	+	0.616789	+	NaN		2	0.566899
Q8N2F6-4;Q8N2F6-2;Q8N2F6-6;Q8N2F6-3;Q8N2F6-5;Q8N2F6	Armadillo repeat-containing protein 10	ARMC10	>sp|Q8N2F6-4|ARM10_HUMAN Isoform 4 of Armadillo repeat-containing protein 10 OS=Homo sapiens GN=ARMC10;>sp|Q8N2F6-2|ARM10_HUMAN Isoform 2 of Armadillo repeat-containing protein 10 OS=Homo sapiens GN=ARMC10;>sp|Q8N2F6-6|ARM10_HUMAN Isoform 6 of Armadillo re	1.9726	6	1.1788	3.2362	1.67	0.84832		0.309004	+	0.598802	+	2	0.598802
Q96H20-2;Q96H20	Vacuolar-sorting protein SNF8	SNF8	>sp|Q96H20-2|SNF8_HUMAN Isoform 2 of Vacuolar-sorting protein SNF8 OS=Homo sapiens GN=SNF8;>sp|Q96H20|SNF8_HUMAN Vacuolar-sorting protein SNF8 OS=Homo sapiens GN=SNF8 PE=1 SV=1	2.1408	5	NaN	2.0324	1.919	NaN		0.492029	+	0.521105	+	2	0.506567
Q6UVK1	Chondroitin sulfate proteoglycan 4	CSPG4	>sp|Q6UVK1|CSPG4_HUMAN Chondroitin sulfate proteoglycan 4 OS=Homo sapiens GN=CSPG4 PE=1 SV=2	2.2305	3	2.0482	1.9695	NaN	0.488234	+	0.507743	+	NaN		2	0.497988
H0YE40;H0YD13;B4E2X0;H0Y2P0;B4DN59;P16070-18;P16070-12;A8K309;P16070-14;P16070-13;P16070-11;P16070-10;P16070-16;P16070-8;P16070-17;P16070-6;P16070-4;P16070-3;P16070-7;E7EPC6;P16070-5;P16070;J3KN83	CD44 antigen	CD44	>tr|H0YE40|H0YE40_HUMAN CD44 antigen (Fragment) OS=Homo sapiens GN=CD44 PE=1 SV=1;>tr|H0YD13|H0YD13_HUMAN CD44 antigen OS=Homo sapiens GN=CD44 PE=1 SV=2;>tr|B4E2X0|B4E2X0_HUMAN cDNA FLJ60041, highly similar to CD44 antigen OS=Homo sapiens PE=2 SV=1;>tr|H0Y	4.0839	4	4.6524	NaN	4.0923	0.214943	+	NaN		0.244361	+	2	0.229652
Q5T3N1;Q5TZZ9;P04083;B5BU38;Q5T3N0;B4DL19	Annexin;Annexin A1	ANXA1	>tr|Q5T3N1|Q5T3N1_HUMAN Annexin (Fragment) OS=Homo sapiens GN=ANXA1 PE=1 SV=1;>tr|Q5TZZ9|Q5TZZ9_HUMAN Annexin OS=Homo sapiens GN=ANXA1 PE=2 SV=1;>sp|P04083|ANXA1_HUMAN Annexin A1 OS=Homo sapiens GN=ANXA1 PE=1 SV=2;>tr|B5BU38|B5BU38_HUMAN Annexin OS=Homo sa	8.2908	5	7.7771	NaN	8.2748	0.128583	+	NaN		0.120849	+	2	0.124716
A2IDA3;P29372-5;P29372-4;P29372-2;Q1W6H1;P29372	DNA-3-methyladenine glycosylase	MPG	>tr|A2IDA3|A2IDA3_HUMAN DNA-3-methyladenine glycosylase (Fragment) OS=Homo sapiens GN=MPG PE=1 SV=1;>sp|P29372-5|3MG_HUMAN Isoform 4 of DNA-3-methyladenine glycosylase OS=Homo sapiens GN=MPG;>sp|P29372-4|3MG_HUMAN Isoform 3 of DNA-3-methyladenine glycosyla	10.621	5	1.5357	NaN	3.3853	0.651169	+	NaN		0.295395	+	2	0.473282
P81605;P81605-2	Dermcidin;Survival-promoting peptide;DCD-1	DCD	>sp|P81605|DCD_HUMAN Dermcidin OS=Homo sapiens GN=DCD PE=1 SV=2;>sp|P81605-2|DCD_HUMAN Isoform 2 of Dermcidin OS=Homo sapiens GN=DCD	0.030202	4	NaN	NaN	0.11752	NaN		NaN		8.50919	+	1	8.50919
Q59HB3;E1A689;P04114;C0JYY2;Q13828;S5FMV1;E1B4S9	Apolipoprotein B-100;Apolipoprotein B-48	APOB	>tr|Q59HB3|Q59HB3_HUMAN Apolipoprotein B variant (Fragment) OS=Homo sapiens PE=2 SV=1;>tr|E1A689|E1A689_HUMAN Mutant Apo B 100 OS=Homo sapiens PE=2 SV=1;>sp|P04114|APOB_HUMAN Apolipoprotein B-100 OS=Homo sapiens GN=APOB PE=1 SV=2;>tr|C0JYY2|C0JYY2_HUMAN Ap	0.053121	3	NaN	NaN	0.039531	NaN		NaN		25.2966	+	1	25.2966
K7ESD3;K7EJD1;A6NJL1;Q9BUG6;A6NGD5;A0A024R4S6;P0CG00	Zinc finger and SCAN domain-containing protein 5B;Zinc finger and SCAN domain-containing protein 5A;Zinc finger and SCAN domain-containing protein 5C;Putative zinc finger and SCAN domain-containing protein 5D	ZSCAN5B;ZSCAN5A;ZSCAN5C;ZSCAN5D	>tr|K7ESD3|K7ESD3_HUMAN Zinc finger and SCAN domain-containing protein 5B (Fragment) OS=Homo sapiens GN=ZSCAN5B PE=4 SV=2;>tr|K7EJD1|K7EJD1_HUMAN Zinc finger and SCAN domain-containing protein 5B (Fragment) OS=Homo sapiens GN=ZSCAN5B PE=4 SV=1;>sp|A6NJL1|Z	0.087688	3	0.11364	NaN	NaN	8.79972	+	NaN		NaN		1	8.79972
Q6UVY6-2;Q6UVY6	DBH-like monooxygenase protein 1	MOXD1	>sp|Q6UVY6-2|MOXD1_HUMAN Isoform 2 of DBH-like monooxygenase protein 1 OS=Homo sapiens GN=MOXD1;>sp|Q6UVY6|MOXD1_HUMAN DBH-like monooxygenase protein 1 OS=Homo sapiens GN=MOXD1 PE=2 SV=1	0.16312	5	NaN	NaN	0.14009	NaN		NaN		7.13827	+	1	7.13827
Q6UWW7;Q9NNX1-3;A6PVU8;B7Z688;Q9NNX1-2;Q9NNX1;Q53FX0;F5H607;B7Z4Y1	Tuftelin	UNQ865;TUFT1	>tr|Q6UWW7|Q6UWW7_HUMAN TUFT1 OS=Homo sapiens GN=UNQ865 PE=2 SV=1;>sp|Q9NNX1-3|TUFT1_HUMAN Isoform 3 of Tuftelin OS=Homo sapiens GN=TUFT1;>tr|A6PVU8|A6PVU8_HUMAN Tuftelin OS=Homo sapiens GN=TUFT1 PE=4 SV=1;>tr|B7Z688|B7Z688_HUMAN cDNA FLJ57192, highly simi	0.19158	4	NaN	NaN	0.46101	NaN		NaN		2.16915	+	1	2.16915
A4D1N7;Q9HCM2;A0A024R7A6	Plexin-A4	PLXNA4	>tr|A4D1N7|A4D1N7_HUMAN Plexin A4 OS=Homo sapiens GN=PLXNA4 PE=4 SV=1;>sp|Q9HCM2|PLXA4_HUMAN Plexin-A4 OS=Homo sapiens GN=PLXNA4 PE=1 SV=4;>tr|A0A024R7A6|A0A024R7A6_HUMAN Plexin A4, B, isoform CRA_b OS=Homo sapiens GN=PLXNA4B PE=4 SV=1	0.27922	2	NaN	0.27922	NaN	NaN		3.58141	+	NaN		1	3.58141
Q9BTM9-3;Q9BTM9;A0A024R8C7;Q9BTM9-2	Ubiquitin-related modifier 1 homolog	URM1	>sp|Q9BTM9-3|URM1_HUMAN Isoform 3 of Ubiquitin-related modifier 1 OS=Homo sapiens GN=URM1;>sp|Q9BTM9|URM1_HUMAN Ubiquitin-related modifier 1 OS=Homo sapiens GN=URM1 PE=1 SV=1;>tr|A0A024R8C7|A0A024R8C7_HUMAN Ubiquitin-related modifier 1 OS=Homo sapiens GN=C	0.32361	3	NaN	0.38912	NaN	NaN		2.5699	+	NaN		1	2.5699
P62760;Q4ZFX3;Q53RT2;E9PE24;E7ER47	Visinin-like protein 1	VSNL1	>sp|P62760|VISL1_HUMAN Visinin-like protein 1 OS=Homo sapiens GN=VSNL1 PE=1 SV=2;>tr|Q4ZFX3|Q4ZFX3_HUMAN Putative uncharacterized protein VSNL1 (Fragment) OS=Homo sapiens GN=VSNL1 PE=4 SV=1	0.32997	5	0.33419	NaN	NaN	2.99231	+	NaN		NaN		1	2.99231
B2R8T5;Q6ZSY0;B7Z3T9;Q8N653	Leucine-zipper-like transcriptional regulator 1	LZTR1	>tr|B2R8T5|B2R8T5_HUMAN cDNA, FLJ94057, highly similar to Homo sapiens leucine-zipper-like transcriptional regulator, 1(LZTR1), mRNA OS=Homo sapiens PE=2 SV=1;>tr|Q6ZSY0|Q6ZSY0_HUMAN cDNA FLJ45137 fis, clone BRAWH3038827, highly similar to Homo sapiens leu	0.37055	2	NaN	0.37055	NaN	NaN		2.69869	+	NaN		1	2.69869
Q53FX1;O43915	Vascular endothelial growth factor D	FIGF	>tr|Q53FX1|Q53FX1_HUMAN Vascular endothelial growth factor D preproprotein variant (Fragment) OS=Homo sapiens PE=2 SV=1;>sp|O43915|VEGFD_HUMAN Vascular endothelial growth factor D OS=Homo sapiens GN=FIGF PE=1 SV=1	0.39886	2	0.39886	NaN	NaN	2.50715	+	NaN		NaN		1	2.50715
Q9HCJ6;A8K288;Q8NDE0	Synaptic vesicle membrane protein VAT-1 homolog-like	VAT1L;DKFZp547P162	>sp|Q9HCJ6|VAT1L_HUMAN Synaptic vesicle membrane protein VAT-1 homolog-like OS=Homo sapiens GN=VAT1L PE=1 SV=2;>tr|A8K288|A8K288_HUMAN cDNA FLJ76322 OS=Homo sapiens PE=2 SV=1;>tr|Q8NDE0|Q8NDE0_HUMAN Putative uncharacterized protein DKFZp547P162 (Fragment)	0.39978	2	NaN	NaN	0.39978	NaN		NaN		2.50138	+	1	2.50138
A8MU44;Q9UJC3;Q32Q39	Protein Hook homolog 1	HOOK1	>tr|A8MU44|A8MU44_HUMAN Protein Hook homolog 1 OS=Homo sapiens GN=HOOK1 PE=1 SV=2;>sp|Q9UJC3|HOOK1_HUMAN Protein Hook homolog 1 OS=Homo sapiens GN=HOOK1 PE=1 SV=2;>tr|Q32Q39|Q32Q39_HUMAN HOOK1 protein (Fragment) OS=Homo sapiens GN=HOOK1 PE=2 SV=1	0.43761	4	NaN	0.42494	NaN	NaN		2.35327	+	NaN		1	2.35327
B7Z841;D3DSC5;O15394	Neural cell adhesion molecule 2	NCAM2	>tr|B7Z841|B7Z841_HUMAN Neural cell adhesion molecule 2 OS=Homo sapiens GN=NCAM2 PE=2 SV=1;>tr|D3DSC5|D3DSC5_HUMAN Neural cell adhesion molecule 2, isoform CRA_a (Fragment) OS=Homo sapiens GN=NCAM2 PE=4 SV=1;>sp|O15394|NCAM2_HUMAN Neural cell adhesion mole	0.48448	2	0.48448	NaN	NaN	2.06407	+	NaN		NaN		1	2.06407
Q9UQR0;B4DZR9;Q9UQR0-2	Sex comb on midleg-like protein 2	SCML2	>sp|Q9UQR0|SCML2_HUMAN Sex comb on midleg-like protein 2 OS=Homo sapiens GN=SCML2 PE=1 SV=1;>tr|B4DZR9|B4DZR9_HUMAN cDNA FLJ54781, highly similar to Sex comb on midleg-like protein 2 OS=Homo sapiens PE=2 SV=1	0.48567	5	0.48567	NaN	NaN	2.05901	+	NaN		NaN		1	2.05901
B4DE59;F5GWP8		JUP	>tr|B4DE59|B4DE59_HUMAN cDNA FLJ60424, highly similar to Junction plakoglobin OS=Homo sapiens PE=2 SV=1;>tr|F5GWP8|F5GWP8_HUMAN Junction plakoglobin OS=Homo sapiens GN=JUP PE=1 SV=1	0.50084	3	NaN	NaN	0.29677	NaN		NaN		3.36961	+	1	3.36961
B4E095;H6U5S4;Q1MSW8;Q1MSX0;Q5U0E4;Q2XSC7;H6U5S3;H6U5S2;B6E4X6;Q1HGV3;Q1HGV2;Q1HGV1;Q1HGV0;B1PZ15;Q19RW6;A4GWB8;A4GWD0;D5KL90;A2I9Y7;L0ES92;L0ERS6;L0ERL2;L0ERK8;L0ERJ3;L0ERI9;L0EQY4;L0EQX9;L0EQV3;L0EQT1;L0EQS1;L0EQJ1;L0EQ89;L0EP99;L0EP82;E2G6R5;A4GWB5;L0ESB7;S5M713;S5M706;S5M224;S5M207;S5LQX7;S5LQU8;S5LQU3;S5LQQ1;S5LMG1;S5LME3;S5LMC6;S5LJ61;S5LJ49;S5LJ04;Q0ZAK0;Q0ZAK1;E9PFT5;H6U5S5;E7ESS1;P04637-…	Cellular tumor antigen p53	TP53	>tr|B4E095|B4E095_HUMAN Cellular tumor antigen p53 OS=Homo sapiens PE=2 SV=1;>tr|H6U5S4|H6U5S4_HUMAN Cellular tumor antigen p53 (Fragment) OS=Homo sapiens PE=2 SV=1;>tr|Q1MSW8|Q1MSW8_HUMAN Cellular tumor antigen p53 (Fragment) OS=Homo sapiens GN=TP53 PE=2	0.51021	4	0.51296	NaN	NaN	1.94947	+	NaN		NaN		1	1.94947
O15014	Zinc finger protein 609	ZNF609	>sp|O15014|ZN609_HUMAN Zinc finger protein 609 OS=Homo sapiens GN=ZNF609 PE=1 SV=2	0.51165	2	NaN	0.51165	NaN	NaN		1.95446	+	NaN		1	1.95446
H7BXW8;Q9BXF3-2;E2QRE6;Q9BXF3-3;Q9BXF3	Cat eye syndrome critical region protein 2	CECR2	>tr|H7BXW8|H7BXW8_HUMAN Cat eye syndrome critical region protein 2 OS=Homo sapiens GN=CECR2 PE=1 SV=1;>sp|Q9BXF3-2|CECR2_HUMAN Isoform B of Cat eye syndrome critical region protein 2 OS=Homo sapiens GN=CECR2;>tr|E2QRE6|E2QRE6_HUMAN Cat eye syndrome critica	0.51533	3	NaN	0.59157	NaN	NaN		1.69042	+	NaN		1	1.69042
B4DLX6;B4DYU4;P42336;A8KA75;Q4LE51	Phosphatidylinositol 4,5-bisphosphate 3-kinase catalytic subunit alpha isoform	PIK3CA;PIK3CA variant protein	>tr|B4DLX6|B4DLX6_HUMAN cDNA FLJ54636, highly similar to Phosphatidylinositol-4,5-bisphosphate 3-kinase catalytic subunit alpha isoform (EC 2.7.1.153) OS=Homo sapiens PE=2 SV=1;>tr|B4DYU4|B4DYU4_HUMAN cDNA FLJ50922, highly similar to Phosphatidylinositol-4	0.52392	2	NaN	NaN	0.52392	NaN		NaN		1.90869	+	1	1.90869
Q9BQ69	O-acetyl-ADP-ribose deacetylase MACROD1	MACROD1	>sp|Q9BQ69|MACD1_HUMAN O-acetyl-ADP-ribose deacetylase MACROD1 OS=Homo sapiens GN=MACROD1 PE=1 SV=2	0.52625	3	0.74559	NaN	NaN	1.34122	+	NaN		NaN		1	1.34122
Q6ICU0;O14867;C9JMP6;C9IYR0;A8K4Q6	Transcription regulator protein BACH1	BACH1	>tr|Q6ICU0|Q6ICU0_HUMAN BACH1 protein (Fragment) OS=Homo sapiens GN=BACH1 PE=1 SV=1;>sp|O14867|BACH1_HUMAN Transcription regulator protein BACH1 OS=Homo sapiens GN=BACH1 PE=1 SV=2;>tr|C9JMP6|C9JMP6_HUMAN Transcription regulator protein BACH1 (Fragment) OS=	0.53651	2	0.53651	NaN	NaN	1.8639	+	NaN		NaN		1	1.8639
C9JE12;C9JCW7;Q9BVT8	Transmembrane and ubiquitin-like domain-containing protein 1	TMUB1	>tr|C9JE12|C9JE12_HUMAN Transmembrane and ubiquitin-like domain-containing protein 1 (Fragment) OS=Homo sapiens GN=TMUB1 PE=1 SV=1;>tr|C9JCW7|C9JCW7_HUMAN Transmembrane and ubiquitin-like domain-containing protein 1 (Fragment) OS=Homo sapiens GN=TMUB1 PE=1	0.54298	3	0.49432	NaN	NaN	2.02298	+	NaN		NaN		1	2.02298
Q96K76-2;Q96K76-4;Q96K76;A0PJ80;Q96K76-3;B3KRV9	Ubiquitin carboxyl-terminal hydrolase 47	USP47	>sp|Q96K76-2|UBP47_HUMAN Isoform 2 of Ubiquitin carboxyl-terminal hydrolase 47 OS=Homo sapiens GN=USP47;>sp|Q96K76-4|UBP47_HUMAN Isoform 4 of Ubiquitin carboxyl-terminal hydrolase 47 OS=Homo sapiens GN=USP47;>sp|Q96K76|UBP47_HUMAN Ubiquitin carboxyl-termin	0.54823	5	NaN	NaN	0.73051	NaN		NaN		1.36891	+	1	1.36891
Q7Z5J4-3;E7EVZ3;Q7Z5J4-2;Q7Z5J4;A8MXE8;Q7Z5J4-4	Retinoic acid-induced protein 1	RAI1	>sp|Q7Z5J4-3|RAI1_HUMAN Isoform 3 of Retinoic acid-induced protein 1 OS=Homo sapiens GN=RAI1;>tr|E7EVZ3|E7EVZ3_HUMAN Retinoic acid-induced protein 1 OS=Homo sapiens GN=RAI1 PE=1 SV=1;>sp|Q7Z5J4-2|RAI1_HUMAN Isoform 2 of Retinoic acid-induced protein 1 OS=H	0.54868	3	0.54868	NaN	NaN	1.82256	+	NaN		NaN		1	1.82256
P29374-3;A0A024R680;P29374-2;A0A024R6A2;P29374;A0A024R657;Q05CG0;H7C485	AT-rich interactive domain-containing protein 4A	ARID4A	>sp|P29374-3|ARI4A_HUMAN Isoform III of AT-rich interactive domain-containing protein 4A OS=Homo sapiens GN=ARID4A;>tr|A0A024R680|A0A024R680_HUMAN AT rich interactive domain 4A (RBP1-like), isoform CRA_b OS=Homo sapiens GN=ARID4A PE=4 SV=1;>sp|P29374-2|ARI	0.55185	2	0.55185	NaN	NaN	1.81209	+	NaN		NaN		1	1.81209
H0YMB1;Q96TC7-2;B3KUI4;Q96TC7;A0A024R9P6;H0YNE5	Regulator of microtubule dynamics protein 3	RMDN3	>tr|H0YMB1|H0YMB1_HUMAN Regulator of microtubule dynamics protein 3 (Fragment) OS=Homo sapiens GN=RMDN3 PE=1 SV=1;>sp|Q96TC7-2|RMD3_HUMAN Isoform 2 of Regulator of microtubule dynamics protein 3 OS=Homo sapiens GN=RMDN3;>tr|B3KUI4|B3KUI4_HUMAN cDNA FLJ3996	0.55188	4	0.68517	NaN	NaN	1.45949	+	NaN		NaN		1	1.45949
Q15120;Q15120-2	[Pyruvate dehydrogenase [lipoamide]] kinase isozyme 3, mitochondrial	PDK3	>sp|Q15120|PDK3_HUMAN [Pyruvate dehydrogenase (acetyl-transferring)] kinase isozyme 3, mitochondrial OS=Homo sapiens GN=PDK3 PE=1 SV=1;>sp|Q15120-2|PDK3_HUMAN Isoform 2 of [Pyruvate dehydrogenase (acetyl-transferring)] kinase isozyme 3, mitochondrial OS=Ho	0.55996	3	0.50503	NaN	NaN	1.98008	+	NaN		NaN		1	1.98008
Q04727-4;Q04727;Q04727-3;F8W9R0;B3KQ29;B4E345;Q04727-2;G8JLG4;Q04724;H0YNI7;B4DE62;B3KM67;B4E2W3;Q04725-2;Q04725;K7EMK7;B4DEF9;H0Y5S0;K7EJR7;H7C4E4;A6NIY7;Q59EF7;Q04725-3	Transducin-like enhancer protein 4;Transducin-like enhancer protein 1;Transducin-like enhancer protein 2	TLE4;TLE1;TLE3;TLE2	>sp|Q04727-4|TLE4_HUMAN Isoform 4 of Transducin-like enhancer protein 4 OS=Homo sapiens GN=TLE4;>sp|Q04727|TLE4_HUMAN Transducin-like enhancer protein 4 OS=Homo sapiens GN=TLE4 PE=1 SV=3;>sp|Q04727-3|TLE4_HUMAN Isoform 3 of Transducin-like enhancer protein	0.57413	3	0.74195	NaN	NaN	1.3478	+	NaN		NaN		1	1.3478
O00148;B4DX78;O00148-2;K7EQN7;B1Q2N1;A0A024R7H0;Q69YT6;K7EPJ3	ATP-dependent RNA helicase DDX39A	DDX39A;DDX39	>sp|O00148|DX39A_HUMAN ATP-dependent RNA helicase DDX39A OS=Homo sapiens GN=DDX39A PE=1 SV=2;>tr|B4DX78|B4DX78_HUMAN cDNA FLJ55484, highly similar to ATP-dependent RNA helicase DDX39 (EC 3.6.1.-) OS=Homo sapiens PE=2 SV=1;>sp|O00148-2|DX39A_HUMAN Isoform 2	0.57444	112	0.96196	1.0093	0.37789	1.03954		0.990786		2.64627	+	1	1.03954
Q9Y4H2;Q96RG4;Q96RG5;Q8TF73	Insulin receptor substrate 2	IRS2	>sp|Q9Y4H2|IRS2_HUMAN Insulin receptor substrate 2 OS=Homo sapiens GN=IRS2 PE=1 SV=2;>tr|Q96RG4|Q96RG4_HUMAN Insulin receptor substrate 2 insertion mutant (Fragment) OS=Homo sapiens GN=IRS2 PE=4 SV=1;>tr|Q96RG5|Q96RG5_HUMAN Insulin receptor substrate 2 ins	0.59424	4	0.88548	NaN	0.64507	1.12933		NaN		1.55022	+	1	1.33978
Q9Y5Z4;Q05DB4;Q5THN1;Q9Y5Z4-2	Heme-binding protein 2	HEBP2	>sp|Q9Y5Z4|HEBP2_HUMAN Heme-binding protein 2 OS=Homo sapiens GN=HEBP2 PE=1 SV=1;>tr|Q05DB4|Q05DB4_HUMAN HEBP2 protein (Fragment) OS=Homo sapiens GN=HEBP2 PE=2 SV=1;>tr|Q5THN1|Q5THN1_HUMAN Heme-binding protein 2 OS=Homo sapiens GN=HEBP2 PE=1 SV=1;>sp|Q9Y5Z	0.60501	3	0.47477	NaN	0.77904	2.10628	+	NaN		1.28363		1	1.69496
E9PLL7;Q96JM7-2;A8K2F4;Q96JM7;E9PI01	Lethal(3)malignant brain tumor-like protein 3	L3MBTL3	>tr|E9PLL7|E9PLL7_HUMAN Lethal(3)malignant brain tumor-like protein 3 (Fragment) OS=Homo sapiens GN=L3MBTL3 PE=4 SV=1;>sp|Q96JM7-2|LMBL3_HUMAN Isoform 2 of Lethal(3)malignant brain tumor-like protein 3 OS=Homo sapiens GN=L3MBTL3;>tr|A8K2F4|A8K2F4_HUMAN cDN	0.61033	4	0.61033	NaN	NaN	1.63846	+	NaN		NaN		1	1.63846
Q96KM6	Zinc finger protein 512B	ZNF512B	>sp|Q96KM6|Z512B_HUMAN Zinc finger protein 512B OS=Homo sapiens GN=ZNF512B PE=1 SV=1	0.61423	3	0.59951	NaN	NaN	1.66803	+	NaN		NaN		1	1.66803
Q4G176;F5H5A1;F5H2G6;Q6P2C7;F5H3B2;H0YH37;H0YGC7;F5H362;F5H755;F5GX20	Acyl-CoA synthetase family member 3, mitochondrial	ACSF3	>sp|Q4G176|ACSF3_HUMAN Acyl-CoA synthetase family member 3, mitochondrial OS=Homo sapiens GN=ACSF3 PE=1 SV=3;>tr|F5H5A1|F5H5A1_HUMAN Acyl-CoA synthetase family member 3, mitochondrial OS=Homo sapiens GN=ACSF3 PE=1 SV=1;>tr|F5H2G6|F5H2G6_HUMAN Acyl-CoA synt	0.61477	3	0.61477	NaN	NaN	1.62662	+	NaN		NaN		1	1.62662
B4DT97;C9J3D7;Q9UKG9;Q9UKG9-3	Peroxisomal carnitine O-octanoyltransferase	CROT	>tr|B4DT97|B4DT97_HUMAN cDNA FLJ56931, highly similar to Peroxisomal carnitine O-octanoyltransferase (EC 2.3.1.137) OS=Homo sapiens PE=2 SV=1;>tr|C9J3D7|C9J3D7_HUMAN Peroxisomal carnitine O-octanoyltransferase OS=Homo sapiens GN=CROT PE=1 SV=1;>sp|Q9UKG9|O	0.61895	2	0.61895	NaN	NaN	1.61564	+	NaN		NaN		1	1.61564
Q8WY54-2;A7E2X1;Q8WY54-3;Q8WY54	Protein phosphatase 1E	PPM1E	>sp|Q8WY54-2|PPM1E_HUMAN Isoform 2 of Protein phosphatase 1E OS=Homo sapiens GN=PPM1E;>tr|A7E2X1|A7E2X1_HUMAN PPM1E protein OS=Homo sapiens GN=PPM1E PE=2 SV=1;>sp|Q8WY54-3|PPM1E_HUMAN Isoform 3 of Protein phosphatase 1E OS=Homo sapiens GN=PPM1E;>sp|Q8WY54|	0.62016	3	0.4537	NaN	NaN	2.2041	+	NaN		NaN		1	2.2041
Q49A68;E5RHU1;Q96MH6	Transmembrane protein 68	TMEM68	>tr|Q49A68|Q49A68_HUMAN TMEM68 protein OS=Homo sapiens GN=TMEM68 PE=2 SV=1;>tr|E5RHU1|E5RHU1_HUMAN Transmembrane protein 68 (Fragment) OS=Homo sapiens GN=TMEM68 PE=4 SV=1;>sp|Q96MH6|TMM68_HUMAN Transmembrane protein 68 OS=Homo sapiens GN=TMEM68 PE=2 SV=2	0.62204	4	NaN	NaN	0.65148	NaN		NaN		1.53497	+	1	1.53497
P78540;A0A024R6A0	Arginase-2, mitochondrial	ARG2	>sp|P78540|ARGI2_HUMAN Arginase-2, mitochondrial OS=Homo sapiens GN=ARG2 PE=1 SV=1;>tr|A0A024R6A0|A0A024R6A0_HUMAN Arginase, type II, isoform CRA_a OS=Homo sapiens GN=ARG2 PE=3 SV=1	0.62521	4	1.1984	NaN	0.5678	0.834446		NaN		1.76118	+	1	1.29781
Q8WXF0	Serine/arginine-rich splicing factor 12	SRSF12	>sp|Q8WXF0|SRS12_HUMAN Serine/arginine-rich splicing factor 12 OS=Homo sapiens GN=SRSF12 PE=2 SV=1	0.6262	3	0.61673	NaN	0.77953	1.62146	+	NaN		1.28282		1	1.45214
B4DL13;Q9UL03-3;Q9UL03;A0A024RDU0;B3KQH5	Integrator complex subunit 6	INTS6	>tr|B4DL13|B4DL13_HUMAN Integrator complex subunit 6 OS=Homo sapiens GN=INTS6 PE=2 SV=1;>sp|Q9UL03-3|INT6_HUMAN Isoform 3 of Integrator complex subunit 6 OS=Homo sapiens GN=INTS6;>sp|Q9UL03|INT6_HUMAN Integrator complex subunit 6 OS=Homo sapiens GN=INTS6 P	0.6319	2	0.6319	NaN	NaN	1.58253	+	NaN		NaN		1	1.58253
Q5T0I0;B7Z4U6;B7Z2X4;B7Z992;P06396-2;P06396-4;P06396-3;B7Z9A0;B7Z6N2;CON__Q3SX14;P06396;Q69YR8;Q5T0I1;Q5T0H9;B3KS49	Gelsolin	GSN;DKFZp313L0718	>tr|Q5T0I0|Q5T0I0_HUMAN Gelsolin (Fragment) OS=Homo sapiens GN=GSN PE=1 SV=1;>tr|B7Z4U6|B7Z4U6_HUMAN cDNA FLJ55803, highly similar to Gelsolin OS=Homo sapiens PE=2 SV=1;>tr|B7Z2X4|B7Z2X4_HUMAN cDNA FLJ53327, highly similar to Gelsolin OS=Homo sapiens PE=2	0.63389	4	0.57753	NaN	NaN	1.73151	+	NaN		NaN		1	1.73151
F8WCX2;Q8N1G0-2;Q8N1G0	Zinc finger protein 687	ZNF687	>tr|F8WCX2|F8WCX2_HUMAN Zinc finger protein 687 OS=Homo sapiens GN=ZNF687 PE=1 SV=1;>sp|Q8N1G0-2|ZN687_HUMAN Isoform 2 of Zinc finger protein 687 OS=Homo sapiens GN=ZNF687;>sp|Q8N1G0|ZN687_HUMAN Zinc finger protein 687 OS=Homo sapiens GN=ZNF687 PE=1 SV=1	0.63544	3	0.63544	NaN	NaN	1.57371	+	NaN		NaN		1	1.57371
B3KX69;O94953;F5GX28;B7ZM63;K7EQ54	Lysine-specific demethylase 4B	KDM4B;JMJD2B	>tr|B3KX69|B3KX69_HUMAN cDNA FLJ44906 fis, clone BRAMY3007078, highly similar to JmjC domain-containing histone demethylation protein 3B OS=Homo sapiens PE=2 SV=1;>sp|O94953|KDM4B_HUMAN Lysine-specific demethylase 4B OS=Homo sapiens GN=KDM4B PE=1 SV=4;>tr|	0.63707	3	NaN	0.36921	NaN	NaN		2.70849	+	NaN		1	2.70849
Q96C36;B3KMB7;A0A024R3Q9;J3KR12;B4DQK8;Q8NCZ0	Pyrroline-5-carboxylate reductase 2	PYCR2	>sp|Q96C36|P5CR2_HUMAN Pyrroline-5-carboxylate reductase 2 OS=Homo sapiens GN=PYCR2 PE=1 SV=1;>tr|B3KMB7|B3KMB7_HUMAN Pyrroline-5-carboxylate reductase family, member 2, isoform CRA_a OS=Homo sapiens GN=PYCR2 PE=2 SV=1;>tr|A0A024R3Q9|A0A024R3Q9_HUMAN Pyrro	0.63816	4	0.58746	NaN	0.80687	1.70224	+	NaN		1.23936		1	1.4708
Q5W0B1	RING finger protein 219	RNF219	>sp|Q5W0B1|RN219_HUMAN RING finger protein 219 OS=Homo sapiens GN=RNF219 PE=1 SV=1	0.63824	3	NaN	NaN	0.61805	NaN		NaN		1.61799	+	1	1.61799
O75494-5;Q5JRI1;O75494-4;O75494-6;O75494-3;O75494-2;Q53GD7;O75494;Q6IQ42;B3KNY6	Serine/arginine-rich splicing factor 10	SRSF10	>sp|O75494-5|SRS10_HUMAN Isoform 5 of Serine/arginine-rich splicing factor 10 OS=Homo sapiens GN=SRSF10;>tr|Q5JRI1|Q5JRI1_HUMAN Serine/arginine-rich-splicing factor 10 OS=Homo sapiens GN=SRSF10 PE=1 SV=1;>sp|O75494-4|SRS10_HUMAN Isoform 4 of Serine/arginin	0.64397	8	0.83721	0.87236	0.24258	1.19444		1.14632		4.12235	+	1	1.19444
M0R3B8;P17568	NADH dehydrogenase [ubiquinone] 1 beta subcomplex subunit 7	NDUFB7	>tr|M0R3B8|M0R3B8_HUMAN NADH dehydrogenase [ubiquinone] 1 beta subcomplex subunit 7 OS=Homo sapiens GN=NDUFB7 PE=4 SV=1;>sp|P17568|NDUB7_HUMAN NADH dehydrogenase [ubiquinone] 1 beta subcomplex subunit 7 OS=Homo sapiens GN=NDUFB7 PE=1 SV=4	0.64806	3	0.68399	NaN	NaN	1.46201	+	NaN		NaN		1	1.46201
Q96JQ0	Protocadherin-16	DCHS1	>sp|Q96JQ0|PCD16_HUMAN Protocadherin-16 OS=Homo sapiens GN=DCHS1 PE=1 SV=1	0.64839	2	NaN	NaN	0.64839	NaN		NaN		1.54228	+	1	1.54228
P17858;P17858-2;B4E108;B3KNQ7;Q9BSP4;Q7L2M7	6-phosphofructokinase, liver type	PFKL	>sp|P17858|PFKAL_HUMAN ATP-dependent 6-phosphofructokinase, liver type OS=Homo sapiens GN=PFKL PE=1 SV=6;>sp|P17858-2|PFKAL_HUMAN Isoform 2 of ATP-dependent 6-phosphofructokinase, liver type OS=Homo sapiens GN=PFKL	0.6514	4	NaN	0.71276	NaN	NaN		1.403	+	NaN		1	1.403
I3L1Q3;Q8TE02;Q8TE02-4	Elongator complex protein 5	ELP5	>tr|I3L1Q3|I3L1Q3_HUMAN Elongator complex protein 5 (Fragment) OS=Homo sapiens GN=ELP5 PE=4 SV=1;>sp|Q8TE02|ELP5_HUMAN Elongator complex protein 5 OS=Homo sapiens GN=ELP5 PE=1 SV=2;>sp|Q8TE02-4|ELP5_HUMAN Isoform 4 of Elongator complex protein 5 OS=Homo sa	0.65397	4	NaN	NaN	0.56217	NaN		NaN		1.77882	+	1	1.77882
Q15555-4;Q15555-5;Q15555-3;Q15555;A0A024RC33;M0QX52;K7EL66;K7ERD8;Q15555-2	Microtubule-associated protein RP/EB family member 2	MAPRE2	>sp|Q15555-4|MARE2_HUMAN Isoform 4 of Microtubule-associated protein RP/EB family member 2 OS=Homo sapiens GN=MAPRE2;>sp|Q15555-5|MARE2_HUMAN Isoform 5 of Microtubule-associated protein RP/EB family member 2 OS=Homo sapiens GN=MAPRE2;>sp|Q15555-3|MARE2_HUM	0.65458	3	0.65359	NaN	NaN	1.53001	+	NaN		NaN		1	1.53001
E9PNR5;O75907	Diacylglycerol O-acyltransferase 1	DGAT1	>tr|E9PNR5|E9PNR5_HUMAN Diacylglycerol O-acyltransferase 1 OS=Homo sapiens GN=DGAT1 PE=4 SV=1;>sp|O75907|DGAT1_HUMAN Diacylglycerol O-acyltransferase 1 OS=Homo sapiens GN=DGAT1 PE=1 SV=2	0.66023	3	0.64592	NaN	NaN	1.54818	+	NaN		NaN		1	1.54818
D6RD44;Q96EI5;Q96EI5-2;J3KQY4;D6RHZ1;D6RIH3;D6RCE9;A2RQR6	Transcription elongation factor A protein-like 4	TCEAL4	>tr|D6RD44|D6RD44_HUMAN Transcription elongation factor A protein-like 4 (Fragment) OS=Homo sapiens GN=TCEAL4 PE=1 SV=1;>sp|Q96EI5|TCAL4_HUMAN Transcription elongation factor A protein-like 4 OS=Homo sapiens GN=TCEAL4 PE=1 SV=2;>sp|Q96EI5-2|TCAL4_HUMAN Iso	0.66825	4	0.57691	0.7724	NaN	1.73337	+	1.29467		NaN		1	1.51402
Q2M1Z3;B7Z1P4	Rho GTPase-activating protein 31	ARHGAP31	>sp|Q2M1Z3|RHG31_HUMAN Rho GTPase-activating protein 31 OS=Homo sapiens GN=ARHGAP31 PE=1 SV=2;>tr|B7Z1P4|B7Z1P4_HUMAN cDNA FLJ61628, highly similar to Homo sapiens Cdc42 GTPase-activating protein (CDGAP), mRNA OS=Homo sapiens PE=2 SV=1	0.67591	3	0.67654	NaN	NaN	1.47811	+	NaN		NaN		1	1.47811
H0YKE7;F5GX29;B4DSB5;H0YNG9;Q99653;A0A024R9M9;H0YLY7;H0YLX1	Calcineurin B homologous protein 1	CHP1	>tr|H0YKE7|H0YKE7_HUMAN Calcineurin B homologous protein 1 OS=Homo sapiens GN=CHP1 PE=1 SV=1;>tr|F5GX29|F5GX29_HUMAN Calcineurin B homologous protein 1 OS=Homo sapiens GN=CHP1 PE=1 SV=1;>tr|B4DSB5|B4DSB5_HUMAN cDNA FLJ57188, highly similar to Calcium-bindi	0.67632	4	0.74945	0.813	0.65872	1.33431		1.23001		1.5181	+	1	1.33431
Q6NYC8;A0A024RCJ8;Q6ZTV1;Q6NYC8-2	Phostensin	PPP1R18	>sp|Q6NYC8|PPR18_HUMAN Phostensin OS=Homo sapiens GN=PPP1R18 PE=1 SV=1;>tr|A0A024RCJ8|A0A024RCJ8_HUMAN HCG1821276, isoform CRA_a OS=Homo sapiens GN=hCG_1821276 PE=4 SV=1;>tr|Q6ZTV1|Q6ZTV1_HUMAN cDNA FLJ44194 fis, clone THYMU2040975, weakly similar to PTB-A	0.67837	2	NaN	NaN	0.67837	NaN		NaN		1.47412	+	1	1.47412
Q7Z3K3-5;Q7Z3K3-7;Q7Z3K3-2;Q7Z3K3-3;Q7Z3K3-6;Q7Z3K3;F5H8H4;B4DSK8;H0YCT3;A6PW30;E9PJY9;E9PIR8;Q7Z3K3-4	Pogo transposable element with ZNF domain	POGZ	>sp|Q7Z3K3-5|POGZ_HUMAN Isoform 5 of Pogo transposable element with ZNF domain OS=Homo sapiens GN=POGZ;>sp|Q7Z3K3-7|POGZ_HUMAN Isoform 7 of Pogo transposable element with ZNF domain OS=Homo sapiens GN=POGZ;>sp|Q7Z3K3-2|POGZ_HUMAN Isoform 2 of Pogo transpos	0.68083	7	0.68083	1.3021	0.88337	1.4688	+	0.76799		1.13203		1	1.13203
Q96DT7-2;Q96DT7;Q9H9H3;Q96DT7-4;Q96DT7-3	Zinc finger and BTB domain-containing protein 10	ZBTB10	>sp|Q96DT7-2|ZBT10_HUMAN Isoform 2 of Zinc finger and BTB domain-containing protein 10 OS=Homo sapiens GN=ZBTB10;>sp|Q96DT7|ZBT10_HUMAN Zinc finger and BTB domain-containing protein 10 OS=Homo sapiens GN=ZBTB10 PE=1 SV=2;>tr|Q9H9H3|Q9H9H3_HUMAN cDNA FLJ127	0.68539	3	NaN	NaN	0.69331	NaN		NaN		1.44236	+	1	1.44236
A0PJD3;Q6PJG2;A0A024R689;H7C1L3;Q8NF55	ELM2 and SANT domain-containing protein 1	C14orf43;ELMSAN1	>tr|A0PJD3|A0PJD3_HUMAN C14orf43 protein (Fragment) OS=Homo sapiens GN=C14orf43 PE=2 SV=1;>sp|Q6PJG2|EMSA1_HUMAN ELM2 and SANT domain-containing protein 1 OS=Homo sapiens GN=ELMSAN1 PE=1 SV=2;>tr|A0A024R689|A0A024R689_HUMAN Chromosome 14 open reading frame	0.68574	3	1.8769	NaN	NaN	0.532793	+	NaN		NaN		1	0.532793
Q9BQE9-2;Q9BQE9-4;Q9BQE9	B-cell CLL/lymphoma 7 protein family member B	BCL7B	>sp|Q9BQE9-2|BCL7B_HUMAN Isoform 2 of B-cell CLL/lymphoma 7 protein family member B OS=Homo sapiens GN=BCL7B;>sp|Q9BQE9-4|BCL7B_HUMAN Isoform 4 of B-cell CLL/lymphoma 7 protein family member B OS=Homo sapiens GN=BCL7B;>sp|Q9BQE9|BCL7B_HUMAN B-cell CLL/lymp	0.68939	2	NaN	NaN	0.68939	NaN		NaN		1.45056	+	1	1.45056
P07311;G3V2U7	Acylphosphatase-1;Acylphosphatase	ACYP1	>sp|P07311|ACYP1_HUMAN Acylphosphatase-1 OS=Homo sapiens GN=ACYP1 PE=1 SV=2;>tr|G3V2U7|G3V2U7_HUMAN Acylphosphatase OS=Homo sapiens GN=ACYP1 PE=1 SV=1	0.69213	4	NaN	0.45969	NaN	NaN		2.17538	+	NaN		1	2.17538
Q96KQ7-2;Q96KQ7;A0A024RCN9;B7Z852;A2ABF8;A2ABF9;Q59FM7;Q96KQ7-3	Histone-lysine N-methyltransferase EHMT2	EHMT2	>sp|Q96KQ7-2|EHMT2_HUMAN Isoform 2 of Histone-lysine N-methyltransferase EHMT2 OS=Homo sapiens GN=EHMT2;>sp|Q96KQ7|EHMT2_HUMAN Histone-lysine N-methyltransferase EHMT2 OS=Homo sapiens GN=EHMT2 PE=1 SV=3;>tr|A0A024RCN9|A0A024RCN9_HUMAN Euchromatic histone-l	0.69362	5	NaN	0.69734	0.75846	NaN		1.43402	+	1.31846		1	1.37624
;D6MLI2;D6MLI1;D6MLH8;D6MLH6;D6MLH5;D6MLH4;D6MLH3;D6MLH2;D6MLH1;D6MLH0;D6ML64;D6ML63;D6ML62;D6ML61;D6ML56;D6ML55;D6ML54;D6ML53;D6ML52;D6ML51;D6ML50;D6ML48;D6ML47;D6ML46;D6ML45;D6ML44;D6ML43;D6ML42;D6ML41;D6ML40;D6ML39;D6ML37;D6ML35;D6ML34;D6ML33;D6ML32;D6ML31;D6ML30;D6ML28;D6ML24;D6ML23;D6ML21;D6ML20;D6ML19;D6ML18;D6ML17;D6ML16;D6ML15;D6ML12;D6ML10;D6ML09;D6ML07;D6ML06;D6ML05;D6ML04;D6ML01;D6ML00…	HLA class I histocompatibility antigen, A-30 alpha chain;HLA class I histocompatibility antigen, A-11 alpha chain;HLA class I histocompatibility antigen, A-3 alpha chain;HLA class I histocompatibility antigen, Cw-16 alpha chain;Putative HLA class I histocompatibility antigen, alpha chain H;HLA class I histocompatibility antigen, A-36 alpha chain;HLA class I histocompatibility antigen, A-23 alpha …	HLA-A;HLA;HLA-B;HLA-C;Cw;HLA-Cw;HLA-A*31;HLA-H;MHC class I HLA-A;HLA-A*0226;HLA-A24AK;HLA-A*33;HLA-A*02	>tr|F6IQZ0|F6IQZ0_HUMAN MHC class I antigen (Fragment) OS=Homo sapiens GN=HLA-A PE=3 SV=1;>tr|A0ZXY8|A0ZXY8_HUMAN MHC class I antigen (Fragment) OS=Homo sapiens GN=HLA-A PE=3 SV=1;>tr|V6CKU4|V6CKU4_HUMAN MHC class I antigen (Fragment) OS=Homo sapiens GN=HL	0.69926	3	0.61743	NaN	NaN	1.61962	+	NaN		NaN		1	1.61962
Q6ZT12;Q6ZT12-4	E3 ubiquitin-protein ligase UBR3	UBR3	>sp|Q6ZT12|UBR3_HUMAN E3 ubiquitin-protein ligase UBR3 OS=Homo sapiens GN=UBR3 PE=2 SV=2;>sp|Q6ZT12-4|UBR3_HUMAN Isoform 4 of E3 ubiquitin-protein ligase UBR3 OS=Homo sapiens GN=UBR3	0.70243	2	NaN	0.70243	NaN	NaN		1.42363	+	NaN		1	1.42363
Q6SPF0;E9PIW9	Atherin	SAMD1	>sp|Q6SPF0|SAMD1_HUMAN Atherin OS=Homo sapiens GN=SAMD1 PE=1 SV=1;>tr|E9PIW9|E9PIW9_HUMAN Atherin OS=Homo sapiens GN=SAMD1 PE=1 SV=1	0.70409	2	0.70409	NaN	NaN	1.42027	+	NaN		NaN		1	1.42027
Q9C0H2-2;Q9C0H2;A0A024R816;Q9C0H2-4;Q9C0H2-3;H7C3T6	Protein tweety homolog 3	TTYH3	>sp|Q9C0H2-2|TTYH3_HUMAN Isoform 2 of Protein tweety homolog 3 OS=Homo sapiens GN=TTYH3;>sp|Q9C0H2|TTYH3_HUMAN Protein tweety homolog 3 OS=Homo sapiens GN=TTYH3 PE=1 SV=3;>tr|A0A024R816|A0A024R816_HUMAN Protein tweety homolog OS=Homo sapiens GN=TTYH3 PE=3	0.70658	3	0.98123	0.80082	0.5941	1.01913		1.24872		1.68322	+	1	1.24872
Q8N0U8;A8K0F7;Q8N0U8-2	Vitamin K epoxide reductase complex subunit 1-like protein 1	VKORC1L1	>sp|Q8N0U8|VKORL_HUMAN Vitamin K epoxide reductase complex subunit 1-like protein 1 OS=Homo sapiens GN=VKORC1L1 PE=1 SV=2;>tr|A8K0F7|A8K0F7_HUMAN cDNA FLJ76587, highly similar to Homo sapiens vitamin K epoxide reductase complex, subunit 1-like 1 (VKORC1L1)	0.70988	4	0.62245	0.81322	NaN	1.60655	+	1.22968		NaN		1	1.41812
Q13367-3;Q13367;Q13367-4;Q68CN5;B3KUS4;Q13367-2;F5GWU4	AP-3 complex subunit beta-2	AP3B2;DKFZp686D17136	>sp|Q13367-3|AP3B2_HUMAN Isoform 3 of AP-3 complex subunit beta-2 OS=Homo sapiens GN=AP3B2;>sp|Q13367|AP3B2_HUMAN AP-3 complex subunit beta-2 OS=Homo sapiens GN=AP3B2 PE=1 SV=2;>sp|Q13367-4|AP3B2_HUMAN Isoform 4 of AP-3 complex subunit beta-2 OS=Homo sapie	0.71228	12	0.69313	0.77449	0.81347	1.44273	+	1.29117		1.2293		1	1.29117
B4DPP5;Q6P2C8;A0A024R8B7;Q6P2C8-2;Q6P2C8-4;U4Q365	Mediator of RNA polymerase II transcription subunit 27	MED27	>tr|B4DPP5|B4DPP5_HUMAN cDNA FLJ59157, highly similar to CRSP complex subunit 8 OS=Homo sapiens PE=2 SV=1;>sp|Q6P2C8|MED27_HUMAN Mediator of RNA polymerase II transcription subunit 27 OS=Homo sapiens GN=MED27 PE=1 SV=1;>tr|A0A024R8B7|A0A024R8B7_HUMAN Cofac	0.71562	3	NaN	NaN	0.41449	NaN		NaN		2.4126	+	1	2.4126
G5E9A6;Q6P453;P51784;B3KP28;B4DGK3;Q5JXD3	Ubiquitin carboxyl-terminal hydrolase;Ubiquitin carboxyl-terminal hydrolase 11	USP11	>tr|G5E9A6|G5E9A6_HUMAN Ubiquitin carboxyl-terminal hydrolase OS=Homo sapiens GN=USP11 PE=1 SV=1;>tr|Q6P453|Q6P453_HUMAN Ubiquitin carboxyl-terminal hydrolase (Fragment) OS=Homo sapiens GN=USP11 PE=2 SV=1;>sp|P51784|UBP11_HUMAN Ubiquitin carboxyl-terminal	0.71828	6	0.7159	NaN	0.88219	1.39684	+	NaN		1.13354		1	1.26519
B4DP10;U3KQ30;O15126;A8K2G0;Q96AZ4;O15126-2;B4E2V7	Secretory carrier-associated membrane protein 1	SCAMP1	>tr|B4DP10|B4DP10_HUMAN cDNA FLJ55118, highly similar to Secretory carrier-associated membrane protein 1 OS=Homo sapiens PE=2 SV=1;>tr|U3KQ30|U3KQ30_HUMAN Secretory carrier-associated membrane protein 1 OS=Homo sapiens GN=SCAMP1 PE=1 SV=1;>sp|O15126|SCAM1_	0.71962	8	0.66797	0.93698	NaN	1.49707	+	1.06726		NaN		1	1.28217
Q9HC36;I3L443	RNA methyltransferase-like protein 1	RNMTL1	>sp|Q9HC36|RMTL1_HUMAN RNA methyltransferase-like protein 1 OS=Homo sapiens GN=RNMTL1 PE=1 SV=2;>tr|I3L443|I3L443_HUMAN RNA methyltransferase-like protein 1 (Fragment) OS=Homo sapiens GN=RNMTL1 PE=1 SV=1	0.72098	2	0.72098	NaN	NaN	1.387	+	NaN		NaN		1	1.387
Q9BXS6-4;Q9BXS6-6;Q9BXS6-3;Q9BXS6-5;Q9BXS6-2;Q9BXS6;A8K4B4;H0YKA7;Q9BXS6-7;E9PB35	Nucleolar and spindle-associated protein 1	NUSAP1	>sp|Q9BXS6-4|NUSAP_HUMAN Isoform 4 of Nucleolar and spindle-associated protein 1 OS=Homo sapiens GN=NUSAP1;>sp|Q9BXS6-6|NUSAP_HUMAN Isoform 6 of Nucleolar and spindle-associated protein 1 OS=Homo sapiens GN=NUSAP1;>sp|Q9BXS6-3|NUSAP_HUMAN Isoform 3 of Nucl	0.72108	3	NaN	0.70045	NaN	NaN		1.42765	+	NaN		1	1.42765
B4DIC3;H7C3T5;Q4ZG22;F5GXM9;B4DUR6;Q9UPQ3-2;B2RZG9;X5D293;Q9UPQ3;E7EUN2	Arf-GAP with GTPase, ANK repeat and PH domain-containing protein 1	AGAP1;CENTG2	>tr|B4DIC3|B4DIC3_HUMAN cDNA FLJ57841, highly similar to Centaurin-gamma 2 OS=Homo sapiens PE=2 SV=1;>tr|H7C3T5|H7C3T5_HUMAN Arf-GAP with GTPase, ANK repeat and PH domain-containing protein 1 (Fragment) OS=Homo sapiens GN=AGAP1 PE=1 SV=1;>tr|Q4ZG22|Q4ZG22_	0.72119	3	NaN	0.65626	NaN	NaN		1.52379	+	NaN		1	1.52379
H7C022;Q8WVS4;A4D230	WD repeat-containing protein 60	WDR60;FLJ10300	>tr|H7C022|H7C022_HUMAN WD repeat-containing protein 60 (Fragment) OS=Homo sapiens GN=WDR60 PE=1 SV=1;>sp|Q8WVS4|WDR60_HUMAN WD repeat-containing protein 60 OS=Homo sapiens GN=WDR60 PE=1 SV=3;>tr|A4D230|A4D230_HUMAN Putative uncharacterized protein FLJ1030	0.72413	6	1.0424	0.4549	NaN	0.959325		2.19829	+	NaN		1	1.5788
J3KMX2;Q92925-3;B9EGA3;Q92925-2;Q92925;C9JYI7;B7ZA58;B7Z4U8;B3KXL9;Q6STE5-2;Q6STE5	SWI/SNF-related matrix-associated actin-dependent regulator of chromatin subfamily D member 2;SWI/SNF-related matrix-associated actin-dependent regulator of chromatin subfamily D member 3	SMARCD2;SMARCD3	>tr|J3KMX2|J3KMX2_HUMAN SWI/SNF-related matrix-associated actin-dependent regulator of chromatin subfamily D member 2 OS=Homo sapiens GN=SMARCD2 PE=1 SV=1;>sp|Q92925-3|SMRD2_HUMAN Isoform 3 of SWI/SNF-related matrix-associated actin-dependent regulator of	0.7243	3	0.70504	NaN	NaN	1.41836	+	NaN		NaN		1	1.41836
A0A024R6Q8;Q9NPI1;Q9NPI1-2	Bromodomain-containing protein 7	BRD7	>tr|A0A024R6Q8|A0A024R6Q8_HUMAN Bromodomain containing 7, isoform CRA_b OS=Homo sapiens GN=BRD7 PE=4 SV=1;>sp|Q9NPI1|BRD7_HUMAN Bromodomain-containing protein 7 OS=Homo sapiens GN=BRD7 PE=1 SV=1;>sp|Q9NPI1-2|BRD7_HUMAN Isoform 2 of Bromodomain-containing p	0.72449	4	0.66271	NaN	NaN	1.50896	+	NaN		NaN		1	1.50896
Q9NR28-2;Q502X2;Q9NR28;A0A024RBT2;K7X1S0;F5H796;Q9NR28-3;Q53HB7;F5GXT8;H7BZK7;F5H0Q4;F5GYH3;F5GX50	Diablo homolog, mitochondrial	DIABLO	>sp|Q9NR28-2|DBLOH_HUMAN Isoform 2 of Diablo homolog, mitochondrial OS=Homo sapiens GN=DIABLO;>tr|Q502X2|Q502X2_HUMAN Diablo homolog (Drosophila) OS=Homo sapiens GN=DIABLO PE=2 SV=1;>sp|Q9NR28|DBLOH_HUMAN Diablo homolog, mitochondrial OS=Homo sapiens GN=DI	0.72461	11	0.67567	0.81538	0.77449	1.48001	+	1.22642		1.29117		1	1.29117
Q2VPK5-3;Q2VPK5;H3BSW6;H3BPG4;Q2VPK5-5	Cytoplasmic tRNA 2-thiolation protein 2	CTU2	>sp|Q2VPK5-3|CTU2_HUMAN Isoform 2 of Cytoplasmic tRNA 2-thiolation protein 2 OS=Homo sapiens GN=CTU2;>sp|Q2VPK5|CTU2_HUMAN Cytoplasmic tRNA 2-thiolation protein 2 OS=Homo sapiens GN=CTU2 PE=1 SV=1;>tr|H3BSW6|H3BSW6_HUMAN Cytoplasmic tRNA 2-thiolation prote	0.72535	4	0.72535	NaN	NaN	1.37864	+	NaN		NaN		1	1.37864
P62277;J3KMX5;E9PS50	40S ribosomal protein S13	RPS13	>sp|P62277|RS13_HUMAN 40S ribosomal protein S13 OS=Homo sapiens GN=RPS13 PE=1 SV=2;>tr|J3KMX5|J3KMX5_HUMAN 40S ribosomal protein S13 OS=Homo sapiens GN=RPS13 PE=1 SV=1;>tr|E9PS50|E9PS50_HUMAN 40S ribosomal protein S13 (Fragment) OS=Homo sapiens GN=RPS13 PE	0.72697	142	0.9635	0.7215	1.009	1.03788		1.386	+	0.99108		1	1.03788
Q9P013;A0A024R3B4;A0A024R3C8;U3KQ79	Spliceosome-associated protein CWC15 homolog	CWC15	>sp|Q9P013|CWC15_HUMAN Spliceosome-associated protein CWC15 homolog OS=Homo sapiens GN=CWC15 PE=1 SV=2;>tr|A0A024R3B4|A0A024R3B4_HUMAN Uncharacterized protein OS=Homo sapiens GN=HSPC148 PE=4 SV=1;>tr|A0A024R3C8|A0A024R3C8_HUMAN Uncharacterized protein OS=H	0.72701	5	0.58222	1.0515	NaN	1.71756	+	0.951022		NaN		1	1.33429
O75054;O75054-2	Immunoglobulin superfamily member 3	IGSF3	>sp|O75054|IGSF3_HUMAN Immunoglobulin superfamily member 3 OS=Homo sapiens GN=IGSF3 PE=2 SV=3;>sp|O75054-2|IGSF3_HUMAN Isoform 2 of Immunoglobulin superfamily member 3 OS=Homo sapiens GN=IGSF3	0.7276	3	0.80973	0.57673	0.90081	1.23498		1.73391	+	1.11011		1	1.23498
H0YLN8;Q96QT4;A0A024R5V1	Transient receptor potential cation channel subfamily M member 7	TRPM7	>tr|H0YLN8|H0YLN8_HUMAN Transient receptor potential cation channel subfamily M member 7 OS=Homo sapiens GN=TRPM7 PE=1 SV=1;>sp|Q96QT4|TRPM7_HUMAN Transient receptor potential cation channel subfamily M member 7 OS=Homo sapiens GN=TRPM7 PE=1 SV=1;>tr|A0A02	0.72965	2	0.72965	NaN	NaN	1.37052	+	NaN		NaN		1	1.37052
O14967;A8K454;D6RAZ4;B4DRG2;O14967-2	Calmegin	CLGN	>sp|O14967|CLGN_HUMAN Calmegin OS=Homo sapiens GN=CLGN PE=1 SV=1;>tr|A8K454|A8K454_HUMAN cDNA FLJ78187, highly similar to Homo sapiens calmegin, mRNA OS=Homo sapiens PE=2 SV=1;>tr|D6RAZ4|D6RAZ4_HUMAN Calmegin (Fragment) OS=Homo sapiens GN=CLGN PE=3 SV=1;>t	0.73277	3	0.49418	NaN	NaN	2.02355	+	NaN		NaN		1	2.02355
E9PLW2;Q8N573-7;Q8N573-4;B7Z833;Q8N573-6;H0YC07;Q8N573-2;Q8N573-5;Q8N573-8;Q8N573	Oxidation resistance protein 1	OXR1	>tr|E9PLW2|E9PLW2_HUMAN Oxidation resistance protein 1 OS=Homo sapiens GN=OXR1 PE=1 SV=1;>sp|Q8N573-7|OXR1_HUMAN Isoform 7 of Oxidation resistance protein 1 OS=Homo sapiens GN=OXR1;>sp|Q8N573-4|OXR1_HUMAN Isoform 4 of Oxidation resistance protein 1 OS=Homo	0.73753	4	NaN	0.24252	NaN	NaN		4.12337	+	NaN		1	4.12337
C9J3Q3;C9J6N5;C9JQ40;C9JW51;Q9H098;X6RET8;C9JP05;Q9H098-2;F8WCJ2;C9JYP1;C9J6Y8	Protein FAM107B	FAM107B	>tr|C9J3Q3|C9J3Q3_HUMAN Protein FAM107B (Fragment) OS=Homo sapiens GN=FAM107B PE=1 SV=1;>tr|C9J6N5|C9J6N5_HUMAN Protein FAM107B (Fragment) OS=Homo sapiens GN=FAM107B PE=1 SV=2;>tr|C9JQ40|C9JQ40_HUMAN Protein FAM107B (Fragment) OS=Homo sapiens GN=FAM107B PE	0.73868	6	0.53783	0.91561	0.83508	1.85932	+	1.09217		1.19749		1	1.19749
O43660-2;O43660;A8MW61;H0YAA2;H0YA24	Pleiotropic regulator 1	PLRG1	>sp|O43660-2|PLRG1_HUMAN Isoform 2 of Pleiotropic regulator 1 OS=Homo sapiens GN=PLRG1;>sp|O43660|PLRG1_HUMAN Pleiotropic regulator 1 OS=Homo sapiens GN=PLRG1 PE=1 SV=1;>tr|A8MW61|A8MW61_HUMAN Pleiotropic regulator 1 OS=Homo sapiens GN=PLRG1 PE=4 SV=1	0.73917	5	NaN	NaN	0.69934	NaN		NaN		1.42992	+	1	1.42992
B2RDT9;Q96NB3	Zinc finger protein 830	ZNF830	>tr|B2RDT9|B2RDT9_HUMAN cDNA, FLJ96765 OS=Homo sapiens PE=2 SV=1;>sp|Q96NB3|ZN830_HUMAN Zinc finger protein 830 OS=Homo sapiens GN=ZNF830 PE=1 SV=2	0.73922	4	NaN	NaN	0.68379	NaN		NaN		1.46244	+	1	1.46244
J3KNV1;O60281;O60281-2;Q3MN16;Q6P495;E5RFE6;H0YAU0;Q6ZW83;Q3LIB3	Zinc finger protein 292	ZNF292	>tr|J3KNV1|J3KNV1_HUMAN Zinc finger protein 292 OS=Homo sapiens GN=ZNF292 PE=1 SV=1;>sp|O60281|ZN292_HUMAN Zinc finger protein 292 OS=Homo sapiens GN=ZNF292 PE=1 SV=3;>sp|O60281-2|ZN292_HUMAN Isoform 2 of Zinc finger protein 292 OS=Homo sapiens GN=ZNF292	0.73939	10	0.75621	0.88451	0.69542	1.32238		1.13057		1.43798	+	1	1.32238
F8VX58;P07585-4;F8VXZ8;F8VUF6;F8VWU0;Q6FH10;P07585	Decorin	DCN	>tr|F8VX58|F8VX58_HUMAN Decorin (Fragment) OS=Homo sapiens GN=DCN PE=4 SV=1;>sp|P07585-4|PGS2_HUMAN Isoform D of Decorin OS=Homo sapiens GN=DCN;>tr|F8VXZ8|F8VXZ8_HUMAN Decorin (Fragment) OS=Homo sapiens GN=DCN PE=4 SV=1;>tr|F8VUF6|F8VUF6_HUMAN Decorin (Fra	0.74045	3	0.57759	NaN	NaN	1.73133	+	NaN		NaN		1	1.73133
E9PFW8;B4E3V2;Q13501-2;E7EMC7;Q13501;E3WH17	Sequestosome-1;Tyrosine-protein kinase receptor	SQSTM1;SQSTM1-ALK	>tr|E9PFW8|E9PFW8_HUMAN Sequestosome-1 (Fragment) OS=Homo sapiens GN=SQSTM1 PE=1 SV=1;>tr|B4E3V2|B4E3V2_HUMAN cDNA FLJ52854, highly similar to Sequestosome-1 OS=Homo sapiens PE=2 SV=1;>sp|Q13501-2|SQSTM_HUMAN Isoform 2 of Sequestosome-1 OS=Homo sapiens GN=	0.7405	4	0.84275	0.73513	0.80154	1.18659		1.3603	+	1.2476		1	1.2476
Q6P9B9	Integrator complex subunit 5	INTS5	>sp|Q6P9B9|INT5_HUMAN Integrator complex subunit 5 OS=Homo sapiens GN=INTS5 PE=1 SV=1	0.74167	3	NaN	0.83182	0.63261	NaN		1.20218		1.58075	+	1	1.39147
B2R8G6;Q14318;A0A024R7P2;Q14318-2;J3KQ73;B7Z6M0;U3KQ64;Q14318-3;U3KQI1;M0R2K9	Peptidyl-prolyl cis-trans isomerase FKBP8	FKBP8	>tr|B2R8G6|B2R8G6_HUMAN cDNA, FLJ93891, Homo sapiens FK506 binding protein 8, 38kDa (FKBP8), mRNA OS=Homo sapiens PE=2 SV=1;>sp|Q14318|FKBP8_HUMAN Peptidyl-prolyl cis-trans isomerase FKBP8 OS=Homo sapiens GN=FKBP8 PE=1 SV=2;>tr|A0A024R7P2|A0A024R7P2_HUMAN	0.74254	7	0.76781	0.82355	0.74254	1.30241		1.21426		1.34673	+	1	1.30241
Q9Y657;A0A024R297;Q5JUX0;Q5JZB8;Q9BPZ2;Q99865;A0A024R9Y9;A0A024R9W1	Spindlin-1;Spindlin-3	SPIN1;SPIN3	>sp|Q9Y657|SPIN1_HUMAN Spindlin-1 OS=Homo sapiens GN=SPIN1 PE=1 SV=3;>tr|A0A024R297|A0A024R297_HUMAN Spindlin, isoform CRA_a OS=Homo sapiens GN=SPIN PE=4 SV=1;>sp|Q5JUX0|SPIN3_HUMAN Spindlin-3 OS=Homo sapiens GN=SPIN3 PE=1 SV=1	0.74446	3	0.74271	NaN	NaN	1.34642	+	NaN		NaN		1	1.34642
Q12906-4;Q12906-6;Q12906-7;F4ZW66	Interleukin enhancer-binding factor 3	ILF3	>sp|Q12906-4|ILF3_HUMAN Isoform 4 of Interleukin enhancer-binding factor 3 OS=Homo sapiens GN=ILF3;>sp|Q12906-6|ILF3_HUMAN Isoform 6 of Interleukin enhancer-binding factor 3 OS=Homo sapiens GN=ILF3;>sp|Q12906-7|ILF3_HUMAN Isoform 7 of Interleukin enhancer-	0.74647	4	NaN	NaN	0.74647	NaN		NaN		1.33964	+	1	1.33964
Q5VWN6;Q5VWN6-2;Q6IPC8	Protein FAM208B	FAM208B	>sp|Q5VWN6|F208B_HUMAN Protein FAM208B OS=Homo sapiens GN=FAM208B PE=1 SV=1;>sp|Q5VWN6-2|F208B_HUMAN Isoform 2 of Protein FAM208B OS=Homo sapiens GN=FAM208B	0.74702	5	0.34169	NaN	0.80445	2.92663	+	NaN		1.24309		1	2.08486
O75521-2;Q6IBN4;Q53HG3;Q53GC8;A0A024QZU5;O75521;B4DLL3;F1LLU7;C9J000;Q59E94;F8WAW4;F8W6J1;Q9NYD2;C9JB63	Enoyl-CoA delta isomerase 2, mitochondrial	ECI2;PECI	>sp|O75521-2|ECI2_HUMAN Isoform 2 of Enoyl-CoA delta isomerase 2, mitochondrial OS=Homo sapiens GN=ECI2;>tr|Q6IBN4|Q6IBN4_HUMAN PECI protein OS=Homo sapiens GN=PECI PE=2 SV=1;>tr|Q53HG3|Q53HG3_HUMAN Peroxisomal D3,D2-enoyl-CoA isomerase isoform 1 variant (	0.74762	3	0.73337	1.0862	NaN	1.36357	+	0.920641		NaN		1	1.1421
Q86VM9-2;E7ERS3;B4DTK7;Q86VM9;B4DZ24;H3BRN6;H3BPD0;Q86YU5	Zinc finger CCCH domain-containing protein 18	ZC3H18	>sp|Q86VM9-2|ZCH18_HUMAN Isoform 2 of Zinc finger CCCH domain-containing protein 18 OS=Homo sapiens GN=ZC3H18;>tr|E7ERS3|E7ERS3_HUMAN Zinc finger CCCH domain-containing protein 18 OS=Homo sapiens GN=ZC3H18 PE=1 SV=1;>tr|B4DTK7|B4DTK7_HUMAN cDNA FLJ61387, h	0.7485	19	0.73017	0.7818	0.82056	1.36954	+	1.2791		1.21868		1	1.2791
Q53ZP9;O95757;E7ES43;E9PDE8;B4DXT2;B4DZR0;D6RJ96;B3KNM0	Heat shock 70 kDa protein 4L	HSPA4L	>tr|Q53ZP9|Q53ZP9_HUMAN Heat shock protein apg-1 OS=Homo sapiens PE=2 SV=1;>sp|O95757|HS74L_HUMAN Heat shock 70 kDa protein 4L OS=Homo sapiens GN=HSPA4L PE=1 SV=3;>tr|E7ES43|E7ES43_HUMAN Heat shock 70 kDa protein 4L OS=Homo sapiens GN=HSPA4L PE=1 SV=2;>tr|	0.74892	14	0.74928	0.72776	0.80371	1.33461		1.37408	+	1.24423		1	1.33461
P16930;P16930-2;H0YLC7;B7Z4W2	Fumarylacetoacetase	FAH	>sp|P16930|FAAA_HUMAN Fumarylacetoacetase OS=Homo sapiens GN=FAH PE=1 SV=2;>sp|P16930-2|FAAA_HUMAN Isoform 2 of Fumarylacetoacetase OS=Homo sapiens GN=FAH;>tr|H0YLC7|H0YLC7_HUMAN Fumarylacetoacetase (Fragment) OS=Homo sapiens GN=FAH PE=1 SV=1;>tr|B7Z4W2|B7	0.75145	7	0.74538	NaN	NaN	1.3416	+	NaN		NaN		1	1.3416
B2R6Y2;P51687;A0A024RB79;D6QX84	Sulfite oxidase, mitochondrial	SUOX	>tr|B2R6Y2|B2R6Y2_HUMAN cDNA, FLJ93173, Homo sapiens sulfite oxidase (SUOX), nuclear gene encodingmitochondrial protein, mRNA OS=Homo sapiens PE=2 SV=1;>sp|P51687|SUOX_HUMAN Sulfite oxidase, mitochondrial OS=Homo sapiens GN=SUOX PE=1 SV=2;>tr|A0A024RB79|A0	0.75285	4	0.67045	NaN	NaN	1.49154	+	NaN		NaN		1	1.49154
Q96KB7;Q9ULV3-5;Q9ULV3-3;Q9BTG3;Q9ULV3-4;Q5SYW2;Q9ULV3;A0A024R885;F5H2X7;B7Z3U7;F6VD24;H0Y5D5;B4E0A3;Q9ULV3-2	Cip1-interacting zinc finger protein	CIZ1	>tr|Q96KB7|Q96KB7_HUMAN Uncharacterized protein OS=Homo sapiens GN=CIZ1 PE=1 SV=1;>sp|Q9ULV3-5|CIZ1_HUMAN Isoform 5 of Cip1-interacting zinc finger protein OS=Homo sapiens GN=CIZ1;>sp|Q9ULV3-3|CIZ1_HUMAN Isoform 3 of Cip1-interacting zinc finger protein OS	0.75344	5	0.83921	0.74989	NaN	1.1916		1.33353	+	NaN		1	1.26256
Q9UNW9;F8VYI3;I3L2B5;F8VWX1;P51513-2;F8W659;J3KQU3;P51513-5;P51513-3;P51513-4;A8K603;P51513	RNA-binding protein Nova-2;RNA-binding protein Nova-1	NOVA2;NOVA1	>sp|Q9UNW9|NOVA2_HUMAN RNA-binding protein Nova-2 OS=Homo sapiens GN=NOVA2 PE=1 SV=1;>tr|F8VYI3|F8VYI3_HUMAN RNA-binding protein Nova-1 OS=Homo sapiens GN=NOVA1 PE=4 SV=1;>tr|I3L2B5|I3L2B5_HUMAN RNA-binding protein Nova-1 OS=Homo sapiens GN=NOVA1 PE=4 SV=1	0.75359	6	0.75394	0.79125	0.71164	1.32637		1.26382		1.4052	+	1	1.32637
Q9Y3Q3;Q9UMB6;Q8N2D9;G3V1J9;F5H4M7;B4E277;Q9Y3Q3-2;Q53HR4	Transmembrane emp24 domain-containing protein 3	TMED3	>sp|Q9Y3Q3|TMED3_HUMAN Transmembrane emp24 domain-containing protein 3 OS=Homo sapiens GN=TMED3 PE=1 SV=1;>tr|Q9UMB6|Q9UMB6_HUMAN p24B protein (Fragment) OS=Homo sapiens PE=2 SV=1;>tr|Q8N2D9|Q8N2D9_HUMAN cDNA PSEC0228 fis, clone HEMBA1006099, weakly simila	0.75414	3	NaN	0.71197	NaN	NaN		1.40455	+	NaN		1	1.40455
Q6PL18;A0A024R9G7;Q6PL18-2	ATPase family AAA domain-containing protein 2	ATAD2	>sp|Q6PL18|ATAD2_HUMAN ATPase family AAA domain-containing protein 2 OS=Homo sapiens GN=ATAD2 PE=1 SV=1;>tr|A0A024R9G7|A0A024R9G7_HUMAN ATPase family, AAA domain containing 2, isoform CRA_c OS=Homo sapiens GN=ATAD2 PE=3 SV=1	0.75456	6	0.76144	0.74775	0.91858	1.3133		1.33735	+	1.08864		1	1.3133
B4DWS6;Q53GQ0;D3DR22;B3KQJ0;E9PI21	Estradiol 17-beta-dehydrogenase 12	HSD17B12	>tr|B4DWS6|B4DWS6_HUMAN cDNA FLJ61181, highly similar to Homo sapiens hydroxysteroid (17-beta) dehydrogenase 12 (HSD17B12), mRNA OS=Homo sapiens PE=2 SV=1;>sp|Q53GQ0|DHB12_HUMAN Estradiol 17-beta-dehydrogenase 12 OS=Homo sapiens GN=HSD17B12 PE=1 SV=2;>tr|D	0.75514	10	0.75514	0.89321	0.70371	1.32426		1.11956		1.42104	+	1	1.32426
Q6PK04;I3L0U5;H6QX63	Coiled-coil domain-containing protein 137	CCDC137	>sp|Q6PK04|CC137_HUMAN Coiled-coil domain-containing protein 137 OS=Homo sapiens GN=CCDC137 PE=1 SV=1;>tr|I3L0U5|I3L0U5_HUMAN Coiled-coil domain-containing protein 137 (Fragment) OS=Homo sapiens GN=CCDC137 PE=1 SV=1;>tr|H6QX63|H6QX63_HUMAN Hepatocellular c	0.75554	3	0.67485	NaN	NaN	1.48181	+	NaN		NaN		1	1.48181
V9GYD0;P36404-2;Q53YD8;P36404;B4DGG0	ADP-ribosylation factor-like protein 2	ARL2;hCG_23373	>tr|V9GYD0|V9GYD0_HUMAN Sorting nexin-15 OS=Homo sapiens GN=SNX15 PE=4 SV=1;>sp|P36404-2|ARL2_HUMAN Isoform 2 of ADP-ribosylation factor-like protein 2 OS=Homo sapiens GN=ARL2;>tr|Q53YD8|Q53YD8_HUMAN ADP-ribosylation factor-like 2 OS=Homo sapiens GN=hCG_23	0.75583	5	NaN	0.75583	0.89638	NaN		1.32305	+	1.1156		1	1.21932
Q63ZY3-3;Q63ZY3;Q63ZY3-2;K7EIU4;Q9NXX5	KN motif and ankyrin repeat domain-containing protein 2	KANK2	>sp|Q63ZY3-3|KANK2_HUMAN Isoform 3 of KN motif and ankyrin repeat domain-containing protein 2 OS=Homo sapiens GN=KANK2;>sp|Q63ZY3|KANK2_HUMAN KN motif and ankyrin repeat domain-containing protein 2 OS=Homo sapiens GN=KANK2 PE=1 SV=1;>sp|Q63ZY3-2|KANK2_HUMA	0.75597	4	0.99181	NaN	0.67823	1.00826		NaN		1.47443	+	1	1.24134
B4DXD8;Q92889	DNA repair endonuclease XPF	ERCC4	>tr|B4DXD8|B4DXD8_HUMAN cDNA FLJ51369, highly similar to DNA repair endonuclease XPF (EC 3.1.-.-) OS=Homo sapiens PE=2 SV=1;>sp|Q92889|XPF_HUMAN DNA repair endonuclease XPF OS=Homo sapiens GN=ERCC4 PE=1 SV=3	0.75725	5	NaN	0.73046	NaN	NaN		1.369	+	NaN		1	1.369
Q9UDT6-2;A7E2F7;Q9UDT6	CAP-Gly domain-containing linker protein 2	CLIP2	>sp|Q9UDT6-2|CLIP2_HUMAN Isoform 2 of CAP-Gly domain-containing linker protein 2 OS=Homo sapiens GN=CLIP2;>tr|A7E2F7|A7E2F7_HUMAN CAP-GLY domain containing linker protein 2 OS=Homo sapiens GN=CLIP2 PE=2 SV=1;>sp|Q9UDT6|CLIP2_HUMAN CAP-Gly domain-containing	0.75819	4	0.9958	0.67021	NaN	1.00422		1.49207	+	NaN		1	1.24814
Q71N00			>tr|Q71N00|Q71N00_HUMAN C75F OS=Homo sapiens PE=2 SV=1	0.75885	5	NaN	0.65196	0.82769	NaN		1.53384	+	1.20818		1	1.37101
H0YEL0;O14893-3;O14893-2;O14893;H0YDP6;G5EA29	Gem-associated protein 2	GEMIN2	>tr|H0YEL0|H0YEL0_HUMAN Gem-associated protein 2 (Fragment) OS=Homo sapiens GN=GEMIN2 PE=1 SV=1;>sp|O14893-3|GEMI2_HUMAN Isoform 3 of Gem-associated protein 2 OS=Homo sapiens GN=GEMIN2;>sp|O14893-2|GEMI2_HUMAN Isoform 2 of Gem-associated protein 2 OS=Homo	0.75891	7	0.75891	0.75432	0.83454	1.31768		1.3257	+	1.19826		1	1.31768
Q96SI9-2;V9HWK4;Q96SI9	Spermatid perinuclear RNA-binding protein	STRBP	>sp|Q96SI9-2|STRBP_HUMAN Isoform 2 of Spermatid perinuclear RNA-binding protein OS=Homo sapiens GN=STRBP;>tr|V9HWK4|V9HWK4_HUMAN Epididymis luminal protein 162 OS=Homo sapiens GN=HEL162 PE=2 SV=1;>sp|Q96SI9|STRBP_HUMAN Spermatid perinuclear RNA-binding pro	0.75903	10	0.76608	0.84568	0.67706	1.30535		1.18248		1.47697	+	1	1.30535
Q9HCG4;Q8TEH3;Q8TEH3-7;Q8TEH3-6;Q8TEH3-4;Q8TEH3-3;Q8TEH3-5;Q8TEH3-2	DENN domain-containing protein 1A	KIAA1608;DENND1A	>tr|Q9HCG4|Q9HCG4_HUMAN KIAA1608 protein (Fragment) OS=Homo sapiens GN=KIAA1608 PE=2 SV=2;>sp|Q8TEH3|DEN1A_HUMAN DENN domain-containing protein 1A OS=Homo sapiens GN=DENND1A PE=1 SV=2;>sp|Q8TEH3-7|DEN1A_HUMAN Isoform 7 of DENN domain-containing protein 1A	0.76071	4	NaN	0.98441	0.74883	NaN		1.01584		1.33542	+	1	1.17563
Q9H425-3;Q9H425;A0A024R3S1;E5RFY9;E5RI90;Q9H425-2	Uncharacterized protein C1orf198	C1orf198	>sp|Q9H425-3|CA198_HUMAN Isoform 3 of Uncharacterized protein C1orf198 OS=Homo sapiens GN=C1orf198;>sp|Q9H425|CA198_HUMAN Uncharacterized protein C1orf198 OS=Homo sapiens GN=C1orf198 PE=1 SV=1;>tr|A0A024R3S1|A0A024R3S1_HUMAN Chromosome 1 open reading frame	0.76086	4	0.70858	0.78033	0.97199	1.41127	+	1.28151		1.02882		1	1.28151
Q14181;B3KSX6;B4DNB4	DNA polymerase alpha subunit B	POLA2	>sp|Q14181|DPOA2_HUMAN DNA polymerase alpha subunit B OS=Homo sapiens GN=POLA2 PE=1 SV=2;>tr|B3KSX6|B3KSX6_HUMAN cDNA FLJ37250 fis, clone BRAMY2006809, highly similar to DNA polymerase subunit alpha B OS=Homo sapiens PE=2 SV=1;>tr|B4DNB4|B4DNB4_HUMAN DNA p	0.76124	5	0.82918	0.6605	0.77414	1.20601		1.514	+	1.29176		1	1.29176
Q562F1;B4DK79;Q15345-3;Q15345;Q53F69;Q9H822	Leucine-rich repeat-containing protein 41	LRRC41	>tr|Q562F1|Q562F1_HUMAN LRRC41 protein (Fragment) OS=Homo sapiens GN=LRRC41 PE=2 SV=1;>tr|B4DK79|B4DK79_HUMAN cDNA FLJ58742, highly similar to Leucine-rich repeat-containing protein 41 OS=Homo sapiens PE=2 SV=1;>sp|Q15345-3|LRC41_HUMAN Isoform 3 of Leucine	0.76148	4	0.73895	0.78434	0.90447	1.35327	+	1.27496		1.10562		1	1.27496
Q96ER9-2;A0A024R2V4;Q96ER9	Coiled-coil domain-containing protein 51	CCDC51	>sp|Q96ER9-2|CCD51_HUMAN Isoform 2 of Coiled-coil domain-containing protein 51 OS=Homo sapiens GN=CCDC51;>tr|A0A024R2V4|A0A024R2V4_HUMAN Coiled-coil domain containing 51, isoform CRA_a OS=Homo sapiens GN=CCDC51 PE=4 SV=1;>sp|Q96ER9|CCD51_HUMAN Coiled-coil	0.76186	6	0.71495	0.78332	0.82461	1.3987	+	1.27662		1.21269		1	1.27662
Q53X93;P16220-2;Q5U0J5;P16220;H7C1R5;C9JBT4;C9J896;Q4ZG78	Cyclic AMP-responsive element-binding protein 1	CREB1	>tr|Q53X93|Q53X93_HUMAN CREB1 protein (Fragment) OS=Homo sapiens GN=CREB1 PE=2 SV=1;>sp|P16220-2|CREB1_HUMAN Isoform CREB-B of Cyclic AMP-responsive element-binding protein 1 OS=Homo sapiens GN=CREB1;>tr|Q5U0J5|Q5U0J5_HUMAN cAMP responsive element binding	0.76266	4	NaN	NaN	0.70811	NaN		NaN		1.41221	+	1	1.41221
P11388;P11388-2;P11388-3;P11388-4;J3KTB7	DNA topoisomerase 2-alpha	TOP2A	>sp|P11388|TOP2A_HUMAN DNA topoisomerase 2-alpha OS=Homo sapiens GN=TOP2A PE=1 SV=3;>sp|P11388-2|TOP2A_HUMAN Isoform 2 of DNA topoisomerase 2-alpha OS=Homo sapiens GN=TOP2A;>sp|P11388-3|TOP2A_HUMAN Isoform 3 of DNA topoisomerase 2-alpha OS=Homo sapiens GN=	0.76294	10	0.71331	0.84692	0.88214	1.40192	+	1.18075		1.13361		1	1.18075
Q9Y3E5;Q96ME4;J3KQ48	Peptidyl-tRNA hydrolase 2, mitochondrial	PTRH2	>sp|Q9Y3E5|PTH2_HUMAN Peptidyl-tRNA hydrolase 2, mitochondrial OS=Homo sapiens GN=PTRH2 PE=1 SV=1;>tr|Q96ME4|Q96ME4_HUMAN cDNA FLJ32471 fis, clone SKNMC2000322, highly similar to Peptidyl-tRNA hydrolase 2, mitochondrial (EC 3.1.1.29) OS=Homo sapiens PE=2 S	0.76415	10	0.76492	0.74808	0.76423	1.30733		1.33676	+	1.30851		1	1.30851
Q99523-2;Q99523;A8KAQ3	Sortilin	SORT1	>sp|Q99523-2|SORT_HUMAN Isoform 2 of Sortilin OS=Homo sapiens GN=SORT1;>sp|Q99523|SORT_HUMAN Sortilin OS=Homo sapiens GN=SORT1 PE=1 SV=3;>tr|A8KAQ3|A8KAQ3_HUMAN cDNA FLJ76489, highly similar to Homo sapiens sortilin 1 (SORT1), mRNA OS=Homo sapiens PE=2 SV=	0.76462	4	NaN	0.76462	NaN	NaN		1.30784	+	NaN		1	1.30784
Q5T8P6;Q5T8P6-4	RNA-binding protein 26	RBM26	>sp|Q5T8P6|RBM26_HUMAN RNA-binding protein 26 OS=Homo sapiens GN=RBM26 PE=1 SV=3;>sp|Q5T8P6-4|RBM26_HUMAN Isoform 4 of RNA-binding protein 26 OS=Homo sapiens GN=RBM26	0.76642	13	0.80907	0.80075	0.73422	1.23599		1.24883		1.36199	+	1	1.24883
Q15111;Q15111-2;H3BUD4;B4DYZ4;F8WAR2	Inactive phospholipase C-like protein 1	PLCL1	>sp|Q15111|PLCL1_HUMAN Inactive phospholipase C-like protein 1 OS=Homo sapiens GN=PLCL1 PE=1 SV=3;>sp|Q15111-2|PLCL1_HUMAN Isoform 2 of Inactive phospholipase C-like protein 1 OS=Homo sapiens GN=PLCL1;>tr|H3BUD4|H3BUD4_HUMAN Phosphoinositide phospholipase	0.76752	7	0.83242	0.71925	0.76752	1.20132		1.39034	+	1.3029		1	1.3029
Q96RS6;Q96RS6-3;Q96RS6-2;E5RGX7	NudC domain-containing protein 1	NUDCD1	>sp|Q96RS6|NUDC1_HUMAN NudC domain-containing protein 1 OS=Homo sapiens GN=NUDCD1 PE=1 SV=2;>sp|Q96RS6-3|NUDC1_HUMAN Isoform 3 of NudC domain-containing protein 1 OS=Homo sapiens GN=NUDCD1;>sp|Q96RS6-2|NUDC1_HUMAN Isoform 2 of NudC domain-containing protei	0.76765	9	0.69176	0.88117	0.86367	1.44559	+	1.13485		1.15785		1	1.15785
C9JE98;C9J239;Q9Y618-5;A0A024RBU9;C9J0Q5;Q9Y618-4;C9JFD3;Q9Y618-3;A0A024RBS3;Q9Y618;C9JQE8;C9J7T7;H7C184;H7C1Y3;H0YGK8;C9J330;Q9BT61;Q9Y618-2	Nuclear receptor corepressor 2	NCOR2	>tr|C9JE98|C9JE98_HUMAN Nuclear receptor corepressor 2 OS=Homo sapiens GN=NCOR2 PE=1 SV=1;>tr|C9J239|C9J239_HUMAN Nuclear receptor corepressor 2 OS=Homo sapiens GN=NCOR2 PE=1 SV=1;>sp|Q9Y618-5|NCOR2_HUMAN Isoform 5 of Nuclear receptor corepressor 2 OS=Homo	0.7687	7	0.84665	0.80168	0.74975	1.18113		1.24738		1.33378	+	1	1.24738
Q59FF1;P18065	Insulin-like growth factor-binding protein 2	IGFBP2	>tr|Q59FF1|Q59FF1_HUMAN Insulin-like growth factor binding protein 2 variant (Fragment) OS=Homo sapiens PE=2 SV=1;>sp|P18065|IBP2_HUMAN Insulin-like growth factor-binding protein 2 OS=Homo sapiens GN=IGFBP2 PE=1 SV=2	0.76898	6	0.74386	NaN	0.84928	1.34434	+	NaN		1.17747		1	1.2609
P56385	ATP synthase subunit e, mitochondrial	ATP5I	>sp|P56385|ATP5I_HUMAN ATP synthase subunit e, mitochondrial OS=Homo sapiens GN=ATP5I PE=1 SV=2	0.76979	5	NaN	0.81879	0.74844	NaN		1.22131		1.33611	+	1	1.27871
B7ZMF1;B2RTQ2;Q9UPU7-2;Q9UPU7;C9JW56	TBC1 domain family member 2B	TBC1D2B	>tr|B7ZMF1|B7ZMF1_HUMAN TBC1D2B protein OS=Homo sapiens GN=TBC1D2B PE=2 SV=1;>tr|B2RTQ2|B2RTQ2_HUMAN TBC1 domain family, member 2B, isoform CRA_b OS=Homo sapiens GN=TBC1D2B PE=2 SV=1;>sp|Q9UPU7-2|TBD2B_HUMAN Isoform 2 of TBC1 domain family member 2B OS=Hom	0.77093	5	1.3581	0.7218	NaN	0.736323		1.38543	+	NaN		1	1.06087
Q9NQC3;Q9NQC3-2;Q9NQC3-5;Q9NQC3-4;F8WAM4;Q6IPN0;F8W914;Q9NQC3-6;Q53R94;Q3LIF4;Q53RF4;Q53SY1;Q9NQC3-3;A6XGP7;H7C106;D6W5C2	Reticulon-4	RTN4	>sp|Q9NQC3|RTN4_HUMAN Reticulon-4 OS=Homo sapiens GN=RTN4 PE=1 SV=2;>sp|Q9NQC3-2|RTN4_HUMAN Isoform 2 of Reticulon-4 OS=Homo sapiens GN=RTN4;>sp|Q9NQC3-5|RTN4_HUMAN Isoform 5 of Reticulon-4 OS=Homo sapiens GN=RTN4;>sp|Q9NQC3-4|RTN4_HUMAN Isoform 4 of Retic	0.77141	35	0.73299	0.91082	0.77141	1.36428	+	1.09791		1.29633		1	1.29633
Q96CV9-3;B7ZA56;B4E184;Q96CV9-2;Q96CV9;X6RKL2;H7C1H4	Optineurin	OPTN	>sp|Q96CV9-3|OPTN_HUMAN Isoform 3 of Optineurin OS=Homo sapiens GN=OPTN;>tr|B7ZA56|B7ZA56_HUMAN cDNA, FLJ79070, highly similar to Optineurin OS=Homo sapiens PE=2 SV=1;>tr|B4E184|B4E184_HUMAN cDNA FLJ53267, highly similar to Optineurin OS=Homo sapiens PE=2	0.7715	9	0.73137	0.7715	0.7868	1.3673	+	1.29618		1.27097		1	1.29618
Q5R3B4;O95563;B2R4Q7;A0A024R8Z5	Mitochondrial pyruvate carrier 2	MPC2	>tr|Q5R3B4|Q5R3B4_HUMAN Mitochondrial pyruvate carrier 2 (Fragment) OS=Homo sapiens GN=MPC2 PE=1 SV=1;>sp|O95563|MPC2_HUMAN Mitochondrial pyruvate carrier 2 OS=Homo sapiens GN=MPC2 PE=1 SV=1;>tr|B2R4Q7|B2R4Q7_HUMAN cDNA, FLJ92180, highly similar to Homo sa	0.77164	3	0.80942	0.75343	NaN	1.23545		1.32726	+	NaN		1	1.28136
Q92625;B4DQW8;Q05CP0	Ankyrin repeat and SAM domain-containing protein 1A	ANKS1A	>sp|Q92625|ANS1A_HUMAN Ankyrin repeat and SAM domain-containing protein 1A OS=Homo sapiens GN=ANKS1A PE=1 SV=4;>tr|B4DQW8|B4DQW8_HUMAN Ankyrin repeat and SAM domain-containing protein 1A OS=Homo sapiens GN=ANKS1A PE=1 SV=1;>tr|Q05CP0|Q05CP0_HUMAN ANKS1A pr	0.7724	4	NaN	0.70255	NaN	NaN		1.42339	+	NaN		1	1.42339
X6R9U5;O60858;A0A024RDU3;O60858-3	E3 ubiquitin-protein ligase TRIM13	TRIM13	>tr|X6R9U5|X6R9U5_HUMAN E3 ubiquitin-protein ligase TRIM13 (Fragment) OS=Homo sapiens GN=TRIM13 PE=4 SV=1;>sp|O60858|TRI13_HUMAN E3 ubiquitin-protein ligase TRIM13 OS=Homo sapiens GN=TRIM13 PE=1 SV=2;>tr|A0A024RDU3|A0A024RDU3_HUMAN Ret finger protein 2, is	0.77334	3	NaN	0.75816	NaN	NaN		1.31898	+	NaN		1	1.31898
Q96T23-2;Q96T23;Q96T23-3;H0YER1;H0YCN2;Q05DG0;H7C306;H0YDG9;H0YEX0	Remodeling and spacing factor 1	RSF1	>sp|Q96T23-2|RSF1_HUMAN Isoform 2 of Remodeling and spacing factor 1 OS=Homo sapiens GN=RSF1;>sp|Q96T23|RSF1_HUMAN Remodeling and spacing factor 1 OS=Homo sapiens GN=RSF1 PE=1 SV=2;>sp|Q96T23-3|RSF1_HUMAN Isoform 3 of Remodeling and spacing factor 1 OS=Hom	0.7747	19	0.76988	0.72663	0.8205	1.2989		1.37622	+	1.21877		1	1.2989
E9PLR7;F8WDV7;H0YEH6;A0PJP0;Q9H920	RING finger protein 121	RNF121	>tr|E9PLR7|E9PLR7_HUMAN RING finger protein 121 OS=Homo sapiens GN=RNF121 PE=1 SV=1;>tr|F8WDV7|F8WDV7_HUMAN RING finger protein 121 OS=Homo sapiens GN=RNF121 PE=1 SV=1;>tr|H0YEH6|H0YEH6_HUMAN RING finger protein 121 (Fragment) OS=Homo sapiens GN=RNF121 PE=	0.7777	6	NaN	0.90358	0.72859	NaN		1.10671		1.37251	+	1	1.23961
B4DFP1;P36871;P36871-2;B7Z6C2;P36871-3;B4DDQ8;Q9H1D2	Phosphoglucomutase-1	PGM1	>tr|B4DFP1|B4DFP1_HUMAN cDNA FLJ51818, highly similar to Phosphoglucomutase-1 (EC 5.4.2.2) OS=Homo sapiens PE=2 SV=1;>sp|P36871|PGM1_HUMAN Phosphoglucomutase-1 OS=Homo sapiens GN=PGM1 PE=1 SV=3;>sp|P36871-2|PGM1_HUMAN Isoform 2 of Phosphoglucomutase-1 OS=H	0.77839	20	0.74887	0.76678	0.82684	1.33535		1.30416	+	1.20942		1	1.30416
A0A024R2U2;B4DM24;E7ETR1;B4DIG8;B4DMF2;Q8NCB2-3;A0A024R331;Q8NCB2-2;Q8NCB2;B2RDF9;C9J9E2	CaM kinase-like vesicle-associated protein	CAMKV	>tr|A0A024R2U2|A0A024R2U2_HUMAN CaM kinase-like vesicle-associated, isoform CRA_d OS=Homo sapiens GN=CAMKV PE=4 SV=1;>tr|B4DM24|B4DM24_HUMAN CaM kinase-like vesicle-associated protein OS=Homo sapiens GN=CAMKV PE=2 SV=1;>tr|E7ETR1|E7ETR1_HUMAN CaM kinase-li	0.77947	6	NaN	0.82279	0.70828	NaN		1.21538		1.41187	+	1	1.31362
P79522-2;B3KQA4;Q96QB9;P79522;A6NDA2	Proline-rich protein 3	PRR3;CAT56	>sp|P79522-2|PRR3_HUMAN Isoform 2 of Proline-rich protein 3 OS=Homo sapiens GN=PRR3;>tr|B3KQA4|B3KQA4_HUMAN cDNA FLJ90050 fis, clone HEMBA1002524, highly similar to Proline-rich protein 3 OS=Homo sapiens PE=2 SV=1;>tr|Q96QB9|Q96QB9_HUMAN CAT56 protein OS=H	0.78106	9	0.77013	0.75403	0.80343	1.29848		1.32621	+	1.24466		1	1.29848
Q99504-5;Q99504-3;Q99504;Q0P685;Q99504-2;Q99504-4;B1APR7;B4E151	Eyes absent homolog 3	EYA3	>sp|Q99504-5|EYA3_HUMAN Isoform 5 of Eyes absent homolog 3 OS=Homo sapiens GN=EYA3;>sp|Q99504-3|EYA3_HUMAN Isoform 3 of Eyes absent homolog 3 OS=Homo sapiens GN=EYA3;>sp|Q99504|EYA3_HUMAN Eyes absent homolog 3 OS=Homo sapiens GN=EYA3 PE=1 SV=3;>tr|Q0P685|Q	0.78176	9	0.72197	0.94478	0.83703	1.3851	+	1.05845		1.1947		1	1.1947
Q96EK6;A0A024R649;G3V4W4;G3V5E4	Glucosamine 6-phosphate N-acetyltransferase	GNPNAT1	>sp|Q96EK6|GNA1_HUMAN Glucosamine 6-phosphate N-acetyltransferase OS=Homo sapiens GN=GNPNAT1 PE=1 SV=1;>tr|A0A024R649|A0A024R649_HUMAN Glucosamine-phosphate N-acetyltransferase 1, isoform CRA_a OS=Homo sapiens GN=GNPNAT1 PE=4 SV=1;>tr|G3V4W4|G3V4W4_HUMAN G	0.7822	11	0.61634	0.7822	0.87165	1.62248	+	1.27845		1.14725		1	1.27845
Q58FF8	Putative heat shock protein HSP 90-beta 2	HSP90AB2P	>sp|Q58FF8|H90B2_HUMAN Putative heat shock protein HSP 90-beta 2 OS=Homo sapiens GN=HSP90AB2P PE=1 SV=2	0.78246	91	1.056	0.76243	1.0865	0.94697		1.3116	+	0.920387		1	0.94697
Q53RT9;O43150-2;O43150	Arf-GAP with SH3 domain, ANK repeat and PH domain-containing protein 2	DDEF2;ASAP2	>tr|Q53RT9|Q53RT9_HUMAN Putative uncharacterized protein DDEF2 (Fragment) OS=Homo sapiens GN=DDEF2 PE=4 SV=1;>sp|O43150-2|ASAP2_HUMAN Isoform 2 of Arf-GAP with SH3 domain, ANK repeat and PH domain-containing protein 2 OS=Homo sapiens GN=ASAP2;>sp|O43150|AS	0.78344	4	NaN	NaN	0.70846	NaN		NaN		1.41151	+	1	1.41151
Q9BW71;B2R6A9;Q9BW71-3;Q9BW71-2	HIRA-interacting protein 3	HIRIP3	>sp|Q9BW71|HIRP3_HUMAN HIRA-interacting protein 3 OS=Homo sapiens GN=HIRIP3 PE=1 SV=3;>tr|B2R6A9|B2R6A9_HUMAN cDNA, FLJ92868, highly similar to Homo sapiens HIRA interacting protein 3 (HIRIP3), mRNA OS=Homo sapiens PE=2 SV=1;>sp|Q9BW71-3|HIRP3_HUMAN Isofor	0.78489	4	0.53244	NaN	NaN	1.87815	+	NaN		NaN		1	1.87815
H7C0U0;F8WCQ4;C9JNP8;Q9H300-2;Q9H300	Presenilins-associated rhomboid-like protein, mitochondrial;P-beta	PARL	>tr|H7C0U0|H7C0U0_HUMAN P-beta (Fragment) OS=Homo sapiens GN=PARL PE=4 SV=1;>tr|F8WCQ4|F8WCQ4_HUMAN P-beta OS=Homo sapiens GN=PARL PE=4 SV=1;>tr|C9JNP8|C9JNP8_HUMAN P-beta OS=Homo sapiens GN=PARL PE=4 SV=1;>sp|Q9H300-2|PARL_HUMAN Isoform 2 of Presenilins-a	0.78548	3	0.69504	NaN	NaN	1.43877	+	NaN		NaN		1	1.43877
Q0VD96;K7EIX2;Q6AI08;K7ELR8	HEAT repeat-containing protein 6	HEATR6	>tr|Q0VD96|Q0VD96_HUMAN HEATR6 protein OS=Homo sapiens GN=HEATR6 PE=2 SV=1;>tr|K7EIX2|K7EIX2_HUMAN HEAT repeat-containing protein 6 OS=Homo sapiens GN=HEATR6 PE=1 SV=1;>sp|Q6AI08|HEAT6_HUMAN HEAT repeat-containing protein 6 OS=Homo sapiens GN=HEATR6 PE=1 S	0.78584	5	0.68557	0.78584	NaN	1.45864	+	1.27252		NaN		1	1.36558
K7ESP4;Q8WVC6	Dephospho-CoA kinase domain-containing protein	DCAKD	>tr|K7ESP4|K7ESP4_HUMAN Dephospho-CoA kinase domain-containing protein (Fragment) OS=Homo sapiens GN=DCAKD PE=1 SV=1;>sp|Q8WVC6|DCAKD_HUMAN Dephospho-CoA kinase domain-containing protein OS=Homo sapiens GN=DCAKD PE=1 SV=1	0.78614	4	0.72327	NaN	0.78614	1.38261	+	NaN		1.27204		1	1.32732
Q96KG3;Q99996-5;Q99996-3;Q99996-2;Q99996;Q99996-6;Q5GIA7;H7BYL6	A-kinase anchor protein 9	AKAP9	>tr|Q96KG3|Q96KG3_HUMAN AKAP350C OS=Homo sapiens PE=2 SV=3;>sp|Q99996-5|AKAP9_HUMAN Isoform 5 of A-kinase anchor protein 9 OS=Homo sapiens GN=AKAP9;>sp|Q99996-3|AKAP9_HUMAN Isoform 3 of A-kinase anchor protein 9 OS=Homo sapiens GN=AKAP9;>sp|Q99996-2|AKAP9_	0.78761	3	0.4726	NaN	NaN	2.11595	+	NaN		NaN		1	2.11595
Q14739;A0A024R3R5;C9JXK0;C9JES9;B4E0Z3;H7C442;H7C108	Lamin-B receptor	LBR	>sp|Q14739|LBR_HUMAN Lamin-B receptor OS=Homo sapiens GN=LBR PE=1 SV=2;>tr|A0A024R3R5|A0A024R3R5_HUMAN Lamin B receptor, isoform CRA_a OS=Homo sapiens GN=LBR PE=4 SV=1;>tr|C9JXK0|C9JXK0_HUMAN Lamin-B receptor (Fragment) OS=Homo sapiens GN=LBR PE=1 SV=1	0.78829	14	0.833	0.83336	0.7317	1.20048		1.19996		1.36668	+	1	1.20048
E9PG22;B4DGU8;Q8IW35;Q8IW35-2	Centrosomal protein of 97 kDa	CEP97	>tr|E9PG22|E9PG22_HUMAN Centrosomal protein of 97 kDa OS=Homo sapiens GN=CEP97 PE=1 SV=1;>tr|B4DGU8|B4DGU8_HUMAN cDNA FLJ60110, highly similar to Homo sapiens leucine-rich repeats and IQ motif containing 2 (LRRIQ2), mRNA OS=Homo sapiens PE=2 SV=1;>sp|Q8IW3	0.78858	5	0.78858	0.71597	NaN	1.2681		1.39671	+	NaN		1	1.3324
Q9Y6N7-6;Q9Y6N7-5;Q1RMC8;Q2M1J3;Q9Y6N7-4;Q9Y6N7-3;Q9Y6N7;Q9Y6N7-2;B7Z687;H7C4Y7	Roundabout homolog 1	ROBO1	>sp|Q9Y6N7-6|ROBO1_HUMAN Isoform 6 of Roundabout homolog 1 OS=Homo sapiens GN=ROBO1;>sp|Q9Y6N7-5|ROBO1_HUMAN Isoform 5 of Roundabout homolog 1 OS=Homo sapiens GN=ROBO1;>tr|Q1RMC8|Q1RMC8_HUMAN ROBO1 protein OS=Homo sapiens GN=ROBO1 PE=2 SV=1;>tr|Q2M1J3|Q2M1	0.78937	7	0.53133	0.87372	NaN	1.88207	+	1.14453		NaN		1	1.5133
Q96SZ6-2;B4DI01;Q96SZ6-6;Q53H36;Q96SZ6-3;Q96SZ6;H0Y721;Q96SZ6-5;Q96SZ6-4	CDK5 regulatory subunit-associated protein 1	CDK5RAP1	>sp|Q96SZ6-2|CK5P1_HUMAN Isoform 2 of CDK5 regulatory subunit-associated protein 1 OS=Homo sapiens GN=CDK5RAP1;>tr|B4DI01|B4DI01_HUMAN cDNA FLJ53994, highly similar to CDK5 regulatory subunit-associated protein 1 OS=Homo sapiens PE=2 SV=1;>sp|Q96SZ6-6|CK5P	0.78973	4	NaN	0.75133	0.83964	NaN		1.33097	+	1.19099		1	1.26098
Q9NNW5;C9K020;B4DK45;E9PBK6;B4DLP3;E9PDU5;B4E256;E5RFX3;V9GYZ2;F8WE36;Q9NW86;B3KRR8;Q6AZD6;Q9H9M3;Q8NDH0	WD repeat-containing protein 6	WDR6	>sp|Q9NNW5|WDR6_HUMAN WD repeat-containing protein 6 OS=Homo sapiens GN=WDR6 PE=1 SV=1;>tr|C9K020|C9K020_HUMAN WD repeat-containing protein 6 (Fragment) OS=Homo sapiens GN=WDR6 PE=1 SV=1;>tr|B4DK45|B4DK45_HUMAN cDNA FLJ52552, highly similar to WD repeat pr	0.79036	5	0.90259	0.61395	NaN	1.10792		1.6288	+	NaN		1	1.36836
O95169-3;O95169;K9J7I2;E9PQ68;O95169-2;E9PIZ8	NADH dehydrogenase [ubiquinone] 1 beta subcomplex subunit 8, mitochondrial	NDUFB8	>sp|O95169-3|NDUB8_HUMAN Isoform 3 of NADH dehydrogenase [ubiquinone] 1 beta subcomplex subunit 8, mitochondrial OS=Homo sapiens GN=NDUFB8;>sp|O95169|NDUB8_HUMAN NADH dehydrogenase [ubiquinone] 1 beta subcomplex subunit 8, mitochondrial OS=Homo sapiens GN=	0.79064	14	0.6902	0.82173	0.79149	1.44886	+	1.21694		1.26344		1	1.26344
Q58F09;Q13724-2;Q13724;A8K9K4;C9J8D4;C9JDQ1	Mannosyl-oligosaccharide glucosidase	GCS1;MOGS	>tr|Q58F09|Q58F09_HUMAN Glucosidase I OS=Homo sapiens GN=GCS1 PE=2 SV=1;>sp|Q13724-2|MOGS_HUMAN Isoform 2 of Mannosyl-oligosaccharide glucosidase OS=Homo sapiens GN=MOGS;>sp|Q13724|MOGS_HUMAN Mannosyl-oligosaccharide glucosidase OS=Homo sapiens GN=MOGS PE=	0.79113	23	0.86591	0.72529	0.78917	1.15485		1.37876	+	1.26715		1	1.26715
Q01831-2;X5DRB1;Q01831;D9I4E1;A8K146;A0A024R2M8;D2CPI9;D2CPJ0;D2CPJ8;Q01831-3;D2CPK1;E7EUB5;D2CPK7;D2CPJ3;D2CPK0;D2CPJ1	DNA repair protein complementing XP-C cells	XPC	>sp|Q01831-2|XPC_HUMAN Isoform 2 of DNA repair protein complementing XP-C cells OS=Homo sapiens GN=XPC;>tr|X5DRB1|X5DRB1_HUMAN Xeroderma pigmentosum, complementation group C isoform A (Fragment) OS=Homo sapiens GN=XPC PE=2 SV=1;>sp|Q01831|XPC_HUMAN DNA rep	0.79271	3	0.72692	NaN	NaN	1.37567	+	NaN		NaN		1	1.37567
Q9P2K5;H0YKS1;Q9P2K5-4	Myelin expression factor 2	MYEF2	>sp|Q9P2K5|MYEF2_HUMAN Myelin expression factor 2 OS=Homo sapiens GN=MYEF2 PE=1 SV=3	0.79296	16	0.75026	0.76116	0.8201	1.33287		1.31378	+	1.21936		1	1.31378
Q14141;Q6NT82;Q541S4;Q14141-2;Q548C9;Q14141-4;B1AMS2;Q6B514;F5H1J5;B4DZW0;Q8NFH9;B4E049;B4DPT4;Q8NFI2;Q8NFI0;Q14141-3;Q8NFI1;C9JV02	Septin-6	42253	>sp|Q14141|SEPT6_HUMAN Septin-6 OS=Homo sapiens GN=SEPT6 PE=1 SV=4;>tr|Q6NT82|Q6NT82_HUMAN Septin 6 OS=Homo sapiens GN=SEPT6 PE=2 SV=1;>tr|Q541S4|Q541S4_HUMAN Septin 6 OS=Homo sapiens GN=SEPT6 PE=2 SV=1;>sp|Q14141-2|SEPT6_HUMAN Isoform I of Septin-6 OS=Hom	0.79482	10	0.78204	0.55156	0.78661	1.27871		1.81304	+	1.27128		1	1.27871
Q9BZZ5-2;Q9BZZ5-3;G3V1C3;Q9BZZ5;B4E283;Q9BZZ5-5;B4DDR3;Q9BZZ5-1;H0YER7;E9PQK6	Apoptosis inhibitor 5	API5	>sp|Q9BZZ5-2|API5_HUMAN Isoform 2 of Apoptosis inhibitor 5 OS=Homo sapiens GN=API5;>sp|Q9BZZ5-3|API5_HUMAN Isoform 3 of Apoptosis inhibitor 5 OS=Homo sapiens GN=API5;>tr|G3V1C3|G3V1C3_HUMAN Apoptosis inhibitor 5 OS=Homo sapiens GN=API5 PE=1 SV=1;>sp|Q9BZZ5	0.79512	24	0.83969	0.68034	0.79306	1.19092		1.46985	+	1.26094		1	1.26094
Q5VV87;Q53GB9;O14880;A0A024R8Z1;Q5VV89	Microsomal glutathione S-transferase 3	MGST3	>tr|Q5VV87|Q5VV87_HUMAN Microsomal glutathione S-transferase 3 OS=Homo sapiens GN=MGST3 PE=1 SV=1;>tr|Q53GB9|Q53GB9_HUMAN Microsomal glutathione S-transferase 3 variant (Fragment) OS=Homo sapiens PE=2 SV=1;>sp|O14880|MGST3_HUMAN Microsomal glutathione S-tr	0.79551	4	NaN	0.76459	NaN	NaN		1.30789	+	NaN		1	1.30789
B7Z5N6;Q5T1V6-2;Q5T1V6;Q5T1V5	Probable ATP-dependent RNA helicase DDX59	DDX59	>tr|B7Z5N6|B7Z5N6_HUMAN cDNA FLJ56549, highly similar to Homo sapiens DEAD (Asp-Glu-Ala-Asp) box polypeptide 59 (DDX59), transcript variant 2, mRNA OS=Homo sapiens PE=2 SV=1;>sp|Q5T1V6-2|DDX59_HUMAN Isoform 2 of Probable ATP-dependent RNA helicase DDX59 OS	0.79683	5	0.69877	0.91664	NaN	1.43109	+	1.09094		NaN		1	1.26101
Q14674-2;Q14674	Separin	ESPL1	>sp|Q14674-2|ESPL1_HUMAN Isoform 2 of Separin OS=Homo sapiens GN=ESPL1;>sp|Q14674|ESPL1_HUMAN Separin OS=Homo sapiens GN=ESPL1 PE=1 SV=3	0.79753	3	1.9215	NaN	NaN	0.520427	+	NaN		NaN		1	0.520427
Q9P287;B4E318;B4DUS0;Q9P287-4;Q9P287-3;Q9P287-2	BRCA2 and CDKN1A-interacting protein	BCCIP	>sp|Q9P287|BCCIP_HUMAN BRCA2 and CDKN1A-interacting protein OS=Homo sapiens GN=BCCIP PE=1 SV=1;>tr|B4E318|B4E318_HUMAN BRCA2 and CDKN1A-interacting protein OS=Homo sapiens GN=BCCIP PE=1 SV=1;>tr|B4DUS0|B4DUS0_HUMAN BRCA2 and CDKN1A-interacting protein OS=H	0.79864	32	0.79463	0.7694	0.81599	1.25845		1.29971	+	1.22551		1	1.25845
V9HWG1;Q13228;Q13228-4;H0Y532;Q13228-2;Q13228-3;F2Z2W8;F8WCR4;Q9H8A8;A6PVX1;B4DPI7;C9JVL0	Selenium-binding protein 1	SELENBP1	>tr|V9HWG1|V9HWG1_HUMAN Epididymis secretory sperm binding protein Li 134P OS=Homo sapiens GN=HEL-S-134P PE=2 SV=1;>sp|Q13228|SBP1_HUMAN Selenium-binding protein 1 OS=Homo sapiens GN=SELENBP1 PE=1 SV=2;>sp|Q13228-4|SBP1_HUMAN Isoform 4 of Selenium-binding	0.80175	8	0.83229	0.70767	0.77491	1.2015		1.41309	+	1.29047		1	1.29047
Q15154-2;Q15154;D3DSQ0;A2RUU9;E7EV56;E7ETA6;B9EIS5;H0YBA1;A6NNN6;B4DJ00;B4DWY1;E5RGQ4;Q15154-3;E9PGW9;E7EV93	Pericentriolar material 1 protein	PCM1	>sp|Q15154-2|PCM1_HUMAN Isoform 2 of Pericentriolar material 1 protein OS=Homo sapiens GN=PCM1;>sp|Q15154|PCM1_HUMAN Pericentriolar material 1 protein OS=Homo sapiens GN=PCM1 PE=1 SV=4;>tr|D3DSQ0|D3DSQ0_HUMAN Pericentriolar material 1, isoform CRA_a OS=Hom	0.80424	6	0.98663	0.63938	0.84067	1.01355		1.56402	+	1.18953		1	1.18953
Q6FI97;Q53FS0;O96019;O96019-2;H7C5S0;C9JQT2;D3DNS0	Actin-like protein 6A	BAF53A;ACTL6A	>tr|Q6FI97|Q6FI97_HUMAN BAF53A protein OS=Homo sapiens GN=BAF53A PE=2 SV=1;>tr|Q53FS0|Q53FS0_HUMAN Actin-like 6A isoform 1 variant (Fragment) OS=Homo sapiens PE=2 SV=1;>sp|O96019|ACL6A_HUMAN Actin-like protein 6A OS=Homo sapiens GN=ACTL6A PE=1 SV=1;>sp|O96	0.80448	15	0.8286	0.77041	0.73581	1.20685		1.29801		1.35905	+	1	1.29801
F8W733;Q9NXR7-4;Q9NXR7-3;Q9NXR7;Q9NXR7-1;C9J2G0;A2NFR5;Q6ZWH1	BRCA1-A complex subunit BRE	BRE	>tr|F8W733|F8W733_HUMAN BRCA1-A complex subunit BRE (Fragment) OS=Homo sapiens GN=BRE PE=1 SV=1;>sp|Q9NXR7-4|BRE_HUMAN Isoform 4 of BRCA1-A complex subunit BRE OS=Homo sapiens GN=BRE;>sp|Q9NXR7-3|BRE_HUMAN Isoform 3 of BRCA1-A complex subunit BRE OS=Homo s	0.80625	6	NaN	0.61406	0.85712	NaN		1.62851	+	1.1667		1	1.3976
Q59FQ3;Q9HB21-2;Q5RGS4;Q9HB21;B2RBH1;B3KQL5	Pleckstrin homology domain-containing family A member 1	PLEKHA1	>tr|Q59FQ3|Q59FQ3_HUMAN Pleckstrin homology domain containing, family A (Phosphoinositide binding specific) member 1 variant (Fragment) OS=Homo sapiens PE=2 SV=1;>sp|Q9HB21-2|PKHA1_HUMAN Isoform 2 of Pleckstrin homology domain-containing family A member 1	0.80727	4	0.73479	NaN	NaN	1.36093	+	NaN		NaN		1	1.36093
Q9H845;Q9H9W4;Q9BUX5;H0Y8Z9;Q59FN3;B4DGH4;D6RCD8	Acyl-CoA dehydrogenase family member 9, mitochondrial	ACAD9	>sp|Q9H845|ACAD9_HUMAN Acyl-CoA dehydrogenase family member 9, mitochondrial OS=Homo sapiens GN=ACAD9 PE=1 SV=1;>tr|Q9H9W4|Q9H9W4_HUMAN Acyl-Coenzyme A dehydrogenase family, member 9, isoform CRA_b OS=Homo sapiens GN=ACAD9 PE=2 SV=1;>tr|Q9BUX5|Q9BUX5_HUMAN	0.80894	12	0.73539	0.78164	0.846	1.35982	+	1.27936		1.18203		1	1.27936
O95716;B2R8W8;A0A024R7G2;M0R257	Ras-related protein Rab-3D	RAB3D	>sp|O95716|RAB3D_HUMAN Ras-related protein Rab-3D OS=Homo sapiens GN=RAB3D PE=1 SV=1;>tr|B2R8W8|B2R8W8_HUMAN cDNA, FLJ94098, highly similar to Homo sapiens RAB3D, member RAS oncogene family (RAB3D), mRNA OS=Homo sapiens PE=2 SV=1;>tr|A0A024R7G2|A0A024R7G2_	0.81039	3	NaN	2.0417	NaN	NaN		0.489788	+	NaN		1	0.489788
V5J3L2;Q13586;G0XQ39;Q13586-2;E9PNJ4;E9PIQ8;E9PRE4;E9PR07;E9PJ19;E9PMB4;E9PRZ7;E9PR09;E9PN27;H0YDB2	Stromal interaction molecule 1	STIM1	>tr|V5J3L2|V5J3L2_HUMAN STIM1 OS=Homo sapiens GN=STIM1 PE=2 SV=1;>sp|Q13586|STIM1_HUMAN Stromal interaction molecule 1 OS=Homo sapiens GN=STIM1 PE=1 SV=3;>tr|G0XQ39|G0XQ39_HUMAN STIM1L OS=Homo sapiens GN=STIM1 PE=2 SV=1;>sp|Q13586-2|STIM1_HUMAN Isoform 2 o	0.81101	4	0.69884	NaN	0.95258	1.43094	+	NaN		1.04978		1	1.24036
Q8NFQ8;A0A024R957	Torsin-1A-interacting protein 2	TOR1AIP2	>sp|Q8NFQ8|TOIP2_HUMAN Torsin-1A-interacting protein 2 OS=Homo sapiens GN=TOR1AIP2 PE=1 SV=1;>tr|A0A024R957|A0A024R957_HUMAN Torsin A interacting protein 2, isoform CRA_b OS=Homo sapiens GN=TOR1AIP2 PE=4 SV=1	0.81208	13	0.81208	0.82313	0.3936	1.23141		1.21487		2.54065	+	1	1.23141
Q59EZ3;P11717;Q13661;Q13660;S4R328	Cation-independent mannose-6-phosphate receptor	IGF2R	>tr|Q59EZ3|Q59EZ3_HUMAN Insulin-like growth factor 2 receptor variant (Fragment) OS=Homo sapiens PE=2 SV=1;>sp|P11717|MPRI_HUMAN Cation-independent mannose-6-phosphate receptor OS=Homo sapiens GN=IGF2R PE=1 SV=3	0.81261	17	0.81261	0.72439	1.0384	1.2306		1.38047	+	0.96302		1	1.2306
Q9ULU4-8;Q9ULU4-12;Q9ULU4-22;Q9ULU4-9;Q9ULU4;Q9ULU4-13;Q9ULU4-10;Q9ULU4-11;Q9ULU4-7;Q9ULU4-19;Q9ULU4-3;Q9ULU4-6;Q9ULU4-17;Q9ULU4-15;H7C4X9;Q9ULU4-23;Q9ULU4-21;Q9ULU4-18;Q9ULU4-14;Q9ULU4-16;Q9ULU4-5;Q9ULU4-20;Q569J9;Q2HXV5;Q9ULU4-2;Q9ULU4-4;A6H8Y8;Q5JV90	Protein kinase C-binding protein 1	ZMYND8	>sp|Q9ULU4-8|PKCB1_HUMAN Isoform 8 of Protein kinase C-binding protein 1 OS=Homo sapiens GN=ZMYND8;>sp|Q9ULU4-12|PKCB1_HUMAN Isoform 12 of Protein kinase C-binding protein 1 OS=Homo sapiens GN=ZMYND8;>sp|Q9ULU4-22|PKCB1_HUMAN Isoform 22 of Protein kinase C	0.81512	3	1.4957	NaN	NaN	0.668583	+	NaN		NaN		1	0.668583
Q8TDJ6-2;Q8TDJ6;A0A024R5V2;Q8TDJ6-3;H0YLM8;Q8WTV7	DmX-like protein 2	DMXL2	>sp|Q8TDJ6-2|DMXL2_HUMAN Isoform 2 of DmX-like protein 2 OS=Homo sapiens GN=DMXL2;>sp|Q8TDJ6|DMXL2_HUMAN DmX-like protein 2 OS=Homo sapiens GN=DMXL2 PE=1 SV=2;>tr|A0A024R5V2|A0A024R5V2_HUMAN Dmx-like 2, isoform CRA_c OS=Homo sapiens GN=DMXL2 PE=4 SV=1;>sp|	0.81602	3	5.6851	NaN	NaN	0.175898	+	NaN		NaN		1	0.175898
P05165-2;B2RDE0;P05165;P05165-3;Q5JVH2;H0Y5U0	Propionyl-CoA carboxylase alpha chain, mitochondrial	PCCA	>sp|P05165-2|PCCA_HUMAN Isoform 2 of Propionyl-CoA carboxylase alpha chain, mitochondrial OS=Homo sapiens GN=PCCA;>tr|B2RDE0|B2RDE0_HUMAN cDNA, FLJ96567, highly similar to Homo sapiens propionyl Coenzyme A carboxylase, alpha polypeptide(PCCA), mRNA OS=Homo	0.81652	5	0.94428	NaN	0.7459	1.05901		NaN		1.34066	+	1	1.19984
O75746-2;O75746;B3KMV8	Calcium-binding mitochondrial carrier protein Aralar1	SLC25A12	>sp|O75746-2|CMC1_HUMAN Isoform 2 of Calcium-binding mitochondrial carrier protein Aralar1 OS=Homo sapiens GN=SLC25A12;>sp|O75746|CMC1_HUMAN Calcium-binding mitochondrial carrier protein Aralar1 OS=Homo sapiens GN=SLC25A12 PE=1 SV=2;>tr|B3KMV8|B3KMV8_HUMAN	0.81769	5	0.69572	0.77661	0.79154	1.43736	+	1.28765		1.26336		1	1.28765
V9HWG4;Q9Y2I7;Q9Y2I7-2;Q9Y2I7-3;Q9Y2I7-4;E9PDH4;F8WEZ0;C9JL08	1-phosphatidylinositol 3-phosphate 5-kinase	PIKFYVE	>tr|V9HWG4|V9HWG4_HUMAN Epididymis luminal protein 37 OS=Homo sapiens GN=HEL37 PE=2 SV=1;>sp|Q9Y2I7|FYV1_HUMAN 1-phosphatidylinositol 3-phosphate 5-kinase OS=Homo sapiens GN=PIKFYVE PE=1 SV=3;>sp|Q9Y2I7-2|FYV1_HUMAN Isoform 2 of 1-phosphatidylinositol 3-ph	0.81859	5	0.73729	0.92486	NaN	1.35632	+	1.08124		NaN		1	1.21878
Q96ST3;B3KQE3;H3BNZ3;H3BP90	Paired amphipathic helix protein Sin3a	SIN3A	>sp|Q96ST3|SIN3A_HUMAN Paired amphipathic helix protein Sin3a OS=Homo sapiens GN=SIN3A PE=1 SV=2	0.81888	8	0.82631	0.76941	0.81888	1.2102		1.2997	+	1.22118		1	1.22118
Q8NBF2;Q8NBF2-2;Q7Z658	NHL repeat-containing protein 2	NHLRC2	>sp|Q8NBF2|NHLC2_HUMAN NHL repeat-containing protein 2 OS=Homo sapiens GN=NHLRC2 PE=1 SV=1;>sp|Q8NBF2-2|NHLC2_HUMAN Isoform 2 of NHL repeat-containing protein 2 OS=Homo sapiens GN=NHLRC2	0.81917	10	0.71663	0.81917	0.93148	1.39542	+	1.22075		1.07356		1	1.22075
Q96CP2;I3L1Y9;I3L0R3;I3L231;I3L4I0;Q4VC44-2;Q4VC44;Q4VC44-3	FLYWCH family member 2	FLYWCH2	>sp|Q96CP2|FWCH2_HUMAN FLYWCH family member 2 OS=Homo sapiens GN=FLYWCH2 PE=1 SV=1;>tr|I3L1Y9|I3L1Y9_HUMAN FLYWCH family member 2 OS=Homo sapiens GN=FLYWCH2 PE=1 SV=1	0.81949	7	1.0392	0.86414	0.67083	0.962279		1.15722		1.49069	+	1	1.15722
Q96SB8;Q96SB8-2;C9JMN1	Structural maintenance of chromosomes protein 6	SMC6	>sp|Q96SB8|SMC6_HUMAN Structural maintenance of chromosomes protein 6 OS=Homo sapiens GN=SMC6 PE=1 SV=2;>sp|Q96SB8-2|SMC6_HUMAN Isoform 2 of Structural maintenance of chromosomes protein 6 OS=Homo sapiens GN=SMC6;>tr|C9JMN1|C9JMN1_HUMAN Structural maintena	0.8205	5	0.74414	NaN	NaN	1.34383	+	NaN		NaN		1	1.34383
B7ZAX5;B4DW43;Q01415-2;Q01415;H0YLL3;H0YLL8;H0YNR7;H0YK30;H0YND3;H0YK10	N-acetylgalactosamine kinase	GALK2	>tr|B7ZAX5|B7ZAX5_HUMAN N-acetylgalactosamine kinase OS=Homo sapiens GN=GALK2 PE=1 SV=1;>tr|B4DW43|B4DW43_HUMAN cDNA FLJ56162, highly similar to N-acetylgalactosamine kinase (EC 2.7.1.157) OS=Homo sapiens PE=2 SV=1;>sp|Q01415-2|GALK2_HUMAN Isoform 2 of N-a	0.82161	3	0.82764	0.56819	NaN	1.20825		1.75997	+	NaN		1	1.48411
Q15637-6;A0A024R566;Q15637-4;A0A024R588;Q15637-3;B4DJU4;Q15637-2;A0A024R5D9;Q15637;A0A024R572;B4DSE4;Q14820;F8WEV5;B4DX42;H7C0N4;H7C561	Splicing factor 1	SF1	>sp|Q15637-6|SF01_HUMAN Isoform 6 of Splicing factor 1 OS=Homo sapiens GN=SF1;>tr|A0A024R566|A0A024R566_HUMAN Splicing factor 1, isoform CRA_a OS=Homo sapiens GN=SF1 PE=4 SV=1;>sp|Q15637-4|SF01_HUMAN Isoform 4 of Splicing factor 1 OS=Homo sapiens GN=SF1;>t	0.82302	15	0.90636	0.82162	0.74741	1.10331		1.21711		1.33795	+	1	1.21711
O95155-2;O95155;O95155-4;B4E2Y2;O95155-3;B1AQ61	Ubiquitin conjugation factor E4 B	UBE4B	>sp|O95155-2|UBE4B_HUMAN Isoform 2 of Ubiquitin conjugation factor E4 B OS=Homo sapiens GN=UBE4B;>sp|O95155|UBE4B_HUMAN Ubiquitin conjugation factor E4 B OS=Homo sapiens GN=UBE4B PE=1 SV=1;>sp|O95155-4|UBE4B_HUMAN Isoform 4 of Ubiquitin conjugation factor	0.82484	3	0.88922	0.68506	0.90123	1.12458		1.45973	+	1.10959		1	1.12458
E7ER97;B4DN81;O95671-3;O95671-2;B4DRF1;O95671;B3KM43	N-acetylserotonin O-methyltransferase-like protein	ASMTL	>tr|E7ER97|E7ER97_HUMAN N-acetylserotonin O-methyltransferase-like protein OS=Homo sapiens GN=ASMTL PE=1 SV=1;>tr|B4DN81|B4DN81_HUMAN cDNA FLJ59356, highly similar to N-acetylserotonin O-methyltransferase-like protein OS=Homo sapiens PE=2 SV=1;>sp|O95671-3	0.82494	5	NaN	0.88	0.51493	NaN		1.13636		1.94201	+	1	1.53919
D6REM4;E7ETM0;B4DER9;B4E1D9;P48729-3;P48729;V9HW00;P48729-2;U3KPX3;H0Y9X2;U3KQK7;B4DFH4;Q05DL3;Q6PJ06;U3KQ83	Casein kinase I isoform alpha	CSNK1A1	>tr|D6REM4|D6REM4_HUMAN Casein kinase I isoform alpha OS=Homo sapiens GN=CSNK1A1 PE=1 SV=1;>tr|E7ETM0|E7ETM0_HUMAN Casein kinase I isoform alpha OS=Homo sapiens GN=CSNK1A1 PE=1 SV=1;>tr|B4DER9|B4DER9_HUMAN cDNA FLJ55317, highly similar to Homo sapiens case	0.82653	8	0.83321	0.53879	0.90363	1.20018		1.85601	+	1.10665		1	1.20018
Q4VXH1;B4DT60;B2RAW3;Q9UKT8	F-box/WD repeat-containing protein 2	FBXW2	>tr|Q4VXH1|Q4VXH1_HUMAN F-box/WD repeat-containing protein 2 (Fragment) OS=Homo sapiens GN=FBXW2 PE=1 SV=1;>tr|B4DT60|B4DT60_HUMAN cDNA FLJ53609, highly similar to F-box/WD repeat protein 2 OS=Homo sapiens PE=2 SV=1;>tr|B2RAW3|B2RAW3_HUMAN cDNA, FLJ95158,	0.82693	3	NaN	NaN	0.63645	NaN		NaN		1.57122	+	1	1.57122
Q9BV57;Q9BV57-2	1,2-dihydroxy-3-keto-5-methylthiopentene dioxygenase	ADI1	>sp|Q9BV57|MTND_HUMAN 1,2-dihydroxy-3-keto-5-methylthiopentene dioxygenase OS=Homo sapiens GN=ADI1 PE=1 SV=1	0.82697	3	NaN	1.4456	0.83776	NaN		0.691754	+	1.19366		1	0.942707
Q5SWX8-4;Q5SWX8;Q5SWX8-3;A0A024R973;Q5SWX8-2	Protein odr-4 homolog	ODR4	>sp|Q5SWX8-4|ODR4_HUMAN Isoform 4 of Protein odr-4 homolog OS=Homo sapiens GN=ODR4;>sp|Q5SWX8|ODR4_HUMAN Protein odr-4 homolog OS=Homo sapiens GN=ODR4 PE=2 SV=1;>sp|Q5SWX8-3|ODR4_HUMAN Isoform 3 of Protein odr-4 homolog OS=Homo sapiens GN=ODR4;>tr|A0A024R9	0.82703	7	0.73463	0.82667	0.99324	1.36123	+	1.20967		1.00681		1	1.20967
B2RAX6;Q9Y5J1;J3KSR7;J3QLD6;J3QRG0;J3QR85	U3 small nucleolar RNA-associated protein 18 homolog	UTP18	>tr|B2RAX6|B2RAX6_HUMAN cDNA, FLJ95176, Homo sapiens CGI-48 protein (CGI-48), mRNA OS=Homo sapiens PE=2 SV=1;>sp|Q9Y5J1|UTP18_HUMAN U3 small nucleolar RNA-associated protein 18 homolog OS=Homo sapiens GN=UTP18 PE=1 SV=3;>tr|J3KSR7|J3KSR7_HUMAN U3 small nuc	0.82855	5	0.33808	NaN	0.90422	2.95788	+	NaN		1.10593		1	2.0319
B4DPV9;A8MYT4;Q8NEB9;K7ENH3;M0R0U1;K7EIV6;M0R308;K7EKH3;M0R0G8	Phosphatidylinositol 3-kinase catalytic subunit type 3	PIK3C3	>tr|B4DPV9|B4DPV9_HUMAN Phosphatidylinositol 3-kinase OS=Homo sapiens PE=2 SV=1;>tr|A8MYT4|A8MYT4_HUMAN Phosphatidylinositol 3-kinase OS=Homo sapiens GN=PIK3C3 PE=1 SV=2;>sp|Q8NEB9|PK3C3_HUMAN Phosphatidylinositol 3-kinase catalytic subunit type 3 OS=Homo	0.83014	8	0.66326	0.97893	NaN	1.5077	+	1.02152		NaN		1	1.26461
Q5RI15;B3KM21;Q5RI15-2	Cytochrome c oxidase protein 20 homolog	COX20;FAM36A	>sp|Q5RI15|COX20_HUMAN Cytochrome c oxidase protein 20 homolog OS=Homo sapiens GN=COX20 PE=1 SV=2;>tr|B3KM21|B3KM21_HUMAN Family with sequence similarity 36, member A, isoform CRA_a OS=Homo sapiens GN=FAM36A PE=2 SV=1;>sp|Q5RI15-2|COX20_HUMAN Isoform 2 of	0.83115	6	0.88666	1.0075	0.70434	1.12783		0.992556		1.41977	+	1	1.12783
Q5T0Q6;D3DRG7;O14531	Dihydropyrimidinase-related protein 4	DPYSL4	>tr|Q5T0Q6|Q5T0Q6_HUMAN Dihydropyrimidinase-related protein 4 OS=Homo sapiens GN=DPYSL4 PE=4 SV=1;>tr|D3DRG7|D3DRG7_HUMAN Dihydropyrimidinase-like 4, isoform CRA_a OS=Homo sapiens GN=DPYSL4 PE=4 SV=1;>sp|O14531|DPYL4_HUMAN Dihydropyrimidinase-related prote	0.83239	3	NaN	0.94693	1.7124	NaN		1.05604		0.583976	+	1	0.82001
Q9H1E3;Q9H1E3-2;Q6IA16;Q8WYF8;B4DTY3	Nuclear ubiquitous casein and cyclin-dependent kinase substrate 1	NUCKS1	>sp|Q9H1E3|NUCKS_HUMAN Nuclear ubiquitous casein and cyclin-dependent kinase substrate 1 OS=Homo sapiens GN=NUCKS1 PE=1 SV=1;>sp|Q9H1E3-2|NUCKS_HUMAN Isoform 2 of Nuclear ubiquitous casein and cyclin-dependent kinase substrate 1 OS=Homo sapiens GN=NUCKS1	0.83361	13	0.85685	0.80511	0.72682	1.16707		1.24207		1.37586	+	1	1.24207
Q8IXJ6-4;Q8IXJ6;C9JR33;C9J3U7;F8WCF4;C9JZQ0;B5MCS1;E7EWX6;Q8IXJ6-2;A0A024R0G8;Q8IXJ6-3;A7VJH3;F8WF57;F8WDM4;F8WBT6;Q8IXJ6-5	NAD-dependent protein deacetylase sirtuin-2	SIRT2;SIR2	>sp|Q8IXJ6-4|SIR2_HUMAN Isoform 4 of NAD-dependent protein deacetylase sirtuin-2 OS=Homo sapiens GN=SIRT2;>sp|Q8IXJ6|SIR2_HUMAN NAD-dependent protein deacetylase sirtuin-2 OS=Homo sapiens GN=SIRT2 PE=1 SV=2;>tr|C9JR33|C9JR33_HUMAN NAD-dependent protein dea	0.83365	4	0.7915	0.74369	0.91639	1.26342		1.34465	+	1.09124		1	1.26342
F8WF45;B4DQY7;P82094;A0A024R370;P82094-2;Q6PII6	TATA element modulatory factor	TMF1	>tr|F8WF45|F8WF45_HUMAN TATA element modulatory factor OS=Homo sapiens GN=TMF1 PE=1 SV=1;>tr|B4DQY7|B4DQY7_HUMAN cDNA FLJ51280, highly similar to TATA element modulatory factor (Fragment) OS=Homo sapiens PE=2 SV=1;>sp|P82094|TMF1_HUMAN TATA element modulat	0.83514	6	0.90652	1.0174	0.73143	1.10312		0.982898		1.36718	+	1	1.10312
Q16513-5;Q16513-4;Q16513-3;Q16513-2;Q16513	Serine/threonine-protein kinase N2	PKN2	>sp|Q16513-5|PKN2_HUMAN Isoform 5 of Serine/threonine-protein kinase N2 OS=Homo sapiens GN=PKN2;>sp|Q16513-4|PKN2_HUMAN Isoform 4 of Serine/threonine-protein kinase N2 OS=Homo sapiens GN=PKN2;>sp|Q16513-3|PKN2_HUMAN Isoform 3 of Serine/threonine-protein ki	0.83616	8	0.66889	0.85619	1.1382	1.49501	+	1.16797		0.87858		1	1.16797
B4DP22;Q9HB40;Q9HB40-2	Retinoid-inducible serine carboxypeptidase	SCPEP1	>tr|B4DP22|B4DP22_HUMAN cDNA FLJ55993, highly similar to Retinoid-inducible serine carboxypeptidase (EC 3.4.16.-) OS=Homo sapiens PE=2 SV=1;>sp|Q9HB40|RISC_HUMAN Retinoid-inducible serine carboxypeptidase OS=Homo sapiens GN=SCPEP1 PE=1 SV=1	0.83626	4	0.50556	NaN	0.8616	1.978	+	NaN		1.16063		1	1.56932
O60830;V9GYS0;O60830-2;V9GYU0	Mitochondrial import inner membrane translocase subunit Tim17-B	TIMM17B	>sp|O60830|TI17B_HUMAN Mitochondrial import inner membrane translocase subunit Tim17-B OS=Homo sapiens GN=TIMM17B PE=1 SV=1;>tr|V9GYS0|V9GYS0_HUMAN Mitochondrial import inner membrane translocase subunit Tim17-B OS=Homo sapiens GN=TIMM17B PE=1 SV=1;>sp|O60	0.83772	3	NaN	0.66805	NaN	NaN		1.49689	+	NaN		1	1.49689
Q96S66-4;Q96S66-3;Q96S66-2;A0A024R095;Q96S66;A0A024R0G0	Chloride channel CLIC-like protein 1	CLCC1	>sp|Q96S66-4|CLCC1_HUMAN Isoform 4 of Chloride channel CLIC-like protein 1 OS=Homo sapiens GN=CLCC1;>sp|Q96S66-3|CLCC1_HUMAN Isoform 3 of Chloride channel CLIC-like protein 1 OS=Homo sapiens GN=CLCC1;>sp|Q96S66-2|CLCC1_HUMAN Isoform 2 of Chloride channel C	0.83841	10	0.86914	0.82501	0.65341	1.15056		1.21211		1.53043	+	1	1.21211
B4DSK7;Q15648;Q15648-3;B2RAG9	Mediator of RNA polymerase II transcription subunit 1	MED1	>tr|B4DSK7|B4DSK7_HUMAN cDNA FLJ50196, highly similar to Peroxisome proliferator-activated receptor-binding protein (Fragment) OS=Homo sapiens PE=2 SV=1;>sp|Q15648|MED1_HUMAN Mediator of RNA polymerase II transcription subunit 1 OS=Homo sapiens GN=MED1 PE=	0.83875	9	0.70798	0.92994	0.85758	1.41247	+	1.07534		1.16607		1	1.16607
Q96N67-4;Q96N67-3;Q96N67-5;Q96N67-2;Q96N67-6;Q96N67;Q96N67-7;H0Y7L2;A4FU72;B3KRG0	Dedicator of cytokinesis protein 7	DOCK7	>sp|Q96N67-4|DOCK7_HUMAN Isoform 4 of Dedicator of cytokinesis protein 7 OS=Homo sapiens GN=DOCK7;>sp|Q96N67-3|DOCK7_HUMAN Isoform 3 of Dedicator of cytokinesis protein 7 OS=Homo sapiens GN=DOCK7;>sp|Q96N67-5|DOCK7_HUMAN Isoform 5 of Dedicator of cytokines	0.83985	9	0.89821	0.77895	1.6335	1.11333		1.28378		0.612182	+	1	1.11333
Q9Y6A9;C9JBL1;X6R2S6	Signal peptidase complex subunit 1	SPCS1	>sp|Q9Y6A9|SPCS1_HUMAN Signal peptidase complex subunit 1 OS=Homo sapiens GN=SPCS1 PE=1 SV=4;>tr|C9JBL1|C9JBL1_HUMAN Signal peptidase complex subunit 1 OS=Homo sapiens GN=SPCS1 PE=1 SV=1;>tr|X6R2S6|X6R2S6_HUMAN Signal peptidase complex subunit 1 OS=Homo sa	0.84024	8	0.6988	0.94204	0.81204	1.43102	+	1.06153		1.23147		1	1.23147
Q6ZRS2-3;Q6ZRS2-2;Q6ZRS2;Q6P4A2;G1UI29;B3KN63	Helicase SRCAP	SRCAP	>sp|Q6ZRS2-3|SRCAP_HUMAN Isoform 3 of Helicase SRCAP OS=Homo sapiens GN=SRCAP;>sp|Q6ZRS2-2|SRCAP_HUMAN Isoform 2 of Helicase SRCAP OS=Homo sapiens GN=SRCAP;>sp|Q6ZRS2|SRCAP_HUMAN Helicase SRCAP OS=Homo sapiens GN=SRCAP PE=1 SV=3	0.84072	19	0.86499	0.9176	0.7351	1.15608		1.0898		1.36036	+	1	1.15608
Q9H2W6;Q8TER9	39S ribosomal protein L46, mitochondrial	MRPL46	>sp|Q9H2W6|RM46_HUMAN 39S ribosomal protein L46, mitochondrial OS=Homo sapiens GN=MRPL46 PE=1 SV=1	0.84243	10	0.84243	0.97348	0.55066	1.18704		1.02724		1.816	+	1	1.18704
B9ZVN9;O95602;B7ZKR9;B7Z284;B7Z8X7;Q9H6T2;Q96AG9	DNA-directed RNA polymerase;DNA-directed RNA polymerase I subunit RPA1	POLR1A	>tr|B9ZVN9|B9ZVN9_HUMAN DNA-directed RNA polymerase OS=Homo sapiens GN=POLR1A PE=1 SV=1;>sp|O95602|RPA1_HUMAN DNA-directed RNA polymerase I subunit RPA1 OS=Homo sapiens GN=POLR1A PE=1 SV=2;>tr|B7ZKR9|B7ZKR9_HUMAN DNA-directed RNA polymerase OS=Homo sapiens	0.84249	17	0.89546	0.91205	0.72978	1.11674		1.09643		1.37028	+	1	1.11674
Q5JSZ5;H0Y412;Q5JSZ5-5;Q5H9R5	Protein PRRC2B	PRRC2B	>sp|Q5JSZ5|PRC2B_HUMAN Protein PRRC2B OS=Homo sapiens GN=PRRC2B PE=1 SV=2;>tr|H0Y412|H0Y412_HUMAN Protein PRRC2B (Fragment) OS=Homo sapiens GN=PRRC2B PE=1 SV=1;>sp|Q5JSZ5-5|PRC2B_HUMAN Isoform 1 of Protein PRRC2B OS=Homo sapiens GN=PRRC2B	0.84317	4	0.7647	0.94453	0.3652	1.3077		1.05873		2.73823	+	1	1.3077
Q13459-2;Q4LE74;M0R300;Q13459;M0R0P8;B0I1T6;M0QZY4;M0R2J3	Unconventional myosin-IXb	MYO9B;MYO9B variant protein	>sp|Q13459-2|MYO9B_HUMAN Isoform Short of Unconventional myosin-IXb OS=Homo sapiens GN=MYO9B;>tr|Q4LE74|Q4LE74_HUMAN MYO9B variant protein (Fragment) OS=Homo sapiens GN=MYO9B variant protein PE=2 SV=1;>tr|M0R300|M0R300_HUMAN Unconventional myosin-IXb (Frag	0.84682	5	1.076	0.65259	NaN	0.929368		1.53236	+	NaN		1	1.23086
Q8IUH3-2;Q8IUH3-3;Q8IUH3	RNA-binding protein 45	RBM45	>sp|Q8IUH3-2|RBM45_HUMAN Isoform 2 of RNA-binding protein 45 OS=Homo sapiens GN=RBM45;>sp|Q8IUH3-3|RBM45_HUMAN Isoform 3 of RNA-binding protein 45 OS=Homo sapiens GN=RBM45;>sp|Q8IUH3|RBM45_HUMAN RNA-binding protein 45 OS=Homo sapiens GN=RBM45 PE=2 SV=1	0.84686	4	NaN	0.91881	0.39858	NaN		1.08836		2.50891	+	1	1.79864
Q96GM8;B3KSC7;Q96GM8-2	Target of EGR1 protein 1	TOE1	>sp|Q96GM8|TOE1_HUMAN Target of EGR1 protein 1 OS=Homo sapiens GN=TOE1 PE=1 SV=1;>tr|B3KSC7|B3KSC7_HUMAN cDNA FLJ36001 fis, clone TESTI2015213, highly similar to Homo sapiens target of EGR1, member 1 (nuclear) (TOE1), mRNA OS=Homo sapiens PE=2 SV=1;>sp|Q96	0.84736	6	0.67075	0.86276	1.1363	1.49087	+	1.15907		0.880049		1	1.15907
Q05397-2;Q59GN8;Q8IYN9;Q59GM6;H0YBP1;A0A059VC25;Q05397;Q05397-5;J3QT16;Q658W2;E7ESA6;A0A024R9H6;I6L996;E9PEI4;Q8N9D7;H0YB16;B4DH13;H0YBZ1;Q05397-6;B4DWJ1;Q05397-3;E5RHD8;H0YB99;Q05397-4;E5RI03	Focal adhesion kinase 1	PTK2;DKFZp666O0110	>sp|Q05397-2|FAK1_HUMAN Isoform 2 of Focal adhesion kinase 1 OS=Homo sapiens GN=PTK2;>tr|Q59GN8|Q59GN8_HUMAN PTK2 protein tyrosine kinase 2 isoform b variant (Fragment) OS=Homo sapiens PE=2 SV=1;>tr|Q8IYN9|Q8IYN9_HUMAN Focal adhesion kinase 1 OS=Homo sapie	0.84746	8	0.70665	1.0217	NaN	1.41513	+	0.978761		NaN		1	1.19694
Q9NRZ7-2;B4DUA6;Q9NRZ7;Q9NRZ7-3;C9JL26	1-acyl-sn-glycerol-3-phosphate acyltransferase gamma	AGPAT3	>sp|Q9NRZ7-2|PLCC_HUMAN Isoform 2 of 1-acyl-sn-glycerol-3-phosphate acyltransferase gamma OS=Homo sapiens GN=AGPAT3;>tr|B4DUA6|B4DUA6_HUMAN cDNA FLJ61409, highly similar to 1-acyl-sn-glycerol-3-phosphate acyltransferase gamma (EC 2.3.1.51) OS=Homo sapiens	0.84785	3	0.89252	NaN	0.68781	1.12042		NaN		1.45389	+	1	1.28716
F8W895;E9PAV9;Q5T3I0;Q5T3I0-3;A8KAG1	G patch domain-containing protein 4	GPATCH4	>tr|F8W895|F8W895_HUMAN G patch domain-containing protein 4 (Fragment) OS=Homo sapiens GN=GPATCH4 PE=1 SV=1;>tr|E9PAV9|E9PAV9_HUMAN G patch domain-containing protein 4 OS=Homo sapiens GN=GPATCH4 PE=1 SV=1;>sp|Q5T3I0|GPTC4_HUMAN G patch domain-containing pr	0.8479	5	NaN	0.74785	0.87716	NaN		1.33717	+	1.14004		1	1.2386
Q96P16-3;Q96P16;A0A024RC37;K7EP82	Regulation of nuclear pre-mRNA domain-containing protein 1A	RPRD1A	>sp|Q96P16-3|RPR1A_HUMAN Isoform 2 of Regulation of nuclear pre-mRNA domain-containing protein 1A OS=Homo sapiens GN=RPRD1A;>sp|Q96P16|RPR1A_HUMAN Regulation of nuclear pre-mRNA domain-containing protein 1A OS=Homo sapiens GN=RPRD1A PE=1 SV=1;>tr|A0A024RC3	0.84797	5	0.70882	NaN	0.8948	1.4108	+	NaN		1.11757		1	1.26418
Q9C0B1;B3KU60;B4DHN4;Q9C0B1-4;Q9C0B1-3;F8WCB8;Q9C0B1-2	Alpha-ketoglutarate-dependent dioxygenase FTO	FTO	>sp|Q9C0B1|FTO_HUMAN Alpha-ketoglutarate-dependent dioxygenase FTO OS=Homo sapiens GN=FTO PE=1 SV=3;>tr|B3KU60|B3KU60_HUMAN cDNA FLJ39235 fis, clone OCBBF2007829, highly similar to Mus musculus fatso protein OS=Homo sapiens PE=2 SV=1	0.85169	16	0.85501	0.67946	0.95924	1.16958		1.47176	+	1.04249		1	1.16958
Q8IXQ3	Uncharacterized protein C9orf40	C9orf40	>sp|Q8IXQ3|CI040_HUMAN Uncharacterized protein C9orf40 OS=Homo sapiens GN=C9orf40 PE=1 SV=1	0.85336	3	NaN	NaN	0.56497	NaN		NaN		1.77001	+	1	1.77001
P46020-3;A6NIT2;P46020-2;P46020;A6NMN0	Phosphorylase b kinase regulatory subunit alpha, skeletal muscle isoform	PHKA1	>sp|P46020-3|KPB1_HUMAN Isoform 3 of Phosphorylase b kinase regulatory subunit alpha, skeletal muscle isoform OS=Homo sapiens GN=PHKA1;>tr|A6NIT2|A6NIT2_HUMAN Phosphorylase b kinase regulatory subunit alpha, skeletal muscle isoform OS=Homo sapiens GN=PHKA1	0.85337	4	NaN	0.95729	0.73516	NaN		1.04462		1.36025	+	1	1.20243
C9J406;B4DS66;H7C463		IMMT	>tr|C9J406|C9J406_HUMAN Mitochondrial inner membrane protein OS=Homo sapiens GN=IMMT PE=1 SV=1;>tr|B4DS66|B4DS66_HUMAN cDNA FLJ54290, highly similar to Mitochondrial inner membrane protein OS=Homo sapiens PE=2 SV=1;>tr|H7C463|H7C463_HUMAN Mitochondrial inn	0.85421	4	NaN	NaN	0.73753	NaN		NaN		1.35588	+	1	1.35588
Q15057;C9J8L1;H7C3Q8	Arf-GAP with coiled-coil, ANK repeat and PH domain-containing protein 2	ACAP2	>sp|Q15057|ACAP2_HUMAN Arf-GAP with coiled-coil, ANK repeat and PH domain-containing protein 2 OS=Homo sapiens GN=ACAP2 PE=1 SV=3	0.85444	4	0.82083	0.92999	0.63863	1.21828		1.07528		1.56585	+	1	1.21828
Q53H60;O60508;Q59H56;Q5SRN1;B4DHE3;Q2TA76	Pre-mRNA-processing factor 17	CDC40	>tr|Q53H60|Q53H60_HUMAN Pre-mRNA splicing factor 17 variant (Fragment) OS=Homo sapiens PE=2 SV=1;>sp|O60508|PRP17_HUMAN Pre-mRNA-processing factor 17 OS=Homo sapiens GN=CDC40 PE=1 SV=1;>tr|Q59H56|Q59H56_HUMAN Pre-mRNA splicing factor 17 variant (Fragment)	0.85475	4	0.65932	0.85475	NaN	1.51671	+	1.16993		NaN		1	1.34332
Q96RE7;A0A024R7E0;K7ELC5	Nucleus accumbens-associated protein 1	NACC1	>sp|Q96RE7|NACC1_HUMAN Nucleus accumbens-associated protein 1 OS=Homo sapiens GN=NACC1 PE=1 SV=1;>tr|A0A024R7E0|A0A024R7E0_HUMAN BTB (POZ) domain containing 14B, isoform CRA_a OS=Homo sapiens GN=BTBD14B PE=4 SV=1;>tr|K7ELC5|K7ELC5_HUMAN Nucleus accumbens-a	0.85634	4	0.99247	NaN	0.71233	1.00759		NaN		1.40384	+	1	1.20572
P49411;H3BNU3	Elongation factor Tu, mitochondrial	TUFM	>sp|P49411|EFTU_HUMAN Elongation factor Tu, mitochondrial OS=Homo sapiens GN=TUFM PE=1 SV=2	0.85712	91	0.87271	0.96274	0.60108	1.14586		1.0387		1.66367	+	1	1.14586
Q9Y6H1;Q5T1J5	Coiled-coil-helix-coiled-coil-helix domain-containing protein 2, mitochondrial;Putative coiled-coil-helix-coiled-coil-helix domain-containing protein CHCHD2P9, mitochondrial	CHCHD2;CHCHD2P9	>sp|Q9Y6H1|CHCH2_HUMAN Coiled-coil-helix-coiled-coil-helix domain-containing protein 2, mitochondrial OS=Homo sapiens GN=CHCHD2 PE=1 SV=1;>sp|Q5T1J5|CHCH9_HUMAN Putative coiled-coil-helix-coiled-coil-helix domain-containing protein CHCHD2P9, mitochondrial	0.8592	7	0.74357	0.83914	0.8592	1.34486	+	1.1917		1.16387		1	1.1917
Q12769;G3V198;E9PR16;Q12769-3;E9PSI3;Q12769-2	Nuclear pore complex protein Nup160	NUP160	>sp|Q12769|NU160_HUMAN Nuclear pore complex protein Nup160 OS=Homo sapiens GN=NUP160 PE=1 SV=3;>tr|G3V198|G3V198_HUMAN Nuclear pore complex protein Nup160 OS=Homo sapiens GN=NUP160 PE=1 SV=1;>tr|E9PR16|E9PR16_HUMAN Nuclear pore complex protein Nup160 OS=Ho	0.85965	17	0.91394	0.76785	0.84077	1.09416		1.30234	+	1.18939		1	1.18939
Q7Z2Z2-2;Q7Z2Z2;B3KPR5	Elongation factor Tu GTP-binding domain-containing protein 1	EFTUD1	>sp|Q7Z2Z2-2|ETUD1_HUMAN Isoform 2 of Elongation factor Tu GTP-binding domain-containing protein 1 OS=Homo sapiens GN=EFTUD1;>sp|Q7Z2Z2|ETUD1_HUMAN Elongation factor Tu GTP-binding domain-containing protein 1 OS=Homo sapiens GN=EFTUD1 PE=1 SV=2;>tr|B3KPR5|	0.85966	13	0.87966	0.68567	0.85966	1.1368		1.45843	+	1.16325		1	1.16325
I3L412;K7ENA6;P32121;Q59EM5;P32121-3;P32121-4	Beta-arrestin-2	ARRB2	>tr|I3L412|I3L412_HUMAN Beta-arrestin-2 (Fragment) OS=Homo sapiens GN=ARRB2 PE=4 SV=1;>tr|K7ENA6|K7ENA6_HUMAN Beta-arrestin-2 OS=Homo sapiens GN=ARRB2 PE=4 SV=1;>sp|P32121|ARRB2_HUMAN Beta-arrestin-2 OS=Homo sapiens GN=ARRB2 PE=1 SV=2;>tr|Q59EM5|Q59EM5_HUM	0.85998	6	0.77763	0.86233	0.7101	1.28596		1.15965		1.40825	+	1	1.28596
B4DTT0;Q7Z3X3;H7C3P4;B4DYH8;P15586;A8K6V6;A0A024RBC5;F6S8M0;B4E284;F5H4C6;H0YFA9	N-acetylglucosamine-6-sulfatase	DKFZp686E12166;GNS	>tr|B4DTT0|B4DTT0_HUMAN cDNA FLJ51090, highly similar to N-acetylglucosamine-6-sulfatase (EC 3.1.6.14) OS=Homo sapiens PE=2 SV=1;>tr|Q7Z3X3|Q7Z3X3_HUMAN Putative uncharacterized protein DKFZp686E12166 OS=Homo sapiens GN=DKFZp686E12166 PE=2 SV=1;>tr|H7C3P4|	0.86005	7	0.71281	0.86005	0.89016	1.4029	+	1.16272		1.12339		1	1.16272
B4DMI9;Q15398-3;Q15398;A8K732;Q15398-1;G3V543;G3V4E5	Disks large-associated protein 5	DLGAP5	>tr|B4DMI9|B4DMI9_HUMAN cDNA FLJ55894, highly similar to Discs large homolog 7 OS=Homo sapiens PE=2 SV=1;>sp|Q15398-3|DLGP5_HUMAN Isoform 3 of Disks large-associated protein 5 OS=Homo sapiens GN=DLGAP5;>sp|Q15398|DLGP5_HUMAN Disks large-associated protein	0.86071	8	0.63498	0.95732	0.84925	1.57485	+	1.04458		1.17751		1	1.17751
Q8IWS0-4;Q8IWS0-2;Q5JRC6;Q8IWS0-5;Q8IWS0-3;Q8IWS0;B4E138	PHD finger protein 6	PHF6	>sp|Q8IWS0-4|PHF6_HUMAN Isoform 4 of PHD finger protein 6 OS=Homo sapiens GN=PHF6;>sp|Q8IWS0-2|PHF6_HUMAN Isoform 2 of PHD finger protein 6 OS=Homo sapiens GN=PHF6;>tr|Q5JRC6|Q5JRC6_HUMAN PHD finger protein 6 OS=Homo sapiens GN=PHF6 PE=1 SV=1;>sp|Q8IWS0-5|	0.86239	4	0.9143	0.81596	0.68433	1.09373		1.22555		1.46128	+	1	1.22555
O00442;A8K8K1;O00442-2;B4DSL0;A6NIC1	RNA 3-terminal phosphate cyclase	RTCA	>sp|O00442|RTCA_HUMAN RNA 3-terminal phosphate cyclase OS=Homo sapiens GN=RTCA PE=1 SV=1;>tr|A8K8K1|A8K8K1_HUMAN cDNA FLJ76936, highly similar to Homo sapiens RNA terminal phosphate cyclase domain 1 (RTCD1), mRNA OS=Homo sapiens PE=2 SV=1;>sp|O00442-2|RTC	0.86386	10	0.88914	0.88259	0.72005	1.12468		1.13303		1.38879	+	1	1.13303
E7EVX8;Q8WWY3;F1T0A5;E7ESA8;B4DWW8;F1T0A4;E7EU94;E7ESX0;E7EN72;Q8WWY3-2;Q8WWY3-3	U4/U6 small nuclear ribonucleoprotein Prp31	PRPF31	>tr|E7EVX8|E7EVX8_HUMAN U4/U6 small nuclear ribonucleoprotein Prp31 OS=Homo sapiens GN=PRPF31 PE=1 SV=1;>sp|Q8WWY3|PRP31_HUMAN U4/U6 small nuclear ribonucleoprotein Prp31 OS=Homo sapiens GN=PRPF31 PE=1 SV=2;>tr|F1T0A5|F1T0A5_HUMAN PRP31 pre-mRNA processing	0.86536	12	0.8798	0.7887	0.74033	1.13662		1.26791		1.35075	+	1	1.26791
Q68E01-2;Q68E01;Q68E01-3;Q68E01-4	Integrator complex subunit 3	INTS3	>sp|Q68E01-2|INT3_HUMAN Isoform 2 of Integrator complex subunit 3 OS=Homo sapiens GN=INTS3;>sp|Q68E01|INT3_HUMAN Integrator complex subunit 3 OS=Homo sapiens GN=INTS3 PE=1 SV=1;>sp|Q68E01-3|INT3_HUMAN Isoform 3 of Integrator complex subunit 3 OS=Homo sapie	0.86666	4	0.74381	0.84737	NaN	1.34443	+	1.18012		NaN		1	1.26228
Q96HW7;Q96HW7-2;A8K4A1;F8WAA7;Q96HW7-3;E9PIM3;Q2T9F4;Q96LV5	Integrator complex subunit 4	INTS4	>sp|Q96HW7|INT4_HUMAN Integrator complex subunit 4 OS=Homo sapiens GN=INTS4 PE=1 SV=2;>sp|Q96HW7-2|INT4_HUMAN Isoform 2 of Integrator complex subunit 4 OS=Homo sapiens GN=INTS4;>tr|A8K4A1|A8K4A1_HUMAN cDNA FLJ76790 OS=Homo sapiens PE=2 SV=1	0.86879	3	0.86879	0.72777	NaN	1.15103		1.37406	+	NaN		1	1.26254
Q9GZY8-2;Q9GZY8;A0A024R491;C9JU19;E9PQX8;C9JHF5;H7C433;Q9GZY8-4;Q9GZY8-5;Q9GZY8-3	Mitochondrial fission factor	MFF	>sp|Q9GZY8-2|MFF_HUMAN Isoform 2 of Mitochondrial fission factor OS=Homo sapiens GN=MFF;>sp|Q9GZY8|MFF_HUMAN Mitochondrial fission factor OS=Homo sapiens GN=MFF PE=1 SV=1;>tr|A0A024R491|A0A024R491_HUMAN Chromosome 2 open reading frame 33, isoform CRA_a OS=	0.86899	3	NaN	1.4759	0.87843	NaN		0.677553	+	1.13839		1	0.907974
F5GXF5;E7ETD6;Q12830-4;Q12830-2;Q12830;B4DDK2;B4DM40	Nucleosome-remodeling factor subunit BPTF	BPTF	>tr|F5GXF5|F5GXF5_HUMAN Nucleosome-remodeling factor subunit BPTF (Fragment) OS=Homo sapiens GN=BPTF PE=1 SV=2;>tr|E7ETD6|E7ETD6_HUMAN Nucleosome-remodeling factor subunit BPTF OS=Homo sapiens GN=BPTF PE=1 SV=3;>sp|Q12830-4|BPTF_HUMAN Isoform 4 of Nucleoso	0.86938	5	0.86938	2.2712	NaN	1.15025		0.440296	+	NaN		1	0.79527
P38435-2;Q53GV4;P38435;A7YA96;B4DQW4;F8WCF0;F8WB98;F8WDU9	Vitamin K-dependent gamma-carboxylase	GGCX	>sp|P38435-2|VKGC_HUMAN Isoform 2 of Vitamin K-dependent gamma-carboxylase OS=Homo sapiens GN=GGCX;>tr|Q53GV4|Q53GV4_HUMAN Gamma-glutamyl carboxylase variant (Fragment) OS=Homo sapiens PE=2 SV=1;>sp|P38435|VKGC_HUMAN Vitamin K-dependent gamma-carboxylase O	0.87023	3	NaN	0.70859	NaN	NaN		1.41125	+	NaN		1	1.41125
A5PLQ8;A1L177;E9PJP2;Q5TF21;H3BRB8	Protein SOGA3	C6orf174;SOGA3	>tr|A5PLQ8|A5PLQ8_HUMAN C6orf174 protein (Fragment) OS=Homo sapiens GN=C6orf174 PE=2 SV=1;>tr|A1L177|A1L177_HUMAN C6orf174 protein (Fragment) OS=Homo sapiens GN=C6orf174 PE=2 SV=1;>tr|E9PJP2|E9PJP2_HUMAN Protein SOGA3 OS=Homo sapiens GN=SOGA3 PE=4 SV=1;>sp	0.87077	6	4.4628	0.86203	0.94144	0.224075	+	1.16005		1.0622		1	1.0622
H0YIM9;X6R5R5;Q8WUH1;A0A024R6B7;Q8WUH1-2	Protein Churchill	CHURC1-FNTB;CHURC1	>tr|H0YIM9|H0YIM9_HUMAN Protein CHURC1-FNTB (Fragment) OS=Homo sapiens GN=CHURC1-FNTB PE=4 SV=1;>tr|X6R5R5|X6R5R5_HUMAN Churchill domain containing 1, isoform CRA_c OS=Homo sapiens GN=CHURC1 PE=4 SV=1;>sp|Q8WUH1|CHUR_HUMAN Protein Churchill OS=Homo sapiens	0.87085	4	NaN	0.51772	NaN	NaN		1.93155	+	NaN		1	1.93155
Q9UPZ3-2;Q9UPZ3;B3KNC8	Hermansky-Pudlak syndrome 5 protein	HPS5	>sp|Q9UPZ3-2|HPS5_HUMAN Isoform 2 of Hermansky-Pudlak syndrome 5 protein OS=Homo sapiens GN=HPS5;>sp|Q9UPZ3|HPS5_HUMAN Hermansky-Pudlak syndrome 5 protein OS=Homo sapiens GN=HPS5 PE=1 SV=2;>tr|B3KNC8|B3KNC8_HUMAN cDNA FLJ14258 fis, clone PLACE1001036, high	0.87266	4	0.87195	0.7673	NaN	1.14685		1.30327	+	NaN		1	1.22506
P57772;C9J8T0;Q96HZ6	Selenocysteine-specific elongation factor	EEFSEC	>sp|P57772|SELB_HUMAN Selenocysteine-specific elongation factor OS=Homo sapiens GN=EEFSEC PE=1 SV=4;>tr|C9J8T0|C9J8T0_HUMAN Selenocysteine-specific elongation factor OS=Homo sapiens GN=EEFSEC PE=1 SV=1;>tr|Q96HZ6|Q96HZ6_HUMAN EEFSEC protein OS=Homo sapiens	0.87272	10	0.90019	0.73964	0.87881	1.11088		1.35201	+	1.1379		1	1.1379
Q6ZMY0;Q9H6S0;D6RA70	Probable ATP-dependent RNA helicase YTHDC2	YTHDC2	>tr|Q6ZMY0|Q6ZMY0_HUMAN cDNA FLJ16598 fis, clone TESTI4006473, weakly similar to ATP-dependent RNA helicase A OS=Homo sapiens PE=2 SV=1;>sp|Q9H6S0|YTDC2_HUMAN Probable ATP-dependent RNA helicase YTHDC2 OS=Homo sapiens GN=YTHDC2 PE=1 SV=2	0.87447	8	0.87447	0.78382	1.494	1.14355		1.2758		0.669344	+	1	1.14355
B4DFY9;O60362;Q9NXG2;A0A024R388;Q6MZT3;J3KQB0	THUMP domain-containing protein 1	44M2.1;THUMPD1	>tr|B4DFY9|B4DFY9_HUMAN cDNA FLJ57359, highly similar to THUMP domain-containing protein 1 OS=Homo sapiens PE=2 SV=1;>tr|O60362|O60362_HUMAN Putative uncharacterized protein 44M2.1 OS=Homo sapiens GN=44M2.1 PE=1 SV=1;>sp|Q9NXG2|THUM1_HUMAN THUMP domain-con	0.87544	3	NaN	0.40518	NaN	NaN		2.46804	+	NaN		1	2.46804
Q6P1N0-2;Q6P1N0;Q9NX28;K7EJY5;Q9H8P7;K7EMP1;Q24K25	Coiled-coil and C2 domain-containing protein 1A	CC2D1A	>sp|Q6P1N0-2|C2D1A_HUMAN Isoform 2 of Coiled-coil and C2 domain-containing protein 1A OS=Homo sapiens GN=CC2D1A;>sp|Q6P1N0|C2D1A_HUMAN Coiled-coil and C2 domain-containing protein 1A OS=Homo sapiens GN=CC2D1A PE=1 SV=1;>tr|Q9NX28|Q9NX28_HUMAN cDNA FLJ20475	0.87659	4	0.90681	0.79848	0.63723	1.10277		1.25238		1.56929	+	1	1.25238
Q92667;Q92667-2;B4DN86;I3L0W0;I3L3K1;I3L364;I3L0K6;I3L2A2;I3L2N7;I3NI36	A-kinase anchor protein 1, mitochondrial	AKAP1	>sp|Q92667|AKAP1_HUMAN A-kinase anchor protein 1, mitochondrial OS=Homo sapiens GN=AKAP1 PE=1 SV=1;>sp|Q92667-2|AKAP1_HUMAN Isoform 2 of A-kinase anchor protein 1, mitochondrial OS=Homo sapiens GN=AKAP1;>tr|B4DN86|B4DN86_HUMAN cDNA FLJ56047, highly similar	0.87666	11	0.62499	0.87102	1.1046	1.60003	+	1.14808		0.905305		1	1.14808
J3KT68;B4DDT6;Q5BJF2	Transmembrane protein 97	TMEM97	>tr|J3KT68|J3KT68_HUMAN Transmembrane protein 97 OS=Homo sapiens GN=TMEM97 PE=1 SV=1;>tr|B4DDT6|B4DDT6_HUMAN cDNA FLJ60416 OS=Homo sapiens PE=2 SV=1;>sp|Q5BJF2|TMM97_HUMAN Transmembrane protein 97 OS=Homo sapiens GN=TMEM97 PE=1 SV=1	0.87683	4	0.73406	NaN	NaN	1.36229	+	NaN		NaN		1	1.36229
Q53HP5;Q53H87;O75891;O75891-3;Q59G10;Q9UFA9;Q8TBP8;O75891-2;B4DGC8	Cytosolic 10-formyltetrahydrofolate dehydrogenase	ALDH1L1;DKFZp434O2417	>tr|Q53HP5|Q53HP5_HUMAN Formyltetrahydrofolate dehydrogenase isoform a variant (Fragment) OS=Homo sapiens PE=2 SV=1;>tr|Q53H87|Q53H87_HUMAN Formyltetrahydrofolate dehydrogenase isoform a variant (Fragment) OS=Homo sapiens PE=2 SV=1;>sp|O75891|AL1L1_HUMAN C	0.87698	3	NaN	0.6527	NaN	NaN		1.5321	+	NaN		1	1.5321
D3DUJ0;Q9Y4W6;Q8TA92	AFG3-like protein 2	AFG3L2	>tr|D3DUJ0|D3DUJ0_HUMAN AFG3 ATPase family gene 3-like 2 (Yeast), isoform CRA_a (Fragment) OS=Homo sapiens GN=AFG3L2 PE=3 SV=1;>sp|Q9Y4W6|AFG32_HUMAN AFG3-like protein 2 OS=Homo sapiens GN=AFG3L2 PE=1 SV=2;>tr|Q8TA92|Q8TA92_HUMAN Similar to AFG3 ATPase fam	0.87823	6	0.98801	0.93515	0.7251	1.01214		1.06935		1.37912	+	1	1.06935
P09132;D6RBG4;P09132-2	Signal recognition particle 19 kDa protein	SRP19	>sp|P09132|SRP19_HUMAN Signal recognition particle 19 kDa protein OS=Homo sapiens GN=SRP19 PE=1 SV=3	0.87977	6	1.1245	0.87977	0.62432	0.889284		1.13666		1.60174	+	1	1.13666
J3QRM9;Q8N138-4;Q8N138;A0A024R1W6;J3KTF9;F8VXD5	ORM1-like protein 3	ORMDL3;ORMDL2	>tr|J3QRM9|J3QRM9_HUMAN ORM1-like protein 3 (Fragment) OS=Homo sapiens GN=ORMDL3 PE=4 SV=1;>sp|Q8N138-4|ORML3_HUMAN Isoform 2 of ORM1-like protein 3 OS=Homo sapiens GN=ORMDL3;>sp|Q8N138|ORML3_HUMAN ORM1-like protein 3 OS=Homo sapiens GN=ORMDL3 PE=1 SV=1;>t	0.88209	5	0.89979	0.33481	NaN	1.11137		2.98677	+	NaN		1	2.04907
P50552;A0A024R0V4;K7EM16;K7EIG8;K7ENR7;K7ENL7	Vasodilator-stimulated phosphoprotein	VASP	>sp|P50552|VASP_HUMAN Vasodilator-stimulated phosphoprotein OS=Homo sapiens GN=VASP PE=1 SV=3;>tr|A0A024R0V4|A0A024R0V4_HUMAN Vasodilator-stimulated phosphoprotein, isoform CRA_a OS=Homo sapiens GN=VASP PE=4 SV=1;>tr|K7EM16|K7EM16_HUMAN Vasodilator-stimula	0.88269	6	0.93654	0.87699	0.56746	1.06776		1.14026		1.76224	+	1	1.14026
P53350;B2R841;I3L387;Q58A51;D3DWF3;B4E083;Q59GD0	Serine/threonine-protein kinase PLK1	PLK1;Plk-1 delta	>sp|P53350|PLK1_HUMAN Serine/threonine-protein kinase PLK1 OS=Homo sapiens GN=PLK1 PE=1 SV=1;>tr|B2R841|B2R841_HUMAN cDNA, FLJ93730, highly similar to Homo sapiens polo-like kinase (Drosophila) (PLK), mRNA OS=Homo sapiens PE=2 SV=1;>tr|I3L387|I3L387_HUMAN	0.88475	4	NaN	0.48501	NaN	NaN		2.06181	+	NaN		1	2.06181
Q96T58;H0Y5U7;F6WRY4	Msx2-interacting protein	SPEN	>sp|Q96T58|MINT_HUMAN Msx2-interacting protein OS=Homo sapiens GN=SPEN PE=1 SV=1	0.8862	8	1.0421	0.98538	0.68943	0.959601		1.01484		1.45047	+	1	1.01484
B5MC59;P35244;A4D105	Replication protein A 14 kDa subunit	RPA3	>tr|B5MC59|B5MC59_HUMAN Replication protein A 14 kDa subunit OS=Homo sapiens GN=RPA3 PE=1 SV=1;>sp|P35244|RFA3_HUMAN Replication protein A 14 kDa subunit OS=Homo sapiens GN=RPA3 PE=1 SV=1;>tr|A4D105|A4D105_HUMAN Replication protein A3, 14kDa OS=Homo sapien	0.88883	3	NaN	0.67454	0.92391	NaN		1.48249	+	1.08236		1	1.28242
O14933-2;O14933	Ubiquitin/ISG15-conjugating enzyme E2 L6	UBE2L6	>sp|O14933-2|UB2L6_HUMAN Isoform 2 of Ubiquitin/ISG15-conjugating enzyme E2 L6 OS=Homo sapiens GN=UBE2L6;>sp|O14933|UB2L6_HUMAN Ubiquitin/ISG15-conjugating enzyme E2 L6 OS=Homo sapiens GN=UBE2L6 PE=1 SV=4	0.88952	5	0.98457	0.71707	NaN	1.01567		1.39456	+	NaN		1	1.20512
Q75MT9;Q6FHZ0;P40926;A0A024R4K3;Q0QF37;P40926-2;G3XAL0;B3KTM1	Malate dehydrogenase;Malate dehydrogenase, mitochondrial	MDH2	>tr|Q75MT9|Q75MT9_HUMAN Malate dehydrogenase (Fragment) OS=Homo sapiens GN=MDH2 PE=3 SV=1;>tr|Q6FHZ0|Q6FHZ0_HUMAN Malate dehydrogenase OS=Homo sapiens GN=MDH2 PE=2 SV=1;>sp|P40926|MDHM_HUMAN Malate dehydrogenase, mitochondrial OS=Homo sapiens GN=MDH2 PE=1	0.89032	189	0.89172	0.76516	0.92329	1.12143		1.30692	+	1.08308		1	1.12143
P13674-3;Q5VSQ6;P13674-2;P13674	Prolyl 4-hydroxylase subunit alpha-1	P4HA1	>sp|P13674-3|P4HA1_HUMAN Isoform 3 of Prolyl 4-hydroxylase subunit alpha-1 OS=Homo sapiens GN=P4HA1;>tr|Q5VSQ6|Q5VSQ6_HUMAN Procollagen-proline, 2-oxoglutarate 4-dioxygenase (Proline 4-hydroxylase), alpha polypeptide I variant (Fragment) OS=Homo sapiens GN	0.89169	4	0.84028	1.0769	0.65602	1.19008		0.928591		1.52434	+	1	1.19008
Q6NTF9;Q9UDT1;Q6NTF9-2	Rhomboid domain-containing protein 2	RHBDD2;WUGSC:H_RG122E10.2a	>sp|Q6NTF9|RHBD2_HUMAN Rhomboid domain-containing protein 2 OS=Homo sapiens GN=RHBDD2 PE=2 SV=2;>tr|Q9UDT1|Q9UDT1_HUMAN Rhomboid domain-containing protein 2 OS=Homo sapiens GN=WUGSC:H_RG122E10.2a PE=4 SV=1;>sp|Q6NTF9-2|RHBD2_HUMAN Isoform 2 of Rhomboid dom	0.8923	3	4.1239	0.90277	0.92132	0.242489	+	1.1077		1.0854		1	1.0854
A0A024RBS6;F5H1S9;G8JLB3;Q9Y606-2;E5KMT6;Q9Y606;E5KMT5;F5GY32;F5GXL3;F5H168;F8W9U5;F5H1B2	tRNA pseudouridine synthase;tRNA pseudouridine synthase A, mitochondrial	PUS1	>tr|A0A024RBS6|A0A024RBS6_HUMAN tRNA pseudouridine synthase OS=Homo sapiens GN=PUS1 PE=3 SV=1;>tr|F5H1S9|F5H1S9_HUMAN tRNA pseudouridine synthase OS=Homo sapiens GN=PUS1 PE=1 SV=1;>tr|G8JLB3|G8JLB3_HUMAN tRNA pseudouridine synthase (Fragment) OS=Homo sapie	0.89264	11	0.72377	0.82145	0.90336	1.38165	+	1.21736		1.10698		1	1.21736
Q9BTD8-4;Q9BTD8-2;Q9BTD8-3;K7EP90;Q9BTD8;K7EQ03;B4DWT0;K7EML2;K7ER08	RNA-binding protein 42	RBM42	>sp|Q9BTD8-4|RBM42_HUMAN Isoform 4 of RNA-binding protein 42 OS=Homo sapiens GN=RBM42;>sp|Q9BTD8-2|RBM42_HUMAN Isoform 2 of RNA-binding protein 42 OS=Homo sapiens GN=RBM42;>sp|Q9BTD8-3|RBM42_HUMAN Isoform 3 of RNA-binding protein 42 OS=Homo sapiens GN=RBM4	0.89277	4	0.85861	1.0086	0.71339	1.16467		0.991473		1.40176	+	1	1.16467
B4E063;Q9BW19;A0A024RCS7;B4DMA8	Kinesin-like protein KIFC1	KIFC1	>tr|B4E063|B4E063_HUMAN cDNA FLJ54292, highly similar to Kinesin-like protein KIFC1 OS=Homo sapiens PE=2 SV=1;>sp|Q9BW19|KIFC1_HUMAN Kinesin-like protein KIFC1 OS=Homo sapiens GN=KIFC1 PE=1 SV=2;>tr|A0A024RCS7|A0A024RCS7_HUMAN Kinesin family member C1, iso	0.89294	8	0.742	0.94021	0.89212	1.34771	+	1.06359		1.12093		1	1.12093
Q9H857-4;Q9H857;Q9H857-3;Q9H857-2;H7C519;C9J036;H7C4G8	5-nucleotidase domain-containing protein 2	NT5DC2	>sp|Q9H857-4|NT5D2_HUMAN Isoform 4 of 5-nucleotidase domain-containing protein 2 OS=Homo sapiens GN=NT5DC2;>sp|Q9H857|NT5D2_HUMAN 5-nucleotidase domain-containing protein 2 OS=Homo sapiens GN=NT5DC2 PE=1 SV=1;>sp|Q9H857-3|NT5D2_HUMAN Isoform 3 of 5-nucl	0.89346	6	0.93552	0.50643	NaN	1.06892		1.97461	+	NaN		1	1.52177
Q6FHV6;P09104;A8K3B0;P09104-2;F5H0C8;F5H1C3;U3KQP4	Gamma-enolase;Enolase	ENO2	>tr|Q6FHV6|Q6FHV6_HUMAN ENO2 protein OS=Homo sapiens GN=ENO2 PE=2 SV=1;>sp|P09104|ENOG_HUMAN Gamma-enolase OS=Homo sapiens GN=ENO2 PE=1 SV=3;>tr|A8K3B0|A8K3B0_HUMAN cDNA FLJ77877, highly similar to Human ENO2 neuron specific (gamma) enolase OS=Homo sapiens	0.89353	76	0.90805	0.66289	0.95009	1.10126		1.50855	+	1.05253		1	1.10126
Q8WVP7;A8K4S2;H0Y6V6;Q8WVP7-3;F8WEN8;H0YHZ2;Q8WVP7-2;Q6UX01-3;Q6UX01-4;A0A024R0Z6;Q6UX01-2;Q6UX01;A0A024R0Y9	Limb region 1 protein homolog;Protein LMBR1L	LMBR1;LMBR1L	>sp|Q8WVP7|LMBR1_HUMAN Limb region 1 protein homolog OS=Homo sapiens GN=LMBR1 PE=1 SV=1;>tr|A8K4S2|A8K4S2_HUMAN cDNA FLJ76279, highly similar to Homo sapiens limb region 1 homolog (mouse) (LMBR1), mRNA OS=Homo sapiens PE=2 SV=1;>tr|H0Y6V6|H0Y6V6_HUMAN Limb	0.89377	3	0.62577	NaN	NaN	1.59803	+	NaN		NaN		1	1.59803
A0A024QZB1;O15047;C9J2Z9	Histone-lysine N-methyltransferase SETD1A	SETD1A	>tr|A0A024QZB1|A0A024QZB1_HUMAN HCG1998636, isoform CRA_a OS=Homo sapiens GN=hCG_1998636 PE=4 SV=1;>sp|O15047|SET1A_HUMAN Histone-lysine N-methyltransferase SETD1A OS=Homo sapiens GN=SETD1A PE=1 SV=3	0.89421	4	0.89421	0.75075	NaN	1.11831		1.332	+	NaN		1	1.22515
Q7L1V2-2;Q6ZR87;E7EW32;Q7L1V2;B3KN76;H3BUX9;B4DKA0	Vacuolar fusion protein MON1 homolog B	MON1B	>sp|Q7L1V2-2|MON1B_HUMAN Isoform 2 of Vacuolar fusion protein MON1 homolog B OS=Homo sapiens GN=MON1B;>tr|Q6ZR87|Q6ZR87_HUMAN cDNA FLJ46554 fis, clone THYMU3038970 OS=Homo sapiens PE=2 SV=1;>tr|E7EW32|E7EW32_HUMAN Vacuolar fusion protein MON1 homolog B OS=	0.89574	3	5.4767	0.78473	NaN	0.182592	+	1.27432		NaN		1	0.728458
G3V5V3;O60524-4;O60524-5;O60524-3;O60524;G3V4D9;G3V547	Nuclear export mediator factor NEMF	NEMF	>tr|G3V5V3|G3V5V3_HUMAN Nuclear export mediator factor NEMF (Fragment) OS=Homo sapiens GN=NEMF PE=1 SV=2;>sp|O60524-4|NEMF_HUMAN Isoform 4 of Nuclear export mediator factor NEMF OS=Homo sapiens GN=NEMF;>sp|O60524-5|NEMF_HUMAN Isoform 5 of Nuclear export me	0.89684	11	0.89684	0.71997	0.97814	1.11503		1.38895	+	1.02235		1	1.11503
Q9UPW5-2;A0A024R288;Q9UPW5;Q9UPW5-3;B4DHX2;Q5VZW3	Cytosolic carboxypeptidase 1	AGTPBP1	>sp|Q9UPW5-2|CBPC1_HUMAN Isoform 2 of Cytosolic carboxypeptidase 1 OS=Homo sapiens GN=AGTPBP1;>tr|A0A024R288|A0A024R288_HUMAN ATP/GTP binding protein 1, isoform CRA_a OS=Homo sapiens GN=AGTPBP1 PE=4 SV=1;>sp|Q9UPW5|CBPC1_HUMAN Cytosolic carboxypeptidase 1	0.8969	3	0.91448	1.036	1.5784	1.09352		0.965251		0.633553	+	1	0.965251
F8WBU5;C9J391;C9J1C6;Q9P0P0	E3 ubiquitin-protein ligase RNF181	RNF181	>tr|F8WBU5|F8WBU5_HUMAN E3 ubiquitin-protein ligase RNF181 OS=Homo sapiens GN=RNF181 PE=4 SV=1;>tr|C9J391|C9J391_HUMAN E3 ubiquitin-protein ligase RNF181 (Fragment) OS=Homo sapiens GN=RNF181 PE=4 SV=1;>tr|C9J1C6|C9J1C6_HUMAN E3 ubiquitin-protein ligase RNF	0.8969	3	0.88322	0.7244	0.8057	1.13222		1.38045	+	1.24116		1	1.24116
Q9NQ88	Fructose-2,6-bisphosphatase TIGAR	TIGAR	>sp|Q9NQ88|TIGAR_HUMAN Fructose-2,6-bisphosphatase TIGAR OS=Homo sapiens GN=TIGAR PE=1 SV=1	0.90086	11	0.81411	0.98602	0.73879	1.22834		1.01418		1.35356	+	1	1.22834
Q14C86-4;Q14C86-5;Q14C86-2;A0A024R862;Q14C86;Q14C86-6;A0A024R8A2;F8W9S7;Q14C86-3;A0A024R875;B3KN67;C9IZ08;B4DK42;B4DGD8;H0Y4E7;H0Y7I9;B3KTX2;B0QZ65;B3KMM3;C9IZX9	GTPase-activating protein and VPS9 domain-containing protein 1	GAPVD1	>sp|Q14C86-4|GAPD1_HUMAN Isoform 4 of GTPase-activating protein and VPS9 domain-containing protein 1 OS=Homo sapiens GN=GAPVD1;>sp|Q14C86-5|GAPD1_HUMAN Isoform 5 of GTPase-activating protein and VPS9 domain-containing protein 1 OS=Homo sapiens GN=GAPVD1;>s	0.90121	25	1.0029	0.9456	0.75064	0.997108		1.05753		1.3322	+	1	1.05753
P46934-4;A0A024R5S9;P46934-2;P46934;H0Y8X6;P46934-3	E3 ubiquitin-protein ligase NEDD4;E3 ubiquitin-protein ligase	NEDD4	>sp|P46934-4|NEDD4_HUMAN Isoform 4 of E3 ubiquitin-protein ligase NEDD4 OS=Homo sapiens GN=NEDD4;>tr|A0A024R5S9|A0A024R5S9_HUMAN E3 ubiquitin-protein ligase OS=Homo sapiens GN=NEDD4 PE=4 SV=1;>sp|P46934-2|NEDD4_HUMAN Isoform 2 of E3 ubiquitin-protein ligas	0.90333	5	0.90658	1.0418	1.4116	1.10305		0.959877		0.708416	+	1	0.959877
Q12893;B2RAF3;A0A024R2Y2	Transmembrane protein 115	TMEM115	>sp|Q12893|TM115_HUMAN Transmembrane protein 115 OS=Homo sapiens GN=TMEM115 PE=1 SV=1;>tr|B2RAF3|B2RAF3_HUMAN cDNA, FLJ94877, highly similar to Homo sapiens placental protein 6 (PL6), mRNA OS=Homo sapiens PE=2 SV=1;>tr|A0A024R2Y2|A0A024R2Y2_HUMAN Transmemb	0.90334	5	0.72088	1.2345	0.89732	1.38719	+	0.810045		1.11443		1	1.11443
Q6QN92;Q6IAT2;Q53XL7;P23434	Glycine cleavage system H protein, mitochondrial	GCSH	>tr|Q6QN92|Q6QN92_HUMAN Mitochondrial glycine cleavage system H-protein (Fragment) OS=Homo sapiens PE=2 SV=1;>tr|Q6IAT2|Q6IAT2_HUMAN GCSH protein OS=Homo sapiens GN=GCSH PE=2 SV=1;>tr|Q53XL7|Q53XL7_HUMAN Glycine cleavage system protein H (Aminomethyl carri	0.90465	8	0.71263	0.99754	0.95381	1.40325	+	1.00247		1.04843		1	1.04843
V9HW31;P06576;Q0QEN7;F8VPV9;H0YH81;F8W079;F8W0P7;F8VQY0;H0YI37	ATP synthase subunit beta, mitochondrial;ATP synthase subunit beta	ATP5B	>tr|V9HW31|V9HW31_HUMAN ATP synthase subunit beta OS=Homo sapiens GN=HEL-S-271 PE=2 SV=1;>sp|P06576|ATPB_HUMAN ATP synthase subunit beta, mitochondrial OS=Homo sapiens GN=ATP5B PE=1 SV=3;>tr|Q0QEN7|Q0QEN7_HUMAN ATP synthase subunit beta (Fragment) OS=Homo	0.90544	172	0.9176	0.74027	1.0132	1.0898		1.35086	+	0.986972		1	1.0898
Q96GM5;A0A024R102;Q96GM5-2;A0A024R137;B4DF50;A8K9I5;F8VRQ4;F8VUB0;H0YHV1;F8VZ70;F8VW95	SWI/SNF-related matrix-associated actin-dependent regulator of chromatin subfamily D member 1	SMARCD1	>sp|Q96GM5|SMRD1_HUMAN SWI/SNF-related matrix-associated actin-dependent regulator of chromatin subfamily D member 1 OS=Homo sapiens GN=SMARCD1 PE=1 SV=2;>tr|A0A024R102|A0A024R102_HUMAN SWI/SNF related, matrix associated, actin dependent regulator of chrom	0.90678	9	0.95183	0.95375	0.50687	1.05061		1.04849		1.97289	+	1	1.05061
P26232-3;P26232-2;P26232-5;P26232;C9J144;C9IZ88;Q49AD3	Catenin alpha-2	CTNNA2	>sp|P26232-3|CTNA2_HUMAN Isoform 3 of Catenin alpha-2 OS=Homo sapiens GN=CTNNA2;>sp|P26232-2|CTNA2_HUMAN Isoform 2 of Catenin alpha-2 OS=Homo sapiens GN=CTNNA2;>sp|P26232-5|CTNA2_HUMAN Isoform 5 of Catenin alpha-2 OS=Homo sapiens GN=CTNNA2;>sp|P26232|CTNA2	0.91073	5	0.90812	NaN	0.57406	1.10118		NaN		1.74198	+	1	1.42158
Q9HBM8;Q71VH6;B4DRH1;Q99943;A0A024RCV5;B3KPH3	1-acyl-sn-glycerol-3-phosphate acyltransferase alpha	AGPAT1	>tr|Q9HBM8|Q9HBM8_HUMAN 1-acyl-sn-glycerol-3-phosphate acyltransferase alpha OS=Homo sapiens GN=AGPAT1 PE=2 SV=1;>tr|Q71VH6|Q71VH6_HUMAN Putative uncharacterized protein (Fragment) OS=Homo sapiens PE=2 SV=1;>tr|B4DRH1|B4DRH1_HUMAN cDNA FLJ54610, highly sim	0.9123	16	0.95495	0.73713	0.76444	1.04718		1.35661	+	1.30815		1	1.30815
Q3KQU3-2;Q3KQU3-4;D3DPS3;Q3KQU3;E9PLH3;C9JIR3;B3KU03;A1L1B7;Q3KQU3-3;Q6NX58	MAP7 domain-containing protein 1	MAP7D1;RPRC1	>sp|Q3KQU3-2|MA7D1_HUMAN Isoform 2 of MAP7 domain-containing protein 1 OS=Homo sapiens GN=MAP7D1;>sp|Q3KQU3-4|MA7D1_HUMAN Isoform 4 of MAP7 domain-containing protein 1 OS=Homo sapiens GN=MAP7D1;>tr|D3DPS3|D3DPS3_HUMAN Arginine/proline rich coiled-coil 1, i	0.91231	4	0.72984	0.91231	NaN	1.37016	+	1.09612		NaN		1	1.23314
B4DGI9;Q99081;A0A024R5T1;E9PGY0;Q99081-3;A0A024R5Z0;B4DZP2;B4E1W1;Q99081-2;F5GY10;B4DZH5;H0YML2;Q9NQY2;H0YNQ5;B4DZ50;H0YNP8;Q59ES0;P15884-16;P15884-6;P15884-2;B4DH96;P15884-9;P15884-8;P15884-15;P15884-7;P15884-11;P15884-5;P15884-4;P15884-10;H3BPJ7;P15884-14;P15884-13;P15884-12;P15884;B3KVA4;A0A024R2C0;P15884-3;H3BTP3;E9PH57	Transcription factor 12	TCF12	>tr|B4DGI9|B4DGI9_HUMAN Transcription factor 12 (Fragment) OS=Homo sapiens GN=TCF12 PE=1 SV=1;>sp|Q99081|HTF4_HUMAN Transcription factor 12 OS=Homo sapiens GN=TCF12 PE=1 SV=1;>tr|A0A024R5T1|A0A024R5T1_HUMAN Transcription factor 12 (HTF4, helix-loop-helix t	0.91231	4	NaN	0.73989	NaN	NaN		1.35155	+	NaN		1	1.35155
P08579;B5BTZ8;Q86YK2	U2 small nuclear ribonucleoprotein B	SNRPB2	>sp|P08579|RU2B_HUMAN U2 small nuclear ribonucleoprotein B OS=Homo sapiens GN=SNRPB2 PE=1 SV=1;>tr|B5BTZ8|B5BTZ8_HUMAN Small nuclear ribonucleoprotein polypeptide B OS=Homo sapiens GN=SNRPB2 PE=2 SV=1;>tr|Q86YK2|Q86YK2_HUMAN Similar to small nuclear ri	0.91248	5	1.6523	1.1031	0.99772	0.605217	+	0.906536		1.00229		1	0.906536
Q6GYQ0-4;Q6GYQ0;Q6GYQ0-7;Q6GYQ0-5;Q6GYQ0-6;Q6GYQ0-2;Q6GYQ0-3;A0PJ59;H7BZA8;H0YJ04;Q9Y408;Q9H984;H0YJB5	Ral GTPase-activating protein subunit alpha-1	RALGAPA1	>sp|Q6GYQ0-4|RGPA1_HUMAN Isoform 4 of Ral GTPase-activating protein subunit alpha-1 OS=Homo sapiens GN=RALGAPA1;>sp|Q6GYQ0|RGPA1_HUMAN Ral GTPase-activating protein subunit alpha-1 OS=Homo sapiens GN=RALGAPA1 PE=1 SV=1;>sp|Q6GYQ0-7|RGPA1_HUMAN Isoform 7 of	0.91527	7	0.97298	1.0096	1.8912	1.02777		0.990491		0.528765	+	1	0.990491
J3KNA1;B7Z2M7;Q12840;B2RCP3;B0I1S7;A5D6Y6	Kinesin heavy chain isoform 5A	KIF5A	>tr|J3KNA1|J3KNA1_HUMAN Kinesin heavy chain isoform 5A OS=Homo sapiens GN=KIF5A PE=1 SV=1;>tr|B7Z2M7|B7Z2M7_HUMAN cDNA FLJ53380, highly similar to Kinesin heavy chain isoform 5A OS=Homo sapiens PE=2 SV=1;>sp|Q12840|KIF5A_HUMAN Kinesin heavy chain isoform 5	0.91553	3	0.92974	NaN	0.73959	1.07557		NaN		1.3521	+	1	1.21384
B3KQ43;Q9HCE1-2;B7Z700;Q5JR04;Q9HCE1	Putative helicase MOV-10	MOV10	>tr|B3KQ43|B3KQ43_HUMAN cDNA FLJ32791 fis, clone TESTI2002365, highly similar to helicase MOV-10 (EC 3.6.1.-) OS=Homo sapiens PE=2 SV=1;>sp|Q9HCE1-2|MOV10_HUMAN Isoform 2 of Putative helicase MOV-10 OS=Homo sapiens GN=MOV10;>tr|B7Z700|B7Z700_HUMAN cDNA FLJ	0.91739	3	NaN	NaN	0.67943	NaN		NaN		1.47182	+	1	1.47182
V9HWC5;Q00169;F5GWE5;Q6NUL6;I3L471;I3L4U7;B4E1U1	Phosphatidylinositol transfer protein alpha isoform	PITPNA	>tr|V9HWC5|V9HWC5_HUMAN Epididymis secretory protein Li 36 OS=Homo sapiens GN=HEL-S-36 PE=2 SV=1;>sp|Q00169|PIPNA_HUMAN Phosphatidylinositol transfer protein alpha isoform OS=Homo sapiens GN=PITPNA PE=1 SV=2;>tr|F5GWE5|F5GWE5_HUMAN Phosphatidylinositol tra	0.918	7	0.95333	0.918	0.57855	1.04895		1.08932		1.72846	+	1	1.08932
H7C0V0;Q8WWC4;A0A024R3U8	Uncharacterized protein C2orf47, mitochondrial	C2orf47	>tr|H7C0V0|H7C0V0_HUMAN Uncharacterized protein C2orf47, mitochondrial (Fragment) OS=Homo sapiens GN=C2orf47 PE=1 SV=1;>sp|Q8WWC4|CB047_HUMAN Uncharacterized protein C2orf47, mitochondrial OS=Homo sapiens GN=C2orf47 PE=1 SV=1;>tr|A0A024R3U8|A0A024R3U8_HUMA	0.91801	4	0.92517	0.76689	NaN	1.08088		1.30397	+	NaN		1	1.19243
Q9Y237;Q9Y237-2;H0Y4T6;J3KMW3;H0Y8P6;H0Y610;Q9Y237-3	Peptidyl-prolyl cis-trans isomerase NIMA-interacting 4	PIN4	>sp|Q9Y237|PIN4_HUMAN Peptidyl-prolyl cis-trans isomerase NIMA-interacting 4 OS=Homo sapiens GN=PIN4 PE=1 SV=1;>sp|Q9Y237-2|PIN4_HUMAN Isoform 2 of Peptidyl-prolyl cis-trans isomerase NIMA-interacting 4 OS=Homo sapiens GN=PIN4	0.91805	5	0.91805	0.74531	0.82577	1.08927		1.34172	+	1.21099		1	1.21099
P49790-2;P49790;A0A024QZW7;P49790-3	Nuclear pore complex protein Nup153	NUP153	>sp|P49790-2|NU153_HUMAN Isoform 2 of Nuclear pore complex protein Nup153 OS=Homo sapiens GN=NUP153;>sp|P49790|NU153_HUMAN Nuclear pore complex protein Nup153 OS=Homo sapiens GN=NUP153 PE=1 SV=2;>tr|A0A024QZW7|A0A024QZW7_HUMAN Nucleoporin 153kDa, isoform C	0.91836	5	0.93154	1.3497	0.90422	1.07349		0.740905	+	1.10593		1	1.07349
Q9Y6C2;Q9Y6C2-2	EMILIN-1	EMILIN1	>sp|Q9Y6C2|EMIL1_HUMAN EMILIN-1 OS=Homo sapiens GN=EMILIN1 PE=1 SV=2;>sp|Q9Y6C2-2|EMIL1_HUMAN Isoform 2 of EMILIN-1 OS=Homo sapiens GN=EMILIN1	0.92231	11	1.0809	0.91078	3.4168	0.925155		1.09796		0.292672	+	1	0.925155
O95453-2;O95453-3;O95453;H3BRK1;B3KN69;B4DSB0;F5H1Z4;B4E0E8	Poly(A)-specific ribonuclease PARN	PARN	>sp|O95453-2|PARN_HUMAN Isoform 2 of Poly(A)-specific ribonuclease PARN OS=Homo sapiens GN=PARN;>sp|O95453-3|PARN_HUMAN Isoform 3 of Poly(A)-specific ribonuclease PARN OS=Homo sapiens GN=PARN;>sp|O95453|PARN_HUMAN Poly(A)-specific ribonuclease PARN OS=Homo	0.92285	4	0.90385	0.83788	1.3668	1.10638		1.19349		0.731636	+	1	1.10638
U3KPZ7;Q9P2N5;D3DQF6;B3KY61;Q05DK9	RNA-binding protein 27	RBM27;POU4F3	>tr|U3KPZ7|U3KPZ7_HUMAN RNA-binding protein 27 OS=Homo sapiens GN=RBM27 PE=1 SV=1;>sp|Q9P2N5|RBM27_HUMAN RNA-binding protein 27 OS=Homo sapiens GN=RBM27 PE=1 SV=2;>tr|D3DQF6|D3DQF6_HUMAN POU domain, class 4, transcription factor 3, isoform CRA_a OS=Homo sa	0.92313	9	1.3469	0.76883	0.79603	0.742446		1.30068	+	1.25623		1	1.25623
Q9NTX5-3;Q9NTX5-6;Q9NTX5-2;Q9NTX5	Ethylmalonyl-CoA decarboxylase	ECHDC1	>sp|Q9NTX5-3|ECHD1_HUMAN Isoform 3 of Ethylmalonyl-CoA decarboxylase OS=Homo sapiens GN=ECHDC1;>sp|Q9NTX5-6|ECHD1_HUMAN Isoform 6 of Ethylmalonyl-CoA decarboxylase OS=Homo sapiens GN=ECHDC1;>sp|Q9NTX5-2|ECHD1_HUMAN Isoform 2 of Ethylmalonyl-CoA decarboxyla	0.92448	7	NaN	0.68898	0.98014	NaN		1.45142	+	1.02026		1	1.23584
Q9BTA9-5;Q9BTA9-2;Q9BTA9;Q9BTA9-3;E9PMZ7;C9JMU2;C9JVK6;C9JD58;J3QTA0;B4DMH1	WW domain-containing adapter protein with coiled-coil	WAC	>sp|Q9BTA9-5|WAC_HUMAN Isoform 4 of WW domain-containing adapter protein with coiled-coil OS=Homo sapiens GN=WAC;>sp|Q9BTA9-2|WAC_HUMAN Isoform 2 of WW domain-containing adapter protein with coiled-coil OS=Homo sapiens GN=WAC;>sp|Q9BTA9|WAC_HUMAN WW domain	0.92607	4	NaN	NaN	2.0783	NaN		NaN		0.481162	+	1	0.481162
P57076;G8XV63;C9J818;H7BZW1;H7C2R6;Q8N9H5;C9JX57;F5GXV2;B4DV81;Q96NJ2;D3DSE6;F8VZ95	Uncharacterized protein C21orf59	C21orf59	>sp|P57076|CU059_HUMAN UPF0769 protein C21orf59 OS=Homo sapiens GN=C21orf59 PE=1 SV=1;>tr|G8XV63|G8XV63_HUMAN Prostate cancer upregulated protein 1 OS=Homo sapiens PE=2 SV=1;>tr|C9J818|C9J818_HUMAN UPF0769 protein C21orf59 OS=Homo sapiens GN=C21orf59 PE=1	0.9271	6	1.0309	1.4103	0.86564	0.970026		0.709069	+	1.15521		1	0.970026
P53609;P53609-2	Geranylgeranyl transferase type-1 subunit beta	PGGT1B	>sp|P53609|PGTB1_HUMAN Geranylgeranyl transferase type-1 subunit beta OS=Homo sapiens GN=PGGT1B PE=1 SV=2;>sp|P53609-2|PGTB1_HUMAN Isoform 2 of Geranylgeranyl transferase type-1 subunit beta OS=Homo sapiens GN=PGGT1B	0.92732	4	NaN	NaN	0.45882	NaN		NaN		2.1795	+	1	2.1795
Q8WVK2;A8K513;B8ZZ98	U4/U6.U5 small nuclear ribonucleoprotein 27 kDa protein	SNRNP27;hCG_1994066	>sp|Q8WVK2|SNR27_HUMAN U4/U6.U5 small nuclear ribonucleoprotein 27 kDa protein OS=Homo sapiens GN=SNRNP27 PE=1 SV=1;>tr|A8K513|A8K513_HUMAN HCG1994066, isoform CRA_a OS=Homo sapiens GN=hCG_1994066 PE=2 SV=1;>tr|B8ZZ98|B8ZZ98_HUMAN U4/U6.U5 small nuclear ri	0.92946	5	1.0005	0.72562	NaN	0.9995		1.37813	+	NaN		1	1.18882
Q9Y4F1;Q9Y4F1-2;C9JME2;M0QYB0;Q9Y4F1-3;H0Y783;M0QXT1	FERM, RhoGEF and pleckstrin domain-containing protein 1	FARP1	>sp|Q9Y4F1|FARP1_HUMAN FERM, RhoGEF and pleckstrin domain-containing protein 1 OS=Homo sapiens GN=FARP1 PE=1 SV=1;>sp|Q9Y4F1-2|FARP1_HUMAN Isoform 2 of FERM, RhoGEF and pleckstrin domain-containing protein 1 OS=Homo sapiens GN=FARP1;>tr|C9JME2|C9JME2_HUMAN	0.93078	7	0.73167	0.90094	0.93078	1.36674	+	1.10995		1.07437		1	1.10995
Q9H488;B4DUV4;Q9H488-2;B4DZS3	GDP-fucose protein O-fucosyltransferase 1	POFUT1	>sp|Q9H488|OFUT1_HUMAN GDP-fucose protein O-fucosyltransferase 1 OS=Homo sapiens GN=POFUT1 PE=1 SV=1;>tr|B4DUV4|B4DUV4_HUMAN GDP-fucose protein O-fucosyltransferase 1 OS=Homo sapiens GN=POFUT1 PE=1 SV=1;>sp|Q9H488-2|OFUT1_HUMAN Isoform 2 of GDP-fucose prot	0.93082	3	0.87445	NaN	1.6344	1.14358		NaN		0.611845	+	1	0.877711
P42694;A0A024R8K8;J3QS41;B7ZLW2;P42694-2	Probable helicase with zinc finger domain	HELZ	>sp|P42694|HELZ_HUMAN Probable helicase with zinc finger domain OS=Homo sapiens GN=HELZ PE=1 SV=2;>tr|A0A024R8K8|A0A024R8K8_HUMAN Helicase with zinc finger, isoform CRA_a OS=Homo sapiens GN=HELZ PE=4 SV=1;>tr|J3QS41|J3QS41_HUMAN Probable helicase with zinc	0.93107	4	0.79986	0.84693	0.20531	1.25022		1.18074		4.87068	+	1	1.25022
Q15102;A0A024R0L6;M0R389;M0QXS6;M0R323;M0QZT2;M0R1K3	Platelet-activating factor acetylhydrolase IB subunit gamma	PAFAH1B3	>sp|Q15102|PA1B3_HUMAN Platelet-activating factor acetylhydrolase IB subunit gamma OS=Homo sapiens GN=PAFAH1B3 PE=1 SV=1;>tr|A0A024R0L6|A0A024R0L6_HUMAN Platelet-activating factor acetylhydrolase, isoform Ib, gamma subunit 29kDa, isoform CRA_a OS=Homo sapi	0.93137	16	0.89314	1.015	0.69537	1.11965		0.985222		1.43808	+	1	1.11965
Q96T60;M0R3C8;Q96T60-2;M0QYH2;M0QX49;M0QYI1	Bifunctional polynucleotide phosphatase/kinase;Polynucleotide 3-phosphatase;Polynucleotide 5-hydroxyl-kinase	PNKP	>sp|Q96T60|PNKP_HUMAN Bifunctional polynucleotide phosphatase/kinase OS=Homo sapiens GN=PNKP PE=1 SV=1;>tr|M0R3C8|M0R3C8_HUMAN Bifunctional polynucleotide phosphatase/kinase OS=Homo sapiens GN=PNKP PE=1 SV=1;>sp|Q96T60-2|PNKP_HUMAN Isoform 2 of Bifunctiona	0.93184	3	0.83427	0.76645	NaN	1.19865		1.30472	+	NaN		1	1.25168
B2R7W0;P13995;Q7Z650;B4DY35;B8ZZU9;B9A062;Q9H903-3;F8W7P9	Bifunctional methylenetetrahydrofolate dehydrogenase/cyclohydrolase, mitochondrial;NAD-dependent methylenetetrahydrofolate dehydrogenase;Methenyltetrahydrofolate cyclohydrolase	MTHFD2	>tr|B2R7W0|B2R7W0_HUMAN cDNA, FLJ93628, Homo sapiens methylene tetrahydrofolate dehydrogenase (NAD+dependent), methenyltetrahydrofolate cyclohydrolase (MTHFD2),nuclear gene encoding mitochondrial protein, mRNA OS=Homo sapiens PE=2 SV=1;>sp|P13995|MTDC_HUMA	0.93216	8	0.91207	1.3698	1.116	1.09641		0.730034	+	0.896057		1	0.896057
Q9NXC8;I3L2K5;Q8IWR0;I3L2N8	Zinc finger CCCH domain-containing protein 7A	ZC3H7A	>tr|Q9NXC8|Q9NXC8_HUMAN cDNA FLJ20318 fis, clone HEP08704 (Fragment) OS=Homo sapiens PE=2 SV=1;>tr|I3L2K5|I3L2K5_HUMAN Zinc finger CCCH domain-containing protein 7A (Fragment) OS=Homo sapiens GN=ZC3H7A PE=1 SV=1;>sp|Q8IWR0|Z3H7A_HUMAN Zinc finger CCCH doma	0.93244	5	0.93927	0.58111	0.85734	1.06466		1.72084	+	1.1664		1	1.1664
Q9BU61;Q9Y3Z0;Q9BU61-2;A4FU71	NADH dehydrogenase [ubiquinone] 1 alpha subcomplex assembly factor 3	NDUFAF3;DKFZp564J0123;C3orf60	>sp|Q9BU61|NDUF3_HUMAN NADH dehydrogenase [ubiquinone] 1 alpha subcomplex assembly factor 3 OS=Homo sapiens GN=NDUFAF3 PE=1 SV=1;>tr|Q9Y3Z0|Q9Y3Z0_HUMAN Putative uncharacterized protein DKFZp564J0123 OS=Homo sapiens GN=DKFZp564J0123 PE=2 SV=2;>sp|Q9BU61-2|	0.93376	6	0.9234	0.71562	NaN	1.08295		1.39739	+	NaN		1	1.24017
Q8TDM6-2;Q8TDM6-4;Q8TDM6	Disks large homolog 5	DLG5	>sp|Q8TDM6-2|DLG5_HUMAN Isoform 2 of Disks large homolog 5 OS=Homo sapiens GN=DLG5;>sp|Q8TDM6-4|DLG5_HUMAN Isoform 4 of Disks large homolog 5 OS=Homo sapiens GN=DLG5;>sp|Q8TDM6|DLG5_HUMAN Disks large homolog 5 OS=Homo sapiens GN=DLG5 PE=1 SV=4	0.93582	4	NaN	NaN	0.67194	NaN		NaN		1.48823	+	1	1.48823
K7EM13;K7EPB2;P10644-2;Q68DQ4;P10644;B2R5T5	cAMP-dependent protein kinase type I-alpha regulatory subunit;cAMP-dependent protein kinase type I-alpha regulatory subunit, N-terminally processed	PRKAR1A;DKFZp779L0468	>tr|K7EM13|K7EM13_HUMAN cAMP-dependent protein kinase type I-alpha regulatory subunit (Fragment) OS=Homo sapiens GN=PRKAR1A PE=1 SV=1;>tr|K7EPB2|K7EPB2_HUMAN cAMP-dependent protein kinase type I-alpha regulatory subunit (Fragment) OS=Homo sapiens GN=PRKAR1	0.93821	6	0.82559	0.93821	1.6797	1.21125		1.06586		0.595344	+	1	1.06586
Q6IQ49-3;Q6IQ49-2;Q6IQ49	Protein SDE2 homolog	SDE2	>sp|Q6IQ49-3|SDE2_HUMAN Isoform 3 of Protein SDE2 homolog OS=Homo sapiens GN=SDE2;>sp|Q6IQ49-2|SDE2_HUMAN Isoform 2 of Protein SDE2 homolog OS=Homo sapiens GN=SDE2;>sp|Q6IQ49|SDE2_HUMAN Protein SDE2 homolog OS=Homo sapiens GN=SDE2 PE=1 SV=1	0.94002	4	0.76244	0.74963	NaN	1.31158		1.33399	+	NaN		1	1.32279
Q9BXW7-2;Q9BXW7;A8MYZ9;B3KVW8	Cat eye syndrome critical region protein 5	CECR5	>sp|Q9BXW7-2|CECR5_HUMAN Isoform 1 of Cat eye syndrome critical region protein 5 OS=Homo sapiens GN=CECR5;>sp|Q9BXW7|CECR5_HUMAN Cat eye syndrome critical region protein 5 OS=Homo sapiens GN=CECR5 PE=1 SV=1	0.94174	13	0.64249	0.97019	0.89714	1.55644	+	1.03073		1.11465		1	1.11465
E9PAM4;B4DEP8;Q9BTU6	Phosphatidylinositol 4-kinase type 2-alpha	PI4K2A	>tr|E9PAM4|E9PAM4_HUMAN Phosphatidylinositol 4-kinase type 2-alpha OS=Homo sapiens GN=PI4K2A PE=1 SV=1;>tr|B4DEP8|B4DEP8_HUMAN cDNA FLJ56960, highly similar to Homo sapiens phosphatidylinositol 4-kinase type II (PI4KII), mRNA OS=Homo sapiens PE=2 SV=1;>sp|	0.94269	4	0.57268	NaN	NaN	1.74618	+	NaN		NaN		1	1.74618
P28288-2;F5GYC1;P28288;E7EUE1;B4DL07;B4DZ22;P28288-3	ATP-binding cassette sub-family D member 3	ABCD3	>sp|P28288-2|ABCD3_HUMAN Isoform 2 of ATP-binding cassette sub-family D member 3 OS=Homo sapiens GN=ABCD3;>tr|F5GYC1|F5GYC1_HUMAN ATP-binding cassette sub-family D member 3 OS=Homo sapiens GN=ABCD3 PE=1 SV=1;>sp|P28288|ABCD3_HUMAN ATP-binding cassette sub-	0.94282	12	0.94935	1.0849	0.59599	1.05335		0.921744		1.67788	+	1	1.05335
Q53TH5;O43929-2;Q96B14;O43929-3;O43929;CON__Q2YDI2;A8K7H4;B7Z632;B7Z2M4	Origin recognition complex subunit 4	ORC4L;ORC4	>tr|Q53TH5|Q53TH5_HUMAN Putative uncharacterized protein ORC4L (Fragment) OS=Homo sapiens GN=ORC4L PE=4 SV=1;>sp|O43929-2|ORC4_HUMAN Isoform 2 of Origin recognition complex subunit 4 OS=Homo sapiens GN=ORC4;>tr|Q96B14|Q96B14_HUMAN Putative uncharacterized	0.94295	3	NaN	0.73366	0.9395	NaN		1.36303	+	1.0644		1	1.21371
Q14847;A8K1D2;A0A024R1S8;C9J9W2;Q14847-3;Q14847-2;B4DIC4;Q9NPR7;B4DJI4;F6S2S5;J3KSN1	LIM and SH3 domain protein 1	LASP1	>sp|Q14847|LASP1_HUMAN LIM and SH3 domain protein 1 OS=Homo sapiens GN=LASP1 PE=1 SV=2;>tr|A8K1D2|A8K1D2_HUMAN cDNA FLJ76601, highly similar to Homo sapiens LIM and SH3 protein 1 (LASP1), mRNA OS=Homo sapiens PE=2 SV=1;>tr|A0A024R1S8|A0A024R1S8_HUMAN LIM a	0.94371	5	1.3766	0.94371	NaN	0.726427	+	1.05965		NaN		1	0.893037
D3DVR8;P42858;Q59FF4	Huntingtin	HD;HTT	>tr|D3DVR8|D3DVR8_HUMAN Huntingtin (Huntington disease), isoform CRA_a OS=Homo sapiens GN=HD PE=4 SV=1;>sp|P42858|HD_HUMAN Huntingtin OS=Homo sapiens GN=HTT PE=1 SV=2	0.9439	3	NaN	1.0296	1.8056	NaN		0.971251		0.553833	+	1	0.762542
Q9NUJ3;B3KQZ4;E9PJ55;R4GNF5;E9PP52	T-complex protein 11-like protein 1	TCP11L1	>sp|Q9NUJ3|T11L1_HUMAN T-complex protein 11-like protein 1 OS=Homo sapiens GN=TCP11L1 PE=1 SV=1;>tr|B3KQZ4|B3KQZ4_HUMAN cDNA FLJ33327 fis, clone BNGH42009025, weakly similar to Homo sapiens t-complex 11(TCP11), mRNA OS=Homo sapiens PE=2 SV=1;>tr|E9PJ55|E9P	0.94506	5	0.81924	0.51999	NaN	1.22064		1.92311	+	NaN		1	1.57188
Q9H3P2-7;B3KSP0;B3KTK5;Q9H3P2;H0Y3X6;H7C2C7;Q53GS8;B3KM78	Negative elongation factor A	NELFA;WHSC2	>sp|Q9H3P2-7|NELFA_HUMAN Isoform 2 of Negative elongation factor A OS=Homo sapiens GN=NELFA;>tr|B3KSP0|B3KSP0_HUMAN Negative elongation factor A OS=Homo sapiens GN=WHSC2 PE=1 SV=1;>tr|B3KTK5|B3KTK5_HUMAN cDNA FLJ38418 fis, clone FEBRA2009780, highly simila	0.95243	4	0.72824	NaN	0.94381	1.37317	+	NaN		1.05954		1	1.21635
F5GZN7;B4DS93;Q86V97	Kelch repeat and BTB domain-containing protein 6	KBTBD6	>tr|F5GZN7|F5GZN7_HUMAN Kelch repeat and BTB domain-containing protein 6 OS=Homo sapiens GN=KBTBD6 PE=4 SV=1;>tr|B4DS93|B4DS93_HUMAN cDNA FLJ58260, highly similar to Kelch repeat and BTB domain-containing protein 6 OS=Homo sapiens PE=2 SV=1;>sp|Q86V97|KBTB	0.95263	4	NaN	NaN	0.6111	NaN		NaN		1.63639	+	1	1.63639
Q12923-2;Q59H55;Q12923-3;Q12923;Q12923-4;Q4W5F5	Tyrosine-protein phosphatase non-receptor type 13	PTPN13	>sp|Q12923-2|PTN13_HUMAN Isoform 2 of Tyrosine-protein phosphatase non-receptor type 13 OS=Homo sapiens GN=PTPN13;>tr|Q59H55|Q59H55_HUMAN Protein tyrosine phosphatase, non-receptor type 13 isoform 2 variant (Fragment) OS=Homo sapiens PE=2 SV=1;>sp|Q12923-3	0.95525	5	NaN	1.3843	NaN	NaN		0.722387	+	NaN		1	0.722387
F5GX77;Q9UI30;A0A024R565;F5GYQ2;Q9UI30-2;M0R242	tRNA methyltransferase 112 homolog	TRMT112	>tr|F5GX77|F5GX77_HUMAN tRNA methyltransferase 112 homolog OS=Homo sapiens GN=TRMT112 PE=1 SV=1;>sp|Q9UI30|TR112_HUMAN tRNA methyltransferase 112 homolog OS=Homo sapiens GN=TRMT112 PE=1 SV=1;>tr|A0A024R565|A0A024R565_HUMAN Uncharacterized protein OS=Homo s	0.95544	5	0.88112	0.75887	0.90392	1.13492		1.31775	+	1.10629		1	1.13492
Q9ULC4;Q9ULC4-3;Q9ULC4-2	Malignant T-cell-amplified sequence 1	MCTS1	>sp|Q9ULC4|MCTS1_HUMAN Malignant T-cell-amplified sequence 1 OS=Homo sapiens GN=MCTS1 PE=1 SV=1;>sp|Q9ULC4-3|MCTS1_HUMAN Isoform 3 of Malignant T-cell-amplified sequence 1 OS=Homo sapiens GN=MCTS1;>sp|Q9ULC4-2|MCTS1_HUMAN Isoform 2 of Malignant T-cell-ampl	0.95561	10	0.91156	3.0554	0.95938	1.09702		0.327289	+	1.04234		1	1.04234
P49427;A0A024R1Z1;U3KQP9;U3KQ77;U3KPV8;U3KQB6	Ubiquitin-conjugating enzyme E2 R1	CDC34	>sp|P49427|UB2R1_HUMAN Ubiquitin-conjugating enzyme E2 R1 OS=Homo sapiens GN=CDC34 PE=1 SV=2;>tr|A0A024R1Z1|A0A024R1Z1_HUMAN Cell division cycle 34, isoform CRA_a OS=Homo sapiens GN=CDC34 PE=3 SV=1;>tr|U3KQP9|U3KQP9_HUMAN Ubiquitin-conjugating enzyme E2 R1	0.9579	8	0.68922	1.0504	0.92162	1.45092	+	0.952018		1.08505		1	1.08505
Q9NWH9;A0A024R5X3;A0A024R5U7;A8K5V8;H7C3F4;H7BXE3;H0YKH2;H0YMM0;H0YL55;H0YMW8;H0YNF3;H0YMR6;H0YLE6;H0YKU6	SAFB-like transcription modulator	SLTM	>sp|Q9NWH9|SLTM_HUMAN SAFB-like transcription modulator OS=Homo sapiens GN=SLTM PE=1 SV=2;>tr|A0A024R5X3|A0A024R5X3_HUMAN SAFB-like, transcription modulator, isoform CRA_b OS=Homo sapiens GN=SLTM PE=4 SV=1;>tr|A0A024R5U7|A0A024R5U7_HUMAN SAFB-like, transcr	0.96005	7	0.9137	1.0341	0.75092	1.09445		0.967024		1.3317	+	1	1.09445
Q8IZH2-2;Q8IZH2;B3KW17;H7C5E4;B4E2K3;Q8IZH2-3	5-3 exoribonuclease 1	XRN1	>sp|Q8IZH2-2|XRN1_HUMAN Isoform 2 of 5-3 exoribonuclease 1 OS=Homo sapiens GN=XRN1;>sp|Q8IZH2|XRN1_HUMAN 5-3 exoribonuclease 1 OS=Homo sapiens GN=XRN1 PE=1 SV=1;>tr|B3KW17|B3KW17_HUMAN cDNA FLJ41903 fis, clone PEBLM2005183, highly similar to 5-3 exor	0.96064	3	0.60153	1.0465	0.75372	1.66243	+	0.955566		1.32675		1	1.32675
Q12972-2;Q38J66;Q561W4;Q12972	Nuclear inhibitor of protein phosphatase 1;Activator of RNA decay	PPP1R8	>sp|Q12972-2|PP1R8_HUMAN Isoform Beta of Nuclear inhibitor of protein phosphatase 1 OS=Homo sapiens GN=PPP1R8;>tr|Q38J66|Q38J66_HUMAN Protein phosphatase 1 regulatory subunit 8 testis splice variant (Fragment) OS=Homo sapiens GN=PPP1R8 PE=2 SV=1;>tr|Q561W4	0.96136	5	0.66902	0.84557	NaN	1.49472	+	1.18263		NaN		1	1.33868
Q6Y7W6-4;Q6Y7W6-5;A0A024R4A5;Q6Y7W6;I1E4Y6;C9JHW1;B4DRT8;E7ESB6;E9PC50;B4DZM1;Q6Y7W6-3;F8WCD5;C9JPV7;C9JXQ0;C9J0V6;C9JHT0;C9JRZ2;B4DLU7;C9J7G1;B8ZZD2	PERQ amino acid-rich with GYF domain-containing protein 2	GIGYF2	>sp|Q6Y7W6-4|PERQ2_HUMAN Isoform 3 of PERQ amino acid-rich with GYF domain-containing protein 2 OS=Homo sapiens GN=GIGYF2;>sp|Q6Y7W6-5|PERQ2_HUMAN Isoform 4 of PERQ amino acid-rich with GYF domain-containing protein 2 OS=Homo sapiens GN=GIGYF2;>tr|A0A024R4	0.96222	5	0.69077	1.1202	NaN	1.44766	+	0.892698		NaN		1	1.17018
D3DSR2;P05423;E5RHT4	DNA-directed RNA polymerase III subunit RPC4	POLR3D	>tr|D3DSR2|D3DSR2_HUMAN Polymerase (RNA) III (DNA directed) polypeptide D, 44kDa, isoform CRA_a OS=Homo sapiens GN=POLR3D PE=4 SV=1;>sp|P05423|RPC4_HUMAN DNA-directed RNA polymerase III subunit RPC4 OS=Homo sapiens GN=POLR3D PE=1 SV=2;>tr|E5RHT4|E5RHT4_HUM	0.96325	5	NaN	0.9621	0.72563	NaN		1.03939		1.37811	+	1	1.20875
Q6UXN9;A0A024R333	WD repeat-containing protein 82	WDR82	>sp|Q6UXN9|WDR82_HUMAN WD repeat-containing protein 82 OS=Homo sapiens GN=WDR82 PE=1 SV=1;>tr|A0A024R333|A0A024R333_HUMAN Transmembrane protein 113, isoform CRA_a OS=Homo sapiens GN=TMEM113 PE=4 SV=1	0.9636	5	0.93903	1.0502	1.5947	1.06493		0.9522		0.627077	+	1	0.9522
Q9NSK0;A0A024RCZ8;Q9NSK0-3;B4DME9;C9J8T5;Q9NSK0-4;C9JZE5;H7C4M1;C9JXT5;C9JQU1;C9K0D5;Q9NSK0-2;K7EL76;Q6P597-2;Q6P597;A0A024R0V3;Q6P597-3	Kinesin light chain 4	KLC4	>sp|Q9NSK0|KLC4_HUMAN Kinesin light chain 4 OS=Homo sapiens GN=KLC4 PE=1 SV=3;>tr|A0A024RCZ8|A0A024RCZ8_HUMAN Kinesin light chain 4, isoform CRA_a OS=Homo sapiens GN=KLC4 PE=4 SV=1;>sp|Q9NSK0-3|KLC4_HUMAN Isoform 3 of Kinesin light chain 4 OS=Homo sapiens	0.9637	4	NaN	0.96994	0.57254	NaN		1.03099		1.7466	+	1	1.3888
A1L020	RNA-binding protein MEX3A	MEX3A	>sp|A1L020|MEX3A_HUMAN RNA-binding protein MEX3A OS=Homo sapiens GN=MEX3A PE=1 SV=1	0.96375	3	NaN	1.9197	NaN	NaN		0.520915	+	NaN		1	0.520915
Q53FK2;P48723;F5GWS8;B4DQX6;B3KY30	Heat shock 70 kDa protein 13	HSPA13	>tr|Q53FK2|Q53FK2_HUMAN Stress 70 protein chaperone, microsome-associated, 60kDa variant (Fragment) OS=Homo sapiens PE=2 SV=1;>sp|P48723|HSP13_HUMAN Heat shock 70 kDa protein 13 OS=Homo sapiens GN=HSPA13 PE=1 SV=1;>tr|F5GWS8|F5GWS8_HUMAN Heat shock 70 kDa	0.96686	5	0.68486	NaN	1.1787	1.46015	+	NaN		0.848392		1	1.15427
Q9UK59;F8WAY1;F5GWV2;B3KSR5;Q9UK59-2	Lariat debranching enzyme	DBR1	>sp|Q9UK59|DBR1_HUMAN Lariat debranching enzyme OS=Homo sapiens GN=DBR1 PE=1 SV=2;>tr|F8WAY1|F8WAY1_HUMAN Lariat debranching enzyme OS=Homo sapiens GN=DBR1 PE=1 SV=1	0.96695	6	0.99401	1.5569	1.0232	1.00603		0.642302	+	0.977326		1	0.977326
P11171-4;Q4VB86;P11171-3;Q1WWM3;P11171-2;P11171;P11171-6;Q4VB87;P11171-5;Q59F12;Q29RX4;P11171-7;E9PEW9;B7Z627;B7Z5L2	Protein 4.1	EPB41	>sp|P11171-4|41_HUMAN Isoform 4 of Protein 4.1 OS=Homo sapiens GN=EPB41;>tr|Q4VB86|Q4VB86_HUMAN EPB41 protein OS=Homo sapiens GN=EPB41 PE=2 SV=2;>sp|P11171-3|41_HUMAN Isoform 3 of Protein 4.1 OS=Homo sapiens GN=EPB41;>tr|Q1WWM3|Q1WWM3_HUMAN EPB41 protein (	0.96699	7	2.1561	1.0181	0.96699	0.4638	+	0.982222		1.03414		1	0.982222
A6NL93;P05114;Q6NSG7;Q3B790;A6NEL0;D3DWY4;A0A024R2A3;F2Z2W6;F2Z2Y5;H7BXJ5	Non-histone chromosomal protein HMG-14	HMGN1	>tr|A6NL93|A6NL93_HUMAN Non-histone chromosomal protein HMG-14 OS=Homo sapiens GN=HMGN1 PE=1 SV=1;>sp|P05114|HMGN1_HUMAN Non-histone chromosomal protein HMG-14 OS=Homo sapiens GN=HMGN1 PE=1 SV=3;>tr|Q6NSG7|Q6NSG7_HUMAN High-mobility group nucleosome bindin	0.96711	6	0.89636	0.33103	NaN	1.11562		3.02087	+	NaN		1	2.06825
O95456-2;O95456;B2RD51;F8WBH7	Proteasome assembly chaperone 1	PSMG1	>sp|O95456-2|PSMG1_HUMAN Isoform 2 of Proteasome assembly chaperone 1 OS=Homo sapiens GN=PSMG1;>sp|O95456|PSMG1_HUMAN Proteasome assembly chaperone 1 OS=Homo sapiens GN=PSMG1 PE=1 SV=1;>tr|B2RD51|B2RD51_HUMAN cDNA, FLJ96455, highly similar to Homo sapiens	0.96747	6	0.71323	1.0679	NaN	1.40207	+	0.936417		NaN		1	1.16924
B4DVB5;B4DW57;Q06587;Q06587-2;A0A024RCR9;B4DMN3	E3 ubiquitin-protein ligase RING1	RING1	>tr|B4DVB5|B4DVB5_HUMAN cDNA FLJ56724, highly similar to Polycomb complex protein RING1 OS=Homo sapiens PE=2 SV=1;>tr|B4DW57|B4DW57_HUMAN cDNA FLJ51343, highly similar to Polycomb complex protein RING1 OS=Homo sapiens PE=2 SV=1;>sp|Q06587|RING1_HUMAN E3 ub	0.96809	5	0.71678	1.0197	0.90518	1.39513	+	0.980681		1.10475		1	1.10475
Q96JG6-3;A7MD03;Q96JG6;Q96JG6-2;Q9NXR2;Q75N11;H0Y7Q2;Q5JPD9;B4DS55;D6W5Q7	Coiled-coil domain-containing protein 132	CCDC132;FLJ20097;DKFZp313I2429	>sp|Q96JG6-3|CC132_HUMAN Isoform 3 of Coiled-coil domain-containing protein 132 OS=Homo sapiens GN=CCDC132;>tr|A7MD03|A7MD03_HUMAN CCDC132 protein OS=Homo sapiens GN=CCDC132 PE=2 SV=1;>sp|Q96JG6|CC132_HUMAN Coiled-coil domain-containing protein 132 OS=Homo	0.97089	4	NaN	NaN	0.60982	NaN		NaN		1.63983	+	1	1.63983
Q96E11-8;Q96E11-3;Q96E11;A0A024R850;Q96E11-7;X6RDS5;Q96E11-5;Q96E11-6;A0A024R855;Q96E11-4;Q96E11-2	Ribosome-recycling factor, mitochondrial	MRRF	>sp|Q96E11-8|RRFM_HUMAN Isoform 8 of Ribosome-recycling factor, mitochondrial OS=Homo sapiens GN=MRRF;>sp|Q96E11-3|RRFM_HUMAN Isoform 3 of Ribosome-recycling factor, mitochondrial OS=Homo sapiens GN=MRRF;>sp|Q96E11|RRFM_HUMAN Ribosome-recycling factor, mit	0.97141	4	1.0102	1.037	0.65904	0.989903		0.96432		1.51736	+	1	0.989903
Q496I0;P14406;D6RIE3;D6RGV5;H0UI06;D6R9C3	Cytochrome c oxidase subunit 7A2, mitochondrial	COX7A2	>tr|Q496I0|Q496I0_HUMAN COX7A2 protein OS=Homo sapiens GN=COX7A2 PE=2 SV=1;>sp|P14406|CX7A2_HUMAN Cytochrome c oxidase subunit 7A2, mitochondrial OS=Homo sapiens GN=COX7A2 PE=1 SV=1;>tr|D6RIE3|D6RIE3_HUMAN Uncharacterized protein OS=Homo sapiens GN=COX7A2	0.97246	5	0.99701	0.9452	0.29327	1.003		1.05798		3.40983	+	1	1.05798
B4DZV7;Q9H871	Protein RMD5 homolog A	RMND5A	>tr|B4DZV7|B4DZV7_HUMAN cDNA FLJ54209 OS=Homo sapiens PE=2 SV=1;>sp|Q9H871|RMD5A_HUMAN Protein RMD5 homolog A OS=Homo sapiens GN=RMND5A PE=1 SV=1	0.9727	4	NaN	0.9357	1.6131	NaN		1.06872		0.619924	+	1	0.844321
P16152;P16152-2;E9PQ63;A8MTM1	Carbonyl reductase [NADPH] 1	CBR1	>sp|P16152|CBR1_HUMAN Carbonyl reductase [NADPH] 1 OS=Homo sapiens GN=CBR1 PE=1 SV=3;>sp|P16152-2|CBR1_HUMAN Isoform 2 of Carbonyl reductase [NADPH] 1 OS=Homo sapiens GN=CBR1;>tr|E9PQ63|E9PQ63_HUMAN Carbonyl reductase [NADPH] 1 OS=Homo sapiens GN=CBR1 PE=1	0.97377	35	1.0548	0.90232	0.72637	0.948047		1.10825		1.37671	+	1	1.10825
P10253;A0A024R8Q1;B7Z5V6	Lysosomal alpha-glucosidase;76 kDa lysosomal alpha-glucosidase;70 kDa lysosomal alpha-glucosidase	GAA	>sp|P10253|LYAG_HUMAN Lysosomal alpha-glucosidase OS=Homo sapiens GN=GAA PE=1 SV=4;>tr|A0A024R8Q1|A0A024R8Q1_HUMAN Glucosidase, alpha acid (Pompe disease, glycogen storage disease type II), isoform CRA_a OS=Homo sapiens GN=GAA PE=4 SV=1	0.97632	4	1.0145	0.74105	0.9361	0.985707		1.34944	+	1.06826		1	1.06826
Q9Y276;Q53EX1;A8JZZ8;A0A024R467;C9J1S9;Q53RT4;H7BZF6;H7C492;C9J8G3	Mitochondrial chaperone BCS1	BCS1L	>sp|Q9Y276|BCS1_HUMAN Mitochondrial chaperone BCS1 OS=Homo sapiens GN=BCS1L PE=1 SV=1;>tr|Q53EX1|Q53EX1_HUMAN BCS1-like variant (Fragment) OS=Homo sapiens PE=2 SV=1;>tr|A8JZZ8|A8JZZ8_HUMAN cDNA FLJ77826, highly similar to Homo sapiens BCS1-like (yeast), mR	0.97661	8	1.1275	0.95027	0.6723	0.886918		1.05233		1.48743	+	1	1.05233
Q96JP5-2;A0A024R4Z4;Q96JP5;A0A024R4Z1;H3BTR0;A0A024R557	E3 ubiquitin-protein ligase ZFP91	ZFP91;ZFP91-CNTF	>sp|Q96JP5-2|ZFP91_HUMAN Isoform 2 of E3 ubiquitin-protein ligase ZFP91 OS=Homo sapiens GN=ZFP91;>tr|A0A024R4Z4|A0A024R4Z4_HUMAN HCG2039447, isoform CRA_d OS=Homo sapiens GN=hCG_2039447 PE=4 SV=1;>sp|Q96JP5|ZFP91_HUMAN E3 ubiquitin-protein ligase ZFP91 OS=	0.97682	4	NaN	NaN	0.33707	NaN		NaN		2.96674	+	1	2.96674
F5H0P4;F5GY90;P08397-4;P08397-3;F5H345;P08397-2;P08397	Porphobilinogen deaminase	HMBS	>tr|F5H0P4|F5H0P4_HUMAN Porphobilinogen deaminase (Fragment) OS=Homo sapiens GN=HMBS PE=1 SV=1;>tr|F5GY90|F5GY90_HUMAN Porphobilinogen deaminase (Fragment) OS=Homo sapiens GN=HMBS PE=1 SV=1;>sp|P08397-4|HEM3_HUMAN Isoform 4 of Porphobilinogen deaminase OS=	0.97883	6	0.7041	1.0019	NaN	1.42025	+	0.998104		NaN		1	1.20918
K7EKE8;Q9UEI6;Q92692-2;Q92692;Q7Z457	Poliovirus receptor-related protein 2	PVRL2	>tr|K7EKE8|K7EKE8_HUMAN Nectin-2 (Fragment) OS=Homo sapiens GN=PVRL2 PE=4 SV=1;>tr|Q9UEI6|Q9UEI6_HUMAN Polio virus related protein 2, alpha isoform (Fragment) OS=Homo sapiens PE=4 SV=1;>sp|Q92692-2|PVRL2_HUMAN Isoform Alpha of Nectin-2 OS=Homo sapiens GN=P	0.98277	3	1.1298	1.0955	2.4698	0.885112		0.912825		0.404891	+	1	0.885112
Q53XJ5;P26885;F5H0N4	Peptidyl-prolyl cis-trans isomerase;Peptidyl-prolyl cis-trans isomerase FKBP2	FKBP2	>tr|Q53XJ5|Q53XJ5_HUMAN Peptidyl-prolyl cis-trans isomerase OS=Homo sapiens GN=FKBP2 PE=2 SV=1;>sp|P26885|FKBP2_HUMAN Peptidyl-prolyl cis-trans isomerase FKBP2 OS=Homo sapiens GN=FKBP2 PE=1 SV=2;>tr|F5H0N4|F5H0N4_HUMAN Peptidyl-prolyl cis-trans isomerase (	0.98442	6	0.72833	0.95276	0.99544	1.373	+	1.04958		1.00458		1	1.04958
Q06323-3;Q06323;Q06323-2;Q6FHU3;Q86SZ9;H0YKK6;H0YLU2	Proteasome activator complex subunit 1	PSME1	>sp|Q06323-3|PSME1_HUMAN Isoform 3 of Proteasome activator complex subunit 1 OS=Homo sapiens GN=PSME1;>sp|Q06323|PSME1_HUMAN Proteasome activator complex subunit 1 OS=Homo sapiens GN=PSME1 PE=1 SV=1;>sp|Q06323-2|PSME1_HUMAN Isoform 2 of Proteasome activato	0.98471	12	0.51164	1.0199	1.166	1.9545	+	0.980488		0.857633		1	0.980488
Q96T37-4;Q96T37-2;Q96T37-3;Q96T37	Putative RNA-binding protein 15	RBM15	>sp|Q96T37-4|RBM15_HUMAN Isoform 4 of Putative RNA-binding protein 15 OS=Homo sapiens GN=RBM15;>sp|Q96T37-2|RBM15_HUMAN Isoform 2 of Putative RNA-binding protein 15 OS=Homo sapiens GN=RBM15;>sp|Q96T37-3|RBM15_HUMAN Isoform 3 of Putative RNA-binding protein	0.98471	3	1.6533	0.84862	0.77638	0.604851	+	1.17838		1.28803		1	1.17838
F8W9B8;B4E0U7;B4DHG4;Q8IW24;O00471;Q658M3	Exocyst complex component 5	EXOC5	>tr|F8W9B8|F8W9B8_HUMAN Exocyst complex component 5 OS=Homo sapiens GN=EXOC5 PE=1 SV=1;>tr|B4E0U7|B4E0U7_HUMAN cDNA FLJ54264, highly similar to Exocyst complex component 5 OS=Homo sapiens PE=2 SV=1;>tr|B4DHG4|B4DHG4_HUMAN cDNA FLJ54619, highly similar to E	0.98521	3	1.5842	NaN	NaN	0.631233	+	NaN		NaN		1	0.631233
Q9Y4C2-2;Q9Y4C2;B4DST7;B7Z246	Protein FAM115A	FAM115A	>sp|Q9Y4C2-2|F115A_HUMAN Isoform 2 of Protein FAM115A OS=Homo sapiens GN=FAM115A;>sp|Q9Y4C2|F115A_HUMAN Protein FAM115A OS=Homo sapiens GN=FAM115A PE=1 SV=3;>tr|B4DST7|B4DST7_HUMAN cDNA FLJ58406, weakly similar to Mus musculus experimental autoimmune prost	0.9879	4	1.5412	0.92583	NaN	0.648845	+	1.08011		NaN		1	0.864478
U3KQ85;Q99622;F5GXW5;U3KQ07	Protein C10	C12orf57	>tr|U3KQ85|U3KQ85_HUMAN Protein C10 OS=Homo sapiens GN=C12orf57 PE=1 SV=1;>sp|Q99622|C10_HUMAN Protein C10 OS=Homo sapiens GN=C12orf57 PE=1 SV=1;>tr|F5GXW5|F5GXW5_HUMAN Protein C10 OS=Homo sapiens GN=C12orf57 PE=1 SV=1	0.98831	4	1.0719	0.91638	1.4369	0.932923		1.09125		0.695943	+	1	0.932923
O95219;F8W9T3;B4DQV4;F8WDD4;Q9H398	Sorting nexin-4	SNX4	>sp|O95219|SNX4_HUMAN Sorting nexin-4 OS=Homo sapiens GN=SNX4 PE=1 SV=1;>tr|F8W9T3|F8W9T3_HUMAN Sorting nexin-4 (Fragment) OS=Homo sapiens GN=SNX4 PE=1 SV=1;>tr|B4DQV4|B4DQV4_HUMAN Sorting nexin-4 OS=Homo sapiens GN=SNX4 PE=1 SV=1	0.9898	3	1.0066	1.4062	1.3386	0.993443		0.711136	+	0.747049		1	0.747049
Q9NPK3;Q96BC0;Q15477;O76046;A0A024RCU1;B4DM01;B4DSY1;F5H7B0;B4E0N1;Q59F56;B4DF09;B4E0B4;H7C5N0;F8WDE8	Helicase SKI2W	SKIV2L;SKI2W	>tr|Q9NPK3|Q9NPK3_HUMAN DJ34F7.7 (Superkiller viralicidic activity 2 (S. cerevisiae homolog)-like (SKI2W)) OS=Homo sapiens GN=SKIV2L PE=4 SV=1;>tr|Q96BC0|Q96BC0_HUMAN Superkiller viralicidic activity 2-like (S. cerevisiae) OS=Homo sapiens GN=SKIV2L PE=2 SV	0.9904	9	1.0395	0.97943	1.6287	0.962001		1.021		0.613987	+	1	0.962001
A2RRP1-2;A2RRP1;H0Y5G7;G1UI26;H7C1Y9;H7BZR3	Neuroblastoma-amplified sequence	NBAS	>sp|A2RRP1-2|NBAS_HUMAN Isoform 2 of Neuroblastoma-amplified sequence OS=Homo sapiens GN=NBAS;>sp|A2RRP1|NBAS_HUMAN Neuroblastoma-amplified sequence OS=Homo sapiens GN=NBAS PE=1 SV=2;>tr|H0Y5G7|H0Y5G7_HUMAN Neuroblastoma-amplified sequence (Fragment) OS=Ho	0.99041	3	0.72458	0.97722	NaN	1.38011	+	1.02331		NaN		1	1.20171
P55001-3;P55001-2;P55001;A0A024RA94	Microfibrillar-associated protein 2	MFAP2	>sp|P55001-3|MFAP2_HUMAN Isoform B of Microfibrillar-associated protein 2 OS=Homo sapiens GN=MFAP2;>sp|P55001-2|MFAP2_HUMAN Isoform A of Microfibrillar-associated protein 2 OS=Homo sapiens GN=MFAP2;>sp|P55001|MFAP2_HUMAN Microfibrillar-associated protein	0.99085	4	0.74127	NaN	0.99857	1.34904	+	NaN		1.00143		1	1.17523
B4DHC5;A0A024R458;P52594-2;P52594-3;P52594;P52594-4;C9J2I0;B8ZZY2	Arf-GAP domain and FG repeat-containing protein 1	AGFG1	>tr|B4DHC5|B4DHC5_HUMAN cDNA FLJ57927, highly similar to Nucleoporin-like protein RIP OS=Homo sapiens PE=2 SV=1;>tr|A0A024R458|A0A024R458_HUMAN HIV-1 Rev binding protein, isoform CRA_a OS=Homo sapiens GN=HRB PE=4 SV=1;>sp|P52594-2|AGFG1_HUMAN Isoform 2 of	0.99111	3	NaN	0.75894	0.87044	NaN		1.31763	+	1.14884		1	1.23324
P22570-4;P22570-6;P22570-5;B4DDI9;Q6GSK2;P22570;P22570-2;P22570-7;P22570-3;G3V0F2;B3KSQ6;J3QQX3	NADPH:adrenodoxin oxidoreductase, mitochondrial	FDXR	>sp|P22570-4|ADRO_HUMAN Isoform 4 of NADPH:adrenodoxin oxidoreductase, mitochondrial OS=Homo sapiens GN=FDXR;>sp|P22570-6|ADRO_HUMAN Isoform 6 of NADPH:adrenodoxin oxidoreductase, mitochondrial OS=Homo sapiens GN=FDXR;>sp|P22570-5|ADRO_HUMAN Isoform 5 of N	0.99204	3	3.1242	NaN	NaN	0.320082	+	NaN		NaN		1	0.320082
B3KXK5;Q9ULH7-4;Q9ULH7;Q9ULH7-5	MKL/myocardin-like protein 2	MKL2	>tr|B3KXK5|B3KXK5_HUMAN cDNA FLJ45623 fis, clone BRTHA3027957, highly similar to MKL/myocardin-like protein 2 OS=Homo sapiens PE=2 SV=1;>sp|Q9ULH7-4|MKL2_HUMAN Isoform 4 of MKL/myocardin-like protein 2 OS=Homo sapiens GN=MKL2;>sp|Q9ULH7|MKL2_HUMAN MKL/myoc	0.99233	4	0.61973	0.93772	0.99233	1.61361	+	1.06642		1.00773		1	1.06642
Q9BTV4;A0A024R2F9;Q8TEP9	Transmembrane protein 43	TMEM43;FLJ00144	>sp|Q9BTV4|TMM43_HUMAN Transmembrane protein 43 OS=Homo sapiens GN=TMEM43 PE=1 SV=1;>tr|A0A024R2F9|A0A024R2F9_HUMAN Transmembrane protein 43, isoform CRA_a OS=Homo sapiens GN=TMEM43 PE=4 SV=1;>tr|Q8TEP9|Q8TEP9_HUMAN FLJ00144 protein (Fragment) OS=Homo sapi	0.99368	3	NaN	1.4516	0.99508	NaN		0.688895	+	1.00494		1	0.84692
P30085;B2R6S5;B4DDL4;P30085-2;Q5T0D2;B4DFW6	UMP-CMP kinase	CMPK1;CMPK	>sp|P30085|KCY_HUMAN UMP-CMP kinase OS=Homo sapiens GN=CMPK1 PE=1 SV=3;>tr|B2R6S5|B2R6S5_HUMAN UMP-CMP kinase OS=Homo sapiens GN=CMPK PE=2 SV=1;>tr|B4DDL4|B4DDL4_HUMAN cDNA FLJ53966, moderately similar to Homo sapiens cytidylate kinase (CMPK), mRNA OS=Homo	0.99555	27	1.0574	0.75678	1.0069	0.945716		1.32139	+	0.993147		1	0.993147
G3V3Q0;G3V5F9;G3V5B8;G3V554;G3V4W8;G3V2J6;G3V5H9;G3V2U6;Q9BRS7;G3V2F4;Q32Q25;E7EPD8;Q9NUW8;B2RDI0;A0A024R6L5	Tyrosyl-DNA phosphodiesterase 1	TDP1	>tr|G3V3Q0|G3V3Q0_HUMAN Tyrosyl-DNA phosphodiesterase 1 (Fragment) OS=Homo sapiens GN=TDP1 PE=1 SV=1;>tr|G3V5F9|G3V5F9_HUMAN Tyrosyl-DNA phosphodiesterase 1 (Fragment) OS=Homo sapiens GN=TDP1 PE=1 SV=2;>tr|G3V5B8|G3V5B8_HUMAN Tyrosyl-DNA phosphodiesterase	0.99564	3	0.68262	NaN	NaN	1.46494	+	NaN		NaN		1	1.46494
P62917;E9PKZ0;G3V1A1;B4DVG7;E9PKU4;E9PP36	60S ribosomal protein L8	RPL8	>sp|P62917|RL8_HUMAN 60S ribosomal protein L8 OS=Homo sapiens GN=RPL8 PE=1 SV=2;>tr|E9PKZ0|E9PKZ0_HUMAN 60S ribosomal protein L8 (Fragment) OS=Homo sapiens GN=RPL8 PE=1 SV=1;>tr|G3V1A1|G3V1A1_HUMAN 60S ribosomal protein L8 OS=Homo sapiens GN=RPL8 PE=1 SV=1	0.99628	21	1.0104	1.0105	0.20557	0.989707		0.989609		4.86452	+	1	0.989707
Q9BYV8-5;Q9BYV8-2;Q9BYV8;F8WF85;C9J6R3;C9J9X8;C9JCX6;C9JXA0	Centrosomal protein of 41 kDa	CEP41	>sp|Q9BYV8-5|CEP41_HUMAN Isoform 5 of Centrosomal protein of 41 kDa OS=Homo sapiens GN=CEP41;>sp|Q9BYV8-2|CEP41_HUMAN Isoform 2 of Centrosomal protein of 41 kDa OS=Homo sapiens GN=CEP41;>sp|Q9BYV8|CEP41_HUMAN Centrosomal protein of 41 kDa OS=Homo sapiens G	0.99685	5	NaN	0.73269	1.019	NaN		1.36483	+	0.981354		1	1.17309
Q5H8A4-5;Q5H8A4-4;E7EM50;D6RFE8;Q8NCI4;E7EWV1;Q5H8A4-2;Q5H8A4;Q5H8A4-6;D6R9J9;Q5H8A4-3	GPI ethanolamine phosphate transferase 2	PIGG	>sp|Q5H8A4-5|PIGG_HUMAN Isoform 5 of GPI ethanolamine phosphate transferase 2 OS=Homo sapiens GN=PIGG;>sp|Q5H8A4-4|PIGG_HUMAN Isoform 4 of GPI ethanolamine phosphate transferase 2 OS=Homo sapiens GN=PIGG;>tr|E7EM50|E7EM50_HUMAN GPI ethanolamine phosphate t	0.99807	5	0.61726	0.87019	1.1205	1.62006	+	1.14917		0.892459		1	1.14917
Q9BX40-2;Q9BX40;Q5TBP9;Q5TBQ1;Q5TBQ0	Protein LSM14 homolog B	LSM14B	>sp|Q9BX40-2|LS14B_HUMAN Isoform 2 of Protein LSM14 homolog B OS=Homo sapiens GN=LSM14B;>sp|Q9BX40|LS14B_HUMAN Protein LSM14 homolog B OS=Homo sapiens GN=LSM14B PE=1 SV=1;>tr|Q5TBP9|Q5TBP9_HUMAN Protein LSM14 homolog B (Fragment) OS=Homo sapiens GN=LSM14B	0.99957	5	0.87827	1.1369	0.47561	1.1386		0.879585		2.10256	+	1	1.1386
Q9NRF8;A0A024RC00	CTP synthase 2	CTPS2	>sp|Q9NRF8|PYRG2_HUMAN CTP synthase 2 OS=Homo sapiens GN=CTPS2 PE=1 SV=1;>tr|A0A024RC00|A0A024RC00_HUMAN CTP synthase OS=Homo sapiens GN=CTPS2 PE=3 SV=1	1.0008	10	0.70369	1.0273	1.0364	1.42108	+	0.973425		0.964878		1	0.973425
F5H4L7;B4DLT1;O75436;G3V1N8;A8K3C1;S4R3Q6;O75436-2	Vacuolar protein sorting-associated protein 26A	VPS26A	>tr|F5H4L7|F5H4L7_HUMAN Vacuolar protein sorting-associated protein 26A OS=Homo sapiens GN=VPS26A PE=1 SV=1;>tr|B4DLT1|B4DLT1_HUMAN cDNA FLJ59716, highly similar to Vacuolar protein sorting 26A OS=Homo sapiens PE=2 SV=1;>sp|O75436|VP26A_HUMAN Vacuolar prot	1.0012	6	1.0316	0.62423	1.0079	0.969368		1.60197	+	0.992162		1	0.992162
P62304;A6NHK2	Small nuclear ribonucleoprotein E	SNRPE	>sp|P62304|RUXE_HUMAN Small nuclear ribonucleoprotein E OS=Homo sapiens GN=SNRPE PE=1 SV=1;>tr|A6NHK2|A6NHK2_HUMAN Small nuclear ribonucleoprotein E OS=Homo sapiens GN=SNRPE PE=1 SV=1	1.0024	7	0.9625	1.3963	1.2682	1.03896		0.716178	+	0.788519		1	0.788519
H0YK59		CD276	>tr|H0YK59|H0YK59_HUMAN CD276 antigen (Fragment) OS=Homo sapiens GN=CD276 PE=1 SV=1	1.0042	3	NaN	1.4682	NaN	NaN		0.681106	+	NaN		1	0.681106
Q8N302;Q6PIK7;A8K029	Angiogenic factor with G patch and FHA domains 1	AGGF1	>sp|Q8N302|AGGF1_HUMAN Angiogenic factor with G patch and FHA domains 1 OS=Homo sapiens GN=AGGF1 PE=1 SV=2;>tr|Q6PIK7|Q6PIK7_HUMAN Angiogenic factor with G patch and FHA domains 1 OS=Homo sapiens GN=AGGF1 PE=2 SV=1;>tr|A8K029|A8K029_HUMAN Angiogenic factor	1.0052	3	NaN	0.70574	NaN	NaN		1.41695	+	NaN		1	1.41695
V9GYP5;Q92979;A8K6D2;B4DQC7;B4DP65	Ribosomal RNA small subunit methyltransferase NEP1	EMG1	>tr|V9GYP5|V9GYP5_HUMAN Ribosomal RNA small subunit methyltransferase NEP1 OS=Homo sapiens GN=EMG1 PE=1 SV=1;>sp|Q92979|NEP1_HUMAN Ribosomal RNA small subunit methyltransferase NEP1 OS=Homo sapiens GN=EMG1 PE=1 SV=4;>tr|A8K6D2|A8K6D2_HUMAN cDNA FLJ76620, h	1.0053	6	0.99841	0.53011	1.0547	1.00159		1.8864	+	0.948137		1	1.00159
B4DV74;Q9BWU0	Kanadaptin	SLC4A1AP	>tr|B4DV74|B4DV74_HUMAN cDNA FLJ53855, highly similar to Kanadaptin OS=Homo sapiens PE=2 SV=1;>sp|Q9BWU0|NADAP_HUMAN Kanadaptin OS=Homo sapiens GN=SLC4A1AP PE=1 SV=1	1.0056	7	1.3953	1.0685	0.99958	0.716692	+	0.935891		1.00042		1	0.935891
Q9H974-2;Q9H974-3;Q9H974;Q9H974-4	Queuine tRNA-ribosyltransferase subunit QTRTD1	QTRTD1	>sp|Q9H974-2|QTRD1_HUMAN Isoform 2 of Queuine tRNA-ribosyltransferase subunit QTRTD1 OS=Homo sapiens GN=QTRTD1;>sp|Q9H974-3|QTRD1_HUMAN Isoform 3 of Queuine tRNA-ribosyltransferase subunit QTRTD1 OS=Homo sapiens GN=QTRTD1;>sp|Q9H974|QTRD1_HUMAN Queuine tRN	1.0062	4	1.6682	0.92746	NaN	0.599449	+	1.07821		NaN		1	0.838831
Q6AI38;Q8IWA4;H7C5H5;Q8IWA4-3;Q4AEJ3;Q4AEJ4;Q05CV7	Mitofusin-1	DKFZp762F247;MFN1;hfzo1;hfzo2	>tr|Q6AI38|Q6AI38_HUMAN Putative uncharacterized protein DKFZp762F247 (Fragment) OS=Homo sapiens GN=DKFZp762F247 PE=2 SV=1;>sp|Q8IWA4|MFN1_HUMAN Mitofusin-1 OS=Homo sapiens GN=MFN1 PE=1 SV=2;>tr|H7C5H5|H7C5H5_HUMAN Mitofusin-1 (Fragment) OS=Homo sapiens GN	1.0078	4	1.0004	1.3833	NaN	0.9996		0.722909	+	NaN		1	0.861255
P60604-2;P60604;Q8NDD5	Ubiquitin-conjugating enzyme E2 G2	UBE2G2;DKFZp586L2318	>sp|P60604-2|UB2G2_HUMAN Isoform 2 of Ubiquitin-conjugating enzyme E2 G2 OS=Homo sapiens GN=UBE2G2;>sp|P60604|UB2G2_HUMAN Ubiquitin-conjugating enzyme E2 G2 OS=Homo sapiens GN=UBE2G2 PE=1 SV=1;>tr|Q8NDD5|Q8NDD5_HUMAN Putative uncharacterized protein DKFZp5	1.0104	4	0.73166	1.1276	NaN	1.36676	+	0.886839		NaN		1	1.1268
Q5VZB5;H0Y2P8;B7ZM87;O75044;A2RUF3;B7Z3G4;H0Y4C3;B1AKK3;B4DFE5;Q5VZB4;P0DJJ0;B4DDU0;G5EA48;Q7Z6B7-2;Q7Z6B7	SLIT-ROBO Rho GTPase-activating protein 2	SRGAP2	>tr|Q5VZB5|Q5VZB5_HUMAN SLIT-ROBO Rho GTPase activating protein 2 (Fragment) OS=Homo sapiens GN=SRGAP2 PE=4 SV=1;>tr|H0Y2P8|H0Y2P8_HUMAN SLIT-ROBO Rho GTPase-activating protein 2 (Fragment) OS=Homo sapiens GN=SRGAP2 PE=1 SV=1;>tr|B7ZM87|B7ZM87_HUMAN SRGAP2	1.0126	4	NaN	0.71536	NaN	NaN		1.3979	+	NaN		1	1.3979
C9J4Z3;P61513;G5E9R3;M0R0A1;Q6P4E4;E9PEL3;M0R2L6	60S ribosomal protein L37a	RPL37A	>tr|C9J4Z3|C9J4Z3_HUMAN 60S ribosomal protein L37a OS=Homo sapiens GN=RPL37A PE=1 SV=1;>sp|P61513|RL37A_HUMAN 60S ribosomal protein L37a OS=Homo sapiens GN=RPL37A PE=1 SV=2;>tr|G5E9R3|G5E9R3_HUMAN 60S ribosomal protein L37a OS=Homo sapiens GN=RPL37A PE=1 S	1.0152	6	1.4035	1.0152	0.90526	0.712504	+	0.985028		1.10466		1	0.985028
Q9NRX1;B2R823;F8WBJ6	RNA-binding protein PNO1	PNO1	>sp|Q9NRX1|PNO1_HUMAN RNA-binding protein PNO1 OS=Homo sapiens GN=PNO1 PE=1 SV=1;>tr|B2R823|B2R823_HUMAN cDNA, FLJ93703, highly similar to Homo sapiens putatative 28 kDa protein (LOC56902), mRNA OS=Homo sapiens PE=2 SV=1;>tr|F8WBJ6|F8WBJ6_HUMAN RNA-binding	1.02	8	0.4678	NaN	1.2751	2.13767	+	NaN		0.784252		1	1.46096
B4DUN9;H7BXY5;Q0ZGT2-4;D3DQ79;Q0ZGT2-2;Q0ZGT2;Q7Z4C7;E7ETM8;B4DDI0;E7EUA0;Q0ZGT2-3	Nexilin	NEXN	>tr|B4DUN9|B4DUN9_HUMAN cDNA FLJ56909, highly similar to Rattus norvegicus nexilin (Nexn), transcript variant s, mRNA OS=Homo sapiens PE=2 SV=1;>tr|H7BXY5|H7BXY5_HUMAN Nexilin (Fragment) OS=Homo sapiens GN=NEXN PE=1 SV=1;>sp|Q0ZGT2-4|NEXN_HUMAN Isoform 4 o	1.0275	4	0.8973	1.4582	NaN	1.11445		0.685777	+	NaN		1	0.900116
Q96D46;B3KT11;C9JA08;B4DKU1;B3KMN5;C9IY70;C9IZW9;C9K0C2;C9J0B9	60S ribosomal export protein NMD3	NMD3	>sp|Q96D46|NMD3_HUMAN 60S ribosomal export protein NMD3 OS=Homo sapiens GN=NMD3 PE=1 SV=1;>tr|B3KT11|B3KT11_HUMAN cDNA FLJ37430 fis, clone BRAWH2001679, highly similar to Homo sapiens NMD3 homolog (NMD3), mRNA OS=Homo sapiens PE=2 SV=1;>tr|C9JA08|C9JA08_HU	1.0302	5	0.93886	NaN	1.4858	1.06512		NaN		0.673038	+	1	0.86908
Q8NAV1	Pre-mRNA-splicing factor 38A	PRPF38A	>sp|Q8NAV1|PR38A_HUMAN Pre-mRNA-splicing factor 38A OS=Homo sapiens GN=PRPF38A PE=1 SV=1	1.0317	5	NaN	0.92791	0.67106	NaN		1.07769		1.49018	+	1	1.28394
Q9Y312;A2A2Q9	Protein AAR2 homolog	AAR2	>sp|Q9Y312|AAR2_HUMAN Protein AAR2 homolog OS=Homo sapiens GN=AAR2 PE=1 SV=2;>tr|A2A2Q9|A2A2Q9_HUMAN Protein AAR2 homolog OS=Homo sapiens GN=AAR2 PE=1 SV=1	1.0321	4	1.4186	1.0668	NaN	0.70492	+	0.937383		NaN		1	0.821152
A2VCL5;B4DVY7;Q6IB58;Q5ST80;O75955;Q53HQ0;A2AB09	Flotillin-1	FLOT1	>tr|A2VCL5|A2VCL5_HUMAN FLOT1 protein (Fragment) OS=Homo sapiens GN=FLOT1 PE=2 SV=1;>tr|B4DVY7|B4DVY7_HUMAN Flotillin-1 OS=Homo sapiens GN=FLOT1 PE=1 SV=1;>tr|Q6IB58|Q6IB58_HUMAN FLOT1 protein OS=Homo sapiens GN=FLOT1 PE=2 SV=1;>tr|Q5ST80|Q5ST80_HUMAN FLOT	1.0323	7	1.0323	1.439	1.085	0.968711		0.694927	+	0.921659		1	0.921659
B7ZL34;Q8TB72-4;Q8TB72-3;Q8TB72-2;Q8TB72	Pumilio homolog 2	PUM2	>tr|B7ZL34|B7ZL34_HUMAN PUM2 protein OS=Homo sapiens GN=PUM2 PE=2 SV=1;>sp|Q8TB72-4|PUM2_HUMAN Isoform 4 of Pumilio homolog 2 OS=Homo sapiens GN=PUM2;>sp|Q8TB72-3|PUM2_HUMAN Isoform 3 of Pumilio homolog 2 OS=Homo sapiens GN=PUM2;>sp|Q8TB72-2|PUM2_HUMAN Iso	1.0365	5	1.5602	NaN	1.0365	0.640943	+	NaN		0.964785		1	0.802864
Q93034;L0L6D8;E9PP19;H0YCA0;L0L6C1	Cullin-5	CUL5	>sp|Q93034|CUL5_HUMAN Cullin-5 OS=Homo sapiens GN=CUL5 PE=1 SV=4;>tr|L0L6D8|L0L6D8_HUMAN CUL5 (Fragment) OS=Homo sapiens GN=CUL5 PE=4 SV=1	1.0367	9	1.0531	1.0522	0.69923	0.949577		0.95039		1.43014	+	1	0.95039
O14949;B7Z4A1	Cytochrome b-c1 complex subunit 8	UQCRQ	>sp|O14949|QCR8_HUMAN Cytochrome b-c1 complex subunit 8 OS=Homo sapiens GN=UQCRQ PE=1 SV=4;>tr|B7Z4A1|B7Z4A1_HUMAN cDNA FLJ50798, weakly similar to Ubiquinol-cytochrome c reductase complex ubiquinone-binding protein QP-C (EC 1.10.2.2) OS=Homo sapiens PE=2	1.0384	3	6.149	NaN	NaN	0.162628	+	NaN		NaN		1	0.162628
J3KNC1;Q05BV3;Q05BV3-5;H0YJS1;Q05BV3-2;Q6ZMW3-2;Q6ZMW3	Echinoderm microtubule-associated protein-like 5;Echinoderm microtubule-associated protein-like 6	EML5;EML6	>tr|J3KNC1|J3KNC1_HUMAN Echinoderm microtubule-associated protein-like 5 OS=Homo sapiens GN=EML5 PE=4 SV=1;>sp|Q05BV3|EMAL5_HUMAN Echinoderm microtubule-associated protein-like 5 OS=Homo sapiens GN=EML5 PE=2 SV=3;>sp|Q05BV3-5|EMAL5_HUMAN Isoform 5 of Echin	1.0385	4	1.0385	0.72798	NaN	0.962927		1.37366	+	NaN		1	1.1683
C9JK83;O95630;C9JZ93;C9JEK5;F5H5B9;B5M0B6	STAM-binding protein	STAMBP	>tr|C9JK83|C9JK83_HUMAN STAM-binding protein (Fragment) OS=Homo sapiens GN=STAMBP PE=1 SV=1;>sp|O95630|STABP_HUMAN STAM-binding protein OS=Homo sapiens GN=STAMBP PE=1 SV=1;>tr|C9JZ93|C9JZ93_HUMAN STAM-binding protein (Fragment) OS=Homo sapiens GN=STAMBP PE	1.039	3	1.1	NaN	1.3827	0.909091		NaN		0.723223	+	1	0.816157
Q8TDD1;Q8TDD1-2;F8VRX4;H0YHH7	ATP-dependent RNA helicase DDX54	DDX54	>sp|Q8TDD1|DDX54_HUMAN ATP-dependent RNA helicase DDX54 OS=Homo sapiens GN=DDX54 PE=1 SV=2;>sp|Q8TDD1-2|DDX54_HUMAN Isoform 2 of ATP-dependent RNA helicase DDX54 OS=Homo sapiens GN=DDX54	1.0395	11	1.0278	1.4818	1.0389	0.972952		0.674855	+	0.962557		1	0.962557
Q9UQ88-4;P21127-8;J3QR29;B4E3D9;Q9UQ88-3;Q5QPR3;Q9UQ88-2;P21127-3;P21127-2;B7ZVY7;Q9UQ88;J3QKR5;J3QR44;P21127;P21127-6;J3KTL7;Q5QPR4;P21127-9;Q9UQ88-10;P21127-12;P21127-4;Q96CA8;Q6P5Y5;Q4VBY6;P21127-5;A4VCI5;P21127-10;J3QL65;Q9UQ88-5;B4E0M9;Q9UQ88-9;B4E0N4;Q9UQ88-8;Q05C84;Q6PK02;J3KS35;E7ESP2;Q5QPQ9;X6R529;Q3SWV2;E9PFJ2;A0A024R065;A0A024R0C4;G8JLH1;B4DWE4;Q59GL4;Q13882	Cyclin-dependent kinase 11A;Cyclin-dependent kinase 11B	CDK11A;CDK11B;CDC2L1;CDC2L2	>sp|Q9UQ88-4|CD11A_HUMAN Isoform SV3 of Cyclin-dependent kinase 11A OS=Homo sapiens GN=CDK11A;>sp|P21127-8|CD11B_HUMAN Isoform 8 of Cyclin-dependent kinase 11B OS=Homo sapiens GN=CDK11B;>tr|J3QR29|J3QR29_HUMAN Cyclin-dependent kinase 11B OS=Homo sapiens GN	1.0395	5	0.5951	1.3118	0.99822	1.68039	+	0.762311		1.00178		1	1.00178
Q86TU7;A0A024R6K3;Q86TU7-3;Q6NXR6;Q86TU7-2;C9K0W5	Histone-lysine N-methyltransferase setd3	SETD3	>sp|Q86TU7|SETD3_HUMAN Histone-lysine N-methyltransferase setd3 OS=Homo sapiens GN=SETD3 PE=1 SV=1;>tr|A0A024R6K3|A0A024R6K3_HUMAN SET domain containing 3, isoform CRA_a OS=Homo sapiens GN=SETD3 PE=4 SV=1;>sp|Q86TU7-3|SETD3_HUMAN Isoform 3 of Histone-lysin	1.0397	7	1.095	2.0681	0.9972	0.913242		0.483536	+	1.00281		1	0.913242
P51665;H3BNT7;H3BTM8;B2RD27;B4DXI8	26S proteasome non-ATPase regulatory subunit 7	PSMD7	>sp|P51665|PSMD7_HUMAN 26S proteasome non-ATPase regulatory subunit 7 OS=Homo sapiens GN=PSMD7 PE=1 SV=2;>tr|H3BNT7|H3BNT7_HUMAN 26S proteasome non-ATPase regulatory subunit 7 OS=Homo sapiens GN=PSMD7 PE=1 SV=1;>tr|H3BTM8|H3BTM8_HUMAN 26S proteasome non-AT	1.0407	8	0.95166	1.0247	42.138	1.0508		0.975895		0.0237315	+	1	0.975895
Q5T7U1;Q9Y5Q8-2;H7BY84;Q9Y5Q8;Q9Y5Q8-3;Q9NXK9;Q5T7U0;H9KV68;B7Z1V3	General transcription factor 3C polypeptide 5	GTF3C5	>tr|Q5T7U1|Q5T7U1_HUMAN General transcription factor 3C polypeptide 5 OS=Homo sapiens GN=GTF3C5 PE=1 SV=1;>sp|Q9Y5Q8-2|TF3C5_HUMAN Isoform 2 of General transcription factor 3C polypeptide 5 OS=Homo sapiens GN=GTF3C5;>tr|H7BY84|H7BY84_HUMAN General transcri	1.0412	4	1.1618	0.75094	1.2997	0.860733		1.33166	+	0.769408		1	0.860733
P35908;CON__P35908;CON__Q9R0H5;CON__Q6NXH9;CON__Q6IFZ6;Q7Z794;Q0IIN1;CON__Q7Z794	Keratin, type II cytoskeletal 2 epidermal	KRT2	>sp|P35908|K22E_HUMAN Keratin, type II cytoskeletal 2 epidermal OS=Homo sapiens GN=KRT2 PE=1 SV=2;>P35908 SWISS-PROT:P35908 Tax_Id=9606 Gene_Symbol=KRT2 Keratin, type II cytoskeletal 2 epidermal	1.0415	5	0.78905	0.5206	1.137	1.26735		1.92086	+	0.879507		1	1.26735
G8JLI6;Q8IVL6;Q8IVL6-2;Q59FY9	Prolyl 3-hydroxylase 3	LEPREL2	>tr|G8JLI6|G8JLI6_HUMAN Prolyl 3-hydroxylase 3 OS=Homo sapiens GN=LEPREL2 PE=1 SV=1;>sp|Q8IVL6|P3H3_HUMAN Prolyl 3-hydroxylase 3 OS=Homo sapiens GN=LEPREL2 PE=1 SV=1;>sp|Q8IVL6-2|P3H3_HUMAN Isoform 2 of Prolyl 3-hydroxylase 3 OS=Homo sapiens GN=LEPREL2;>tr	1.0418	13	0.9081	1.4358	0.97639	1.1012		0.696476	+	1.02418		1	1.02418
P29084	Transcription initiation factor IIE subunit beta	GTF2E2	>sp|P29084|T2EB_HUMAN Transcription initiation factor IIE subunit beta OS=Homo sapiens GN=GTF2E2 PE=1 SV=1	1.0436	4	1.5208	NaN	NaN	0.657549	+	NaN		NaN		1	0.657549
Q5RKV6	Exosome complex component MTR3	EXOSC6	>sp|Q5RKV6|EXOS6_HUMAN Exosome complex component MTR3 OS=Homo sapiens GN=EXOSC6 PE=1 SV=1	1.0462	3	1.863	1.0462	NaN	0.536769	+	0.95584		NaN		1	0.746304
B7ZAP3;B7Z1N3;Q969N2-3;Q969N2-2;B7Z3L1;F5GWY0;B7Z1F1;Q969N2-4;Q969N2-6;Q969N2-5;Q969N2;H7C2Y2;B7Z4T7	GPI transamidase component PIG-T	PIGT	>tr|B7ZAP3|B7ZAP3_HUMAN cDNA, FLJ79257, highly similar to GPI transamidase component PIG-T OS=Homo sapiens PE=2 SV=1;>tr|B7Z1N3|B7Z1N3_HUMAN GPI transamidase component PIG-T OS=Homo sapiens GN=PIGT PE=1 SV=1;>sp|Q969N2-3|PIGT_HUMAN Isoform 3 of GPI transam	1.0466	3	NaN	NaN	2.0302	NaN		NaN		0.492562	+	1	0.492562
Q9H0R4-2;K7ER15;V9HW73;Q9H0R4;K7EMY7	Haloacid dehalogenase-like hydrolase domain-containing protein 2	HDHD2	>sp|Q9H0R4-2|HDHD2_HUMAN Isoform 2 of Haloacid dehalogenase-like hydrolase domain-containing protein 2 OS=Homo sapiens GN=HDHD2;>tr|K7ER15|K7ER15_HUMAN Haloacid dehalogenase-like hydrolase domain-containing protein 2 (Fragment) OS=Homo sapiens GN=HDHD2 PE=	1.0498	4	1.0498	0.76054	NaN	0.952562		1.31486	+	NaN		1	1.13371
E9PMW3;E9PMJ2;J3KP39;Q9BPY3;A0A024R3L8	Protein FAM118B	FAM118B	>tr|E9PMW3|E9PMW3_HUMAN Protein FAM118B (Fragment) OS=Homo sapiens GN=FAM118B PE=1 SV=1;>tr|E9PMJ2|E9PMJ2_HUMAN Protein FAM118B (Fragment) OS=Homo sapiens GN=FAM118B PE=1 SV=2;>tr|J3KP39|J3KP39_HUMAN Protein FAM118B OS=Homo sapiens GN=FAM118B PE=1 SV=1;>sp	1.0502	4	NaN	1.3943	NaN	NaN		0.717206	+	NaN		1	0.717206
Q9BT73;A0A024R806	Proteasome assembly chaperone 3	PSMG3	>sp|Q9BT73|PSMG3_HUMAN Proteasome assembly chaperone 3 OS=Homo sapiens GN=PSMG3 PE=1 SV=1;>tr|A0A024R806|A0A024R806_HUMAN Uncharacterized protein OS=Homo sapiens GN=MGC10911 PE=4 SV=1	1.0523	3	1.4509	0.99002	NaN	0.689227	+	1.01008		NaN		1	0.849654
O15294-3;O15294;Q548W1;O15294-2;O15294-4;Q9H5T3;C9JZL3;B4DTL6;H7C2T7	UDP-N-acetylglucosamine--peptide N-acetylglucosaminyltransferase 110 kDa subunit	OGT	>sp|O15294-3|OGT1_HUMAN Isoform 1 of UDP-N-acetylglucosamine--peptide N-acetylglucosaminyltransferase 110 kDa subunit OS=Homo sapiens GN=OGT;>sp|O15294|OGT1_HUMAN UDP-N-acetylglucosamine--peptide N-acetylglucosaminyltransferase 110 kDa subunit OS=Homo sapi	1.0529	8	1.0135	1.6647	0.79801	0.98668		0.600709	+	1.25312		1	0.98668
Q16540;B2R9J4;A0A024RCB2;H7C2P7;A6NJD9;A8MVT4;A8MYK1	39S ribosomal protein L23, mitochondrial	MRPL23	>sp|Q16540|RM23_HUMAN 39S ribosomal protein L23, mitochondrial OS=Homo sapiens GN=MRPL23 PE=1 SV=1;>tr|B2R9J4|B2R9J4_HUMAN cDNA, FLJ94423, highly similar to Homo sapiens mitochondrial ribosomal protein L23 (MRPL23), nuclear gene encoding mitochondrial prot	1.0531	3	1.0531	2.5527	1.1337	0.949577		0.391742	+	0.882068		1	0.882068
F8WEX7;F8WF14;P06276;A0A024CIM4;D3DNN4	Cholinesterase	BCHE	>tr|F8WEX7|F8WEX7_HUMAN Cholinesterase OS=Homo sapiens GN=BCHE PE=4 SV=1;>tr|F8WF14|F8WF14_HUMAN Cholinesterase OS=Homo sapiens GN=BCHE PE=4 SV=1;>sp|P06276|CHLE_HUMAN Cholinesterase OS=Homo sapiens GN=BCHE PE=1 SV=1;>tr|A0A024CIM4|A0A024CIM4_HUMAN Butyryl	1.0542	4	NaN	1.1528	0.64513	NaN		0.867453		1.55008	+	1	1.20876
Q86X55-1;Q86X55;Q86X55-2;K7EQA8;K7EK20;K7EPK1	Histone-arginine methyltransferase CARM1	CARM1	>sp|Q86X55-1|CARM1_HUMAN Isoform 1 of Histone-arginine methyltransferase CARM1 OS=Homo sapiens GN=CARM1;>sp|Q86X55|CARM1_HUMAN Histone-arginine methyltransferase CARM1 OS=Homo sapiens GN=CARM1 PE=1 SV=3;>sp|Q86X55-2|CARM1_HUMAN Isoform 2 of Histone-arginin	1.0549	6	1.3143	0.98187	1.3712	0.760861		1.01846		0.729288	+	1	0.760861
Q86V48-2;Q86V48-3;Q86V48;A0A024RAC0;E5RFK8;Q05DE3	Leucine zipper protein 1	LUZP1	>sp|Q86V48-2|LUZP1_HUMAN Isoform 2 of Leucine zipper protein 1 OS=Homo sapiens GN=LUZP1;>sp|Q86V48-3|LUZP1_HUMAN Isoform 3 of Leucine zipper protein 1 OS=Homo sapiens GN=LUZP1;>sp|Q86V48|LUZP1_HUMAN Leucine zipper protein 1 OS=Homo sapiens GN=LUZP1 PE=1 SV	1.0586	8	1.1419	0.74705	NaN	0.875733		1.3386	+	NaN		1	1.10717
P48651;A8KAH1;J3KNR6;B4DE85;Q9BUQ5;Q9BSY0	Phosphatidylserine synthase 1	PTDSS1	>sp|P48651|PTSS1_HUMAN Phosphatidylserine synthase 1 OS=Homo sapiens GN=PTDSS1 PE=1 SV=1;>tr|A8KAH1|A8KAH1_HUMAN cDNA FLJ75839, highly similar to Homo sapiens phosphatidylserine synthase 1 (PTDSS1), mRNA OS=Homo sapiens PE=2 SV=1;>tr|J3KNR6|J3KNR6_HUMAN Ph	1.0586	4	1.0211	0.72261	NaN	0.979336		1.38387	+	NaN		1	1.1816
O15230;Q5JTP4;E2QRK0;Q5U4N9	Laminin subunit alpha-5	LAMA5	>sp|O15230|LAMA5_HUMAN Laminin subunit alpha-5 OS=Homo sapiens GN=LAMA5 PE=1 SV=8	1.0608	4	2.1039	NaN	NaN	0.475308	+	NaN		NaN		1	0.475308
Q9NY27;C9IZ04;Q9NY27-2;Q9NY27-3;H7C559;F8WDK3;C9IZF4;F8WCA1;D3DTC3	Serine/threonine-protein phosphatase 4 regulatory subunit 2	PPP4R2	>sp|Q9NY27|PP4R2_HUMAN Serine/threonine-protein phosphatase 4 regulatory subunit 2 OS=Homo sapiens GN=PPP4R2 PE=1 SV=3;>tr|C9IZ04|C9IZ04_HUMAN Serine/threonine-protein phosphatase 4 regulatory subunit 2 (Fragment) OS=Homo sapiens GN=PPP4R2 PE=1 SV=1;>sp|Q9	1.062	4	0.97693	0.76281	1.1114	1.02361		1.31094	+	0.899766		1	1.02361
Q86TI2-4;Q86TI2	Dipeptidyl peptidase 9	DPP9	>sp|Q86TI2-4|DPP9_HUMAN Isoform 3 of Dipeptidyl peptidase 9 OS=Homo sapiens GN=DPP9;>sp|Q86TI2|DPP9_HUMAN Dipeptidyl peptidase 9 OS=Homo sapiens GN=DPP9 PE=1 SV=3	1.0621	7	0.74321	1.0621	1.0661	1.34551	+	0.941531		0.937998		1	0.941531
Q96EY5-3;Q96EY5;E9PQA6;A8K0C2;A0A024R7L6;E9PLL0;Q96EY5-2;M0QZK6;E9PLZ8	Multivesicular body subunit 12A	MVB12A	>sp|Q96EY5-3|MB12A_HUMAN Isoform 3 of Multivesicular body subunit 12A OS=Homo sapiens GN=MVB12A;>sp|Q96EY5|MB12A_HUMAN Multivesicular body subunit 12A OS=Homo sapiens GN=MVB12A PE=1 SV=1;>tr|E9PQA6|E9PQA6_HUMAN Multivesicular body subunit 12A OS=Homo sapie	1.0641	5	0.98933	1.0641	1.3874	1.01079		0.939761		0.720773	+	1	0.939761
Q96C86;Q53G42	m7GpppX diphosphatase	DCPS	>sp|Q96C86|DCPS_HUMAN m7GpppX diphosphatase OS=Homo sapiens GN=DCPS PE=1 SV=2;>tr|Q53G42|Q53G42_HUMAN mRNA decapping enzyme variant (Fragment) OS=Homo sapiens PE=2 SV=1	1.0646	7	1.4091	1.0265	1.0646	0.709673	+	0.974184		0.93932		1	0.93932
D3VVG9;D3VVJ1;D3VVR7;D3VVI8;D3VVT5;D3VVI9;D3VVG7;D3VVD6;D3VVT6;D3VVG8;D3VVD7;D3VVQ2;D3VVB3;D3VVD3;D3VVN1;D3VVI2;D3VVL5;D3VVJ9;D3VVK7;D3VVS4;D3VVC3;D3VVK9;D3VVI7;G3V526;E9PJN5;D3VVR8;D3VVK4;D3VVM2;D3VVD4;D3VVN3;D3VVP8;D3VVJ8;D3VVR5;G3V4U9;D3VVM6;D3VVL3;D3VVC9;D3VVQ3;D3VVQ8;D3VVQ6;D3VVQ1;D3VVQ0;D3VVB2;D3VVS2;D3VVQ5;D3VVQ4;D3VVP1;D3VVB1;D3VVB0;D3VVR4;D3VVE5;D3VVL1;D3VVL2;D3VVR3;D3VVE3;D3VVJ5;D3VVH9;…	Ataxin-3	ATXN3	>tr|D3VVG9|D3VVG9_HUMAN Ataxin 3 variant ref (Fragment) OS=Homo sapiens GN=ATXN3 PE=2 SV=1;>tr|D3VVJ1|D3VVJ1_HUMAN Ataxin 3 variant ref (Fragment) OS=Homo sapiens GN=ATXN3 PE=2 SV=1;>tr|D3VVR7|D3VVR7_HUMAN Ataxin 3 variant e (Fragment) OS=Homo sapiens GN=A	1.0666	10	1.9016	1.0987	1.0121	0.525873	+	0.910167		0.988045		1	0.910167
J3KS15;Q14197;J3QRF8	Peptidyl-tRNA hydrolase ICT1, mitochondrial	ICT1	>tr|J3KS15|J3KS15_HUMAN Peptidyl-tRNA hydrolase ICT1, mitochondrial (Fragment) OS=Homo sapiens GN=ICT1 PE=1 SV=1;>sp|Q14197|ICT1_HUMAN Peptidyl-tRNA hydrolase ICT1, mitochondrial OS=Homo sapiens GN=ICT1 PE=1 SV=1	1.0697	8	1.001	1.3569	0.99098	0.999001		0.736974	+	1.0091		1	0.999001
O75376-2;Q7Z516;O75376;A0A024RD47;O75376-3;Q86YY1;B4DJ25;Q9NSZ0;B4DZ48;E7EVK1	Nuclear receptor corepressor 1	NCOR1;DKFZp434M075	>sp|O75376-2|NCOR1_HUMAN Isoform 2 of Nuclear receptor corepressor 1 OS=Homo sapiens GN=NCOR1;>tr|Q7Z516|Q7Z516_HUMAN Nuclear receptor co-repressor OS=Homo sapiens PE=2 SV=1;>sp|O75376|NCOR1_HUMAN Nuclear receptor corepressor 1 OS=Homo sapiens GN=NCOR1 PE=	1.0699	5	2.5109	NaN	NaN	0.398264	+	NaN		NaN		1	0.398264
Q9UBV2;G3V3B3;Q9UBV2-2;Q3ZCU6	Protein sel-1 homolog 1	SEL1L	>sp|Q9UBV2|SE1L1_HUMAN Protein sel-1 homolog 1 OS=Homo sapiens GN=SEL1L PE=1 SV=3;>tr|G3V3B3|G3V3B3_HUMAN Protein sel-1 homolog 1 (Fragment) OS=Homo sapiens GN=SEL1L PE=1 SV=1;>sp|Q9UBV2-2|SE1L1_HUMAN Isoform 2 of Protein sel-1 homolog 1 OS=Homo sapiens GN	1.0706	4	0.95197	1.3661	1.1653	1.05045		0.732011	+	0.858148		1	0.858148
Q9Y333	U6 snRNA-associated Sm-like protein LSm2	LSM2	>sp|Q9Y333|LSM2_HUMAN U6 snRNA-associated Sm-like protein LSm2 OS=Homo sapiens GN=LSM2 PE=1 SV=1	1.0711	8	0.97087	1.334	1.0696	1.03		0.749625	+	0.934929		1	0.934929
Q9Y5P4-2;A0A024RAJ5;Q9Y5P4;Q9Y5P4-3	Collagen type IV alpha-3-binding protein	COL4A3BP	>sp|Q9Y5P4-2|C43BP_HUMAN Isoform 2 of Collagen type IV alpha-3-binding protein OS=Homo sapiens GN=COL4A3BP;>tr|A0A024RAJ5|A0A024RAJ5_HUMAN Collagen, type IV, alpha 3 (Goodpasture antigen) binding protein, isoform CRA_a OS=Homo sapiens GN=COL4A3BP PE=4 SV=1	1.0717	3	1.3828	NaN	1.3278	0.72317	+	NaN		0.753125		1	0.738148
B4E2E1;B4DTM6;O95487-2;O95487;O95487-3	Protein transport protein Sec24B	SEC24B	>tr|B4E2E1|B4E2E1_HUMAN cDNA FLJ54322, highly similar to Protein transport protein Sec24B OS=Homo sapiens PE=2 SV=1;>tr|B4DTM6|B4DTM6_HUMAN cDNA FLJ61391, highly similar to Protein transport protein Sec24B OS=Homo sapiens PE=2 SV=1;>sp|O95487-2|SC24B_HUMAN	1.0819	5	2.8995	1.0819	1.3032	0.344887	+	0.9243		0.767342		1	0.767342
Q96TA2-3;Q96TA2-2;A8K5H7;Q96TA2;Q96I63;Q9Y2Q2;Q9NQ51;R4GNA5;Q5T8D1;Q5T8D2	ATP-dependent zinc metalloprotease YME1L1	YME1L1;FTSH	>sp|Q96TA2-3|YMEL1_HUMAN Isoform 3 of ATP-dependent zinc metalloprotease YME1L1 OS=Homo sapiens GN=YME1L1;>sp|Q96TA2-2|YMEL1_HUMAN Isoform 2 of ATP-dependent zinc metalloprotease YME1L1 OS=Homo sapiens GN=YME1L1;>tr|A8K5H7|A8K5H7_HUMAN cDNA FLJ77542, highl	1.0823	15	0.93557	1.0274	1.4446	1.06887		0.973331		0.692233	+	1	0.973331
I3L4A2;Q9UIC8;Q9UIC8-2;Q9UIC8-3;I3L2E3;I3L2Q8;I3L537	Leucine carboxyl methyltransferase 1	LCMT1	>tr|I3L4A2|I3L4A2_HUMAN Leucine carboxyl methyltransferase 1 (Fragment) OS=Homo sapiens GN=LCMT1 PE=1 SV=1;>sp|Q9UIC8|LCMT1_HUMAN Leucine carboxyl methyltransferase 1 OS=Homo sapiens GN=LCMT1 PE=1 SV=2;>sp|Q9UIC8-2|LCMT1_HUMAN Isoform 2 of Leucine carboxyl	1.0842	5	1.0373	1.0074	0.71087	0.964041		0.992654		1.40673	+	1	0.992654
Q8NC56;A0A024RCZ1;D6R958;D6RBV0;Q8NC56-2;H7C2Z0	LEM domain-containing protein 2	LEMD2	>sp|Q8NC56|LEMD2_HUMAN LEM domain-containing protein 2 OS=Homo sapiens GN=LEMD2 PE=1 SV=1;>tr|A0A024RCZ1|A0A024RCZ1_HUMAN LEM domain containing 2, isoform CRA_a OS=Homo sapiens GN=LEMD2 PE=4 SV=1;>tr|D6R958|D6R958_HUMAN LEM domain-containing protein 2 (Fra	1.0852	5	NaN	1.0309	1.4303	NaN		0.970026		0.699154	+	1	0.83459
Q8IWR8;J3QR09;J3KTE4;Q53G49;P84098;J3QL15	Ribosomal protein L19;60S ribosomal protein L19	RPL19	>tr|Q8IWR8|Q8IWR8_HUMAN Ribosomal protein L19 (Fragment) OS=Homo sapiens PE=2 SV=1;>tr|J3QR09|J3QR09_HUMAN Ribosomal protein L19 OS=Homo sapiens GN=RPL19 PE=1 SV=1;>tr|J3KTE4|J3KTE4_HUMAN Ribosomal protein L19 OS=Homo sapiens GN=RPL19 PE=1 SV=1;>tr|Q53G49|	1.0859	6	1.834	1.0936	1.0871	0.545256	+	0.914411		0.919879		1	0.914411
Q9Y2S0	DNA-directed RNA polymerases I and III subunit RPAC2	POLR1D	>sp|Q9Y2S0|RPAC2_HUMAN DNA-directed RNA polymerases I and III subunit RPAC2 OS=Homo sapiens GN=POLR1D PE=1 SV=1	1.086	5	NaN	1.0874	0.48789	NaN		0.919625		2.04964	+	1	1.48463
Q567R6;Q04837;A4D1U3;E7EUY5;B7Z268;C9K0U8	Single-stranded DNA-binding protein;Single-stranded DNA-binding protein, mitochondrial	SSBP1	>tr|Q567R6|Q567R6_HUMAN Single-stranded DNA-binding protein OS=Homo sapiens GN=SSBP1 PE=2 SV=1;>sp|Q04837|SSBP_HUMAN Single-stranded DNA-binding protein, mitochondrial OS=Homo sapiens GN=SSBP1 PE=1 SV=1;>tr|A4D1U3|A4D1U3_HUMAN Single-stranded DNA-binding p	1.0864	16	1.0586	1.1218	0.69377	0.944644		0.891424		1.4414	+	1	0.944644
O60343-2;O60343-3;O60343;A0A024R637;O60343-4;O60343-5	TBC1 domain family member 4	TBC1D4	>sp|O60343-2|TBCD4_HUMAN Isoform 2 of TBC1 domain family member 4 OS=Homo sapiens GN=TBC1D4;>sp|O60343-3|TBCD4_HUMAN Isoform 3 of TBC1 domain family member 4 OS=Homo sapiens GN=TBC1D4;>sp|O60343|TBCD4_HUMAN TBC1 domain family member 4 OS=Homo sapiens GN=TB	1.0869	9	1.0404	1.0869	0.71009	0.961169		0.920048		1.40827	+	1	0.961169
O75150-3;A8K6K1;O75150;A0A024QZG0;O75150-4;H3BP71;F8W8Z4;B4DMM1;B3KQV1;B4DEN2;B4DFU2;H3BS50;B4E313;Q6ZN99	E3 ubiquitin-protein ligase BRE1B	RNF40	>sp|O75150-3|BRE1B_HUMAN Isoform 3 of E3 ubiquitin-protein ligase BRE1B OS=Homo sapiens GN=RNF40;>tr|A8K6K1|A8K6K1_HUMAN cDNA FLJ78667, highly similar to Homo sapiens ring finger protein 40 (RNF40), transcript variant 1, mRNA OS=Homo sapiens PE=2 SV=1;>sp|	1.087	10	1.0745	0.95239	1.4837	0.930665		1.04999		0.673991	+	1	0.930665
Q9BU23-2;Q9BU23;Q9BU23-3	Lipase maturation factor 2	LMF2	>sp|Q9BU23-2|LMF2_HUMAN Isoform 2 of Lipase maturation factor 2 OS=Homo sapiens GN=LMF2;>sp|Q9BU23|LMF2_HUMAN Lipase maturation factor 2 OS=Homo sapiens GN=LMF2 PE=1 SV=2;>sp|Q9BU23-3|LMF2_HUMAN Isoform 3 of Lipase maturation factor 2 OS=Homo sapiens GN=LM	1.087	4	1.416	1.0481	NaN	0.706215	+	0.954107		NaN		1	0.830161
Q9Y5T5-2;Q9Y5T5;B4DUS4;Q9Y5T5-4;Q9Y5T5-3;H9KVB6;Q9Y5T5-5	Ubiquitin carboxyl-terminal hydrolase 16	USP16	>sp|Q9Y5T5-2|UBP16_HUMAN Isoform 2 of Ubiquitin carboxyl-terminal hydrolase 16 OS=Homo sapiens GN=USP16;>sp|Q9Y5T5|UBP16_HUMAN Ubiquitin carboxyl-terminal hydrolase 16 OS=Homo sapiens GN=USP16 PE=1 SV=1;>tr|B4DUS4|B4DUS4_HUMAN Ubiquitin carboxyl-terminal h	1.0884	6	1.0884	0.96889	1.6013	0.91878		1.03211		0.624493	+	1	0.91878
Q9BYN8	28S ribosomal protein S26, mitochondrial	MRPS26	>sp|Q9BYN8|RT26_HUMAN 28S ribosomal protein S26, mitochondrial OS=Homo sapiens GN=MRPS26 PE=1 SV=1	1.089	9	1.0593	1.1247	1.8044	0.94402		0.889126		0.554201	+	1	0.889126
B4DFY5;Q02750;A4QPA9;Q02750-2;H3BRW9	Dual specificity mitogen-activated protein kinase kinase 1	MAP2K1	>tr|B4DFY5|B4DFY5_HUMAN Mitogen-activated protein kinase kinase 1, isoform CRA_d OS=Homo sapiens GN=MAP2K1 PE=2 SV=1;>sp|Q02750|MP2K1_HUMAN Dual specificity mitogen-activated protein kinase kinase 1 OS=Homo sapiens GN=MAP2K1 PE=1 SV=2;>tr|A4QPA9|A4QPA9_HUM	1.0898	5	1.0432	1.3394	1.0898	0.958589		0.746603	+	0.9176		1	0.9176
E9PLD0;Q9H0U4;Q6FIG4;Q92928;Q9H1C9;Q92927;B3KTE3;H0YMN7;Q59EP4;H0YLJ8;H0YL94;G5ELZ6;G5ELZ5;P59190-2;P59190;G5EMR8	Ras-related protein Rab-1B;Putative Ras-related protein Rab-1C	RAB1B;RAB1C	>tr|E9PLD0|E9PLD0_HUMAN Ras-related protein Rab-1B OS=Homo sapiens GN=RAB1B PE=3 SV=1;>sp|Q9H0U4|RAB1B_HUMAN Ras-related protein Rab-1B OS=Homo sapiens GN=RAB1B PE=1 SV=1;>tr|Q6FIG4|Q6FIG4_HUMAN RAB1B protein OS=Homo sapiens GN=RAB1B PE=2 SV=1;>sp|Q92928|R	1.0904	9	1.0952	1.0977	1.5894	0.913075		0.910996		0.629168	+	1	0.910996
Q96DI8;Q6FH11;P09601;B2R7U4;F2YMD9;B1AHA8;D2K7W4	Heme oxygenase 1	HMOX1	>tr|Q96DI8|Q96DI8_HUMAN Heme oxygenase (Decycling) 1 OS=Homo sapiens GN=HMOX1 PE=2 SV=1;>tr|Q6FH11|Q6FH11_HUMAN HMOX1 protein OS=Homo sapiens GN=HMOX1 PE=2 SV=1;>sp|P09601|HMOX1_HUMAN Heme oxygenase 1 OS=Homo sapiens GN=HMOX1 PE=1 SV=1;>tr|B2R7U4|B2R7U4_HU	1.0913	5	1.0913	1.1518	1.4637	0.916338		0.868206		0.6832	+	1	0.868206
P49815-7;P49815-6;X5D9D6;X5D7Q2;P49815-5;X5D2U8;H3BMQ0;P49815-3;P49815-2;P49815-4;P49815;H3BQY7;H3BNT5;H3BQK4;B3KSR9;B3KWH7;X5DRC8;X5D7Z6;X5D9K3	Tuberin	TSC2	>sp|P49815-7|TSC2_HUMAN Isoform 7 of Tuberin OS=Homo sapiens GN=TSC2;>sp|P49815-6|TSC2_HUMAN Isoform 6 of Tuberin OS=Homo sapiens GN=TSC2;>tr|X5D9D6|X5D9D6_HUMAN Tuberous sclerosis 2 isoform D (Fragment) OS=Homo sapiens GN=TSC2 PE=2 SV=1;>tr|X5D7Q2|X5D7Q2_	1.093	3	NaN	0.35634	1.0283	NaN		2.80631	+	0.972479		1	1.88939
Q13541	Eukaryotic translation initiation factor 4E-binding protein 1	EIF4EBP1	>sp|Q13541|4EBP1_HUMAN Eukaryotic translation initiation factor 4E-binding protein 1 OS=Homo sapiens GN=EIF4EBP1 PE=1 SV=3	1.0944	8	1.0944	0.66787	1.1315	0.913743		1.4973	+	0.883783		1	0.913743
P50402;Q5HY57	Emerin	EMD	>sp|P50402|EMD_HUMAN Emerin OS=Homo sapiens GN=EMD PE=1 SV=1;>tr|Q5HY57|Q5HY57_HUMAN Emerin OS=Homo sapiens GN=EMD PE=1 SV=1	1.0946	11	1.4716	1.1097	1.0946	0.679532	+	0.901144		0.913576		1	0.901144
X6R631;Q7Z7F7;A0A024R3R0;Q7Z7F7-2	39S ribosomal protein L55, mitochondrial	MRPL55	>tr|X6R631|X6R631_HUMAN 39S ribosomal protein L55, mitochondrial OS=Homo sapiens GN=MRPL55 PE=4 SV=1;>sp|Q7Z7F7|RM55_HUMAN 39S ribosomal protein L55, mitochondrial OS=Homo sapiens GN=MRPL55 PE=1 SV=1;>tr|A0A024R3R0|A0A024R3R0_HUMAN Mitochondrial ribosomal	1.0954	5	1.23	1.319	0.93737	0.813008		0.75815	+	1.06681		1	0.813008
Q8IUF8-4;Q8IUF8;D6RCB6;Q8IUF8-3;Q8IUF8-2	Bifunctional lysine-specific demethylase and histidyl-hydroxylase MINA	MINA	>sp|Q8IUF8-4|MINA_HUMAN Isoform 4 of Bifunctional lysine-specific demethylase and histidyl-hydroxylase MINA OS=Homo sapiens GN=MINA;>sp|Q8IUF8|MINA_HUMAN Bifunctional lysine-specific demethylase and histidyl-hydroxylase MINA OS=Homo sapiens GN=MINA PE=1 SV	1.0957	12	1.0392	1.0957	1.403	0.962279		0.912659		0.712758	+	1	0.912659
E9PMI6;J3KN38;P54105;E9PJF4;E9PQ83;Q9P1H0	Methylosome subunit pICln	CLNS1A	>tr|E9PMI6|E9PMI6_HUMAN Methylosome subunit pICln OS=Homo sapiens GN=CLNS1A PE=1 SV=1;>tr|J3KN38|J3KN38_HUMAN Methylosome subunit pICln OS=Homo sapiens GN=CLNS1A PE=1 SV=1;>sp|P54105|ICLN_HUMAN Methylosome subunit pICln OS=Homo sapiens GN=CLNS1A PE=1 SV=1;	1.0971	6	1.4929	0.81798	NaN	0.669837	+	1.22252		NaN		1	0.946181
Q5TCQ9-4;Q5TCQ9;Q5TCQ9-3;A0A024R0E9;Q5TCQ9-2;A0A024R0H3;H7C5T8;H7C4U7;H7C535;Q96QZ7-4;Q96QZ7-3;Q96QZ7-5;V9P4H4;Q96QZ7-7;Q96QZ7-6;Q96QZ7-2;Q96QZ7	Membrane-associated guanylate kinase, WW and PDZ domain-containing protein 3	MAGI3	>sp|Q5TCQ9-4|MAGI3_HUMAN Isoform 4 of Membrane-associated guanylate kinase, WW and PDZ domain-containing protein 3 OS=Homo sapiens GN=MAGI3;>sp|Q5TCQ9|MAGI3_HUMAN Membrane-associated guanylate kinase, WW and PDZ domain-containing protein 3 OS=Homo sapiens	1.1011	4	1.0115	NaN	0.64075	0.988631		NaN		1.56067	+	1	1.27465
O15269;A0A024R277;Q6NUL7;O15269-2;B4DR90;Q59EQ4	Serine palmitoyltransferase 1	SPTLC1	>sp|O15269|SPTC1_HUMAN Serine palmitoyltransferase 1 OS=Homo sapiens GN=SPTLC1 PE=1 SV=1;>tr|A0A024R277|A0A024R277_HUMAN Serine palmitoyltransferase, long chain base subunit 1, isoform CRA_a OS=Homo sapiens GN=SPTLC1 PE=4 SV=1;>tr|Q6NUL7|Q6NUL7_HUMAN SPTLC	1.1016	3	NaN	1.8104	NaN	NaN		0.552364	+	NaN		1	0.552364
Q9H0H5;B2RE34;A0A024R136;F8VRD2;F8VWY4;F8VUW9;F8VV39;F8VQZ5;F8VS54;F8VWX0;F8W0L1;F8VZ66;F8VV37;F8VV47;F8VVE5;H0YIK5;F8VVY0;F8VXH1;F8VYH6;F8W1T4;F8W1E5;Q9H9L9;Q9BZ74	Rac GTPase-activating protein 1	RACGAP1	>sp|Q9H0H5|RGAP1_HUMAN Rac GTPase-activating protein 1 OS=Homo sapiens GN=RACGAP1 PE=1 SV=1;>tr|B2RE34|B2RE34_HUMAN cDNA, FLJ96901, highly similar to Homo sapiens Rac GTPase activating protein 1 (RACGAP1), mRNA OS=Homo sapiens PE=2 SV=1;>tr|A0A024R136|A0A0	1.1021	4	2.1671	1.0438	1.1021	0.461446	+	0.958038		0.907359		1	0.907359
Q96AY4;B0QYP4;B0QYP5	Tetratricopeptide repeat protein 28	TTC28	>sp|Q96AY4|TTC28_HUMAN Tetratricopeptide repeat protein 28 OS=Homo sapiens GN=TTC28 PE=1 SV=4	1.1025	12	1.0965	4.2877	1.1497	0.911993		0.233225	+	0.869792		1	0.869792
Q08257;C9JH92;A6NP24;Q08257-3;Q08257-2	Quinone oxidoreductase	CRYZ	>sp|Q08257|QOR_HUMAN Quinone oxidoreductase OS=Homo sapiens GN=CRYZ PE=1 SV=1;>tr|C9JH92|C9JH92_HUMAN Quinone oxidoreductase (Fragment) OS=Homo sapiens GN=CRYZ PE=1 SV=1;>tr|A6NP24|A6NP24_HUMAN Quinone oxidoreductase (Fragment) OS=Homo sapiens GN=CRYZ PE=1	1.1039	11	0.99506	1.3552	1.1039	1.00496		0.737898	+	0.905879		1	0.905879
O43663;A0A024RC67;O43663-3;F8W9B5;O43663-2;O43663-4;H0YL53;H0YLA0;H0YM42;G3V3N7	Protein regulator of cytokinesis 1	PRC1	>sp|O43663|PRC1_HUMAN Protein regulator of cytokinesis 1 OS=Homo sapiens GN=PRC1 PE=1 SV=2;>tr|A0A024RC67|A0A024RC67_HUMAN Protein regulator of cytokinesis 1, isoform CRA_e OS=Homo sapiens GN=PRC1 PE=4 SV=1;>sp|O43663-3|PRC1_HUMAN Isoform 3 of Protein regu	1.1047	7	NaN	1.2146	0.62091	NaN		0.823316		1.61054	+	1	1.21693
Q9NW64-2;F5GWK3;Q9NW64;E5RJW4	Pre-mRNA-splicing factor RBM22	RBM22	>sp|Q9NW64-2|RBM22_HUMAN Isoform 2 of Pre-mRNA-splicing factor RBM22 OS=Homo sapiens GN=RBM22;>tr|F5GWK3|F5GWK3_HUMAN Pre-mRNA-splicing factor RBM22 OS=Homo sapiens GN=RBM22 PE=1 SV=1;>sp|Q9NW64|RBM22_HUMAN Pre-mRNA-splicing factor RBM22 OS=Homo sapiens GN	1.105	3	NaN	2.2738	1.2575	NaN		0.439792	+	0.795229		1	0.617511
Q9NWY4;A8MVJ9	UPF0609 protein C4orf27	C4orf27	>sp|Q9NWY4|CD027_HUMAN UPF0609 protein C4orf27 OS=Homo sapiens GN=C4orf27 PE=1 SV=2	1.1053	6	1.026	1.0812	1.7576	0.974659		0.924898		0.568958	+	1	0.924898
Q9Y4K4;B2R928;B3KWC4;D3DSB5	Mitogen-activated protein kinase kinase kinase kinase 5;Mitogen-activated protein kinase kinase kinase kinase	MAP4K5	>sp|Q9Y4K4|M4K5_HUMAN Mitogen-activated protein kinase kinase kinase kinase 5 OS=Homo sapiens GN=MAP4K5 PE=1 SV=1;>tr|B2R928|B2R928_HUMAN Mitogen-activated protein kinase kinase kinase kinase OS=Homo sapiens PE=2 SV=1;>tr|B3KWC4|B3KWC4_HUMAN cDNA FLJ42748	1.1055	5	1.0538	1.085	1.4109	0.948947		0.921659		0.708767	+	1	0.921659
E7ETU5;P29558-2;P29558;B4DN88;E7EPF2;D3DPB2;Q9UEK5;C9J9B2;Q5CZ65;Q5CZ66;Q6XE24-3;Q6XE24-4;Q6XE24-5;Q6XE24-2;J3QT21;C9JIJ9;Q6XE24;B4E2S3	RNA-binding motif, single-stranded-interacting protein 1	RBMS1	>tr|E7ETU5|E7ETU5_HUMAN RNA-binding motif, single-stranded-interacting protein 1 OS=Homo sapiens GN=RBMS1 PE=1 SV=1;>sp|P29558-2|RBMS1_HUMAN Isoform 2 of RNA-binding motif, single-stranded-interacting protein 1 OS=Homo sapiens GN=RBMS1;>sp|P29558|RBMS1_HUM	1.1081	4	0.94925	NaN	1.7727	1.05346		NaN		0.564111	+	1	0.808787
P36639-4;A0A024R819;P36639-3;P36639-2;A0A024R858;P36639	7,8-dihydro-8-oxoguanine triphosphatase	NUDT1	>sp|P36639-4|8ODP_HUMAN Isoform p18 of 7,8-dihydro-8-oxoguanine triphosphatase OS=Homo sapiens GN=NUDT1;>tr|A0A024R819|A0A024R819_HUMAN Nudix (Nucleoside diphosphate linked moiety X)-type motif 1, isoform CRA_a OS=Homo sapiens GN=NUDT1 PE=3 SV=1;>sp|P36639	1.1085	3	NaN	0.68067	1.1999	NaN		1.46914	+	0.833403		1	1.15127
H0YJN9;G3V2T4;G3V4E4;Q86TV2;Q86TV3;B7Z4S8;Q99538;Q6I9U9;Q53XC6;A8K669	Legumain	LGMN	>tr|H0YJN9|H0YJN9_HUMAN Legumain (Fragment) OS=Homo sapiens GN=LGMN PE=1 SV=1;>tr|G3V2T4|G3V2T4_HUMAN Legumain (Fragment) OS=Homo sapiens GN=LGMN PE=1 SV=1;>tr|G3V4E4|G3V4E4_HUMAN Legumain OS=Homo sapiens GN=LGMN PE=1 SV=1;>tr|Q86TV2|Q86TV2_HUMAN Full-leng	1.1087	3	1.0619	1.408	1.2334	0.941708		0.710227	+	0.810767		1	0.810767
P55011-3;Q53ZR1;P55011;G3XAL9;B7ZM24	Solute carrier family 12 member 2	SLC12A2	>sp|P55011-3|S12A2_HUMAN Isoform 2 of Solute carrier family 12 member 2 OS=Homo sapiens GN=SLC12A2;>tr|Q53ZR1|Q53ZR1_HUMAN Bumetanide-sensitive Na-K-Cl cotransporter OS=Homo sapiens GN=SLC12A2 PE=2 SV=1;>sp|P55011|S12A2_HUMAN Solute carrier family 12 membe	1.1088	3	0.92183	1.3717	NaN	1.0848		0.729022	+	NaN		1	0.906911
A3KN83-3;A3KN83-2;A3KN83;B3KUC1;Q9NVJ3;B4DV91;A3KN83-4;B4DL53;Q9Y2G9-3;K7ES28;Q9Y2G9	Protein strawberry notch homolog 1	SBNO1	>sp|A3KN83-3|SBNO1_HUMAN Isoform 3 of Protein strawberry notch homolog 1 OS=Homo sapiens GN=SBNO1;>sp|A3KN83-2|SBNO1_HUMAN Isoform 2 of Protein strawberry notch homolog 1 OS=Homo sapiens GN=SBNO1;>sp|A3KN83|SBNO1_HUMAN Protein strawberry notch homolog 1 OS	1.1096	5	1.4325	1.0643	1.0667	0.69808	+	0.939585		0.937471		1	0.937471
P48637-2;V9HWJ1;P48637;B7Z514;B7Z1C5	Glutathione synthetase	GSS	>sp|P48637-2|GSHB_HUMAN Isoform 2 of Glutathione synthetase OS=Homo sapiens GN=GSS;>tr|V9HWJ1|V9HWJ1_HUMAN Epididymis secretory sperm binding protein Li 64p OS=Homo sapiens GN=HEL-S-64p PE=2 SV=1;>sp|P48637|GSHB_HUMAN Glutathione synthetase OS=Homo sapiens	1.1101	10	1.4673	0.97868	1.2009	0.681524	+	1.02178		0.832709		1	0.832709
P31350;P31350-2;D6W4Z6;C9JXC1;B3KS26;Q8N6S3;Q9UKM0	Ribonucleoside-diphosphate reductase subunit M2	RRM2;hCG_23833	>sp|P31350|RIR2_HUMAN Ribonucleoside-diphosphate reductase subunit M2 OS=Homo sapiens GN=RRM2 PE=1 SV=1;>sp|P31350-2|RIR2_HUMAN Isoform 2 of Ribonucleoside-diphosphate reductase subunit M2 OS=Homo sapiens GN=RRM2;>tr|D6W4Z6|D6W4Z6_HUMAN HCG23833, isoform C	1.1119	23	1.0453	1.0897	1.519	0.956663		0.917684		0.658328	+	1	0.917684
Q9H8M5-3;Q6P4Q7;Q9H8M5-2;Q9H8M5	Metal transporter CNNM2;Metal transporter CNNM4	CNNM2;CNNM4	>sp|Q9H8M5-3|CNNM2_HUMAN Isoform 3 of Metal transporter CNNM2 OS=Homo sapiens GN=CNNM2;>sp|Q6P4Q7|CNNM4_HUMAN Metal transporter CNNM4 OS=Homo sapiens GN=CNNM4 PE=1 SV=3;>sp|Q9H8M5-2|CNNM2_HUMAN Isoform 2 of Metal transporter CNNM2 OS=Homo sapiens GN=CNNM2;	1.1132	5	1.0118	0.76278	NaN	0.988338		1.31099	+	NaN		1	1.14967
Q5U079;Q53HP8;P17275	Transcription factor jun-B	JUNB	>tr|Q5U079|Q5U079_HUMAN Jun B proto-oncogene OS=Homo sapiens GN=JUNB PE=2 SV=1;>tr|Q53HP8|Q53HP8_HUMAN Jun B proto-oncogene variant (Fragment) OS=Homo sapiens PE=2 SV=1;>sp|P17275|JUNB_HUMAN Transcription factor jun-B OS=Homo sapiens GN=JUNB PE=1 SV=1	1.1152	4	NaN	NaN	1.5146	NaN		NaN		0.66024	+	1	0.66024
K7EPQ7;Q5BJH7-2;K7EJQ6;Q5BJH7-6;Q5BJH7-3;Q5BJH7	Protein YIF1B	YIF1B	>tr|K7EPQ7|K7EPQ7_HUMAN Protein YIF1B OS=Homo sapiens GN=YIF1B PE=1 SV=1;>sp|Q5BJH7-2|YIF1B_HUMAN Isoform 2 of Protein YIF1B OS=Homo sapiens GN=YIF1B;>tr|K7EJQ6|K7EJQ6_HUMAN Protein YIF1B (Fragment) OS=Homo sapiens GN=YIF1B PE=1 SV=1;>sp|Q5BJH7-6|YIF1B_HUM	1.1163	3	0.85483	1.1163	1.4586	1.16982		0.895817		0.685589	+	1	0.895817
Q8NE01-2;Q8NE01-3;Q8NE01	Metal transporter CNNM3	CNNM3	>sp|Q8NE01-2|CNNM3_HUMAN Isoform 2 of Metal transporter CNNM3 OS=Homo sapiens GN=CNNM3;>sp|Q8NE01-3|CNNM3_HUMAN Isoform 3 of Metal transporter CNNM3 OS=Homo sapiens GN=CNNM3;>sp|Q8NE01|CNNM3_HUMAN Metal transporter CNNM3 OS=Homo sapiens GN=CNNM3 PE=1 SV=1	1.1176	4	1.0044	0.62314	NaN	0.995619		1.60478	+	NaN		1	1.3002
Q9ULH0-2;Q9ULH0-4;Q9ULH0;H0Y8E4;E9PH70;B4DGY1;B4DK94;Q9ULH0-3;Q9ULH0-5;B4DI12;B4DG84;Q7Z322;H7C584	Kinase D-interacting substrate of 220 kDa	KIDINS220	>sp|Q9ULH0-2|KDIS_HUMAN Isoform 2 of Kinase D-interacting substrate of 220 kDa OS=Homo sapiens GN=KIDINS220;>sp|Q9ULH0-4|KDIS_HUMAN Isoform 4 of Kinase D-interacting substrate of 220 kDa OS=Homo sapiens GN=KIDINS220;>sp|Q9ULH0|KDIS_HUMAN Kinase D-interacti	1.1198	14	1.5645	1.0151	1.0323	0.639182	+	0.985125		0.968711		1	0.968711
Q9NVV4;Q5T851;Q5T852;Q9NVV4-2	Poly(A) RNA polymerase, mitochondrial	MTPAP	>sp|Q9NVV4|PAPD1_HUMAN Poly(A) RNA polymerase, mitochondrial OS=Homo sapiens GN=MTPAP PE=1 SV=1;>tr|Q5T851|Q5T851_HUMAN Poly(A) RNA polymerase, mitochondrial (Fragment) OS=Homo sapiens GN=MTPAP PE=1 SV=1;>tr|Q5T852|Q5T852_HUMAN Poly(A) RNA polymerase, mito	1.1199	4	1.1772	1.2342	1.4304	0.849473		0.810241		0.699105	+	1	0.810241
P62861;E9PR30	40S ribosomal protein S30	FAU	>sp|P62861|RS30_HUMAN 40S ribosomal protein S30 OS=Homo sapiens GN=FAU PE=1 SV=1;>tr|E9PR30|E9PR30_HUMAN 40S ribosomal protein S30 OS=Homo sapiens GN=FAU PE=1 SV=1	1.1214	6	1.3827	1.064	1.0774	0.723223	+	0.93985		0.92816		1	0.92816
Q14627;D0EFR8	Interleukin-13 receptor subunit alpha-2	IL13RA2	>sp|Q14627|I13R2_HUMAN Interleukin-13 receptor subunit alpha-2 OS=Homo sapiens GN=IL13RA2 PE=1 SV=1;>tr|D0EFR8|D0EFR8_HUMAN Interleukin-13 receptor alpha 2 variant OS=Homo sapiens GN=IL13RA2 PE=2 SV=1	1.1218	7	1.0279	1.8941	1.1218	0.972857		0.527955	+	0.891424		1	0.891424
Q07960;B4DPZ4;H0YE29;E9PNR6;O15376	Rho GTPase-activating protein 1	ARHGAP1	>sp|Q07960|RHG01_HUMAN Rho GTPase-activating protein 1 OS=Homo sapiens GN=ARHGAP1 PE=1 SV=1;>tr|B4DPZ4|B4DPZ4_HUMAN cDNA FLJ60782, highly similar to Rho-GTPase-activating protein 1 OS=Homo sapiens PE=2 SV=1;>tr|H0YE29|H0YE29_HUMAN Rho GTPase-activating pro	1.1237	10	1.4208	1.1752	1.1116	0.703829	+	0.850919		0.899604		1	0.850919
A0A024R8I2;Q9BSL1	Ubiquitin-associated domain-containing protein 1	UBAC1	>tr|A0A024R8I2|A0A024R8I2_HUMAN Ubiquitin associated domain containing 1, isoform CRA_c OS=Homo sapiens GN=UBADC1 PE=4 SV=1;>sp|Q9BSL1|UBAC1_HUMAN Ubiquitin-associated domain-containing protein 1 OS=Homo sapiens GN=UBAC1 PE=1 SV=1	1.125	4	1.1937	1.6527	NaN	0.837731		0.60507	+	NaN		1	0.721401
Q9NRF9;A0A024R829	DNA polymerase epsilon subunit 3	POLE3	>sp|Q9NRF9|DPOE3_HUMAN DNA polymerase epsilon subunit 3 OS=Homo sapiens GN=POLE3 PE=1 SV=1;>tr|A0A024R829|A0A024R829_HUMAN Polymerase (DNA directed), epsilon 3 (P17 subunit), isoform CRA_a OS=Homo sapiens GN=POLE3 PE=4 SV=1	1.1255	10	1.0469	1.3191	0.8475	0.955201		0.758093	+	1.17994		1	0.955201
Q149P1;Q149P0;Q92538;Q05BW6;Q504U7	Golgi-specific brefeldin A-resistance guanine nucleotide exchange factor 1	GBF1	>tr|Q149P1|Q149P1_HUMAN GBF1 protein OS=Homo sapiens GN=GBF1 PE=2 SV=1;>tr|Q149P0|Q149P0_HUMAN GBF1 protein OS=Homo sapiens GN=GBF1 PE=2 SV=1;>sp|Q92538|GBF1_HUMAN Golgi-specific brefeldin A-resistance guanine nucleotide exchange factor 1 OS=Homo sapiens G	1.1276	6	1.175	NaN	1.3881	0.851064		NaN		0.720409	+	1	0.785737
U3KQF2			>tr|U3KQF2|U3KQF2_HUMAN ADP-ribosylation factor 4 OS=Homo sapiens GN=ARF4 PE=1 SV=1	1.1281	3	NaN	1.3529	NaN	NaN		0.739153	+	NaN		1	0.739153
Q96ME1-4;A0A024R857;B3KTC9;Q96ME1-2;H0Y6I6;F5H4Z4;B4DH63;Q96ME1;Q96ME1-3	F-box/LRR-repeat protein 18	FBXL18	>sp|Q96ME1-4|FXL18_HUMAN Isoform 4 of F-box/LRR-repeat protein 18 OS=Homo sapiens GN=FBXL18;>tr|A0A024R857|A0A024R857_HUMAN F-box and leucine-rich repeat protein 18, isoform CRA_b OS=Homo sapiens GN=FBXL18 PE=4 SV=1;>tr|B3KTC9|B3KTC9_HUMAN cDNA FLJ38075 fi	1.13	4	1.031	1.4804	1.0705	0.969932		0.675493	+	0.934143		1	0.934143
Q5T179;Q5T178;P61024;D3DV79;Q9BZU3	Cyclin-dependent kinases regulatory subunit 1	CKS1B	>tr|Q5T179|Q5T179_HUMAN Cyclin-dependent kinases regulatory subunit OS=Homo sapiens GN=CKS1B PE=1 SV=1;>tr|Q5T178|Q5T178_HUMAN Cyclin-dependent kinases regulatory subunit OS=Homo sapiens GN=CKS1B PE=2 SV=1;>sp|P61024|CKS1_HUMAN Cyclin-dependent kinases reg	1.134	4	NaN	NaN	1.5126	NaN		NaN		0.661113	+	1	0.661113
Q53QE9;Q16851-2;Q16851;B2RAN1;E7EUC7;B4DUP2;C9JVG3;C9JQU9;C9JNZ1;C9JWG0;D6W5E6;C9JTZ5;C9JUW1	UTP--glucose-1-phosphate uridylyltransferase	UGP2	>tr|Q53QE9|Q53QE9_HUMAN Putative uncharacterized protein UGP2 (Fragment) OS=Homo sapiens GN=UGP2 PE=4 SV=1;>sp|Q16851-2|UGPA_HUMAN Isoform 2 of UTP--glucose-1-phosphate uridylyltransferase OS=Homo sapiens GN=UGP2;>sp|Q16851|UGPA_HUMAN UTP--glucose-1-phosph	1.137	13	1.1642	0.67098	1.1854	0.858959		1.49036	+	0.843597		1	0.858959
B4DIZ6;Q96DE0-3;Q96DE0	U8 snoRNA-decapping enzyme	NUDT16	>tr|B4DIZ6|B4DIZ6_HUMAN cDNA FLJ57941, highly similar to Nucleoside diphosphate-linked moiety X motif16 (EC 3.6.1.-) OS=Homo sapiens PE=2 SV=1;>sp|Q96DE0-3|NUD16_HUMAN Isoform 3 of U8 snoRNA-decapping enzyme OS=Homo sapiens GN=NUDT16;>sp|Q96DE0|NUD16_HUMAN	1.1371	6	1.061	1.1371	1.4277	0.942507		0.87943		0.700427	+	1	0.87943
Q6IQ22	Ras-related protein Rab-12	RAB12	>sp|Q6IQ22|RAB12_HUMAN Ras-related protein Rab-12 OS=Homo sapiens GN=RAB12 PE=1 SV=3	1.138	6	0.35006	1.3	1.138	2.85665	+	0.769231		0.878735		1	0.878735
Q6PID6	Tetratricopeptide repeat protein 33	TTC33	>sp|Q6PID6|TTC33_HUMAN Tetratricopeptide repeat protein 33 OS=Homo sapiens GN=TTC33 PE=1 SV=2	1.1418	4	3.1	NaN	1.0763	0.322581	+	NaN		0.929109		1	0.625845
Q8IYB8;B7Z611	ATP-dependent RNA helicase SUPV3L1, mitochondrial	SUPV3L1	>sp|Q8IYB8|SUV3_HUMAN ATP-dependent RNA helicase SUPV3L1, mitochondrial OS=Homo sapiens GN=SUPV3L1 PE=1 SV=1;>tr|B7Z611|B7Z611_HUMAN cDNA FLJ50848, highly similar to Homo sapiens suppressor of var1, 3-like 1 (S. cerevisiae) (SUPV3L1), mRNA (Fragment) OS=Ho	1.1431	6	1.0828	1.5967	1.3286	0.923532		0.626292	+	0.752672		1	0.752672
Q8N8J5;F2Z2Y8;Q9H0E2;Q6FIE9;E9PNS3;B3KR28;E9PP67;E9PQ25;B3KXC6;E7EN89	Toll-interacting protein	TOLLIP	>tr|Q8N8J5|Q8N8J5_HUMAN cDNA FLJ39374 fis, clone PEBLM2008576, highly similar to Homo sapiens TOLLIP protein OS=Homo sapiens PE=2 SV=1;>tr|F2Z2Y8|F2Z2Y8_HUMAN Toll-interacting protein OS=Homo sapiens GN=TOLLIP PE=1 SV=1;>sp|Q9H0E2|TOLIP_HUMAN Toll-interact	1.1472	5	14.305	1.2153	NaN	0.0699056	+	0.822842		NaN		1	0.446374
O60361	Putative nucleoside diphosphate kinase	NME2P1	>sp|O60361|NDK8_HUMAN Putative nucleoside diphosphate kinase OS=Homo sapiens GN=NME2P1 PE=5 SV=1	1.1485	3	NaN	1.6055	NaN	NaN		0.622859	+	NaN		1	0.622859
Q9Y6Q1;B2R6T2;F5GWQ6;B4DTS3	Calpain-6	CAPN6	>sp|Q9Y6Q1|CAN6_HUMAN Calpain-6 OS=Homo sapiens GN=CAPN6 PE=1 SV=2;>tr|B2R6T2|B2R6T2_HUMAN cDNA, FLJ93100, highly similar to Homo sapiens calpain 6 (CAPN6), mRNA OS=Homo sapiens PE=2 SV=1;>tr|F5GWQ6|F5GWQ6_HUMAN Calpain-6 OS=Homo sapiens GN=CAPN6 PE=4 SV=1	1.1529	6	1.3246	1.582	1.2273	0.754945		0.632111	+	0.814797		1	0.754945
B4DRU9;Q9NUQ8-2;Q9NUQ8	ATP-binding cassette sub-family F member 3	ABCF3	>tr|B4DRU9|B4DRU9_HUMAN cDNA FLJ57179, highly similar to Homo sapiens ATP-binding cassette, sub-family F (GCN20), member 3 (ABCF3), mRNA OS=Homo sapiens PE=2 SV=1;>sp|Q9NUQ8-2|ABCF3_HUMAN Isoform 2 of ATP-binding cassette sub-family F member 3 OS=Homo sapi	1.1535	7	NaN	1.1027	1.6334	NaN		0.906865		0.61222	+	1	0.759542
O14686;O14686-3	Histone-lysine N-methyltransferase 2D	KMT2D	>sp|O14686|KMT2D_HUMAN Histone-lysine N-methyltransferase 2D OS=Homo sapiens GN=KMT2D PE=1 SV=2;>sp|O14686-3|KMT2D_HUMAN Isoform 3 of Histone-lysine N-methyltransferase 2D OS=Homo sapiens GN=KMT2D	1.1575	3	NaN	1.4123	NaN	NaN		0.708065	+	NaN		1	0.708065
Q8IY37;F5H3Y4	Probable ATP-dependent RNA helicase DHX37	DHX37	>sp|Q8IY37|DHX37_HUMAN Probable ATP-dependent RNA helicase DHX37 OS=Homo sapiens GN=DHX37 PE=1 SV=1;>tr|F5H3Y4|F5H3Y4_HUMAN Probable ATP-dependent RNA helicase DHX37 OS=Homo sapiens GN=DHX37 PE=1 SV=1	1.1613	6	0.97178	1.3879	NaN	1.02904		0.720513	+	NaN		1	0.874776
F8W922;Q9H7P6-2;G8JLL7;B7Z1P9;Q9H7P6;A0A024R8B8;B7Z4X0;Q9H7N7	Multivesicular body subunit 12B	MVB12B	>tr|F8W922|F8W922_HUMAN Multivesicular body subunit 12B (Fragment) OS=Homo sapiens GN=MVB12B PE=4 SV=1;>sp|Q9H7P6-2|MB12B_HUMAN Isoform 2 of Multivesicular body subunit 12B OS=Homo sapiens GN=MVB12B;>tr|G8JLL7|G8JLL7_HUMAN Multivesicular body subunit 12B O	1.1624	7	1.0139	1.7161	NaN	0.986291		0.582717	+	NaN		1	0.784504
Q99816-2;F5H442;Q99816;D3DQY6;Q86SI0;L0L6B6	Tumor susceptibility gene 101 protein	TSG101	>sp|Q99816-2|TS101_HUMAN Isoform 2 of Tumor susceptibility gene 101 protein OS=Homo sapiens GN=TSG101;>tr|F5H442|F5H442_HUMAN Tumor susceptibility gene 101 protein OS=Homo sapiens GN=TSG101 PE=1 SV=1;>sp|Q99816|TS101_HUMAN Tumor susceptibility gene 101 pro	1.1642	7	1.3691	1.1104	1.1642	0.730407	+	0.900576		0.858959		1	0.858959
B3KS18;B4DDX1;B3KQ71;B4DWL6;Q9H4A6	Golgi phosphoprotein 3	GOLPH3	>tr|B3KS18|B3KS18_HUMAN cDNA FLJ35285 fis, clone PROST2008079, highly similar to Golgi phosphoprotein 3 OS=Homo sapiens PE=2 SV=1;>tr|B4DDX1|B4DDX1_HUMAN cDNA FLJ54589, highly similar to Golgi phosphoprotein 3 OS=Homo sapiens PE=2 SV=1;>tr|B3KQ71|B3KQ71_HU	1.1642	4	NaN	NaN	0.65839	NaN		NaN		1.51886	+	1	1.51886
P54098;E5KNX5;E5KNW2;E5KNU5;A8K5G6;E5KNV8;H0YD36;H0YCV2	DNA polymerase subunit gamma-1	POLG	>sp|P54098|DPOG1_HUMAN DNA polymerase subunit gamma-1 OS=Homo sapiens GN=POLG PE=1 SV=1;>tr|E5KNX5|E5KNX5_HUMAN DNA polymerase subunit gamma-1 OS=Homo sapiens PE=3 SV=1;>tr|E5KNW2|E5KNW2_HUMAN DNA polymerase subunit gamma-1 OS=Homo sapiens PE=3 SV=1;>tr|E5	1.1656	5	0.98901	1.5341	NaN	1.01111		0.651848	+	NaN		1	0.83148
F5H355;Q15276;K7ENJ9;Q05BX6;B4DMM4;Q15276-2	Rab GTPase-binding effector protein 1	RABEP1	>tr|F5H355|F5H355_HUMAN Rab GTPase-binding effector protein 1 OS=Homo sapiens GN=RABEP1 PE=1 SV=1;>sp|Q15276|RABE1_HUMAN Rab GTPase-binding effector protein 1 OS=Homo sapiens GN=RABEP1 PE=1 SV=2;>tr|K7ENJ9|K7ENJ9_HUMAN Rab GTPase-binding effector protein 1	1.1681	5	1.215	1.1681	0.47742	0.823045		0.856091		2.09459	+	1	0.856091
Q9Y287;Q9NX12;Q9Y287-2;Q7Z528	Integral membrane protein 2B;BRI2, membrane form;BRI2 intracellular domain;BRI2C, soluble form;Bri23 peptide	ITM2B	>sp|Q9Y287|ITM2B_HUMAN Integral membrane protein 2B OS=Homo sapiens GN=ITM2B PE=1 SV=1;>tr|Q9NX12|Q9NX12_HUMAN cDNA FLJ20496 fis, clone KAT08729 OS=Homo sapiens PE=2 SV=1;>sp|Q9Y287-2|ITM2B_HUMAN Isoform 2 of Integral membrane protein 2B OS=Homo sapiens GN	1.1705	5	1.1186	1.3038	1.4309	0.893975		0.766989		0.698861	+	1	0.766989
Q8WU79-3;Q8WU79-2;Q8WU79;B7Z2F9	Stromal membrane-associated protein 2	SMAP2	>sp|Q8WU79-3|SMAP2_HUMAN Isoform 3 of Stromal membrane-associated protein 2 OS=Homo sapiens GN=SMAP2;>sp|Q8WU79-2|SMAP2_HUMAN Isoform 2 of Stromal membrane-associated protein 2 OS=Homo sapiens GN=SMAP2;>sp|Q8WU79|SMAP2_HUMAN Stromal membrane-associated pro	1.1719	4	NaN	1.1728	1.4598	NaN		0.85266		0.685025	+	1	0.768843
D6RCD0;Q8NBQ5	Estradiol 17-beta-dehydrogenase 11	HSD17B11	>tr|D6RCD0|D6RCD0_HUMAN Estradiol 17-beta-dehydrogenase 11 OS=Homo sapiens GN=HSD17B11 PE=1 SV=1;>sp|Q8NBQ5|DHB11_HUMAN Estradiol 17-beta-dehydrogenase 11 OS=Homo sapiens GN=HSD17B11 PE=1 SV=3	1.1797	18	1.1425	1.4031	1.1542	0.875274		0.712708	+	0.866401		1	0.866401
A2A3R5	40S ribosomal protein S6	RPS6	>tr|A2A3R5|A2A3R5_HUMAN 40S ribosomal protein S6 OS=Homo sapiens GN=RPS6 PE=1 SV=1	1.1856	4	NaN	NaN	1.4655	NaN		NaN		0.682361	+	1	0.682361
Q86V21-2;Q86V21;A0A024RBV2;F5H790;E7EW25;B4E296;Q49AJ4;F5GWW7;F8W8B5;Q86V21-3	Acetoacetyl-CoA synthetase	AACS	>sp|Q86V21-2|AACS_HUMAN Isoform 2 of Acetoacetyl-CoA synthetase OS=Homo sapiens GN=AACS;>sp|Q86V21|AACS_HUMAN Acetoacetyl-CoA synthetase OS=Homo sapiens GN=AACS PE=1 SV=1;>tr|A0A024RBV2|A0A024RBV2_HUMAN Acetoacetyl-CoA synthetase, isoform CRA_b OS=Homo sap	1.1905	6	1.2467	1.4018	0.88529	0.802118		0.713369	+	1.12957		1	0.802118
Q15397;B2RDG4;S4R3K8	Pumilio domain-containing protein KIAA0020	KIAA0020	>sp|Q15397|K0020_HUMAN Pumilio domain-containing protein KIAA0020 OS=Homo sapiens GN=KIAA0020 PE=1 SV=3;>tr|B2RDG4|B2RDG4_HUMAN cDNA, FLJ96597 OS=Homo sapiens PE=2 SV=1	1.1919	14	1.2356	1.5726	1.1594	0.809323		0.63589	+	0.862515		1	0.809323
J3QT87;Q96SW2-2;Q96SW2;A0A024R2H8;B4DW89	Protein cereblon	CRBN	>tr|J3QT87|J3QT87_HUMAN Protein cereblon (Fragment) OS=Homo sapiens GN=CRBN PE=4 SV=1;>sp|Q96SW2-2|CRBN_HUMAN Isoform 2 of Protein cereblon OS=Homo sapiens GN=CRBN;>sp|Q96SW2|CRBN_HUMAN Protein cereblon OS=Homo sapiens GN=CRBN PE=1 SV=1;>tr|A0A024R2H8|A0A0	1.1935	5	1.3566	NaN	1.8189	0.737137		NaN		0.549783	+	1	0.64346
E9PDL4;Q05084-3;Q05084;A0A024RA29;Q05084-2;B9ZVM7;Q6LCR0;E7ENI6	Islet cell autoantigen 1	ICA1	>tr|E9PDL4|E9PDL4_HUMAN Islet cell autoantigen 1 OS=Homo sapiens GN=ICA1 PE=4 SV=1;>sp|Q05084-3|ICA69_HUMAN Isoform 3 of Islet cell autoantigen 1 OS=Homo sapiens GN=ICA1;>sp|Q05084|ICA69_HUMAN Islet cell autoantigen 1 OS=Homo sapiens GN=ICA1 PE=1 SV=2;>tr|	1.1941	3	NaN	1.2476	4.64	NaN		0.801539		0.215517	+	1	0.508528
Q5VW32-2;Q5VW32;Q5VW33;F5GXQ0;B7Z953;B7Z1V1	BRO1 domain-containing protein BROX	BROX	>sp|Q5VW32-2|BROX_HUMAN Isoform 2 of BRO1 domain-containing protein BROX OS=Homo sapiens GN=BROX;>sp|Q5VW32|BROX_HUMAN BRO1 domain-containing protein BROX OS=Homo sapiens GN=BROX PE=1 SV=1;>tr|Q5VW33|Q5VW33_HUMAN BRO1 domain-containing protein BROX (Fragme	1.1996	3	NaN	1.4728	NaN	NaN		0.678979	+	NaN		1	0.678979
Q9UK41;Q548N1;E9PQR7;Q9UK41-2;E9PR04;E9PI55;E9PM90;E9PLM9	Vacuolar protein sorting-associated protein 28 homolog	VPS28	>sp|Q9UK41|VPS28_HUMAN Vacuolar protein sorting-associated protein 28 homolog OS=Homo sapiens GN=VPS28 PE=1 SV=1;>tr|Q548N1|Q548N1_HUMAN Vacuolar protein sorting 28 (Yeast), isoform CRA_a OS=Homo sapiens GN=VPS28 PE=2 SV=1;>tr|E9PQR7|E9PQR7_HUMAN Vacuolar	1.2003	6	1.151	1.3715	1.08	0.86881		0.729129	+	0.925926		1	0.86881
Q9BWD1;A8K4W5;Q59GW6;B7Z233	Acetyl-CoA acetyltransferase, cytosolic	ACAT2	>sp|Q9BWD1|THIC_HUMAN Acetyl-CoA acetyltransferase, cytosolic OS=Homo sapiens GN=ACAT2 PE=1 SV=2;>tr|A8K4W5|A8K4W5_HUMAN cDNA FLJ76813, highly similar to Homo sapiens acetyl-Coenzyme A acetyltransferase 2 (acetoacetyl Coenzyme A thiolase), mRNA OS=Homo sap	1.2035	4	3.0265	1.2009	1.0575	0.330415	+	0.832709		0.945626		1	0.832709
Q6GMV3	Putative peptidyl-tRNA hydrolase PTRHD1	PTRHD1	>sp|Q6GMV3|PTRD1_HUMAN Putative peptidyl-tRNA hydrolase PTRHD1 OS=Homo sapiens GN=PTRHD1 PE=1 SV=1	1.2067	4	1.0692	1.3374	NaN	0.935279		0.747719	+	NaN		1	0.841499
Q9Y376;Q7Z4X0;A0A024R496	Calcium-binding protein 39	CAB39	>sp|Q9Y376|CAB39_HUMAN Calcium-binding protein 39 OS=Homo sapiens GN=CAB39 PE=1 SV=1;>tr|Q7Z4X0|Q7Z4X0_HUMAN MO25-like protein OS=Homo sapiens PE=2 SV=1;>tr|A0A024R496|A0A024R496_HUMAN Calcium binding protein 39, isoform CRA_a OS=Homo sapiens GN=CAB39 PE=4	1.2121	7	1.2121	1.3509	1.2004	0.825014		0.740247	+	0.833056		1	0.825014
Q9BWH2;H7C0K8	FUN14 domain-containing protein 2	FUNDC2	>sp|Q9BWH2|FUND2_HUMAN FUN14 domain-containing protein 2 OS=Homo sapiens GN=FUNDC2 PE=1 SV=2	1.214	5	1.2184	1.0844	1.4305	0.820749		0.922169		0.699056	+	1	0.820749
Q9NRY5;I6L9D5;B3KTE4;E7ESJ7;B4DQT0;B4E1J2;E5RK42;E5RHP2;E5RHI8;E5RFK2;E5RGF9	Protein FAM114A2	FAM114A2	>sp|Q9NRY5|F1142_HUMAN Protein FAM114A2 OS=Homo sapiens GN=FAM114A2 PE=1 SV=4;>tr|I6L9D5|I6L9D5_HUMAN FAM114A2 protein OS=Homo sapiens GN=FAM114A2 PE=2 SV=1;>tr|B3KTE4|B3KTE4_HUMAN cDNA FLJ38127 fis, clone D6OST2000245 OS=Homo sapiens PE=2 SV=1;>tr|E7ESJ7|	1.2144	9	1.1101	1.2588	1.4062	0.90082		0.794407		0.711136	+	1	0.794407
Q13492-3;B5BU72;A0A024R5L7;Q13492-2;Q13492-5;Q13492;A8K5U9;A0A024R5P1;Q13492-4;E9PI56;E9PKP6;E9PLJ8;Q8N6B4;H0YE97;H0YEY8;B4DLM1;H0YCY1;H0YD48;H0YEF7;H0YEH1;E9PJT1;E9PK13;E5RFU0;E5RHK9;E5RFC6;E5RK51;E5RIJ5	Phosphatidylinositol-binding clathrin assembly protein	PICALM	>sp|Q13492-3|PICAL_HUMAN Isoform 3 of Phosphatidylinositol-binding clathrin assembly protein OS=Homo sapiens GN=PICALM;>tr|B5BU72|B5BU72_HUMAN Phosphatidylinositol-binding clathrin assembly protein isoform 2 OS=Homo sapiens GN=PICALM PE=2 SV=1;>tr|A0A024R5	1.2159	20	1.1362	1.3924	0.82501	0.880127		0.718184	+	1.21211		1	0.880127
B4DWM8;Q8NF19;B3KR70;Q15904;A6NLC6	V-type proton ATPase subunit S1	FLJ00383;ATP6AP1	>tr|B4DWM8|B4DWM8_HUMAN cDNA FLJ56259, highly similar to Vacuolar ATP synthase subunit S1 (EC 3.6.3.14) OS=Homo sapiens PE=2 SV=1;>tr|Q8NF19|Q8NF19_HUMAN FLJ00383 protein (Fragment) OS=Homo sapiens GN=FLJ00383 PE=2 SV=1;>tr|B3KR70|B3KR70_HUMAN cDNA FLJ3376	1.217	6	1.0811	1.3936	NaN	0.924984		0.717566	+	NaN		1	0.821275
Q9Y613;B4E2D9;B4DVN5;B4E2Z4;H3BVE7	FH1/FH2 domain-containing protein 1	FHOD1	>sp|Q9Y613|FHOD1_HUMAN FH1/FH2 domain-containing protein 1 OS=Homo sapiens GN=FHOD1 PE=1 SV=3	1.2189	12	1.2189	1.3741	1.0924	0.820412		0.727749	+	0.915416		1	0.820412
Q9UJX5;E9PCR4;B3KN47;D6RAP6;Q9UJX5-2	Anaphase-promoting complex subunit 4	ANAPC4	>sp|Q9UJX5|APC4_HUMAN Anaphase-promoting complex subunit 4 OS=Homo sapiens GN=ANAPC4 PE=1 SV=2;>tr|E9PCR4|E9PCR4_HUMAN Anaphase-promoting complex subunit 4 OS=Homo sapiens GN=ANAPC4 PE=1 SV=1;>tr|B3KN47|B3KN47_HUMAN cDNA FLJ13535 fis, clone PLACE1006506, h	1.2222	3	NaN	NaN	1.6298	NaN		NaN		0.613572	+	1	0.613572
Q9H6T3-2;Q9H6T3;Q9H6T3-3	RNA polymerase II-associated protein 3	RPAP3	>sp|Q9H6T3-2|RPAP3_HUMAN Isoform 2 of RNA polymerase II-associated protein 3 OS=Homo sapiens GN=RPAP3;>sp|Q9H6T3|RPAP3_HUMAN RNA polymerase II-associated protein 3 OS=Homo sapiens GN=RPAP3 PE=1 SV=2;>sp|Q9H6T3-3|RPAP3_HUMAN Isoform 3 of RNA polymerase II-a	1.2222	3	1.2222	NaN	1.9561	0.818197		NaN		0.511221	+	1	0.664709
B9ZVT1;Q8IXT5;E5RJW8;E5RHG1;E5RJ83;E5RJV8	RNA-binding protein 12B	RBM12B	>tr|B9ZVT1|B9ZVT1_HUMAN RNA-binding protein 12B OS=Homo sapiens GN=RBM12B PE=1 SV=2;>sp|Q8IXT5|RB12B_HUMAN RNA-binding protein 12B OS=Homo sapiens GN=RBM12B PE=1 SV=2;>tr|E5RJW8|E5RJW8_HUMAN RNA-binding protein 12B (Fragment) OS=Homo sapiens GN=RBM12B PE=4	1.2248	5	0.94986	1.394	NaN	1.05279		0.71736	+	NaN		1	0.885073
Q14790-3;B6CGU5;Q14790-2;B5BU46;A0A024R3Z8;Q14790;Q14790-4;Q14790-9;E7ETB7;E7EQ06;Q14790-6;Q14790-5;H7C0E2;Q14790-8;Q14790-7;A0A024R3Z9;Q6NVI2;H7BZM4;C3S3G0;E7EQ01;E7EVN1;C9JB29;K4FGA0	Caspase-8;Caspase-8 subunit p18;Caspase-8 subunit p10	CASP8	>sp|Q14790-3|CASP8_HUMAN Isoform 3 of Caspase-8 OS=Homo sapiens GN=CASP8;>tr|B6CGU5|B6CGU5_HUMAN Caspase 8 splice variant OS=Homo sapiens GN=CASP8 PE=2 SV=1;>sp|Q14790-2|CASP8_HUMAN Isoform 2 of Caspase-8 OS=Homo sapiens GN=CASP8;>tr|B5BU46|B5BU46_HUMAN Ca	1.2249	3	NaN	1.3405	NaN	NaN		0.74599	+	NaN		1	0.74599
Q6NZ44;P02794;B3KXC3;A0A024R525;G3V1D1;G3V192;Q6NS36;E9PRK8;E9PKY7;Q8TD27;D3DPG2;A9JQE1;E9PQR3;E9PPQ4;E9PKM5;E9PK45	Ferritin;Ferritin heavy chain	FTH1	>tr|Q6NZ44|Q6NZ44_HUMAN Ferritin OS=Homo sapiens GN=FTH1 PE=2 SV=1;>sp|P02794|FRIH_HUMAN Ferritin heavy chain OS=Homo sapiens GN=FTH1 PE=1 SV=2;>tr|B3KXC3|B3KXC3_HUMAN Ferritin OS=Homo sapiens PE=2 SV=1;>tr|A0A024R525|A0A024R525_HUMAN Ferritin OS=Homo sapi	1.225	9	1.114	1.1595	1.3967	0.897666		0.862441		0.715973	+	1	0.862441
Q96P47;Q96P47-2;Q96P47-4;Q96P47-5;D3DX07;Q9H3X2;Q96P47-3;Q96T14;Q96P47-6;Q86XV5;H0Y873;Q8N8Q2;Q86ST5;E7ESL9;Q6ZNF7;H7C5G0;H7C4U6;H7C4F1;C9J975	Arf-GAP with GTPase, ANK repeat and PH domain-containing protein 3	AGAP3;CENTG3;DKFZp761E2216	>sp|Q96P47|AGAP3_HUMAN Arf-GAP with GTPase, ANK repeat and PH domain-containing protein 3 OS=Homo sapiens GN=AGAP3 PE=1 SV=2;>sp|Q96P47-2|AGAP3_HUMAN Isoform 2 of Arf-GAP with GTPase, ANK repeat and PH domain-containing protein 3 OS=Homo sapiens GN=AGAP3;>	1.2278	8	1.1693	1.7314	1.2767	0.855213		0.577567	+	0.783269		1	0.783269
V9HWB7;P21399;Q5VZA6;Q59FI0;Q9HBB2	Cytoplasmic aconitate hydratase	ACO1;IRP1	>tr|V9HWB7|V9HWB7_HUMAN Epididymis luminal protein 60 OS=Homo sapiens GN=HEL60 PE=2 SV=1;>sp|P21399|ACOC_HUMAN Cytoplasmic aconitate hydratase OS=Homo sapiens GN=ACO1 PE=1 SV=3;>tr|Q5VZA6|Q5VZA6_HUMAN Cytoplasmic aconitate hydratase OS=Homo sapiens GN=ACO1	1.2303	3	1.3852	0.90402	1.2977	0.721917	+	1.10617		0.770594		1	0.770594
O75503;A0A024R644;B4E1V6	Ceroid-lipofuscinosis neuronal protein 5	CLN5	>sp|O75503|CLN5_HUMAN Ceroid-lipofuscinosis neuronal protein 5 OS=Homo sapiens GN=CLN5 PE=1 SV=2;>tr|A0A024R644|A0A024R644_HUMAN Ceroid-lipofuscinosis, neuronal 5, isoform CRA_a OS=Homo sapiens GN=CLN5 PE=4 SV=1;>tr|B4E1V6|B4E1V6_HUMAN cDNA FLJ54235, highl	1.2314	5	0.92178	1.4964	NaN	1.08486		0.668271	+	NaN		1	0.876564
Q15124	Phosphoglucomutase-like protein 5	PGM5	>sp|Q15124|PGM5_HUMAN Phosphoglucomutase-like protein 5 OS=Homo sapiens GN=PGM5 PE=1 SV=2	1.2321	4	1.5649	NaN	1.2239	0.639018	+	NaN		0.81706		1	0.728039
E5RIL0;Q6FHL7;O95214;H0YBC1;C9JVM4;E5RJS9;E5RHU8;O95214-2	Leptin receptor overlapping transcript-like 1	LEPROTL1	>tr|E5RIL0|E5RIL0_HUMAN Leptin receptor overlapping transcript-like 1 OS=Homo sapiens GN=LEPROTL1 PE=4 SV=1;>tr|Q6FHL7|Q6FHL7_HUMAN LEPROTL1 protein OS=Homo sapiens GN=LEPROTL1 PE=2 SV=1;>sp|O95214|LERL1_HUMAN Leptin receptor overlapping transcript-like 1	1.2323	5	1.1099	1.5035	NaN	0.900982		0.665115	+	NaN		1	0.783048
B1Q3B3;P02792;B1Q3B4;Q6S4P3	Ferritin;Ferritin light chain	FTL;FTL variant	>tr|B1Q3B3|B1Q3B3_HUMAN Ferritin (Fragment) OS=Homo sapiens GN=FTL PE=3 SV=1;>sp|P02792|FRIL_HUMAN Ferritin light chain OS=Homo sapiens GN=FTL PE=1 SV=2;>tr|B1Q3B4|B1Q3B4_HUMAN Ferritin (Fragment) OS=Homo sapiens GN=FTL variant PE=3 SV=1;>tr|Q6S4P3|Q6S4P3_	1.2397	5	1.6376	1.091	NaN	0.61065	+	0.91659		NaN		1	0.76362
Q9NQH7-2;Q9NQH7-4;Q9NQH7;Q9NQH7-3;Q9NQH7-5	Probable Xaa-Pro aminopeptidase 3	XPNPEP3	>sp|Q9NQH7-2|XPP3_HUMAN Isoform 2 of Probable Xaa-Pro aminopeptidase 3 OS=Homo sapiens GN=XPNPEP3;>sp|Q9NQH7-4|XPP3_HUMAN Isoform 4 of Probable Xaa-Pro aminopeptidase 3 OS=Homo sapiens GN=XPNPEP3;>sp|Q9NQH7|XPP3_HUMAN Probable Xaa-Pro aminopeptidase 3 OS=H	1.2452	4	1.5501	NaN	NaN	0.64512	+	NaN		NaN		1	0.64512
P53367-2;P53367;B4E273;B7ZA10;B4DS69;Q8N8M9	Arfaptin-1	ARFIP1	>sp|P53367-2|ARFP1_HUMAN Isoform A of Arfaptin-1 OS=Homo sapiens GN=ARFIP1;>sp|P53367|ARFP1_HUMAN Arfaptin-1 OS=Homo sapiens GN=ARFIP1 PE=1 SV=2;>tr|B4E273|B4E273_HUMAN ADP-ribosylation factor interacting protein 1 (Arfaptin 1), isoform CRA_b OS=Homo sapie	1.2454	5	1.3317	1.6393	1.3412	0.75092		0.610016	+	0.745601		1	0.745601
Q53GG3;O60749;B3KN57;B3KML1;O60749-2;D6RC15	Sorting nexin-2	SNX2	>tr|Q53GG3|Q53GG3_HUMAN Sorting nexin 2 variant (Fragment) OS=Homo sapiens PE=2 SV=1;>sp|O60749|SNX2_HUMAN Sorting nexin-2 OS=Homo sapiens GN=SNX2 PE=1 SV=2;>tr|B3KN57|B3KN57_HUMAN cDNA FLJ13654 fis, clone PLACE1011477, highly similar to Sorting nexin-2 OS	1.2463	13	1.2325	1.1919	1.443	0.811359		0.838997		0.693001	+	1	0.811359
Q5VSL9-2;Q5VSL9;A8K4U4;Q5VSL9-3;Q8WUN4;Q9ULQ0-2;Q9ULQ0;A8K2A0;A4D1K4	Striatin-interacting protein 1;Striatin-interacting protein 2	STRIP1;FAM40A;STRIP2;FAM40B	>sp|Q5VSL9-2|STRP1_HUMAN Isoform 2 of Striatin-interacting protein 1 OS=Homo sapiens GN=STRIP1;>sp|Q5VSL9|STRP1_HUMAN Striatin-interacting protein 1 OS=Homo sapiens GN=STRIP1 PE=1 SV=1;>tr|A8K4U4|A8K4U4_HUMAN cDNA FLJ77113 OS=Homo sapiens PE=2 SV=1;>sp|Q5V	1.2466	4	0.75011	1.9448	NaN	1.33314		0.514192	+	NaN		1	0.923665
Q15435;Q15435-2;H7C003;Q15435-3;C9JD73;C9J177;B5MBZ8;Q15435-5;Q15435-4;H7C3Q5;H7C118;C9JRC4	Protein phosphatase 1 regulatory subunit 7	PPP1R7	>sp|Q15435|PP1R7_HUMAN Protein phosphatase 1 regulatory subunit 7 OS=Homo sapiens GN=PPP1R7 PE=1 SV=1;>sp|Q15435-2|PP1R7_HUMAN Isoform 2 of Protein phosphatase 1 regulatory subunit 7 OS=Homo sapiens GN=PPP1R7;>tr|H7C003|H7C003_HUMAN Protein phosphatase 1 r	1.2477	25	1.2529	1.495	1.1497	0.798148		0.668896	+	0.869792		1	0.798148
O14672;A0A024R5U5;B4DU28;A0AV88;H0YNC5	Disintegrin and metalloproteinase domain-containing protein 10	ADAM10	>sp|O14672|ADA10_HUMAN Disintegrin and metalloproteinase domain-containing protein 10 OS=Homo sapiens GN=ADAM10 PE=1 SV=1;>tr|A0A024R5U5|A0A024R5U5_HUMAN ADAM metallopeptidase domain 10, isoform CRA_b OS=Homo sapiens GN=ADAM10 PE=4 SV=1;>tr|B4DU28|B4DU28_H	1.251	3	1.594	1.1038	1.3508	0.627353	+	0.905961		0.740302		1	0.740302
Q59ER4;Q96J02-3;B4DN85;Q96J02-2;Q96J02;H0YBA4;Q9H0M0-6;Q9H0M0-3;Q9H0M0;A8K9T5	E3 ubiquitin-protein ligase Itchy homolog;E3 ubiquitin-protein ligase;NEDD4-like E3 ubiquitin-protein ligase WWP1	ITCH;WWP1	>tr|Q59ER4|Q59ER4_HUMAN Itchy homolog E3 ubiquitin protein ligase variant (Fragment) OS=Homo sapiens PE=2 SV=1;>sp|Q96J02-3|ITCH_HUMAN Isoform 3 of E3 ubiquitin-protein ligase Itchy homolog OS=Homo sapiens GN=ITCH;>tr|B4DN85|B4DN85_HUMAN E3 ubiquitin-prote	1.2523	4	1.372	1.0858	NaN	0.728863	+	0.92098		NaN		1	0.824921
Q9Y6X9-2;Q9Y6X9;H7C3M1;H7C1V1	MORC family CW-type zinc finger protein 2	MORC2	>sp|Q9Y6X9-2|MORC2_HUMAN Isoform 2 of MORC family CW-type zinc finger protein 2 OS=Homo sapiens GN=MORC2;>sp|Q9Y6X9|MORC2_HUMAN MORC family CW-type zinc finger protein 2 OS=Homo sapiens GN=MORC2 PE=1 SV=2	1.2553	7	1.2186	1.4492	1.2553	0.820614		0.690036	+	0.796622		1	0.796622
P46108-2;P46108;L7RT18;I3L297	Adapter molecule crk	CRK	>sp|P46108-2|CRK_HUMAN Isoform Crk-I of Adapter molecule crk OS=Homo sapiens GN=CRK;>sp|P46108|CRK_HUMAN Adapter molecule crk OS=Homo sapiens GN=CRK PE=1 SV=2;>tr|L7RT18|L7RT18_HUMAN V-crk sarcoma virus CT10 oncogene homolog (Avian) OS=Homo sapiens GN=CRK	1.2559	9	2.1645	1.2559	1.1292	0.462	+	0.796242		0.885583		1	0.796242
Q53FS4;P49257;A0A024R2A7;B2R774	Protein ERGIC-53	LMAN1	>tr|Q53FS4|Q53FS4_HUMAN Lectin, mannose-binding, 1 variant (Fragment) OS=Homo sapiens PE=2 SV=1;>sp|P49257|LMAN1_HUMAN Protein ERGIC-53 OS=Homo sapiens GN=LMAN1 PE=1 SV=2;>tr|A0A024R2A7|A0A024R2A7_HUMAN Lectin, mannose-binding, 1, isoform CRA_b OS=Homo sap	1.2563	6	1.7716	1.1701	1.28	0.564462	+	0.854628		0.78125		1	0.78125
Q9P246;H0Y860;B3KUB5;F5GXJ4;E9PGD0;B7ZVY0;Q05BJ5;H7C5A5;A6H8L7	Stromal interaction molecule 2	STIM2	>sp|Q9P246|STIM2_HUMAN Stromal interaction molecule 2 OS=Homo sapiens GN=STIM2 PE=1 SV=2;>tr|H0Y860|H0Y860_HUMAN Stromal interaction molecule 2 OS=Homo sapiens GN=STIM2 PE=1 SV=1;>tr|B3KUB5|B3KUB5_HUMAN cDNA FLJ39527 fis, clone PUAEN2003116, highly similar	1.259	6	1.3984	1.134	1.3088	0.715103	+	0.881834		0.764059		1	0.764059
P00374;B0YJ76;A0A024RAQ3;B4DDD2;B4DM58;C9JJ68;Q86XF0;B3KV46	Dihydrofolate reductase;Dihydrofolate reductase, mitochondrial	DHFR;DYR;DHFRL1	>sp|P00374|DYR_HUMAN Dihydrofolate reductase OS=Homo sapiens GN=DHFR PE=1 SV=2;>tr|B0YJ76|B0YJ76_HUMAN Dihydrofolate reductase OS=Homo sapiens GN=DYR PE=2 SV=1;>tr|A0A024RAQ3|A0A024RAQ3_HUMAN Dihydrofolate reductase, isoform CRA_a OS=Homo sapiens GN=DHFR P	1.2607	6	1.499	1.2701	0.99599	0.667111	+	0.78734		1.00403		1	0.78734
Q05682-5;E7EX44;Q05682-3;E9PGZ1;Q05682-4;F5H1Z9;Q05682-6;Q05682-2;Q05682;Q9NYG1;B7Z6G4;C9J813;B4DPW5;B4E3I0;Q6PJM5;Q6P707;Q05DR4;C9JEK3;Q7Z2Y9;C9JE79;F8WE61;Q5HY93	Caldesmon	CALD1	>sp|Q05682-5|CALD1_HUMAN Isoform 5 of Caldesmon OS=Homo sapiens GN=CALD1;>tr|E7EX44|E7EX44_HUMAN Caldesmon OS=Homo sapiens GN=CALD1 PE=1 SV=1;>sp|Q05682-3|CALD1_HUMAN Isoform 3 of Caldesmon OS=Homo sapiens GN=CALD1;>tr|E9PGZ1|E9PGZ1_HUMAN Caldesmon OS=Homo	1.2632	27	1.2632	1.3507	1.2207	0.79164		0.740357	+	0.819202		1	0.79164
Q96IN2;Q6IBG8;Q16774;B1ANH5;B1ANH0;Q16774-2;B1ANH6;B1ANH2;A0A024R3U5;Q658U3;B1ANG9;Q16774-3;B1ANH3	Guanylate kinase	GUK1;DKFZp666D023	>tr|Q96IN2|Q96IN2_HUMAN GUK1 protein (Fragment) OS=Homo sapiens GN=GUK1 PE=2 SV=2;>tr|Q6IBG8|Q6IBG8_HUMAN GUK1 protein OS=Homo sapiens GN=GUK1 PE=2 SV=1;>sp|Q16774|KGUA_HUMAN Guanylate kinase OS=Homo sapiens GN=GUK1 PE=1 SV=2;>tr|B1ANH5|B1ANH5_HUMAN Guanyl	1.2644	5	1.2578	1.3433	1.2703	0.795039		0.744435	+	0.787216		1	0.787216
Q15043-2;Q15043-3;Q15043;E5RIP4;E5RFZ8;E5RGA7;E5RJ40;E5RJG5;E5RFT1	Zinc transporter ZIP14	SLC39A14	>sp|Q15043-2|S39AE_HUMAN Isoform 2 of Zinc transporter ZIP14 OS=Homo sapiens GN=SLC39A14;>sp|Q15043-3|S39AE_HUMAN Isoform 3 of Zinc transporter ZIP14 OS=Homo sapiens GN=SLC39A14;>sp|Q15043|S39AE_HUMAN Zinc transporter ZIP14 OS=Homo sapiens GN=SLC39A14 PE=1	1.2653	7	1.2653	1.1579	0.52582	0.790326		0.863632		1.90179	+	1	0.863632
O75112-4;O75112-7;B4DUL3;B4DND5;O75112-6;O75112-5;O75112-2;B4DGP4;V5T7C5;O75112	LIM domain-binding protein 3	LDB3	>sp|O75112-4|LDB3_HUMAN Isoform 4 of LIM domain-binding protein 3 OS=Homo sapiens GN=LDB3;>sp|O75112-7|LDB3_HUMAN Isoform 7 of LIM domain-binding protein 3 OS=Homo sapiens GN=LDB3;>tr|B4DUL3|B4DUL3_HUMAN cDNA FLJ53661, highly similar to Mus musculus LIM do	1.2663	5	1.1857	1.2663	1.4016	0.843384		0.789702		0.71347	+	1	0.789702
P04424-2;P04424;A0A024RDL8;P04424-3;F8W943;B4DU69;H7C0S8	Argininosuccinate lyase	ASL	>sp|P04424-2|ARLY_HUMAN Isoform 2 of Argininosuccinate lyase OS=Homo sapiens GN=ASL;>sp|P04424|ARLY_HUMAN Argininosuccinate lyase OS=Homo sapiens GN=ASL PE=1 SV=4;>tr|A0A024RDL8|A0A024RDL8_HUMAN Argininosuccinate lyase, isoform CRA_b OS=Homo sapiens GN=ASL	1.2677	4	1.7182	NaN	NaN	0.582004	+	NaN		NaN		1	0.582004
Q2TAY7;A0MNN4;B4E3L0	WD40 repeat-containing protein SMU1	SMU1	>sp|Q2TAY7|SMU1_HUMAN WD40 repeat-containing protein SMU1 OS=Homo sapiens GN=SMU1 PE=1 SV=2;>tr|A0MNN4|A0MNN4_HUMAN CDW3/SMU1 OS=Homo sapiens GN=SMU1 PE=2 SV=1;>tr|B4E3L0|B4E3L0_HUMAN WD40 repeat-containing protein SMU1 OS=Homo sapiens GN=SMU1 PE=1 SV=1	1.2738	16	1.2265	1.3681	1.3258	0.815328		0.730941	+	0.754262		1	0.754262
A0PJJ9;A4FU32;Q9UJ14;A5D8W8;Q6ZVB2;A2A2G5;Q9UJ14-5;B4DRZ0	Gamma-glutamyltransferase 7;Gamma-glutamyltransferase 7 heavy chain;Gamma-glutamyltransferase 7 light chain	GGT7	>tr|A0PJJ9|A0PJJ9_HUMAN GGT7 protein (Fragment) OS=Homo sapiens GN=GGT7 PE=2 SV=1;>tr|A4FU32|A4FU32_HUMAN GGT7 protein (Fragment) OS=Homo sapiens GN=GGT7 PE=2 SV=1;>sp|Q9UJ14|GGT7_HUMAN Gamma-glutamyltransferase 7 OS=Homo sapiens GN=GGT7 PE=1 SV=2;>tr|A5D8	1.274	7	2.7026	NaN	1.1762	0.370014	+	NaN		0.850196		1	0.610105
E9PQ48;E9PNZ0;E9PQR9;E9PIB2;P57764;A8K702;B4E113;Q6ZRV8;G3V1A6	Gasdermin-D	GSDMD	>tr|E9PQ48|E9PQ48_HUMAN Gasdermin-D (Fragment) OS=Homo sapiens GN=GSDMD PE=1 SV=1;>tr|E9PNZ0|E9PNZ0_HUMAN Gasdermin-D (Fragment) OS=Homo sapiens GN=GSDMD PE=1 SV=2;>tr|E9PQR9|E9PQR9_HUMAN Gasdermin-D (Fragment) OS=Homo sapiens GN=GSDMD PE=1 SV=1;>tr|E9PIB2	1.2744	3	2.1336	NaN	NaN	0.468691	+	NaN		NaN		1	0.468691
P11441;Q5HY81	Ubiquitin-like protein 4A	UBL4A	>sp|P11441|UBL4A_HUMAN Ubiquitin-like protein 4A OS=Homo sapiens GN=UBL4A PE=1 SV=1;>tr|Q5HY81|Q5HY81_HUMAN Ubiquitin-like protein 4A OS=Homo sapiens GN=UBL4A PE=1 SV=1	1.2747	6	1.5249	1.0301	1.0935	0.655781	+	0.97078		0.914495		1	0.914495
Q6IBB0;Q01629;H7BYV1;E9PS44;E9PQN9;P13164;A0A024R210;Q01628;H9NL19;H9NL12;H9NKY4	Interferon-induced transmembrane protein 2;Interferon-induced transmembrane protein 1;Interferon-induced transmembrane protein 3	IFITM2;IFITM3;IFITM1	>tr|Q6IBB0|Q6IBB0_HUMAN IFITM2 protein OS=Homo sapiens GN=IFITM2 PE=2 SV=1;>sp|Q01629|IFM2_HUMAN Interferon-induced transmembrane protein 2 OS=Homo sapiens GN=IFITM2 PE=1 SV=2;>tr|H7BYV1|H7BYV1_HUMAN Interferon-induced transmembrane protein 2 (Fragment) OS	1.2749	7	1.1978	1.2926	1.4348	0.834864		0.773635		0.696961	+	1	0.773635
Q8NAK2;Q59G01;A8KA62;Q12955-6;Q6ZT73;Q12955-7;Q12955-5;Q12955-4;Q12955;D6RBY7;D6RFK6;B1AQT1	Ankyrin-3	ANK3	>tr|Q8NAK2|Q8NAK2_HUMAN cDNA FLJ35208 fis, clone PLACE6018938, highly similar to Mus musculus epithelial ankyrin 3 (Ank3) 5kb isoform mRNA (Fragment) OS=Homo sapiens PE=2 SV=1;>tr|Q59G01|Q59G01_HUMAN Ankyrin 3 isoform 1 variant (Fragment) OS=Homo sapiens P	1.2799	4	1.4843	1.1346	NaN	0.673718	+	0.881368		NaN		1	0.777543
O00458-2;O00458;A4D0U1;H0YEE3;B7Z4L0;Q75M98;Q75M99;Q75MS4	Interferon-related developmental regulator 1	IFRD1	>sp|O00458-2|IFRD1_HUMAN Isoform 2 of Interferon-related developmental regulator 1 OS=Homo sapiens GN=IFRD1;>sp|O00458|IFRD1_HUMAN Interferon-related developmental regulator 1 OS=Homo sapiens GN=IFRD1 PE=1 SV=4;>tr|A4D0U1|A4D0U1_HUMAN Interferon-related de	1.2821	5	NaN	1.3768	0.77428	NaN		0.726322	+	1.29152		1	1.00892
P30533;B2R6S9;A8K8F6	Alpha-2-macroglobulin receptor-associated protein	LRPAP1	>sp|P30533|AMRP_HUMAN Alpha-2-macroglobulin receptor-associated protein OS=Homo sapiens GN=LRPAP1 PE=1 SV=1;>tr|B2R6S9|B2R6S9_HUMAN cDNA, FLJ93097, highly similar to Homo sapiens low density lipoprotein receptor-related protein associated protein 1 (LRPAP1	1.2875	8	1.36	1.1933	1.4964	0.735294		0.838012		0.668271	+	1	0.735294
Q04726-2;Q04726-7;Q04726-3;F8W8S3;Q6PRX2;Q04726-6;Q04726-5;Q04726-4;Q04726;H0YKT5;H0YKN8;H0YL70;F5H7D6;B3KUA2;H0YNT2;Q6PRX3;H0YKH0;H0YLW9;H0YLI3	Transducin-like enhancer protein 3	TLE3	>sp|Q04726-2|TLE3_HUMAN Isoform 2 of Transducin-like enhancer protein 3 OS=Homo sapiens GN=TLE3;>sp|Q04726-7|TLE3_HUMAN Isoform 7 of Transducin-like enhancer protein 3 OS=Homo sapiens GN=TLE3;>sp|Q04726-3|TLE3_HUMAN Isoform 3 of Transducin-like enhancer pr	1.289	11	1.2489	1.289	1.4229	0.800705		0.775795		0.70279	+	1	0.775795
C9JH43;Q4KMQ7;B7Z670;Q92823-3;Q14CA1;C9JYY6;Q92823-4;Q92823-6;Q92823-2;F8W775;Q92823;Q92823-5;Q75ML9	Neuronal cell adhesion molecule	NRCAM	>tr|C9JH43|C9JH43_HUMAN Neuronal cell adhesion molecule (Fragment) OS=Homo sapiens GN=NRCAM PE=4 SV=1;>tr|Q4KMQ7|Q4KMQ7_HUMAN NRCAM protein OS=Homo sapiens GN=NRCAM PE=2 SV=1;>tr|B7Z670|B7Z670_HUMAN cDNA FLJ61703, highly similar to Neuronal cell adhesion m	1.2911	3	NaN	1.3539	NaN	NaN		0.738607	+	NaN		1	0.738607
A6NKD9;G3V5D5;G3V2D7;H0YJE0	Coiled-coil domain-containing protein 85C	CCDC85C	>sp|A6NKD9|CC85C_HUMAN Coiled-coil domain-containing protein 85C OS=Homo sapiens GN=CCDC85C PE=1 SV=1	1.2912	10	1.3872	1.2027	1.3359	0.720877	+	0.831463		0.748559		1	0.748559
Q96BH1	E3 ubiquitin-protein ligase RNF25	RNF25	>sp|Q96BH1|RNF25_HUMAN E3 ubiquitin-protein ligase RNF25 OS=Homo sapiens GN=RNF25 PE=1 SV=1	1.2916	4	1.451	1.1638	1.0635	0.68918	+	0.859254		0.940291		1	0.859254
B4DTY8;P56199	Integrin alpha-1	ITGA1	>tr|B4DTY8|B4DTY8_HUMAN cDNA FLJ61587, highly similar to Integrin alpha-1 (Fragment) OS=Homo sapiens PE=2 SV=1;>sp|P56199|ITA1_HUMAN Integrin alpha-1 OS=Homo sapiens GN=ITGA1 PE=1 SV=2	1.2925	16	1.3022	1.3676	1.2698	0.767931		0.731208	+	0.787526		1	0.767931
P60983;G3V4P8;G3V3X4;M0QYG8;M0R1D2;M0R0C1;M0QYJ8;Q8TDZ6;O60234	Glia maturation factor beta	GMFB	>sp|P60983|GMFB_HUMAN Glia maturation factor beta OS=Homo sapiens GN=GMFB PE=1 SV=2;>tr|G3V4P8|G3V4P8_HUMAN Glia maturation factor beta (Fragment) OS=Homo sapiens GN=GMFB PE=1 SV=1	1.2975	5	1.5528	NaN	1.1196	0.643998	+	NaN		0.893176		1	0.768587
Q04917;A0A024R1K7;B2R6N6;Q9H4N8;A2IDB2;F8WEB6;A2IDB1	14-3-3 protein eta	YWHAH	>sp|Q04917|1433F_HUMAN 14-3-3 protein eta OS=Homo sapiens GN=YWHAH PE=1 SV=4;>tr|A0A024R1K7|A0A024R1K7_HUMAN Tyrosine 3-monooxygenase/tryptophan 5-monooxygenase activation protein, eta polypeptide, isoform CRA_b OS=Homo sapiens GN=YWHAH PE=3 SV=1;>tr|B2R6N	1.2994	43	1.2761	1.2266	1.493	0.783638		0.815262		0.669792	+	1	0.783638
Q9Y2I8;Q9Y2I8-2;E7EQ49;Q9Y2I8-3;C9JGR9	WD repeat-containing protein 37	WDR37	>sp|Q9Y2I8|WDR37_HUMAN WD repeat-containing protein 37 OS=Homo sapiens GN=WDR37 PE=1 SV=2;>sp|Q9Y2I8-2|WDR37_HUMAN Isoform 2 of WD repeat-containing protein 37 OS=Homo sapiens GN=WDR37;>tr|E7EQ49|E7EQ49_HUMAN WD repeat-containing protein 37 OS=Homo sapiens	1.3018	11	1.3345	1.5218	1.0119	0.749344		0.657117	+	0.98824		1	0.749344
Q00535;Q6IAW3;Q00535-2	Cyclin-dependent kinase 5	CDK5	>sp|Q00535|CDK5_HUMAN Cyclin-dependent kinase 5 OS=Homo sapiens GN=CDK5 PE=1 SV=3;>tr|Q6IAW3|Q6IAW3_HUMAN CDK5 protein OS=Homo sapiens GN=CDK5 PE=2 SV=1;>sp|Q00535-2|CDK5_HUMAN Isoform 2 of Cyclin-dependent kinase 5 OS=Homo sapiens GN=CDK5	1.3024	23	1.2447	1.3321	1.31	0.803406		0.750694	+	0.763359		1	0.763359
E9PJK1;E9PRJ8;H0YDL9;H0YDJ9;P60033;A0A024RCB7;E9PIF1;A6NMH8;E9PM31;H0YEE2	CD81 antigen	CD81	>tr|E9PJK1|E9PJK1_HUMAN CD81 antigen OS=Homo sapiens GN=CD81 PE=1 SV=1;>tr|E9PRJ8|E9PRJ8_HUMAN CD81 antigen (Fragment) OS=Homo sapiens GN=CD81 PE=1 SV=1;>tr|H0YDL9|H0YDL9_HUMAN CD81 antigen (Fragment) OS=Homo sapiens GN=CD81 PE=1 SV=1;>tr|H0YDJ9|H0YDJ9_HUM	1.3064	10	1.4165	1.3078	1.2599	0.705965	+	0.764643		0.793714		1	0.764643
Q59FI5;Q2TSD3;P17252;L7RSM7;P05771;P05771-2;H3BV73;J3KRN5;Q7Z727;B7Z3V9;B7Z8Q0;P05129;B2R5T1;F5H5C4;B7Z3W6	Protein kinase C;Protein kinase C alpha type;Protein kinase C beta type	PRKCA;PRKCB	>tr|Q59FI5|Q59FI5_HUMAN Protein kinase C, alpha variant (Fragment) OS=Homo sapiens PE=2 SV=1;>tr|Q2TSD3|Q2TSD3_HUMAN Protein kinase C OS=Homo sapiens PE=2 SV=1;>sp|P17252|KPCA_HUMAN Protein kinase C alpha type OS=Homo sapiens GN=PRKCA PE=1 SV=4;>tr|L7RSM7|	1.3108	10	1.6532	1.1784	1.2739	0.604887	+	0.848608		0.784991		1	0.784991
Q96DE1			>tr|Q96DE1|Q96DE1_HUMAN Putative uncharacterized protein (Fragment) OS=Homo sapiens PE=2 SV=1	1.3109	6	1.2604	1.4405	NaN	0.793399		0.694203	+	NaN		1	0.743801
B3KPL1;H0Y507;Q5TCZ1-3;Q5TCZ1;Q5TCZ1-2;B7Z7H2;F5GZ35;B7Z286;B7Z3B0;B7Z9L8;B7Z2H8;B7Z9C6;F8WCK5;B7Z2Z5	SH3 and PX domain-containing protein 2A	SH3PXD2A	>tr|B3KPL1|B3KPL1_HUMAN cDNA FLJ31907 fis, clone NT2RP7004396, highly similar to Homo sapiens SH3 multiple domains 1 (SH3MD1), mRNA OS=Homo sapiens PE=2 SV=1;>tr|H0Y507|H0Y507_HUMAN SH3 and PX domain-containing protein 2A (Fragment) OS=Homo sapiens GN=SH3P	1.3128	7	NaN	1.3397	1.3128	NaN		0.746436	+	0.761731		1	0.754083
Q5JS74;O14936-4;O14936-6;O14936-2;O14936;O14936-3;B7ZKY2;F8W998;H9KV37;Q5JS72;O14936-5	Peripheral plasma membrane protein CASK	CASK	>tr|Q5JS74|Q5JS74_HUMAN Peripheral plasma membrane protein CASK OS=Homo sapiens GN=CASK PE=4 SV=1;>sp|O14936-4|CSKP_HUMAN Isoform 4 of Peripheral plasma membrane protein CASK OS=Homo sapiens GN=CASK;>sp|O14936-6|CSKP_HUMAN Isoform 6 of Peripheral plasma me	1.3128	6	0.95873	1.6762	NaN	1.04305		0.596588	+	NaN		1	0.819817
B3KM89;O94855;O94855-2;A8K6V0;E9PDM8;Q49AI3;E9PC44;Q4W5D3;Q9NWP5	Protein transport protein Sec24D	SEC24D	>tr|B3KM89|B3KM89_HUMAN cDNA FLJ10528 fis, clone NT2RP2000943, highly similar to Protein transport protein Sec24D OS=Homo sapiens PE=2 SV=1;>sp|O94855|SC24D_HUMAN Protein transport protein Sec24D OS=Homo sapiens GN=SEC24D PE=1 SV=2;>sp|O94855-2|SC24D_HUMAN	1.3147	17	1.3147	1.2855	1.4446	0.76063		0.777907		0.692233	+	1	0.76063
Q9UBB6-2;Q9UBB6;Q9UBB6-3;H7C2R2;C9J5H8;B4DJ92	Neurochondrin	NCDN	>sp|Q9UBB6-2|NCDN_HUMAN Isoform 2 of Neurochondrin OS=Homo sapiens GN=NCDN;>sp|Q9UBB6|NCDN_HUMAN Neurochondrin OS=Homo sapiens GN=NCDN PE=1 SV=1;>sp|Q9UBB6-3|NCDN_HUMAN Isoform 3 of Neurochondrin OS=Homo sapiens GN=NCDN	1.3174	7	1.3221	1.3174	NaN	0.756372		0.759071	+	NaN		1	0.757722
P42224;P42224-2;J3KPM9;E7EPD2;D2KFR9;H7BZ88;Q67C41;H7BZB5;E9PH66;E7ENM1;A5D905	Signal transducer and activator of transcription 1-alpha/beta	STAT1	>sp|P42224|STAT1_HUMAN Signal transducer and activator of transcription 1-alpha/beta OS=Homo sapiens GN=STAT1 PE=1 SV=2;>sp|P42224-2|STAT1_HUMAN Isoform Beta of Signal transducer and activator of transcription 1-alpha/beta OS=Homo sapiens GN=STAT1;>tr|J3KP	1.3197	17	1.4587	1.1944	1.3309	0.685542	+	0.83724		0.751371		1	0.751371
Q9GZP4-2;Q9GZP4;X6RHB9;X6R8S9;B4DKP7	PITH domain-containing protein 1	PITHD1	>sp|Q9GZP4-2|PITH1_HUMAN Isoform 2 of PITH domain-containing protein 1 OS=Homo sapiens GN=PITHD1;>sp|Q9GZP4|PITH1_HUMAN PITH domain-containing protein 1 OS=Homo sapiens GN=PITHD1 PE=1 SV=1;>tr|X6RHB9|X6RHB9_HUMAN PITH domain-containing protein 1 (Fragment)	1.3213	3	1.9407	NaN	NaN	0.515278	+	NaN		NaN		1	0.515278
Q15645;H0YAL2;Q15645-2	Pachytene checkpoint protein 2 homolog	TRIP13	>sp|Q15645|PCH2_HUMAN Pachytene checkpoint protein 2 homolog OS=Homo sapiens GN=TRIP13 PE=1 SV=2	1.3223	16	1.2967	1.3776	1.2643	0.771188		0.7259	+	0.790952		1	0.771188
Q6ZNA5;Q6ZNA5-2	Ferric-chelate reductase 1	FRRS1	>sp|Q6ZNA5|FRRS1_HUMAN Ferric-chelate reductase 1 OS=Homo sapiens GN=FRRS1 PE=2 SV=2;>sp|Q6ZNA5-2|FRRS1_HUMAN Isoform 2 of Ferric-chelate reductase 1 OS=Homo sapiens GN=FRRS1	1.3235	3	NaN	1.8122	NaN	NaN		0.551815	+	NaN		1	0.551815
P33908;Q6P052	Mannosyl-oligosaccharide 1,2-alpha-mannosidase IA	MAN1A1	>sp|P33908|MA1A1_HUMAN Mannosyl-oligosaccharide 1,2-alpha-mannosidase IA OS=Homo sapiens GN=MAN1A1 PE=1 SV=3;>tr|Q6P052|Q6P052_HUMAN MAN1A1 protein OS=Homo sapiens GN=MAN1A1 PE=1 SV=1	1.3266	6	1.4729	1.2454	NaN	0.678933	+	0.802955		NaN		1	0.740944
V9HW80;P55072;Q96IF9;Q0IIN5;Q9NTC4;Q9HAP0;Q9HAP1;C9IZA5;C9JUP7;E7EQM8;B4DYX2	Transitional endoplasmic reticulum ATPase	VCP;DKFZp434K0126	>tr|V9HW80|V9HW80_HUMAN Epididymis luminal protein 220 OS=Homo sapiens GN=HEL-S-70 PE=2 SV=1;>sp|P55072|TERA_HUMAN Transitional endoplasmic reticulum ATPase OS=Homo sapiens GN=VCP PE=1 SV=4;>tr|Q96IF9|Q96IF9_HUMAN VCP protein (Fragment) OS=Homo sapiens GN=	1.3283	244	1.3525	1.3296	1.3096	0.739372		0.752106	+	0.763592		1	0.752106
Q9Y2Q5;Q9Y2Q5-2;Q9Y2Q5-3	Ragulator complex protein LAMTOR2	LAMTOR2	>sp|Q9Y2Q5|LTOR2_HUMAN Ragulator complex protein LAMTOR2 OS=Homo sapiens GN=LAMTOR2 PE=1 SV=1;>sp|Q9Y2Q5-2|LTOR2_HUMAN Isoform 2 of Ragulator complex protein LAMTOR2 OS=Homo sapiens GN=LAMTOR2;>sp|Q9Y2Q5-3|LTOR2_HUMAN Isoform 3 of Ragulator complex protein	1.3304	5	NaN	1.343	1.3008	NaN		0.744602	+	0.768758		1	0.75668
Q8IX26;F5GZI3;Q8IX28;Q8IX27;Q8TEW0-9;Q8TEW0-10;Q5VWU8;Q8TEW0-8;Q8TEW0-5;Q8TEW0-3;Q8TEW0-7;Q5VWV2;Q8TEW0-6;Q8TEW0-4;Q8TEW0-11;Q8TEW0-2;Q8TEW0;B1AP52	Partitioning defective 3 homolog	PARD3	>tr|Q8IX26|Q8IX26_HUMAN SE2-5T2 protein OS=Homo sapiens PE=2 SV=1;>tr|F5GZI3|F5GZI3_HUMAN Partitioning defective 3 homolog OS=Homo sapiens GN=PARD3 PE=1 SV=1;>tr|Q8IX28|Q8IX28_HUMAN SE2-5LT1 protein (Fragment) OS=Homo sapiens PE=2 SV=1;>tr|Q8IX27|Q8IX27_HU	1.3313	5	1.3112	1.3313	1.3601	0.76266		0.751145	+	0.73524		1	0.751145
Q2NLC8;Q9Y2Q3;Q6FII1;Q9Y2Q3-3;Q9Y2Q3-2;Q9Y2Q3-4;E9PFN5;C9JNT3;B3KTA6	Glutathione S-transferase kappa 1	GSTK1;LOC51064	>tr|Q2NLC8|Q2NLC8_HUMAN GSTK1 protein (Fragment) OS=Homo sapiens GN=GSTK1 PE=2 SV=1;>sp|Q9Y2Q3|GSTK1_HUMAN Glutathione S-transferase kappa 1 OS=Homo sapiens GN=GSTK1 PE=1 SV=3;>tr|Q6FII1|Q6FII1_HUMAN Glutathione S-transferase kappa 1 OS=Homo sapiens GN=LOC	1.333	18	1.241	1.4838	1.338	0.805802		0.673945	+	0.747384		1	0.747384
E5RIR0;P15090;E7DVW4;E5RH45;P02689	Fatty acid-binding protein, adipocyte;Myelin P2 protein	FABP4;PMP2	>tr|E5RIR0|E5RIR0_HUMAN Fatty acid-binding protein, adipocyte OS=Homo sapiens GN=FABP4 PE=1 SV=1;>sp|P15090|FABP4_HUMAN Fatty acid-binding protein, adipocyte OS=Homo sapiens GN=FABP4 PE=1 SV=3;>tr|E7DVW4|E7DVW4_HUMAN Epididymis secretory protein Li 104 OS=	1.3344	4	NaN	1.3664	NaN	NaN		0.73185	+	NaN		1	0.73185
P52597;A0A024R7T3;B4DKS8	Heterogeneous nuclear ribonucleoprotein F;Heterogeneous nuclear ribonucleoprotein F, N-terminally processed	HNRNPF	>sp|P52597|HNRPF_HUMAN Heterogeneous nuclear ribonucleoprotein F OS=Homo sapiens GN=HNRNPF PE=1 SV=3;>tr|A0A024R7T3|A0A024R7T3_HUMAN Heterogeneous nuclear ribonucleoprotein F, isoform CRA_a OS=Homo sapiens GN=HNRPF PE=4 SV=1;>tr|B4DKS8|B4DKS8_HUMAN cDNA FL	1.3389	23	1.3435	1.4154	1.2977	0.744325		0.706514	+	0.770594		1	0.744325
P42684-4;P42684-7;P42684-10;P42684-5;P42684-2;P42684-6;P42684-3;P42684;P42684-8	Abelson tyrosine-protein kinase 2	ABL2	>sp|P42684-4|ABL2_HUMAN Isoform 4 of Abelson tyrosine-protein kinase 2 OS=Homo sapiens GN=ABL2;>sp|P42684-7|ABL2_HUMAN Isoform 7 of Abelson tyrosine-protein kinase 2 OS=Homo sapiens GN=ABL2;>sp|P42684-10|ABL2_HUMAN Isoform 10 of Abelson tyrosine-protein ki	1.3415	3	NaN	0.7164	NaN	NaN		1.39587	+	NaN		1	1.39587
Q7Z3E5-2;A0A024R486;Q7Z3E5;H7C3U7;H7BZY2;C9JW07;H7C2P6	LisH domain-containing protein ARMC9	ARMC9	>sp|Q7Z3E5-2|ARMC9_HUMAN Isoform 2 of LisH domain-containing protein ARMC9 OS=Homo sapiens GN=ARMC9;>tr|A0A024R486|A0A024R486_HUMAN Armadillo repeat containing 9, isoform CRA_c OS=Homo sapiens GN=ARMC9 PE=4 SV=1;>sp|Q7Z3E5|ARMC9_HUMAN LisH domain-containin	1.3416	30	1.3255	1.2208	1.4226	0.754432		0.819135		0.702938	+	1	0.754432
Q96EP9	Sodium/bile acid cotransporter 4	SLC10A4	>sp|Q96EP9|NTCP4_HUMAN Sodium/bile acid cotransporter 4 OS=Homo sapiens GN=SLC10A4 PE=1 SV=2	1.3472	3	3.5013	NaN	NaN	0.285608	+	NaN		NaN		1	0.285608
P52306;B3KNU0;P52306-2;P52306-4;P52306-5;P52306-6;P52306-3;Q6U7G8;B7Z2V8;B7Z4M5;D6RHH8;D6RBC6;D6RHZ7;D6RB97;H0Y8M2;D6REZ0;D6RC12	Rap1 GTPase-GDP dissociation stimulator 1	RAP1GDS1	>sp|P52306|GDS1_HUMAN Rap1 GTPase-GDP dissociation stimulator 1 OS=Homo sapiens GN=RAP1GDS1 PE=1 SV=3;>tr|B3KNU0|B3KNU0_HUMAN cDNA FLJ30470 fis, clone BRAWH1000040, highly similar to Rap1 GTPase-GDP dissociation stimulator 1 OS=Homo sapiens PE=2 SV=1;>sp|P	1.3476	28	1.3761	1.2838	1.2979	0.726691	+	0.778938		0.770475		1	0.770475
P49902;A8K6K2;Q5JUV4;P49902-2;Q5JUV3;B3KXN5;S4R3E7;S4R3A6;Q5JUV6;H0YHR8	Cytosolic purine 5-nucleotidase	NT5C2	>sp|P49902|5NTC_HUMAN Cytosolic purine 5-nucleotidase OS=Homo sapiens GN=NT5C2 PE=1 SV=1;>tr|A8K6K2|A8K6K2_HUMAN cDNA FLJ75877, highly similar to Homo sapiens 5-nucleotidase, cytosolic II (NT5C2), mRNA OS=Homo sapiens PE=2 SV=1;>tr|Q5JUV4|Q5JUV4_HUMAN Cy	1.3558	6	1.2648	1.2938	1.4748	0.790639		0.772917		0.678058	+	1	0.772917
V9GYY8;Q96SI1-2;Q96SI1;B4DGD9;K7EN63;REV__Q14999;REV__A8K9U1;REV__Q14999-2	BTB/POZ domain-containing protein KCTD15	KCTD15	>tr|V9GYY8|V9GYY8_HUMAN BTB/POZ domain-containing protein KCTD15 (Fragment) OS=Homo sapiens GN=KCTD15 PE=1 SV=1;>sp|Q96SI1-2|KCD15_HUMAN Isoform 2 of BTB/POZ domain-containing protein KCTD15 OS=Homo sapiens GN=KCTD15;>sp|Q96SI1|KCD15_HUMAN BTB/POZ domain-c	1.3657	4	NaN	1.4927	NaN	NaN		0.669927	+	NaN		1	0.669927
Q05DQ6;O14777;A8K031;V9GYM9	Kinetochore protein NDC80 homolog	NDC80;KNTC2	>tr|Q05DQ6|Q05DQ6_HUMAN NDC80 protein (Fragment) OS=Homo sapiens GN=NDC80 PE=1 SV=1;>sp|O14777|NDC80_HUMAN Kinetochore protein NDC80 homolog OS=Homo sapiens GN=NDC80 PE=1 SV=1;>tr|A8K031|A8K031_HUMAN Kinetochore associated 2, isoform CRA_a OS=Homo sapiens	1.3736	3	10.343	NaN	NaN	0.0966837	+	NaN		NaN		1	0.0966837
F8VZZ0;F8VZ51;Q6LC83;F8VXD2;B4DNF9		CDK4	>tr|F8VZZ0|F8VZZ0_HUMAN Cyclin-dependent kinase 4 (Fragment) OS=Homo sapiens GN=CDK4 PE=1 SV=1;>tr|F8VZ51|F8VZ51_HUMAN Cyclin-dependent kinase 4 (Fragment) OS=Homo sapiens GN=CDK4 PE=1 SV=1;>tr|Q6LC83|Q6LC83_HUMAN Cyclin dependent protein kinase OS=Homo sa	1.376	5	1.3011	1.3195	0.91561	0.76858		0.757863	+	1.09217		1	0.76858
Q6FGG2;Q15836;K7ENK9;K7EKX0;J3QRU4;P63027;F8WCA0;L7N2F9	Vesicle-associated membrane protein 3	VAMP3	>tr|Q6FGG2|Q6FGG2_HUMAN VAMP3 protein OS=Homo sapiens GN=VAMP3 PE=2 SV=1;>sp|Q15836|VAMP3_HUMAN Vesicle-associated membrane protein 3 OS=Homo sapiens GN=VAMP3 PE=1 SV=3	1.3761	8	1.068	1.367	NaN	0.93633		0.731529	+	NaN		1	0.833929
O60518;B4DTX6	Ran-binding protein 6	RANBP6	>sp|O60518|RNBP6_HUMAN Ran-binding protein 6 OS=Homo sapiens GN=RANBP6 PE=1 SV=2;>tr|B4DTX6|B4DTX6_HUMAN cDNA FLJ54311, highly similar to Ran-binding protein 6 OS=Homo sapiens PE=2 SV=1	1.3815	3	1.3815	NaN	NaN	0.723851	+	NaN		NaN		1	0.723851
Q7KZN9-2;Q7KZN9;B4DQM2	Cytochrome c oxidase assembly protein COX15 homolog	COX15	>sp|Q7KZN9-2|COX15_HUMAN Isoform 2 of Cytochrome c oxidase assembly protein COX15 homolog OS=Homo sapiens GN=COX15;>sp|Q7KZN9|COX15_HUMAN Cytochrome c oxidase assembly protein COX15 homolog OS=Homo sapiens GN=COX15 PE=1 SV=1;>tr|B4DQM2|B4DQM2_HUMAN cDNA FL	1.3837	3	0.71901	NaN	NaN	1.3908	+	NaN		NaN		1	1.3908
Q9BRL6-2;Q9BRL6;A0A024R3A8	Serine/arginine-rich splicing factor 8	SRSF8	>sp|Q9BRL6-2|SRSF8_HUMAN Isoform 2 of Serine/arginine-rich splicing factor 8 OS=Homo sapiens GN=SRSF8;>sp|Q9BRL6|SRSF8_HUMAN Serine/arginine-rich splicing factor 8 OS=Homo sapiens GN=SRSF8 PE=1 SV=1;>tr|A0A024R3A8|A0A024R3A8_HUMAN Splicing factor, arginine	1.3841	6	1.371	NaN	NaN	0.729395	+	NaN		NaN		1	0.729395
Q8IZJ1-2;Q8IZJ1	Netrin receptor UNC5B	UNC5B	>sp|Q8IZJ1-2|UNC5B_HUMAN Isoform 2 of Netrin receptor UNC5B OS=Homo sapiens GN=UNC5B;>sp|Q8IZJ1|UNC5B_HUMAN Netrin receptor UNC5B OS=Homo sapiens GN=UNC5B PE=1 SV=2	1.3858	7	1.3496	1.2225	1.6926	0.74096		0.817996		0.590807	+	1	0.74096
Q9UL26;J3QR51;Q13636;Q53EY4	Ras-related protein Rab-22A;Ras-related protein Rab-31	RAB22A;RAB31	>sp|Q9UL26|RB22A_HUMAN Ras-related protein Rab-22A OS=Homo sapiens GN=RAB22A PE=1 SV=2;>tr|J3QR51|J3QR51_HUMAN Ras-related protein Rab-31 OS=Homo sapiens GN=RAB31 PE=1 SV=2;>sp|Q13636|RAB31_HUMAN Ras-related protein Rab-31 OS=Homo sapiens GN=RAB31 PE=1 SV=	1.386	4	1.5366	NaN	NaN	0.650787	+	NaN		NaN		1	0.650787
F5H7I4;B7Z8U2;B7Z726;Q06547-2;A0A024R5X6;Q06547	GA-binding protein subunit beta-1	GABPB1	>tr|F5H7I4|F5H7I4_HUMAN GA-binding protein subunit beta-1 OS=Homo sapiens GN=GABPB1 PE=1 SV=1;>tr|B7Z8U2|B7Z8U2_HUMAN cDNA FLJ57282, highly similar to GA-binding protein beta chain OS=Homo sapiens PE=2 SV=1;>tr|B7Z726|B7Z726_HUMAN cDNA FLJ60177, highly sim	1.392	3	1.3989	NaN	NaN	0.714847	+	NaN		NaN		1	0.714847
A9UEZ6;A9UF02;Q8NF93;J7M832;E7E8T7;A9UF06;A9UEZ8;A9UF00;A9UEZ7;A9UEZ5;B4DH91;A2RQD6;B4E065;Q59F19;P00519;A0A024R8E2;P00519-2;Q59FK4;P11274-2;P11274;A9UF07	Tyrosine-protein kinase ABL1;Breakpoint cluster region protein	BCR/ABL fusion;BCR/ABL1 fusion;BCR-ABL1;ABL1;BCR	>tr|A9UEZ6|A9UEZ6_HUMAN BCR/ABL fusion protein isoform X3 OS=Homo sapiens GN=BCR/ABL fusion PE=2 SV=1;>tr|A9UF02|A9UF02_HUMAN BCR/ABL fusion protein isoform X9 OS=Homo sapiens GN=BCR/ABL fusion PE=2 SV=1;>tr|Q8NF93|Q8NF93_HUMAN BCRE3/ABL1A11 fusion protein	1.398	3	1.5204	NaN	NaN	0.657722	+	NaN		NaN		1	0.657722
Q13557-8;Q13557-12;Q13557-10;D6R938;Q13557;A0A024RDK3;E9PBG7;Q13557-6;Q13557-11;E9PF82;Q13557-9;Q13557-5;Q13557-3;Q13557-4;B7Z2B0;H0Y9J2;Q4G1A8;Q92991;Q9UQM7;Q8IWE0;Q7LDD5;Q9UQM7-2;A8K161;D6RHX9;E9PBE8;E7EQE4	Calcium/calmodulin-dependent protein kinase type II subunit delta	CAMK2D	>sp|Q13557-8|KCC2D_HUMAN Isoform Delta 6 of Calcium/calmodulin-dependent protein kinase type II subunit delta OS=Homo sapiens GN=CAMK2D;>sp|Q13557-12|KCC2D_HUMAN Isoform Delta 12 of Calcium/calmodulin-dependent protein kinase type II subunit delta OS=Homo	1.4009	9	1.3304	1.7974	0.96795	0.751654		0.556359	+	1.03311		1	0.751654
Q13740-4	CD166 antigen	ALCAM	>sp|Q13740-4|CD166_HUMAN Isoform 4 of CD166 antigen OS=Homo sapiens GN=ALCAM	1.4023	6	NaN	1.5029	1.349	NaN		0.66538	+	0.74129		1	0.703335
Q9Y6I3-3;Q9Y6I3;A0A024R4S1;Q9Y6I3-1;B4DU91;D6R907;D6RBI9	Epsin-1	EPN1	>sp|Q9Y6I3-3|EPN1_HUMAN Isoform 3 of Epsin-1 OS=Homo sapiens GN=EPN1;>sp|Q9Y6I3|EPN1_HUMAN Epsin-1 OS=Homo sapiens GN=EPN1 PE=1 SV=2;>tr|A0A024R4S1|A0A024R4S1_HUMAN Epsin 1, isoform CRA_a OS=Homo sapiens GN=EPN1 PE=4 SV=1;>sp|Q9Y6I3-1|EPN1_HUMAN Isoform 2	1.4124	5	1.4124	NaN	0.97139	0.708015	+	NaN		1.02945		1	0.868734
Q712K3	Ubiquitin-conjugating enzyme E2 R2	UBE2R2	>sp|Q712K3|UB2R2_HUMAN Ubiquitin-conjugating enzyme E2 R2 OS=Homo sapiens GN=UBE2R2 PE=1 SV=1	1.4135	4	1.716	NaN	NaN	0.582751	+	NaN		NaN		1	0.582751
B3KRC6;Q16850;H7C0D0;Q16850-2;Q05D40	Lanosterol 14-alpha demethylase	CYP51A1	>tr|B3KRC6|B3KRC6_HUMAN cDNA FLJ34004 fis, clone FCBBF1000232, highly similar to Cytochrome P450 51A1 (EC 1.14.13.70) OS=Homo sapiens PE=2 SV=1;>sp|Q16850|CP51A_HUMAN Lanosterol 14-alpha demethylase OS=Homo sapiens GN=CYP51A1 PE=1 SV=3;>tr|H7C0D0|H7C0D0_HU	1.4149	4	1.2631	1.3051	0.57109	0.791703		0.766225		1.75104	+	1	0.791703
Q8N1W1-4;Q8N1W1-3;Q8N1W1;Q8N1W1-6;Q8N1W1-5;D6RGZ3;Q8N1W1-2	Rho guanine nucleotide exchange factor 28	ARHGEF28	>sp|Q8N1W1-4|ARG28_HUMAN Isoform 4 of Rho guanine nucleotide exchange factor 28 OS=Homo sapiens GN=ARHGEF28;>sp|Q8N1W1-3|ARG28_HUMAN Isoform 3 of Rho guanine nucleotide exchange factor 28 OS=Homo sapiens GN=ARHGEF28;>sp|Q8N1W1|ARG28_HUMAN Rho guanine nucle	1.428	3	NaN	1.3843	NaN	NaN		0.722387	+	NaN		1	0.722387
F5H702;Q96GC5-3;Q96GC5;F5H8D0	39S ribosomal protein L48, mitochondrial	MRPL48	>tr|F5H702|F5H702_HUMAN 39S ribosomal protein L48, mitochondrial OS=Homo sapiens GN=MRPL48 PE=1 SV=1;>sp|Q96GC5-3|RM48_HUMAN Isoform 2 of 39S ribosomal protein L48, mitochondrial OS=Homo sapiens GN=MRPL48;>sp|Q96GC5|RM48_HUMAN 39S ribosomal protein L48, mi	1.4421	3	NaN	1.3463	NaN	NaN		0.742776	+	NaN		1	0.742776
Q5VW28;O00712;B4DS74;O00712-4;Q5VW27;O00712-5;Q5VW30;Q5VW26;Q5VW31;O00712-6	Nuclear factor 1;Nuclear factor 1 B-type	NFIB	>tr|Q5VW28|Q5VW28_HUMAN Nuclear factor 1 OS=Homo sapiens GN=NFIB PE=2 SV=1;>sp|O00712|NFIB_HUMAN Nuclear factor 1 B-type OS=Homo sapiens GN=NFIB PE=1 SV=2;>tr|B4DS74|B4DS74_HUMAN Nuclear factor 1 OS=Homo sapiens PE=2 SV=1;>sp|O00712-4|NFIB_HUMAN Isoform 4	1.4426	6	1.5808	NaN	1.2214	0.632591	+	NaN		0.818733		1	0.725662
Q8TE59	A disintegrin and metalloproteinase with thrombospondin motifs 19	ADAMTS19	>sp|Q8TE59|ATS19_HUMAN A disintegrin and metalloproteinase with thrombospondin motifs 19 OS=Homo sapiens GN=ADAMTS19 PE=2 SV=2	1.4573	2	NaN	NaN	1.4573	NaN		NaN		0.686201	+	1	0.686201
P31327-2;Q5R209;Q5R210;Q5R208;Q5R206;P31327;A8K134;A0A024R454;P31327-3	Carbamoyl-phosphate synthase [ammonia], mitochondrial	CPS1	>sp|P31327-2|CPSM_HUMAN Isoform 2 of Carbamoyl-phosphate synthase [ammonia], mitochondrial OS=Homo sapiens GN=CPS1;>tr|Q5R209|Q5R209_HUMAN Carbamoylphosphate synthetase I OS=Homo sapiens GN=CPS1 PE=2 SV=1;>tr|Q5R210|Q5R210_HUMAN Carbamoylphosphate syntheta	1.4591	3	NaN	1.4679	NaN	NaN		0.681245	+	NaN		1	0.681245
Q15172;Q15172-2	Serine/threonine-protein phosphatase 2A 56 kDa regulatory subunit alpha isoform	PPP2R5A	>sp|Q15172|2A5A_HUMAN Serine/threonine-protein phosphatase 2A 56 kDa regulatory subunit alpha isoform OS=Homo sapiens GN=PPP2R5A PE=1 SV=1;>sp|Q15172-2|2A5A_HUMAN Isoform 2 of Serine/threonine-protein phosphatase 2A 56 kDa regulatory subunit alpha isoform	1.4625	5	NaN	0.915	1.4941	NaN		1.0929		0.669299	+	1	0.881098
B3KSR7;O15484;Q59GM2;Q6ZRM8;E7EV01;K7EP62;E9PS73	Calpain-5	CAPN5	>tr|B3KSR7|B3KSR7_HUMAN cDNA FLJ36831 fis, clone ASTRO2010615, highly similar to Calpain-5 (EC 3.4.22.-) OS=Homo sapiens PE=2 SV=1;>sp|O15484|CAN5_HUMAN Calpain-5 OS=Homo sapiens GN=CAPN5 PE=1 SV=2;>tr|Q59GM2|Q59GM2_HUMAN Putative uncharacterized protein (	1.4703	3	1.409	NaN	NaN	0.709723	+	NaN		NaN		1	0.709723
Q12872;Q12872-2;Q8IV81;F5H1A5;Q59H38;B4DHK4;A5PLM7;F5H5X1	Splicing factor, suppressor of white-apricot homolog	SFSWAP;SFRS8	>sp|Q12872|SFSWA_HUMAN Splicing factor, suppressor of white-apricot homolog OS=Homo sapiens GN=SFSWAP PE=1 SV=3;>sp|Q12872-2|SFSWA_HUMAN Isoform 2 of Splicing factor, suppressor of white-apricot homolog OS=Homo sapiens GN=SFSWAP;>tr|Q8IV81|Q8IV81_HUMAN SFR	1.4799	4	0.78594	1.5484	NaN	1.27236		0.645828	+	NaN		1	0.959095
P42330;B4DKT3	Aldo-keto reductase family 1 member C3	AKR1C3	>sp|P42330|AK1C3_HUMAN Aldo-keto reductase family 1 member C3 OS=Homo sapiens GN=AKR1C3 PE=1 SV=4;>tr|B4DKT3|B4DKT3_HUMAN cDNA FLJ58390, highly similar to Aldo-keto reductase family 1 member C3homolog (EC 1.-.-.-) OS=Homo sapiens PE=2 SV=1	1.489	4	1.4244	NaN	NaN	0.70205	+	NaN		NaN		1	0.70205
B9EH95;C9JJX6;O00192-2;E9PDC3;O00192;Q05BN6;Q8NAH4	Armadillo repeat protein deleted in velo-cardio-facial syndrome	ARVCF	>tr|B9EH95|B9EH95_HUMAN Armadillo repeat gene deletes in velocardiofacial syndrome OS=Homo sapiens GN=ARVCF PE=2 SV=1;>tr|C9JJX6|C9JJX6_HUMAN Armadillo repeat protein deleted in velo-cardio-facial syndrome OS=Homo sapiens GN=ARVCF PE=1 SV=1;>sp|O00192-2|AR	1.5047	6	1.5331	NaN	NaN	0.652273	+	NaN		NaN		1	0.652273
Q9BSR8	Protein YIPF4	YIPF4	>sp|Q9BSR8|YIPF4_HUMAN Protein YIPF4 OS=Homo sapiens GN=YIPF4 PE=1 SV=1	1.5286	3	NaN	NaN	1.4295	NaN		NaN		0.699545	+	1	0.699545
Q53GE9	Elongation factor 1-alpha		>tr|Q53GE9|Q53GE9_HUMAN Elongation factor 1-alpha (Fragment) OS=Homo sapiens PE=2 SV=1	1.5672	4	NaN	NaN	1.395	NaN		NaN		0.716846	+	1	0.716846
C9JPX5;C9JKL2;O95772-2;O95772;A0A024RA89	MLN64 N-terminal domain homolog	STARD3NL	>tr|C9JPX5|C9JPX5_HUMAN MLN64 N-terminal domain homolog (Fragment) OS=Homo sapiens GN=STARD3NL PE=1 SV=1;>tr|C9JKL2|C9JKL2_HUMAN MLN64 N-terminal domain homolog OS=Homo sapiens GN=STARD3NL PE=1 SV=1;>sp|O95772-2|MENTO_HUMAN Isoform 2 of MLN64 N-terminal do	1.5689	2	NaN	1.5689	NaN	NaN		0.637389	+	NaN		1	0.637389
P52735-3;P52735-2;P52735	Guanine nucleotide exchange factor VAV2	VAV2	>sp|P52735-3|VAV2_HUMAN Isoform 3 of Guanine nucleotide exchange factor VAV2 OS=Homo sapiens GN=VAV2;>sp|P52735-2|VAV2_HUMAN Isoform 2 of Guanine nucleotide exchange factor VAV2 OS=Homo sapiens GN=VAV2;>sp|P52735|VAV2_HUMAN Guanine nucleotide exchange fact	1.5695	8	1.3528	1.9756	1.0585	0.739208		0.506175	+	0.944733		1	0.739208
Q9UBI6;Q53GD1	Guanine nucleotide-binding protein G(I)/G(S)/G(O) subunit gamma-12;Guanine nucleotide-binding protein subunit gamma	GNG12	>sp|Q9UBI6|GBG12_HUMAN Guanine nucleotide-binding protein G(I)/G(S)/G(O) subunit gamma-12 OS=Homo sapiens GN=GNG12 PE=1 SV=3;>tr|Q53GD1|Q53GD1_HUMAN Guanine nucleotide-binding protein subunit gamma (Fragment) OS=Homo sapiens PE=2 SV=1	1.6176	4	0.81626	0.81935	1.5639	1.2251		1.22048		0.639427	+	1	1.22048
H7C585;C9JAX1;Q16595	Frataxin, mitochondrial;Frataxin intermediate form;Frataxin(56-210);Frataxin(78-210);Frataxin mature form	FXN	>tr|H7C585|H7C585_HUMAN Frataxin, mitochondrial (Fragment) OS=Homo sapiens GN=FXN PE=1 SV=1;>tr|C9JAX1|C9JAX1_HUMAN Frataxin, mitochondrial OS=Homo sapiens GN=FXN PE=1 SV=1;>sp|Q16595|FRDA_HUMAN Frataxin, mitochondrial OS=Homo sapiens GN=FXN PE=1 SV=2	1.6727	4	NaN	NaN	1.6734	NaN		NaN		0.597586	+	1	0.597586
Q9BXV9;H0YJA8	Uncharacterized protein C14orf142	C14orf142	>sp|Q9BXV9|CN142_HUMAN Uncharacterized protein C14orf142 OS=Homo sapiens GN=C14orf142 PE=1 SV=2	1.679	4	4.2115	NaN	NaN	0.237445	+	NaN		NaN		1	0.237445
Q9UHA4-2;Q9UHA4;Q53FH6	Ragulator complex protein LAMTOR3	LAMTOR3	>sp|Q9UHA4-2|LTOR3_HUMAN Isoform 2 of Ragulator complex protein LAMTOR3 OS=Homo sapiens GN=LAMTOR3;>sp|Q9UHA4|LTOR3_HUMAN Ragulator complex protein LAMTOR3 OS=Homo sapiens GN=LAMTOR3 PE=1 SV=1;>tr|Q53FH6|Q53FH6_HUMAN Mitogen-activated protein kinase kinase	1.8099	2	1.8099	NaN	NaN	0.552517	+	NaN		NaN		1	0.552517
B3KVN0;B4DKW1;Q0P512;P11166;Q59GX2;C9JIM8;B4DDR6	Solute carrier family 2, facilitated glucose transporter member 1	SLC2A1	>tr|B3KVN0|B3KVN0_HUMAN cDNA FLJ16785 fis, clone NT2RI2015342, highly similar to Solute carrier family 2, facilitated glucose transporter member 1 OS=Homo sapiens PE=2 SV=1;>tr|B4DKW1|B4DKW1_HUMAN cDNA FLJ55703, highly similar to Solute carrier family 2, f	1.8142	3	1.6899	NaN	NaN	0.591751	+	NaN		NaN		1	0.591751
Q06481-5;F5H845;B4DTV1;F5GZY0;B4E3I5;Q06481-4;Q06481-2;A0A024R3N3;Q06481-3;Q06481-6;Q06481;B4DKY3	Amyloid-like protein 2	APLP2	>sp|Q06481-5|APLP2_HUMAN Isoform 5 of Amyloid-like protein 2 OS=Homo sapiens GN=APLP2;>tr|F5H845|F5H845_HUMAN Amyloid-like protein 2 OS=Homo sapiens GN=APLP2 PE=1 SV=1;>tr|B4DTV1|B4DTV1_HUMAN cDNA FLJ55927, highly similar to Amyloid-like protein 2 (CDEIbox	1.8833	3	1.5464	NaN	NaN	0.646663	+	NaN		NaN		1	0.646663
O43752;O43752-2	Syntaxin-6	STX6	>sp|O43752|STX6_HUMAN Syntaxin-6 OS=Homo sapiens GN=STX6 PE=1 SV=1;>sp|O43752-2|STX6_HUMAN Isoform 2 of Syntaxin-6 OS=Homo sapiens GN=STX6	1.9077	3	NaN	NaN	1.4242	NaN		NaN		0.702149	+	1	0.702149
H7C5F7;B4DLX2;B4DGY6;H0Y8A7;Q9NV92	NEDD4 family-interacting protein 2	NDFIP2	>tr|H7C5F7|H7C5F7_HUMAN NEDD4 family-interacting protein 2 (Fragment) OS=Homo sapiens GN=NDFIP2 PE=4 SV=1;>tr|B4DLX2|B4DLX2_HUMAN cDNA FLJ52136, highly similar to NEDD4 family-interacting protein 2 OS=Homo sapiens PE=2 SV=1;>tr|B4DGY6|B4DGY6_HUMAN cDNA FLJ	1.9081	3	NaN	1.9704	NaN	NaN		0.507511	+	NaN		1	0.507511
H0YJ47;Q86U03;B4E3E1;Q86V28;O75843;Q86U41	AP-1 complex subunit gamma-like 2	AP1G2	>tr|H0YJ47|H0YJ47_HUMAN AP-1 complex subunit gamma-like 2 (Fragment) OS=Homo sapiens GN=AP1G2 PE=4 SV=1;>tr|Q86U03|Q86U03_HUMAN Full-length cDNA clone CS0DI003YF22 of Placenta of Homo sapiens (human) OS=Homo sapiens PE=2 SV=1;>tr|B4E3E1|B4E3E1_HUMAN cDNA F	1.929	3	1.929	NaN	NaN	0.518403	+	NaN		NaN		1	0.518403
C9JW17;B4DQD4;Q8WTW2;Q13287;A8K683	N-myc-interactor	NMI	>tr|C9JW17|C9JW17_HUMAN N-myc-interactor (Fragment) OS=Homo sapiens GN=NMI PE=4 SV=2;>tr|B4DQD4|B4DQD4_HUMAN cDNA FLJ58389, highly similar to N-myc-interactor OS=Homo sapiens PE=2 SV=1;>tr|Q8WTW2|Q8WTW2_HUMAN N-myc (And STAT) interactor OS=Homo sapiens GN=	1.9656	3	NaN	1.9736	NaN	NaN		0.506688	+	NaN		1	0.506688
Q5T4B6;P62328;A2VCK8	Thymosin beta-4;Hematopoietic system regulatory peptide	TMSB4XP4;TMSB4X	>tr|Q5T4B6|Q5T4B6_HUMAN HCG1780554 OS=Homo sapiens GN=TMSB4XP4 PE=4 SV=1;>sp|P62328|TYB4_HUMAN Thymosin beta-4 OS=Homo sapiens GN=TMSB4X PE=1 SV=2;>tr|A2VCK8|A2VCK8_HUMAN Thymosin beta 4, X-linked OS=Homo sapiens GN=TMSB4X PE=2 SV=1	1.9945	2	1.9945	NaN	NaN	0.501379	+	NaN		NaN		1	0.501379
E9PNW4;Q6FHM9;P13987;E9PR17	CD59 glycoprotein	CD59	>tr|E9PNW4|E9PNW4_HUMAN CD59 glycoprotein OS=Homo sapiens GN=CD59 PE=1 SV=1;>tr|Q6FHM9|Q6FHM9_HUMAN CD59 antigen, complement regulatory protein, isoform CRA_b OS=Homo sapiens GN=CD59 PE=2 SV=1;>sp|P13987|CD59_HUMAN CD59 glycoprotein OS=Homo sapiens GN=CD59	2.0109	4	NaN	NaN	2.1321	NaN		NaN		0.469021	+	1	0.469021
Q8TD55-2;Q8TD55	Pleckstrin homology domain-containing family O member 2	PLEKHO2	>sp|Q8TD55-2|PKHO2_HUMAN Isoform 2 of Pleckstrin homology domain-containing family O member 2 OS=Homo sapiens GN=PLEKHO2;>sp|Q8TD55|PKHO2_HUMAN Pleckstrin homology domain-containing family O member 2 OS=Homo sapiens GN=PLEKHO2 PE=2 SV=1	2.0156	4	4.0456	NaN	NaN	0.247182	+	NaN		NaN		1	0.247182
P01303;A4D158	Pro-neuropeptide Y;Neuropeptide Y;C-flanking peptide of NPY	NPY	>sp|P01303|NPY_HUMAN Pro-neuropeptide Y OS=Homo sapiens GN=NPY PE=1 SV=1;>tr|A4D158|A4D158_HUMAN Neuropeptide Y OS=Homo sapiens GN=NPY PE=2 SV=1	2.0884	5	NaN	NaN	1.7658	NaN		NaN		0.566316	+	1	0.566316
B4DL61;Q6MZV4;B4E1Z8;Q8IWE2;A0A024R9V7	Protein NOXP20	DKFZp686F20250;FAM114A1	>tr|B4DL61|B4DL61_HUMAN cDNA FLJ60291 OS=Homo sapiens PE=2 SV=1;>tr|Q6MZV4|Q6MZV4_HUMAN Protein NOXP20 OS=Homo sapiens GN=DKFZp686F20250 PE=1 SV=1;>tr|B4E1Z8|B4E1Z8_HUMAN cDNA FLJ60392 OS=Homo sapiens PE=2 SV=1;>sp|Q8IWE2|NXP20_HUMAN Protein NOXP20 OS=Homo	2.1049	3	NaN	2.2565	NaN	NaN		0.443164	+	NaN		1	0.443164
B4E3S6;P10643;B2R6W1;A8K2T4	Complement component C7	C7	>tr|B4E3S6|B4E3S6_HUMAN cDNA FLJ58413, highly similar to Complement component C7 OS=Homo sapiens PE=2 SV=1;>sp|P10643|CO7_HUMAN Complement component C7 OS=Homo sapiens GN=C7 PE=1 SV=2;>tr|B2R6W1|B2R6W1_HUMAN cDNA, FLJ93143, highly similar to Homo sapiens c	2.2242	3	NaN	2.2242	NaN	NaN		0.4496	+	NaN		1	0.4496
Q6LEE2;Q6FGB3;P61457	Pterin-4-alpha-carbinolamine dehydratase	PCBD1	>tr|Q6LEE2|Q6LEE2_HUMAN 4a-carbinolamine dehydratase (Fragment) OS=Homo sapiens PE=4 SV=1;>tr|Q6FGB3|Q6FGB3_HUMAN PCBD protein (Fragment) OS=Homo sapiens GN=PCBD PE=2 SV=1;>sp|P61457|PHS_HUMAN Pterin-4-alpha-carbinolamine dehydratase OS=Homo sapiens GN=PCB	2.2285	3	1.5036	NaN	NaN	0.66507	+	NaN		NaN		1	0.66507
Q8IWP6;M0R2D3;B4DNW1;M0R042;M0QYM7;M0R2T4			>tr|Q8IWP6|Q8IWP6_HUMAN Class IVb beta tubulin OS=Homo sapiens PE=2 SV=1	2.3945	3	NaN	2.3945	NaN	NaN		0.417624	+	NaN		1	0.417624
O60641-4;E9PDG8;H0UI15;O60641;F5GWN7;E5RGY9;O60641-3;B7Z2C2;B7Z2N2;H0YBT2	Clathrin coat assembly protein AP180	SNAP91	>sp|O60641-4|AP180_HUMAN Isoform 4 of Clathrin coat assembly protein AP180 OS=Homo sapiens GN=SNAP91;>tr|E9PDG8|E9PDG8_HUMAN Clathrin coat assembly protein AP180 OS=Homo sapiens GN=SNAP91 PE=4 SV=1;>tr|H0UI15|H0UI15_HUMAN Synaptosomal-associated protein, 9	2.4164	2	2.4164	NaN	NaN	0.413839	+	NaN		NaN		1	0.413839
Q8WUU5	GATA zinc finger domain-containing protein 1	GATAD1	>sp|Q8WUU5|GATD1_HUMAN GATA zinc finger domain-containing protein 1 OS=Homo sapiens GN=GATAD1 PE=1 SV=1	2.5281	2	2.5281	NaN	NaN	0.395554	+	NaN		NaN		1	0.395554
O60462-6;A8K4G9;O60462-4;A0A024R412;O60462-5;O60462-2;F5H2X3;A0A024R3W6;X5D7M1;Q7LBX6;O60462-3;F5H1G4;B7ZL68;X5D2Q8;Q7Z3T9;O60462	Neuropilin-2	NRP2;DKFZp686J1169	>sp|O60462-6|NRP2_HUMAN Isoform s9 of Neuropilin-2 OS=Homo sapiens GN=NRP2;>tr|A8K4G9|A8K4G9_HUMAN cDNA FLJ75267, highly similar to Homo sapiens neuropilin-2 soluble isoform 9 (NRP2) mRNA OS=Homo sapiens PE=2 SV=1;>sp|O60462-4|NRP2_HUMAN Isoform B0 of Neur	2.5543	3	NaN	3.3872	NaN	NaN		0.295229	+	NaN		1	0.295229
E5RJF5;E5RI05;E5RK63;P08133-2;A6NN80;P08133;A8K3Q7	Annexin;Annexin A6	ANXA6	>tr|E5RJF5|E5RJF5_HUMAN Annexin (Fragment) OS=Homo sapiens GN=ANXA6 PE=1 SV=2;>tr|E5RI05|E5RI05_HUMAN Annexin OS=Homo sapiens GN=ANXA6 PE=1 SV=1;>tr|E5RK63|E5RK63_HUMAN Annexin (Fragment) OS=Homo sapiens GN=ANXA6 PE=1 SV=1;>sp|P08133-2|ANXA6_HUMAN Isoform	2.5563	4	NaN	1.8516	NaN	NaN		0.540073	+	NaN		1	0.540073
Q9NV56	MRG/MORF4L-binding protein	MRGBP	>sp|Q9NV56|MRGBP_HUMAN MRG/MORF4L-binding protein OS=Homo sapiens GN=MRGBP PE=1 SV=1	3.0183	3	1.9726	NaN	NaN	0.506945	+	NaN		NaN		1	0.506945
P63218	Guanine nucleotide-binding protein G(I)/G(S)/G(O) subunit gamma-5	GNG5	>sp|P63218|GBG5_HUMAN Guanine nucleotide-binding protein G(I)/G(S)/G(O) subunit gamma-5 OS=Homo sapiens GN=GNG5 PE=1 SV=3	3.379	3	NaN	3.4909	NaN	NaN		0.286459	+	NaN		1	0.286459
O14613;B3KUZ5	Cdc42 effector protein 2	CDC42EP2	>sp|O14613|BORG1_HUMAN Cdc42 effector protein 2 OS=Homo sapiens GN=CDC42EP2 PE=1 SV=1;>tr|B3KUZ5|B3KUZ5_HUMAN cDNA FLJ40973 fis, clone UTERU2013280, highly similar to Cdc42 effector protein 2 OS=Homo sapiens PE=2 SV=1	3.9172	3	NaN	3.135	NaN	NaN		0.318979	+	NaN		1	0.318979
Q8NCE2-2;Q8NCE2;B4DJ23;Q8WYY9;Q8NCE2-3	Myotubularin-related protein 14	MTMR14	>sp|Q8NCE2-2|MTMRE_HUMAN Isoform 2 of Myotubularin-related protein 14 OS=Homo sapiens GN=MTMR14;>sp|Q8NCE2|MTMRE_HUMAN Myotubularin-related protein 14 OS=Homo sapiens GN=MTMR14 PE=1 SV=2;>tr|B4DJ23|B4DJ23_HUMAN Myotubularin-related protein 14 OS=Homo sapie	4.6639	4	5.4271	NaN	NaN	0.18426	+	NaN		NaN		1	0.18426
A6NJ78;A6NJ78-2	Probable methyltransferase-like protein 15	METTL15	>sp|A6NJ78|MET15_HUMAN Probable methyltransferase-like protein 15 OS=Homo sapiens GN=METTL15 PE=2 SV=1;>sp|A6NJ78-2|MET15_HUMAN Isoform 2 of Probable methyltransferase-like protein 15 OS=Homo sapiens GN=METTL15	7.092	3	3.1922	NaN	NaN	0.313264	+	NaN		NaN		1	0.313264
P15172;B2RC72	Myoblast determination protein 1	MYOD1	>sp|P15172|MYOD1_HUMAN Myoblast determination protein 1 OS=Homo sapiens GN=MYOD1 PE=1 SV=3;>tr|B2RC72|B2RC72_HUMAN cDNA, FLJ95884, highly similar to Homo sapiens myogenic factor 3 (MYOD1), mRNA OS=Homo sapiens PE=2 SV=1	0.029191	3	NaN	NaN	NaN	NaN		NaN		NaN		0	#NUM!
Q8TBM8	DnaJ homolog subfamily B member 14	DNAJB14	>sp|Q8TBM8|DJB14_HUMAN DnaJ homolog subfamily B member 14 OS=Homo sapiens GN=DNAJB14 PE=2 SV=1	0.18154	2	NaN	NaN	NaN	NaN		NaN		NaN		0	#NUM!
Q09028-2	Histone-binding protein RBBP4	RBBP4	>sp|Q09028-2|RBBP4_HUMAN Isoform 2 of Histone-binding protein RBBP4 OS=Homo sapiens GN=RBBP4	0.26124	2	NaN	NaN	NaN	NaN		NaN		NaN		0	#NUM!
Q9NYV4-2;J3QSD7;Q9NYV4-3;Q9NYV4;B3KX76;Q8IWB3;H0YAZ9;Q9BWF9;Q9BVE2;E7EUK8;B4DK59;Q96Q40-2;B4DHU6;Q96Q40-4;B4DER5;E5RGN0;Q96GA5;Q96Q40-3;O94921-3;Q96Q40-5;Q96Q40;Q59G02;Q9BRL4;O94921-2;O94921;F5H6Z0;B4DGP5;Q07002;Q07002-2;A0A024R996;Q00536;Q00536-3;A0A024R183;Q07002-3;B4DK03;A0A024R980;Q00537-2;Q00537;A0A024RBH0;Q00536-2;B7Z8T0	Cyclin-dependent kinase 12	CDK12	>sp|Q9NYV4-2|CDK12_HUMAN Isoform 2 of Cyclin-dependent kinase 12 OS=Homo sapiens GN=CDK12;>tr|J3QSD7|J3QSD7_HUMAN Cyclin-dependent kinase 12 (Fragment) OS=Homo sapiens GN=CDK12 PE=1 SV=1;>sp|Q9NYV4-3|CDK12_HUMAN Isoform 3 of Cyclin-dependent kinase 12 OS=H	0.293	2	NaN	NaN	NaN	NaN		NaN		NaN		0	#NUM!
Q9ULK4-6;Q9ULK4-2;F5H685;Q9ULK4-4;Q9ULK4-5;Q9ULK4-3;Q9ULK4;Q5JWT2;H7BYY3;Q05DL5;B9TX49	Mediator of RNA polymerase II transcription subunit 23	MED23	>sp|Q9ULK4-6|MED23_HUMAN Isoform 6 of Mediator of RNA polymerase II transcription subunit 23 OS=Homo sapiens GN=MED23;>sp|Q9ULK4-2|MED23_HUMAN Isoform 2 of Mediator of RNA polymerase II transcription subunit 23 OS=Homo sapiens GN=MED23;>tr|F5H685|F5H685_HU	0.31442	2	NaN	NaN	NaN	NaN		NaN		NaN		0	#NUM!
C9J7B1;C9K068;H7C333;O75323-2;O75323	Protein NipSnap homolog 2	GBAS	>tr|C9J7B1|C9J7B1_HUMAN Protein NipSnap homolog 2 (Fragment) OS=Homo sapiens GN=GBAS PE=1 SV=1;>tr|C9K068|C9K068_HUMAN Protein NipSnap homolog 2 (Fragment) OS=Homo sapiens GN=GBAS PE=1 SV=2;>tr|H7C333|H7C333_HUMAN Protein NipSnap homolog 2 (Fragment) OS=Ho	0.33398	3	NaN	NaN	NaN	NaN		NaN		NaN		0	#NUM!
P08572;A0A024RDW8;B4DH43	Collagen alpha-2(IV) chain;Canstatin	COL4A2	>sp|P08572|CO4A2_HUMAN Collagen alpha-2(IV) chain OS=Homo sapiens GN=COL4A2 PE=1 SV=4;>tr|A0A024RDW8|A0A024RDW8_HUMAN Collagen, type IV, alpha 2, isoform CRA_a OS=Homo sapiens GN=COL4A2 PE=4 SV=1;>tr|B4DH43|B4DH43_HUMAN cDNA FLJ56433, highly similar to Col	0.37285	3	NaN	0.98746	NaN	NaN		1.0127		NaN		0	1.0127
P51608-2;I6LM39;D6QZ43;C6KG44;E1B2J3;P51608;E9LUH3;D9ZNA4;D5L9I5;D3YJ43;D0UU70;A8K079;E9LUH4	Methyl-CpG-binding protein 2	MECP2	>sp|P51608-2|MECP2_HUMAN Isoform B of Methyl-CpG-binding protein 2 OS=Homo sapiens GN=MECP2;>tr|I6LM39|I6LM39_HUMAN Mutant methyl CpG binding protein 2 OS=Homo sapiens GN=MECP2 PE=2 SV=1;>tr|D6QZ43|D6QZ43_HUMAN Mutant methyl CpG binding protein 2 OS=Homo s	0.3953	2	NaN	NaN	NaN	NaN		NaN		NaN		0	#NUM!
V9HWB2;Q14353	Guanidinoacetate N-methyltransferase	GAMT	>tr|V9HWB2|V9HWB2_HUMAN Epididymis secretory protein Li 20 OS=Homo sapiens GN=HEL-S-20 PE=2 SV=1;>sp|Q14353|GAMT_HUMAN Guanidinoacetate N-methyltransferase OS=Homo sapiens GN=GAMT PE=1 SV=1	0.39758	3	NaN	NaN	0.91414	NaN		NaN		1.09392		0	1.09392
O15075-2;O15075;O15075-3;O15075-4;B7Z5K4	Serine/threonine-protein kinase DCLK1	DCLK1	>sp|O15075-2|DCLK1_HUMAN Isoform 1 of Serine/threonine-protein kinase DCLK1 OS=Homo sapiens GN=DCLK1;>sp|O15075|DCLK1_HUMAN Serine/threonine-protein kinase DCLK1 OS=Homo sapiens GN=DCLK1 PE=1 SV=2	0.40366	3	NaN	NaN	NaN	NaN		NaN		NaN		0	#NUM!
S4R3V1;S4R3D7;Q9BPX6-2;Q9BPX6;H9KVB8;Q9BPX6-3;F6XEV2	Calcium uptake protein 1, mitochondrial	MICU1	>tr|S4R3V1|S4R3V1_HUMAN Calcium uptake protein 1, mitochondrial (Fragment) OS=Homo sapiens GN=MICU1 PE=4 SV=2;>tr|S4R3D7|S4R3D7_HUMAN Calcium uptake protein 1, mitochondrial (Fragment) OS=Homo sapiens GN=MICU1 PE=4 SV=1;>sp|Q9BPX6-2|MICU1_HUMAN Isoform 2 o	0.40408	2	NaN	NaN	NaN	NaN		NaN		NaN		0	#NUM!
Q9UJY4	ADP-ribosylation factor-binding protein GGA2	GGA2	>sp|Q9UJY4|GGA2_HUMAN ADP-ribosylation factor-binding protein GGA2 OS=Homo sapiens GN=GGA2 PE=1 SV=3	0.42862	3	NaN	NaN	NaN	NaN		NaN		NaN		0	#NUM!
O43692	Peptidase inhibitor 15	PI15	>sp|O43692|PI15_HUMAN Peptidase inhibitor 15 OS=Homo sapiens GN=PI15 PE=1 SV=1	0.43279	3	NaN	NaN	NaN	NaN		NaN		NaN		0	#NUM!
C9J2P0;H7C061;P51965-2;B7Z306;P51965;A0A024R2K3	Ubiquitin-conjugating enzyme E2 E1	UBE2E1	>tr|C9J2P0|C9J2P0_HUMAN Ubiquitin-conjugating enzyme E2 E1 (Fragment) OS=Homo sapiens GN=UBE2E1 PE=1 SV=1;>tr|H7C061|H7C061_HUMAN Ubiquitin-conjugating enzyme E2 E1 (Fragment) OS=Homo sapiens GN=UBE2E1 PE=1 SV=1;>sp|P51965-2|UB2E1_HUMAN Isoform 2 of Ubiqui	0.45653	3	NaN	NaN	NaN	NaN		NaN		NaN		0	#NUM!
Q6IA86-4;Q6IA86-7;Q6IA86-2;Q6IA86-3;Q6IA86-5;Q6IA86;Q6IA86-6	Elongator complex protein 2	ELP2	>sp|Q6IA86-4|ELP2_HUMAN Isoform 4 of Elongator complex protein 2 OS=Homo sapiens GN=ELP2;>sp|Q6IA86-7|ELP2_HUMAN Isoform 7 of Elongator complex protein 2 OS=Homo sapiens GN=ELP2;>sp|Q6IA86-2|ELP2_HUMAN Isoform 2 of Elongator complex protein 2 OS=Homo sapie	0.47476	2	NaN	NaN	NaN	NaN		NaN		NaN		0	#NUM!
A8K3D5;H0Y6I0;Q13439-3;Q13439-4;Q13439;Q13439-5;Q49A56;E7EVX2;B4DTF3;C9JHJ5;Q9H2G3	Golgin subfamily A member 4	GOLGA4	>tr|A8K3D5|A8K3D5_HUMAN cDNA FLJ77065, highly similar to Homo sapiens golgi autoantigen, golgin subfamily a, 4 (GOLGA4), mRNA (Fragment) OS=Homo sapiens PE=2 SV=1;>tr|H0Y6I0|H0Y6I0_HUMAN Golgin subfamily A member 4 (Fragment) OS=Homo sapiens GN=GOLGA4 PE=1	0.49115	2	NaN	NaN	NaN	NaN		NaN		NaN		0	#NUM!
H0Y6D8;Q32MN6;B4DPC1;P20226-2;Q5U0C8;Q32MN7;P20226	TATA-box-binding protein	TBP	>tr|H0Y6D8|H0Y6D8_HUMAN TATA-box-binding protein (Fragment) OS=Homo sapiens GN=TBP PE=1 SV=1;>tr|Q32MN6|Q32MN6_HUMAN TBP protein OS=Homo sapiens GN=TBP PE=2 SV=1;>tr|B4DPC1|B4DPC1_HUMAN cDNA FLJ51920, highly similar to TATA-box-binding protein OS=Homo sapi	0.49258	2	NaN	NaN	NaN	NaN		NaN		NaN		0	#NUM!
Q68CP0;Q96JM2;Q63HJ5;Q96JM2-3;Q96JM2-2;H3BLX4	Zinc finger protein 462	DKFZp686B2325;ZNF462;DKFZp686L2367	>tr|Q68CP0|Q68CP0_HUMAN Putative uncharacterized protein DKFZp686B2325 (Fragment) OS=Homo sapiens GN=DKFZp686B2325 PE=2 SV=1;>sp|Q96JM2|ZN462_HUMAN Zinc finger protein 462 OS=Homo sapiens GN=ZNF462 PE=1 SV=3;>tr|Q63HJ5|Q63HJ5_HUMAN Putative uncharacterized	0.50111	2	NaN	NaN	NaN	NaN		NaN		NaN		0	#NUM!
Q92792;Q9Y217-2;Q9Y217	Myotubularin-related protein 6	MTMR6	>tr|Q92792|Q92792_HUMAN D13S824E locus (Fragment) OS=Homo sapiens PE=2 SV=1;>sp|Q9Y217-2|MTMR6_HUMAN Isoform 2 of Myotubularin-related protein 6 OS=Homo sapiens GN=MTMR6;>sp|Q9Y217|MTMR6_HUMAN Myotubularin-related protein 6 OS=Homo sapiens GN=MTMR6 PE=1 SV	0.50793	2	NaN	NaN	NaN	NaN		NaN		NaN		0	#NUM!
O76038	Secretagogin	SCGN	>sp|O76038|SEGN_HUMAN Secretagogin OS=Homo sapiens GN=SCGN PE=1 SV=2	0.50806	2	NaN	NaN	NaN	NaN		NaN		NaN		0	#NUM!
P50281;K4RH61;B2R6P3	Matrix metalloproteinase-14	MMP14	>sp|P50281|MMP14_HUMAN Matrix metalloproteinase-14 OS=Homo sapiens GN=MMP14 PE=1 SV=3;>tr|K4RH61|K4RH61_HUMAN Matrix metalloproteinase 14 (Membrane-inserted) OS=Homo sapiens GN=MMP14 PE=2 SV=1;>tr|B2R6P3|B2R6P3_HUMAN cDNA, FLJ93047, highly similar to Homo	0.51688	3	NaN	NaN	NaN	NaN		NaN		NaN		0	#NUM!
Q53T09		XRCC5	>tr|Q53T09|Q53T09_HUMAN Putative uncharacterized protein XRCC5 (Fragment) OS=Homo sapiens GN=XRCC5 PE=4 SV=1	0.51856	3	NaN	NaN	NaN	NaN		NaN		NaN		0	#NUM!
Q7Z7H5-3;Q7Z7H5-2;Q7Z7H5	Transmembrane emp24 domain-containing protein 4	TMED4	>sp|Q7Z7H5-3|TMED4_HUMAN Isoform 3 of Transmembrane emp24 domain-containing protein 4 OS=Homo sapiens GN=TMED4;>sp|Q7Z7H5-2|TMED4_HUMAN Isoform 2 of Transmembrane emp24 domain-containing protein 4 OS=Homo sapiens GN=TMED4;>sp|Q7Z7H5|TMED4_HUMAN Transmembra	0.53417	3	NaN	NaN	NaN	NaN		NaN		NaN		0	#NUM!
P06737-2;E9PK47;P06737;B2R825;Q6P1L4	Glycogen phosphorylase, liver form;Phosphorylase	PYGL	>sp|P06737-2|PYGL_HUMAN Isoform 2 of Glycogen phosphorylase, liver form OS=Homo sapiens GN=PYGL;>tr|E9PK47|E9PK47_HUMAN Phosphorylase OS=Homo sapiens GN=PYGL PE=1 SV=1;>sp|P06737|PYGL_HUMAN Glycogen phosphorylase, liver form OS=Homo sapiens GN=PYGL PE=1 SV	0.542	3	NaN	NaN	NaN	NaN		NaN		NaN		0	#NUM!
O95136;A0A024R7B2	Sphingosine 1-phosphate receptor 2	S1PR2	>sp|O95136|S1PR2_HUMAN Sphingosine 1-phosphate receptor 2 OS=Homo sapiens GN=S1PR2 PE=2 SV=2;>tr|A0A024R7B2|A0A024R7B2_HUMAN Endothelial differentiation, sphingolipid G-protein-coupled receptor, 5, isoform CRA_a OS=Homo sapiens GN=EDG5 PE=3 SV=1	0.54897	2	NaN	NaN	NaN	NaN		NaN		NaN		0	#NUM!
K7EPA4		DUS3L	>tr|K7EPA4|K7EPA4_HUMAN tRNA-dihydrouridine(47) synthase [NAD(P)(+)]-like (Fragment) OS=Homo sapiens GN=DUS3L PE=1 SV=1	0.55473	2	NaN	NaN	NaN	NaN		NaN		NaN		0	#NUM!
H7C2U8;Q9H0X4	Protein ITFG3	ITFG3	>tr|H7C2U8|H7C2U8_HUMAN Protein ITFG3 (Fragment) OS=Homo sapiens GN=ITFG3 PE=4 SV=1;>sp|Q9H0X4|ITFG3_HUMAN Protein ITFG3 OS=Homo sapiens GN=ITFG3 PE=1 SV=1	0.556	2	NaN	NaN	NaN	NaN		NaN		NaN		0	#NUM!
C9JPK3;C9K0E4;C9JCY1;C9JQS3;E9PFI2;B4DKF6;Q9Y2K9	Syntaxin-binding protein 5-like	STXBP5L	>tr|C9JPK3|C9JPK3_HUMAN Syntaxin-binding protein 5-like OS=Homo sapiens GN=STXBP5L PE=1 SV=1;>tr|C9K0E4|C9K0E4_HUMAN Syntaxin-binding protein 5-like OS=Homo sapiens GN=STXBP5L PE=1 SV=1;>tr|C9JCY1|C9JCY1_HUMAN Syntaxin-binding protein 5-like OS=Homo sapien	0.5649	2	NaN	NaN	NaN	NaN		NaN		NaN		0	#NUM!
P51946;D6RHI7;D6RG18;Q59FW7;A8K6Q5	Cyclin-H	CCNH	>sp|P51946|CCNH_HUMAN Cyclin-H OS=Homo sapiens GN=CCNH PE=1 SV=1;>tr|D6RHI7|D6RHI7_HUMAN Uncharacterized protein OS=Homo sapiens GN=CCNH PE=1 SV=1;>tr|D6RG18|D6RG18_HUMAN Cyclin-H OS=Homo sapiens GN=CCNH PE=1 SV=1;>tr|Q59FW7|Q59FW7_HUMAN Cyclin H variant (	0.56635	3	NaN	NaN	NaN	NaN		NaN		NaN		0	#NUM!
J3KQP8;X6R9N0;Q7Z6K3	Protein prenyltransferase alpha subunit repeat-containing protein 1	PTAR1	>tr|J3KQP8|J3KQP8_HUMAN Protein prenyltransferase alpha subunit repeat-containing protein 1 (Fragment) OS=Homo sapiens GN=PTAR1 PE=4 SV=1;>tr|X6R9N0|X6R9N0_HUMAN Protein prenyltransferase alpha subunit repeat-containing protein 1 OS=Homo sapiens GN=PTAR1 P	0.57427	2	NaN	NaN	NaN	NaN		NaN		NaN		0	#NUM!
B7Z2K7;Q15418-3;E9PRI4;E9PGT3;Q15418;Q15418-2	Ribosomal protein S6 kinase alpha-1;Ribosomal protein S6 kinase	RPS6KA1	>tr|B7Z2K7|B7Z2K7_HUMAN cDNA FLJ53289, highly similar to Ribosomal protein S6 kinase alpha-1 (EC 2.7.11.1) OS=Homo sapiens PE=2 SV=1;>sp|Q15418-3|KS6A1_HUMAN Isoform 3 of Ribosomal protein S6 kinase alpha-1 OS=Homo sapiens GN=RPS6KA1;>tr|E9PRI4|E9PRI4_HUMA	0.5793	2	NaN	NaN	NaN	NaN		NaN		NaN		0	#NUM!
K7EQB1;Q9UNK0	Syntaxin-8	STX8	>tr|K7EQB1|K7EQB1_HUMAN Syntaxin-8 OS=Homo sapiens GN=STX8 PE=1 SV=1;>sp|Q9UNK0|STX8_HUMAN Syntaxin-8 OS=Homo sapiens GN=STX8 PE=1 SV=2	0.58099	2	NaN	NaN	NaN	NaN		NaN		NaN		0	#NUM!
Q59EK9;Q59EK9-4;Q59EK9-2;Q59EK9-3	RUN domain-containing protein 3A	RUNDC3A	>sp|Q59EK9|RUN3A_HUMAN RUN domain-containing protein 3A OS=Homo sapiens GN=RUNDC3A PE=2 SV=2;>sp|Q59EK9-4|RUN3A_HUMAN Isoform 4 of RUN domain-containing protein 3A OS=Homo sapiens GN=RUNDC3A;>sp|Q59EK9-2|RUN3A_HUMAN Isoform 2 of RUN domain-containing prote	0.58313	2	NaN	NaN	NaN	NaN		NaN		NaN		0	#NUM!
O00560-3;O00560;A0A024R7Z5;B4DHN5;E9PBU7;B4DQ93	Syntenin-1	SDCBP	>sp|O00560-3|SDCB1_HUMAN Isoform 3 of Syntenin-1 OS=Homo sapiens GN=SDCBP;>sp|O00560|SDCB1_HUMAN Syntenin-1 OS=Homo sapiens GN=SDCBP PE=1 SV=1;>tr|A0A024R7Z5|A0A024R7Z5_HUMAN Syndecan binding protein (Syntenin), isoform CRA_c OS=Homo sapiens GN=SDCBP PE=4	0.58331	3	NaN	NaN	NaN	NaN		NaN		NaN		0	#NUM!
B8ZZS4;Q9H8Y5;A0A024R464;B4E0V1;B4DZT1	Ankyrin repeat and zinc finger domain-containing protein 1	ANKZF1	>tr|B8ZZS4|B8ZZS4_HUMAN Ankyrin repeat and zinc finger domain-containing protein 1 OS=Homo sapiens GN=ANKZF1 PE=1 SV=1;>sp|Q9H8Y5|ANKZ1_HUMAN Ankyrin repeat and zinc finger domain-containing protein 1 OS=Homo sapiens GN=ANKZF1 PE=1 SV=1;>tr|A0A024R464|A0A0	0.5859	2	NaN	NaN	NaN	NaN		NaN		NaN		0	#NUM!
B7Z8A5;B7ZAI3;B4E014;Q9UBD5;Q9UBD5-2;U3KQL3;Q6IBJ0;Q9UBD5-3	Origin recognition complex subunit 3	ORC3;ORC3L	>tr|B7Z8A5|B7Z8A5_HUMAN cDNA FLJ56522, highly similar to Origin recognition complex subunit 3 OS=Homo sapiens PE=2 SV=1;>tr|B7ZAI3|B7ZAI3_HUMAN cDNA, FLJ79197, highly similar to Origin recognition complex subunit 3 OS=Homo sapiens PE=2 SV=1;>tr|B4E014|B4E0	0.58969	3	NaN	NaN	NaN	NaN		NaN		NaN		0	#NUM!
Q70IA6-2;B4DTJ1;B4DKJ9;Q70IA6;Q70IA6-3	MOB kinase activator 2	MOB2	>sp|Q70IA6-2|MOB2_HUMAN Isoform 2 of MOB kinase activator 2 OS=Homo sapiens GN=MOB2;>tr|B4DTJ1|B4DTJ1_HUMAN cDNA FLJ59980, highly similar to Mps one binder kinase activator-like 2 OS=Homo sapiens PE=2 SV=1;>tr|B4DKJ9|B4DKJ9_HUMAN cDNA FLJ60639, highly simi	0.59416	3	NaN	NaN	NaN	NaN		NaN		NaN		0	#NUM!
C9JDE9;P09110;A0A024R2M6;Q8NCW8;B4DEN6;F2Z2Q6;F2Z3P7;B4E072;O43203;B4DVF4;H0Y4D4;H7C131;P09110-2	3-ketoacyl-CoA thiolase, peroxisomal	ACAA1	>tr|C9JDE9|C9JDE9_HUMAN 3-ketoacyl-CoA thiolase, peroxisomal OS=Homo sapiens GN=ACAA1 PE=1 SV=1;>sp|P09110|THIK_HUMAN 3-ketoacyl-CoA thiolase, peroxisomal OS=Homo sapiens GN=ACAA1 PE=1 SV=2;>tr|A0A024R2M6|A0A024R2M6_HUMAN Acetyl-Coenzyme A acyltransferase	0.59601	2	NaN	NaN	NaN	NaN		NaN		NaN		0	#NUM!
C9K0D3;P58340-2;C9J3M3;Q2TLE4;P58340-5;Q5HYH4;P58340-4;P58340;B2RD48;P58340-3	Myeloid leukemia factor 1	MLF1;DKFZp313B1621	>tr|C9K0D3|C9K0D3_HUMAN Myeloid leukemia factor 1 (Fragment) OS=Homo sapiens GN=MLF1 PE=4 SV=1;>sp|P58340-2|MLF1_HUMAN Isoform 2 of Myeloid leukemia factor 1 OS=Homo sapiens GN=MLF1;>tr|C9J3M3|C9J3M3_HUMAN Myeloid leukemia factor 1 (Fragment) OS=Homo sapie	0.60422	2	NaN	NaN	NaN	NaN		NaN		NaN		0	#NUM!
Q6FGG4;O95167;H7C0D7;S4R3I5;H7C2R1;A8MVM8;S4R3T6;A8MYJ8	NADH dehydrogenase [ubiquinone] 1 alpha subcomplex subunit 3	NDUFA3	>tr|Q6FGG4|Q6FGG4_HUMAN NADH dehydrogenase (Ubiquinone) 1 alpha subcomplex, 3, 9kDa, isoform CRA_e OS=Homo sapiens GN=NDUFA3 PE=2 SV=1;>sp|O95167|NDUA3_HUMAN NADH dehydrogenase [ubiquinone] 1 alpha subcomplex subunit 3 OS=Homo sapiens GN=NDUFA3 PE=1 SV=1;>	0.60718	2	NaN	NaN	NaN	NaN		NaN		NaN		0	#NUM!
Q08379-2;Q08379	Golgin subfamily A member 2	GOLGA2	>sp|Q08379-2|GOGA2_HUMAN Isoform 2 of Golgin subfamily A member 2 OS=Homo sapiens GN=GOLGA2;>sp|Q08379|GOGA2_HUMAN Golgin subfamily A member 2 OS=Homo sapiens GN=GOLGA2 PE=1 SV=3	0.60904	2	NaN	NaN	NaN	NaN		NaN		NaN		0	#NUM!
B5MD17;J3KS05;Q6IBN6;P83916	Chromobox protein homolog 1	CBX1	>tr|B5MD17|B5MD17_HUMAN Chromobox protein homolog 1 (Fragment) OS=Homo sapiens GN=CBX1 PE=1 SV=1;>tr|J3KS05|J3KS05_HUMAN Chromobox protein homolog 1 (Fragment) OS=Homo sapiens GN=CBX1 PE=1 SV=2;>tr|Q6IBN6|Q6IBN6_HUMAN CBX1 protein OS=Homo sapiens GN=CBX1 P	0.61967	2	NaN	NaN	NaN	NaN		NaN		NaN		0	#NUM!
K7ER58;Q6P6C2-3;Q6P6C2	RNA demethylase ALKBH5	ALKBH5	>tr|K7ER58|K7ER58_HUMAN RNA demethylase ALKBH5 OS=Homo sapiens GN=ALKBH5 PE=1 SV=1;>sp|Q6P6C2-3|ALKB5_HUMAN Isoform 3 of RNA demethylase ALKBH5 OS=Homo sapiens GN=ALKBH5;>sp|Q6P6C2|ALKB5_HUMAN RNA demethylase ALKBH5 OS=Homo sapiens GN=ALKBH5 PE=1 SV=2	0.62519	3	NaN	NaN	NaN	NaN		NaN		NaN		0	#NUM!
Q9UIU6	Homeobox protein SIX4	SIX4	>sp|Q9UIU6|SIX4_HUMAN Homeobox protein SIX4 OS=Homo sapiens GN=SIX4 PE=1 SV=2	0.62625	2	NaN	NaN	NaN	NaN		NaN		NaN		0	#NUM!
Q9ULE4	Protein FAM184B	FAM184B	>sp|Q9ULE4|F184B_HUMAN Protein FAM184B OS=Homo sapiens GN=FAM184B PE=2 SV=3	0.62628	3	NaN	NaN	NaN	NaN		NaN		NaN		0	#NUM!
O75157-2;O75157;Q5JRJ0;Q99576-4;B4DN36;E7EWD5;Q99576;Q15714-2;A8K3Y6;A0A024RDV8;B4DU81;Q99576-3;H0Y865;B4DMB2;Q15714-3;Q15714	TSC22 domain family protein 2;TSC22 domain family protein 3;TSC22 domain family protein 1	TSC22D2;TSC22D3;TSC22D1	>sp|O75157-2|T22D2_HUMAN Isoform 2 of TSC22 domain family protein 2 OS=Homo sapiens GN=TSC22D2;>sp|O75157|T22D2_HUMAN TSC22 domain family protein 2 OS=Homo sapiens GN=TSC22D2 PE=1 SV=3;>tr|Q5JRJ0|Q5JRJ0_HUMAN TSC22 domain family protein 3 OS=Homo sapiens G	0.62918	2	NaN	NaN	NaN	NaN		NaN		NaN		0	#NUM!
Q96HR9;A8MXN1;A8MWX0;B4DF39	Receptor expression-enhancing protein 6	REEP6	>sp|Q96HR9|REEP6_HUMAN Receptor expression-enhancing protein 6 OS=Homo sapiens GN=REEP6 PE=1 SV=1;>tr|A8MXN1|A8MXN1_HUMAN Receptor expression-enhancing protein 6 (Fragment) OS=Homo sapiens GN=REEP6 PE=1 SV=2;>tr|A8MWX0|A8MWX0_HUMAN Receptor expression-enha	0.63148	2	NaN	NaN	NaN	NaN		NaN		NaN		0	#NUM!
Q9UII4	E3 ISG15--protein ligase HERC5	HERC5	>sp|Q9UII4|HERC5_HUMAN E3 ISG15--protein ligase HERC5 OS=Homo sapiens GN=HERC5 PE=1 SV=2	0.63247	2	NaN	NaN	NaN	NaN		NaN		NaN		0	#NUM!
Q9NXN4-2;Q9NXN4	Ganglioside-induced differentiation-associated protein 2	GDAP2	>sp|Q9NXN4-2|GDAP2_HUMAN Isoform 2 of Ganglioside-induced differentiation-associated protein 2 OS=Homo sapiens GN=GDAP2;>sp|Q9NXN4|GDAP2_HUMAN Ganglioside-induced differentiation-associated protein 2 OS=Homo sapiens GN=GDAP2 PE=1 SV=1	0.63842	2	NaN	NaN	NaN	NaN		NaN		NaN		0	#NUM!
J7M2B1;Q6PJT4;V9HWC0;P26038;Q9UJU1;Q9UJZ2;Q9UJZ6;Q9UK20;V9GZ54;Q9UJZ8;Q9UJZ7;A9YLN6;M1VE83;M1VRM8;A9YLN4;A9YLN5;M1VKI3;M1VPF6;M1V485;M1VE86;M1V487;Q5H8Y1;P08922	Tyrosine-protein kinase receptor	EZR-ROS1	>tr|J7M2B1|J7M2B1_HUMAN Tyrosine-protein kinase receptor OS=Homo sapiens GN=EZR-ROS1 PE=2 SV=1	0.64184	3	NaN	NaN	NaN	NaN		NaN		NaN		0	#NUM!
Q8NC95;Q9NZU0	Leucine-rich repeat transmembrane protein FLRT3	FLRT3	>tr|Q8NC95|Q8NC95_HUMAN cDNA FLJ90402 fis, clone NT2RP2006004, highly similar to Leucine-rich repeat transmembrane protein FLRT3 OS=Homo sapiens PE=2 SV=1;>sp|Q9NZU0|FLRT3_HUMAN Leucine-rich repeat transmembrane protein FLRT3 OS=Homo sapiens GN=FLRT3 PE=1	0.64682	2	NaN	NaN	NaN	NaN		NaN		NaN		0	#NUM!
Q8WUD1;B4DUD4;Q5HYI5;Q8WUD1-2;Q96K32	Ras-related protein Rab-2B	RAB2B;DKFZp313C1541	>sp|Q8WUD1|RAB2B_HUMAN Ras-related protein Rab-2B OS=Homo sapiens GN=RAB2B PE=1 SV=1;>tr|B4DUD4|B4DUD4_HUMAN cDNA FLJ59988, highly similar to Ras-related protein Rab-2B OS=Homo sapiens PE=2 SV=1;>tr|Q5HYI5|Q5HYI5_HUMAN Putative uncharacterized protein DKFZ	0.64873	2	NaN	NaN	NaN	NaN		NaN		NaN		0	#NUM!
B3KPD3;Q9NQS7-2;Q9NQS7	Inner centromere protein	INCENP	>tr|B3KPD3|B3KPD3_HUMAN cDNA FLJ31633 fis, clone NT2RI2003407, highly similar to Inner centromere protein (Fragment) OS=Homo sapiens PE=2 SV=1;>sp|Q9NQS7-2|INCE_HUMAN Isoform 2 of Inner centromere protein OS=Homo sapiens GN=INCENP;>sp|Q9NQS7|INCE_HUMAN Inn	0.65073	2	NaN	NaN	NaN	NaN		NaN		NaN		0	#NUM!
Q15560-2;Q6IB64;Q15560;Q5JRI7;Q86VL0	Transcription elongation factor A protein 2	TCEA2	>sp|Q15560-2|TCEA2_HUMAN Isoform 2 of Transcription elongation factor A protein 2 OS=Homo sapiens GN=TCEA2;>tr|Q6IB64|Q6IB64_HUMAN TCEA2 protein OS=Homo sapiens GN=TCEA2 PE=2 SV=1;>sp|Q15560|TCEA2_HUMAN Transcription elongation factor A protein 2 OS=Homo s	0.65826	3	NaN	NaN	NaN	NaN		NaN		NaN		0	#NUM!
Q96H44;Q969Y2-3;Q969Y2;Q969Y2-4;Q969Y2-2	tRNA modification GTPase GTPBP3, mitochondrial	GTPBP3	>tr|Q96H44|Q96H44_HUMAN GTPBP3 protein (Fragment) OS=Homo sapiens GN=GTPBP3 PE=2 SV=3;>sp|Q969Y2-3|GTPB3_HUMAN Isoform 3 of tRNA modification GTPase GTPBP3, mitochondrial OS=Homo sapiens GN=GTPBP3;>sp|Q969Y2|GTPB3_HUMAN tRNA modification GTPase GTPBP3, mit	0.65921	2	NaN	NaN	NaN	NaN		NaN		NaN		0	#NUM!
H3BM67;H3BUP2;H3BUN4;Q5TZN6;O60936-2;O60936;O60936-3;H3BQJ5	Nucleolar protein 3	NOL3	>tr|H3BM67|H3BM67_HUMAN Nucleolar protein 3 (Fragment) OS=Homo sapiens GN=NOL3 PE=4 SV=2;>tr|H3BUP2|H3BUP2_HUMAN Nucleolar protein 3 (Fragment) OS=Homo sapiens GN=NOL3 PE=4 SV=1;>tr|H3BUN4|H3BUN4_HUMAN Nucleolar protein 3 (Fragment) OS=Homo sapiens GN=NOL3	0.66021	2	NaN	NaN	NaN	NaN		NaN		NaN		0	#NUM!
F8W9L8;A8MW92;E5RK91;E9PM57;A8MW92-2;A8MUE8;A8MXR8;A8MW92-4	PHD finger protein 20-like protein 1	PHF20L1	>tr|F8W9L8|F8W9L8_HUMAN PHD finger protein 20-like protein 1 OS=Homo sapiens GN=PHF20L1 PE=1 SV=1;>sp|A8MW92|P20L1_HUMAN PHD finger protein 20-like protein 1 OS=Homo sapiens GN=PHF20L1 PE=1 SV=2;>tr|E5RK91|E5RK91_HUMAN PHD finger protein 20-like protein 1	0.66175	2	NaN	NaN	NaN	NaN		NaN		NaN		0	#NUM!
Q9NWU5-2;Q9NWU5-3;Q9NWU5;E7ESL0;J3KQY1	39S ribosomal protein L22, mitochondrial	MRPL22	>sp|Q9NWU5-2|RM22_HUMAN Isoform 2 of 39S ribosomal protein L22, mitochondrial OS=Homo sapiens GN=MRPL22;>sp|Q9NWU5-3|RM22_HUMAN Isoform 3 of 39S ribosomal protein L22, mitochondrial OS=Homo sapiens GN=MRPL22;>sp|Q9NWU5|RM22_HUMAN 39S ribosomal protein L22,	0.66204	2	NaN	NaN	NaN	NaN		NaN		NaN		0	#NUM!
Q86WJ6;O60741	Potassium/sodium hyperpolarization-activated cyclic nucleotide-gated channel 1	HCN1	>tr|Q86WJ6|Q86WJ6_HUMAN Hyperpolarization activated cyclic nucleotide-gated potassium channel OS=Homo sapiens GN=HCN1 PE=2 SV=1;>sp|O60741|HCN1_HUMAN Potassium/sodium hyperpolarization-activated cyclic nucleotide-gated channel 1 OS=Homo sapiens GN=HCN1 PE=	0.66354	2	NaN	NaN	NaN	NaN		NaN		NaN		0	#NUM!
B2R9E2;A8K557;Q92481;Q92481-2	Transcription factor AP-2-beta	TFAP2B	>tr|B2R9E2|B2R9E2_HUMAN cDNA, FLJ94350, highly similar to Homo sapiens transcription factor AP-2 beta (activating enhancer binding protein 2 beta) (TFAP2B), mRNA OS=Homo sapiens PE=2 SV=1;>tr|A8K557|A8K557_HUMAN cDNA FLJ78195, highly similar to Homo sapien	0.664	2	NaN	NaN	NaN	NaN		NaN		NaN		0	#NUM!
B4DP53;P32297-3;P32297-1;P32297;D3DW87	Neuronal acetylcholine receptor subunit alpha-3	CHRNA3	>tr|B4DP53|B4DP53_HUMAN cDNA FLJ57492, highly similar to Neuronal acetylcholine receptor protein subunit alpha-3 OS=Homo sapiens PE=2 SV=1;>sp|P32297-3|ACHA3_HUMAN Isoform 3 of Neuronal acetylcholine receptor subunit alpha-3 OS=Homo sapiens GN=CHRNA3;>sp|P	0.66669	2	NaN	NaN	NaN	NaN		NaN		NaN		0	#NUM!
P32456;Q8TCE5	Interferon-induced guanylate-binding protein 2	GBP2	>sp|P32456|GBP2_HUMAN Interferon-induced guanylate-binding protein 2 OS=Homo sapiens GN=GBP2 PE=1 SV=3;>tr|Q8TCE5|Q8TCE5_HUMAN GBP2 protein OS=Homo sapiens GN=GBP2 PE=2 SV=1	0.66809	3	NaN	NaN	NaN	NaN		NaN		NaN		0	#NUM!
Q13129;Q59GL0	Zinc finger protein Rlf	RLF	>sp|Q13129|RLF_HUMAN Zinc finger protein Rlf OS=Homo sapiens GN=RLF PE=1 SV=2;>tr|Q59GL0|Q59GL0_HUMAN Rearranged L-myc fusion sequence variant (Fragment) OS=Homo sapiens PE=2 SV=1	0.67096	2	NaN	NaN	NaN	NaN		NaN		NaN		0	#NUM!
Q32LY2;B3KV85;Q494T1;P61296;Q3T1D5;H0YAH1	Heart- and neural crest derivatives-expressed protein 2	HAND2	>tr|Q32LY2|Q32LY2_HUMAN HAND2 protein (Fragment) OS=Homo sapiens GN=HAND2 PE=2 SV=1;>tr|B3KV85|B3KV85_HUMAN Heart and neural crest derivatives expressed 2, isoform CRA_b OS=Homo sapiens GN=HAND2 PE=2 SV=1;>tr|Q494T1|Q494T1_HUMAN HAND2 protein OS=Homo sapie	0.67674	2	NaN	NaN	NaN	NaN		NaN		NaN		0	#NUM!
O60783;B2R4A5	28S ribosomal protein S14, mitochondrial	MRPS14	>sp|O60783|RT14_HUMAN 28S ribosomal protein S14, mitochondrial OS=Homo sapiens GN=MRPS14 PE=1 SV=1;>tr|B2R4A5|B2R4A5_HUMAN cDNA, FLJ92019, highly similar to Homo sapiens mitochondrial ribosomal protein S14 (MRPS14), nuclear gene encoding mitochondrial prot	0.68347	3	0.84337	NaN	NaN	1.18572		NaN		NaN		0	1.18572
H7C5V3;Q9Y2Q9;Q53G62;E5RFT8	28S ribosomal protein S28, mitochondrial	MRPS28	>tr|H7C5V3|H7C5V3_HUMAN 28S ribosomal protein S28, mitochondrial (Fragment) OS=Homo sapiens GN=MRPS28 PE=1 SV=2;>sp|Q9Y2Q9|RT28_HUMAN 28S ribosomal protein S28, mitochondrial OS=Homo sapiens GN=MRPS28 PE=1 SV=1;>tr|Q53G62|Q53G62_HUMAN Mitochondrial ribosom	0.6862	2	NaN	NaN	NaN	NaN		NaN		NaN		0	#NUM!
B0YJ81;B0YJ81-2;B0YJ83;A6NP58	Very-long-chain (3R)-3-hydroxyacyl-[acyl-carrier protein] dehydratase 1	PTPLA	>sp|B0YJ81|HACD1_HUMAN Very-long-chain (3R)-3-hydroxyacyl-CoA dehydratase 1 OS=Homo sapiens GN=PTPLA PE=1 SV=1;>sp|B0YJ81-2|HACD1_HUMAN Isoform 2 of Very-long-chain (3R)-3-hydroxyacyl-CoA dehydratase 1 OS=Homo sapiens GN=PTPLA;>tr|B0YJ83|B0YJ83_HUMAN Prote	0.68638	2	NaN	NaN	NaN	NaN		NaN		NaN		0	#NUM!
O15382-2;B3KSI3;Q53EW7;O15382;M0QXF9;M0QZP4;M0QZ10;M0R2K7	Branched-chain-amino-acid aminotransferase, mitochondrial;Branched-chain-amino-acid aminotransferase	BCAT2	>sp|O15382-2|BCAT2_HUMAN Isoform B of Branched-chain-amino-acid aminotransferase, mitochondrial OS=Homo sapiens GN=BCAT2;>tr|B3KSI3|B3KSI3_HUMAN Branched-chain-amino-acid aminotransferase OS=Homo sapiens GN=BCAT2 PE=1 SV=1;>tr|Q53EW7|Q53EW7_HUMAN Branched-	0.68777	4	0.79778	1.1644	NaN	1.25348		0.858811		NaN		0	1.05614
P14923;A0A024R1X8;C9JTX4;C9J826;C9JK18;C9JKY1;C9JPI2;K7ERP3	Junction plakoglobin	JUP	>sp|P14923|PLAK_HUMAN Junction plakoglobin OS=Homo sapiens GN=JUP PE=1 SV=3;>tr|A0A024R1X8|A0A024R1X8_HUMAN Junction plakoglobin, isoform CRA_a OS=Homo sapiens GN=JUP PE=4 SV=1;>tr|C9JTX4|C9JTX4_HUMAN Junction plakoglobin (Fragment) OS=Homo sapiens GN=JUP	0.68781	3	NaN	NaN	NaN	NaN		NaN		NaN		0	#NUM!
Q9HAF1-2;Q9HAF1;Q9HAF1-4;Q9HAF1-3	Chromatin modification-related protein MEAF6	MEAF6	>sp|Q9HAF1-2|EAF6_HUMAN Isoform 2 of Chromatin modification-related protein MEAF6 OS=Homo sapiens GN=MEAF6;>sp|Q9HAF1|EAF6_HUMAN Chromatin modification-related protein MEAF6 OS=Homo sapiens GN=MEAF6 PE=1 SV=1;>sp|Q9HAF1-4|EAF6_HUMAN Isoform 4 of Chromatin	0.68802	2	NaN	NaN	NaN	NaN		NaN		NaN		0	#NUM!
Q9HAW4-2;E7ESG2;Q9HAW4-3;Q9HAW4;Q1RMC5	Claspin	CLSPN	>sp|Q9HAW4-2|CLSPN_HUMAN Isoform 2 of Claspin OS=Homo sapiens GN=CLSPN;>tr|E7ESG2|E7ESG2_HUMAN Claspin OS=Homo sapiens GN=CLSPN PE=1 SV=1;>sp|Q9HAW4-3|CLSPN_HUMAN Isoform 3 of Claspin OS=Homo sapiens GN=CLSPN;>sp|Q9HAW4|CLSPN_HUMAN Claspin OS=Homo sapiens	0.68803	2	NaN	NaN	NaN	NaN		NaN		NaN		0	#NUM!
Q5TGY3	AT-hook DNA-binding motif-containing protein 1	AHDC1	>sp|Q5TGY3|AHDC1_HUMAN AT-hook DNA-binding motif-containing protein 1 OS=Homo sapiens GN=AHDC1 PE=1 SV=1	0.68805	3	NaN	NaN	NaN	NaN		NaN		NaN		0	#NUM!
Q8IY18;B4E265	Structural maintenance of chromosomes protein 5	SMC5	>sp|Q8IY18|SMC5_HUMAN Structural maintenance of chromosomes protein 5 OS=Homo sapiens GN=SMC5 PE=1 SV=2;>tr|B4E265|B4E265_HUMAN cDNA FLJ61059, highly similar to Homo sapiens SMC5 structural maintenance of chromosomes 5-like 1 (SMC5L1), mRNA OS=Homo sapiens	0.68902	4	NaN	0.77672	NaN	NaN		1.28747		NaN		0	1.28747
Q9H9P8-2;C9JVN9;Q9H9P8;A8K9B2	L-2-hydroxyglutarate dehydrogenase, mitochondrial	L2HGDH	>sp|Q9H9P8-2|L2HDH_HUMAN Isoform 2 of L-2-hydroxyglutarate dehydrogenase, mitochondrial OS=Homo sapiens GN=L2HGDH;>tr|C9JVN9|C9JVN9_HUMAN L-2-hydroxyglutarate dehydrogenase, mitochondrial OS=Homo sapiens GN=L2HGDH PE=1 SV=1;>sp|Q9H9P8|L2HDH_HUMAN L-2-hydro	0.69727	2	NaN	NaN	NaN	NaN		NaN		NaN		0	#NUM!
B4DH37;O15400-2;O15400	Syntaxin-7	STX7	>tr|B4DH37|B4DH37_HUMAN cDNA FLJ53760, highly similar to Syntaxin-7 OS=Homo sapiens PE=2 SV=1;>sp|O15400-2|STX7_HUMAN Isoform 2 of Syntaxin-7 OS=Homo sapiens GN=STX7;>sp|O15400|STX7_HUMAN Syntaxin-7 OS=Homo sapiens GN=STX7 PE=1 SV=4	0.70073	2	NaN	NaN	NaN	NaN		NaN		NaN		0	#NUM!
M0QZF4;B4DUV2;B4DUW2;B3KVX8;B4DLI0;M0R2P6;Q8TBC3;B2R6W9;M0R204;M0R0S2;H0Y5P8;M0QYB1;M0R0E3;B3KP80;B7ZAF7;B4DJX2;M0R0S1;Q9Y597-2;Q9Y597	SH3KBP1-binding protein 1	SHKBP1	>tr|M0QZF4|M0QZF4_HUMAN SH3KBP1-binding protein 1 (Fragment) OS=Homo sapiens GN=SHKBP1 PE=1 SV=1;>tr|B4DUV2|B4DUV2_HUMAN cDNA FLJ55912, highly similar to Homo sapiens SH3KBP1 binding protein 1 (SHKBP1), mRNA OS=Homo sapiens PE=2 SV=1;>tr|B4DUW2|B4DUW2_HUMA	0.70078	2	NaN	NaN	NaN	NaN		NaN		NaN		0	#NUM!
E7ESJ6;Q9H368;O15379;O15379-2	Histone deacetylase 3	HDAC3	>tr|E7ESJ6|E7ESJ6_HUMAN Histone deacetylase 3 (Fragment) OS=Homo sapiens GN=HDAC3 PE=4 SV=2;>tr|Q9H368|Q9H368_HUMAN PRO1670 OS=Homo sapiens PE=2 SV=1;>sp|O15379|HDAC3_HUMAN Histone deacetylase 3 OS=Homo sapiens GN=HDAC3 PE=1 SV=2;>sp|O15379-2|HDAC3_HUMAN I	0.70388	2	NaN	NaN	NaN	NaN		NaN		NaN		0	#NUM!
E5RIA1;E5RHA6;Q86UL3;Q2TU73	Glycerol-3-phosphate acyltransferase 4	AGPAT6	>tr|E5RIA1|E5RIA1_HUMAN Glycerol-3-phosphate acyltransferase 4 (Fragment) OS=Homo sapiens GN=AGPAT6 PE=4 SV=1;>tr|E5RHA6|E5RHA6_HUMAN Glycerol-3-phosphate acyltransferase 4 OS=Homo sapiens GN=AGPAT6 PE=4 SV=1;>sp|Q86UL3|GPAT4_HUMAN Glycerol-3-phosphate acy	0.70502	3	NaN	NaN	NaN	NaN		NaN		NaN		0	#NUM!
P78539-4;P78539-3;P78539-5;P78539-2;V9HW11;P78539	Sushi repeat-containing protein SRPX	SRPX	>sp|P78539-4|SRPX_HUMAN Isoform 4 of Sushi repeat-containing protein SRPX OS=Homo sapiens GN=SRPX;>sp|P78539-3|SRPX_HUMAN Isoform 3 of Sushi repeat-containing protein SRPX OS=Homo sapiens GN=SRPX;>sp|P78539-5|SRPX_HUMAN Isoform 5 of Sushi repeat-containing	0.70527	2	NaN	NaN	NaN	NaN		NaN		NaN		0	#NUM!
Q59F73;P25098;P35626;A8K869;A0A024R1D8	Beta-adrenergic receptor kinase 1;Beta-adrenergic receptor kinase 2	ADRBK1;ADRBK2	>tr|Q59F73|Q59F73_HUMAN Beta adrenergic receptor kinase 1 variant (Fragment) OS=Homo sapiens PE=2 SV=1;>sp|P25098|ARBK1_HUMAN Beta-adrenergic receptor kinase 1 OS=Homo sapiens GN=ADRBK1 PE=1 SV=2;>sp|P35626|ARBK2_HUMAN Beta-adrenergic receptor kinase 2 OS=	0.70566	3	NaN	NaN	0.82067	NaN		NaN		1.21852		0	1.21852
G3V4Z4;Q02252-2;Q53H94;Q53FN8;Q02252;A0A024R6G4	Methylmalonate-semialdehyde dehydrogenase [acylating], mitochondrial	ALDH6A1	>tr|G3V4Z4|G3V4Z4_HUMAN Methylmalonate-semialdehyde dehydrogenase [acylating], mitochondrial OS=Homo sapiens GN=ALDH6A1 PE=1 SV=1;>sp|Q02252-2|MMSA_HUMAN Isoform 2 of Methylmalonate-semialdehyde dehydrogenase [acylating], mitochondrial OS=Homo sapiens GN=A	0.70634	2	NaN	NaN	NaN	NaN		NaN		NaN		0	#NUM!
Q02127;J3QRJ4;J3QRQ3;I3L449;I3NI32	Dihydroorotate dehydrogenase (quinone), mitochondrial	DHODH	>sp|Q02127|PYRD_HUMAN Dihydroorotate dehydrogenase (quinone), mitochondrial OS=Homo sapiens GN=DHODH PE=1 SV=3;>tr|J3QRJ4|J3QRJ4_HUMAN Dihydroorotate dehydrogenase (quinone), mitochondrial (Fragment) OS=Homo sapiens GN=DHODH PE=4 SV=1;>tr|J3QRQ3|J3QRQ3_HUM	0.70806	3	NaN	NaN	0.8352	NaN		NaN		1.19732		0	1.19732
Q16626	Male-enhanced antigen 1	MEA1	>sp|Q16626|MEA1_HUMAN Male-enhanced antigen 1 OS=Homo sapiens GN=MEA1 PE=1 SV=2	0.70913	2	NaN	NaN	NaN	NaN		NaN		NaN		0	#NUM!
Q6IN84	rRNA methyltransferase 1, mitochondrial	MRM1	>sp|Q6IN84|MRM1_HUMAN rRNA methyltransferase 1, mitochondrial OS=Homo sapiens GN=MRM1 PE=1 SV=1	0.71041	2	NaN	NaN	NaN	NaN		NaN		NaN		0	#NUM!
Q59F04;P09619;A8KAM8;I6MBV4	Platelet-derived growth factor receptor beta;Tyrosine-protein kinase receptor	PDGFRB	>tr|Q59F04|Q59F04_HUMAN Platelet-derived growth factor receptor beta variant (Fragment) OS=Homo sapiens PE=2 SV=1;>sp|P09619|PGFRB_HUMAN Platelet-derived growth factor receptor beta OS=Homo sapiens GN=PDGFRB PE=1 SV=1;>tr|A8KAM8|A8KAM8_HUMAN Tyrosine-prote	0.71285	3	NaN	NaN	NaN	NaN		NaN		NaN		0	#NUM!
Q86V15-2;B3KRV8;Q86V15;B7Z1S3	Zinc finger protein castor homolog 1	CASZ1	>sp|Q86V15-2|CASZ1_HUMAN Isoform 2 of Zinc finger protein castor homolog 1 OS=Homo sapiens GN=CASZ1;>tr|B3KRV8|B3KRV8_HUMAN cDNA FLJ34970 fis, clone NTONG2005363, highly similar to Castor homolog 1 zinc finger protein OS=Homo sapiens PE=2 SV=1;>sp|Q86V15|C	0.71831	2	NaN	NaN	NaN	NaN		NaN		NaN		0	#NUM!
R4GMM6;R4GN77;R4GNG6;R4GND1;R4GN80;Q969T4	Ubiquitin-conjugating enzyme E2 E3	UBE2E3	>tr|R4GMM6|R4GMM6_HUMAN Ubiquitin-conjugating enzyme E2 E3 OS=Homo sapiens GN=UBE2E3 PE=1 SV=1;>tr|R4GN77|R4GN77_HUMAN Ubiquitin-conjugating enzyme E2 E3 (Fragment) OS=Homo sapiens GN=UBE2E3 PE=1 SV=1;>tr|R4GNG6|R4GNG6_HUMAN Ubiquitin-conjugating enzyme E2	0.71871	3	0.94894	NaN	0.7807	1.05381		NaN		1.2809		0	1.16735
Q96JB3-2;Q96JB3	Hypermethylated in cancer 2 protein	HIC2	>sp|Q96JB3-2|HIC2_HUMAN Isoform 2 of Hypermethylated in cancer 2 protein OS=Homo sapiens GN=HIC2;>sp|Q96JB3|HIC2_HUMAN Hypermethylated in cancer 2 protein OS=Homo sapiens GN=HIC2 PE=1 SV=2	0.71902	2	NaN	NaN	NaN	NaN		NaN		NaN		0	#NUM!
O75525-2;O75525;E5RG12;H0YAQ1;H0YAQ3;E5RJZ9	KH domain-containing, RNA-binding, signal transduction-associated protein 3	KHDRBS3	>sp|O75525-2|KHDR3_HUMAN Isoform 2 of KH domain-containing, RNA-binding, signal transduction-associated protein 3 OS=Homo sapiens GN=KHDRBS3;>sp|O75525|KHDR3_HUMAN KH domain-containing, RNA-binding, signal transduction-associated protein 3 OS=Homo sapiens	0.71945	3	NaN	NaN	NaN	NaN		NaN		NaN		0	#NUM!
Q8IU81;B2RCD8	Interferon regulatory factor 2-binding protein 1	IRF2BP1	>sp|Q8IU81|I2BP1_HUMAN Interferon regulatory factor 2-binding protein 1 OS=Homo sapiens GN=IRF2BP1 PE=1 SV=1;>tr|B2RCD8|B2RCD8_HUMAN cDNA, FLJ96012, highly similar to Homo sapiens interferon regulatory factor 2 binding protein 1 (IRF2BP1), mRNA OS=Homo sap	0.71967	2	NaN	NaN	NaN	NaN		NaN		NaN		0	#NUM!
Q96EU6-2;Q96EU6;B2R9K5	Ribosomal RNA processing protein 36 homolog	RRP36	>sp|Q96EU6-2|RRP36_HUMAN Isoform 2 of Ribosomal RNA processing protein 36 homolog OS=Homo sapiens GN=RRP36;>sp|Q96EU6|RRP36_HUMAN Ribosomal RNA processing protein 36 homolog OS=Homo sapiens GN=RRP36 PE=1 SV=1;>tr|B2R9K5|B2R9K5_HUMAN cDNA, FLJ94435 OS=Homo	0.72041	3	NaN	NaN	NaN	NaN		NaN		NaN		0	#NUM!
Q9BYX7	Putative beta-actin-like protein 3	POTEKP	>sp|Q9BYX7|ACTBM_HUMAN Putative beta-actin-like protein 3 OS=Homo sapiens GN=POTEKP PE=5 SV=1	0.72129	3	NaN	NaN	NaN	NaN		NaN		NaN		0	#NUM!
B4DSI5;B4DGQ2;P28715;R4GMW8;Q59FZ7;B4E0X0	DNA repair protein complementing XP-G cells	ERCC5;BIVM-ERCC5	>tr|B4DSI5|B4DSI5_HUMAN cDNA FLJ61372, highly similar to DNA-repair protein complementing XP-G cells OS=Homo sapiens PE=2 SV=1;>tr|B4DGQ2|B4DGQ2_HUMAN cDNA FLJ51835, highly similar to DNA-repair protein complementing XP-G cells OS=Homo sapiens PE=2 SV=1;>s	0.72207	2	NaN	NaN	NaN	NaN		NaN		NaN		0	#NUM!
O94880;B4DG57;O94880-2	PHD finger protein 14	PHF14	>sp|O94880|PHF14_HUMAN PHD finger protein 14 OS=Homo sapiens GN=PHF14 PE=1 SV=2;>tr|B4DG57|B4DG57_HUMAN cDNA FLJ61230, highly similar to PHD finger protein 14 OS=Homo sapiens PE=2 SV=1;>sp|O94880-2|PHF14_HUMAN Isoform 2 of PHD finger protein 14 OS=Homo sap	0.7233	4	0.77902	NaN	NaN	1.28366		NaN		NaN		0	1.28366
Q9HB96	Fanconi anemia group E protein	FANCE	>sp|Q9HB96|FANCE_HUMAN Fanconi anemia group E protein OS=Homo sapiens GN=FANCE PE=1 SV=1	0.72347	2	NaN	NaN	NaN	NaN		NaN		NaN		0	#NUM!
P48059;P48059-4;B3KNZ3;P48059-2;P48059-5;P48059-3	LIM and senescent cell antigen-like-containing domain protein 1	LIMS1	>sp|P48059|LIMS1_HUMAN LIM and senescent cell antigen-like-containing domain protein 1 OS=Homo sapiens GN=LIMS1 PE=1 SV=4;>sp|P48059-4|LIMS1_HUMAN Isoform 4 of LIM and senescent cell antigen-like-containing domain protein 1 OS=Homo sapiens GN=LIMS1;>tr|B3K	0.72468	3	NaN	NaN	NaN	NaN		NaN		NaN		0	#NUM!
B4DH46;E9PCY4;P61962	DDB1- and CUL4-associated factor 7	DCAF7	>tr|B4DH46|B4DH46_HUMAN cDNA FLJ60519, highly similar to WD repeat protein 68 OS=Homo sapiens PE=2 SV=1;>tr|E9PCY4|E9PCY4_HUMAN DDB1- and CUL4-associated factor 7 OS=Homo sapiens GN=DCAF7 PE=1 SV=1;>sp|P61962|DCAF7_HUMAN DDB1- and CUL4-associated factor 7	0.72522	4	0.77604	NaN	NaN	1.28859		NaN		NaN		0	1.28859
H0YFI1;F5H479;F5GX19;F5H3Y3;Q6IAA8	Ragulator complex protein LAMTOR1	LAMTOR1	>tr|H0YFI1|H0YFI1_HUMAN Ragulator complex protein LAMTOR1 (Fragment) OS=Homo sapiens GN=LAMTOR1 PE=1 SV=1;>tr|F5H479|F5H479_HUMAN Ragulator complex protein LAMTOR1 OS=Homo sapiens GN=LAMTOR1 PE=1 SV=1;>tr|F5GX19|F5GX19_HUMAN Ragulator complex protein LAMTO	0.72672	4	NaN	NaN	0.9283	NaN		NaN		1.07724		0	1.07724
Q5JTZ9	Alanine--tRNA ligase, mitochondrial	AARS2	>sp|Q5JTZ9|SYAM_HUMAN Alanine--tRNA ligase, mitochondrial OS=Homo sapiens GN=AARS2 PE=1 SV=1	0.72951	4	0.80013	NaN	NaN	1.2498		NaN		NaN		0	1.2498
Q9GZT9-2;R4SCQ0;R4SCP5;R4SCF3;R4SCC4;R4S1C5;R4RZ18;R4RYZ7;R4RYY7;Q9GZT9;Q9GZT9-3	Egl nine homolog 1	EGLN1	>sp|Q9GZT9-2|EGLN1_HUMAN Isoform 2 of Egl nine homolog 1 OS=Homo sapiens GN=EGLN1;>tr|R4SCQ0|R4SCQ0_HUMAN Egl nine homolog 1 (C. elegans) OS=Homo sapiens GN=EGLN1 PE=4 SV=1;>tr|R4SCP5|R4SCP5_HUMAN Hypoxia-inducible factor prolyl hydroxylase 2 OS=Homo sapie	0.73025	3	0.79054	NaN	NaN	1.26496		NaN		NaN		0	1.26496
Q10589-2;Q10589;A0A024R7H5;B4E0Z6	Bone marrow stromal antigen 2	BST2	>sp|Q10589-2|BST2_HUMAN Isoform 2 of Bone marrow stromal antigen 2 OS=Homo sapiens GN=BST2;>sp|Q10589|BST2_HUMAN Bone marrow stromal antigen 2 OS=Homo sapiens GN=BST2 PE=1 SV=1;>tr|A0A024R7H5|A0A024R7H5_HUMAN Bone marrow stromal cell antigen 2, isoform CRA	0.73201	2	NaN	NaN	NaN	NaN		NaN		NaN		0	#NUM!
E7EQL8;A7E2V7;Q96RT7-2;Q96RT7-3;B2RWN4;Q96RT7	Gamma-tubulin complex component 6	TUBGCP6	>tr|E7EQL8|E7EQL8_HUMAN Gamma-tubulin complex component 6 OS=Homo sapiens GN=TUBGCP6 PE=1 SV=1;>tr|A7E2V7|A7E2V7_HUMAN TUBGCP6 protein OS=Homo sapiens GN=TUBGCP6 PE=2 SV=1;>sp|Q96RT7-2|GCP6_HUMAN Isoform 2 of Gamma-tubulin complex component 6 OS=Homo sapie	0.73206	3	NaN	NaN	NaN	NaN		NaN		NaN		0	#NUM!
B9A012;Q13402-3;Q13402-4;Q13402-5;Q13402-8;Q13402-2;Q13402-7;Q13402-6;Q13402	Unconventional myosin-VIIa	MYO7A	>tr|B9A012|B9A012_HUMAN Myosin VIIA, isoform CRA_a OS=Homo sapiens GN=MYO7A PE=4 SV=1;>sp|Q13402-3|MYO7A_HUMAN Isoform 3 of Unconventional myosin-VIIa OS=Homo sapiens GN=MYO7A;>sp|Q13402-4|MYO7A_HUMAN Isoform 4 of Unconventional myosin-VIIa OS=Homo sapiens	0.73255	2	NaN	NaN	NaN	NaN		NaN		NaN		0	#NUM!
B4DY78;J3KQF4;E7ENJ7;B4E1H3;Q2TAA8;B4DXD0	Translin-associated factor X-interacting protein 1	TSNAXIP1	>tr|B4DY78|B4DY78_HUMAN cDNA FLJ59827, highly similar to Homo sapiens translin-associated factor X interacting protein 1 (TSNAXIP1), mRNA OS=Homo sapiens PE=2 SV=1;>tr|J3KQF4|J3KQF4_HUMAN Translin-associated factor X-interacting protein 1 (Fragment) OS=Hom	0.73423	2	NaN	NaN	NaN	NaN		NaN		NaN		0	#NUM!
Q13387-4;C9JXW5;A8MTJ1;Q13387-3;Q13387-2;J3KNN6;Q86VW5;Q13387	C-Jun-amino-terminal kinase-interacting protein 2	MAPK8IP2	>sp|Q13387-4|JIP2_HUMAN Isoform 4 of C-Jun-amino-terminal kinase-interacting protein 2 OS=Homo sapiens GN=MAPK8IP2;>tr|C9JXW5|C9JXW5_HUMAN C-Jun-amino-terminal kinase-interacting protein 2 OS=Homo sapiens GN=MAPK8IP2 PE=4 SV=1;>tr|A8MTJ1|A8MTJ1_HUMAN C-Jun	0.73511	3	NaN	NaN	NaN	NaN		NaN		NaN		0	#NUM!
K7ELY9;E7EV84;B4DQ36;W0FFG4;B4DS82;Q53F78;Q14457;A0A024R1X5	Beclin-1	BECN1	>tr|K7ELY9|K7ELY9_HUMAN Beclin-1 (Fragment) OS=Homo sapiens GN=BECN1 PE=4 SV=1;>tr|E7EV84|E7EV84_HUMAN Beclin-1 OS=Homo sapiens GN=BECN1 PE=1 SV=1;>tr|B4DQ36|B4DQ36_HUMAN cDNA FLJ52719, moderately similar to Beclin-1 OS=Homo sapiens PE=2 SV=1;>tr|W0FFG4|W0	0.73533	2	NaN	NaN	NaN	NaN		NaN		NaN		0	#NUM!
Q567V2-2;Q567V2;A0A024R7K6	Mpv17-like protein 2	MPV17L2	>sp|Q567V2-2|M17L2_HUMAN Isoform 2 of Mpv17-like protein 2 OS=Homo sapiens GN=MPV17L2;>sp|Q567V2|M17L2_HUMAN Mpv17-like protein 2 OS=Homo sapiens GN=MPV17L2 PE=1 SV=2;>tr|A0A024R7K6|A0A024R7K6_HUMAN Uncharacterized protein OS=Homo sapiens GN=FKSG24 PE=4 SV	0.73659	2	NaN	NaN	NaN	NaN		NaN		NaN		0	#NUM!
Q9H0E9-3;F8W820;B4DEG9;H7C128;H7C179;B4DN43;Q9H0E9-4;B5MCW3;H7C127;B2R5V7;Q9H0E9-2;A8K1N6;Q9H0E9;H7C2P4;H0YAH7;B4DMS9;B4DSD6	Bromodomain-containing protein 8	BRD8	>sp|Q9H0E9-3|BRD8_HUMAN Isoform 3 of Bromodomain-containing protein 8 OS=Homo sapiens GN=BRD8;>tr|F8W820|F8W820_HUMAN Bromodomain-containing protein 8 OS=Homo sapiens GN=BRD8 PE=1 SV=1;>tr|B4DEG9|B4DEG9_HUMAN cDNA FLJ58448, highly similar to Bromodomain-co	0.73715	3	NaN	NaN	NaN	NaN		NaN		NaN		0	#NUM!
Q8N4Q1;A0A024R2I5;Q8N4Q1-2;A0A024R2F8	Mitochondrial intermembrane space import and assembly protein 40	CHCHD4	>sp|Q8N4Q1|MIA40_HUMAN Mitochondrial intermembrane space import and assembly protein 40 OS=Homo sapiens GN=CHCHD4 PE=1 SV=1;>tr|A0A024R2I5|A0A024R2I5_HUMAN Coiled-coil-helix-coiled-coil-helix domain containing 4, isoform CRA_a OS=Homo sapiens GN=CHCHD4 PE=	0.73745	2	NaN	NaN	NaN	NaN		NaN		NaN		0	#NUM!
Q8IXP7;Q66K25;M0QZ22;Q5PRF9;A0A024R0N7	Protein Smaug homolog 2	SAMD4B	>tr|Q8IXP7|Q8IXP7_HUMAN SAMD4B protein (Fragment) OS=Homo sapiens GN=SAMD4B PE=2 SV=1;>tr|Q66K25|Q66K25_HUMAN SAMD4B protein OS=Homo sapiens GN=SAMD4B PE=2 SV=1;>tr|M0QZ22|M0QZ22_HUMAN Protein Smaug homolog 2 OS=Homo sapiens GN=SAMD4B PE=1 SV=1;>sp|Q5PRF9|	0.74018	2	NaN	NaN	NaN	NaN		NaN		NaN		0	#NUM!
E9PDC4;B7Z4T5;Q53RD5;B3KUX4;F5GYS8;B7Z4B3;H0YNY8;U3KPR8;O00470;B2RC57;O00470-2;F8W8U3	Homeobox protein Meis1	MEIS1	>tr|E9PDC4|E9PDC4_HUMAN Homeobox protein Meis1 (Fragment) OS=Homo sapiens GN=MEIS1 PE=1 SV=2;>tr|B7Z4T5|B7Z4T5_HUMAN Homeobox protein Meis1 OS=Homo sapiens GN=MEIS1 PE=1 SV=1;>tr|Q53RD5|Q53RD5_HUMAN Putative uncharacterized protein MEIS1 (Fragment) OS=Homo	0.74146	2	NaN	NaN	NaN	NaN		NaN		NaN		0	#NUM!
M0QYC5;O75182-2;O75182;B7Z392	Paired amphipathic helix protein Sin3b	SIN3B	>tr|M0QYC5|M0QYC5_HUMAN Paired amphipathic helix protein Sin3b OS=Homo sapiens GN=SIN3B PE=1 SV=1;>sp|O75182-2|SIN3B_HUMAN Isoform 2 of Paired amphipathic helix protein Sin3b OS=Homo sapiens GN=SIN3B;>sp|O75182|SIN3B_HUMAN Paired amphipathic helix protein	0.74329	2	NaN	NaN	NaN	NaN		NaN		NaN		0	#NUM!
H3BVD1;P84022-3;P84022-2;Q59F45;P84022;A0A024R5Z3;O15198-2;A0A024RDR3;B7Z5N5;Q15796-2;Q53XR6;Q15796;O15198;H0YMP2;H0YL71;H3BP09;K7EJX0	Mothers against decapentaplegic homolog 3;Mothers against decapentaplegic homolog 9;Mothers against decapentaplegic homolog 2	SMAD3;SMAD9;SMAD2	>tr|H3BVD1|H3BVD1_HUMAN Mothers against decapentaplegic homolog 3 (Fragment) OS=Homo sapiens GN=SMAD3 PE=4 SV=1;>sp|P84022-3|SMAD3_HUMAN Isoform 3 of Mothers against decapentaplegic homolog 3 OS=Homo sapiens GN=SMAD3;>sp|P84022-2|SMAD3_HUMAN Isoform 2 of M	0.74456	3	NaN	NaN	NaN	NaN		NaN		NaN		0	#NUM!
Q9NZC9;H7BYI2;C9JS37;C9JP32;C9J8F8;C9J6I8;H7C1I3;H7C051	SWI/SNF-related matrix-associated actin-dependent regulator of chromatin subfamily A-like protein 1	SMARCAL1	>sp|Q9NZC9|SMAL1_HUMAN SWI/SNF-related matrix-associated actin-dependent regulator of chromatin subfamily A-like protein 1 OS=Homo sapiens GN=SMARCAL1 PE=1 SV=1;>tr|H7BYI2|H7BYI2_HUMAN SWI/SNF-related matrix-associated actin-dependent regulator of chromati	0.74472	3	NaN	NaN	0.94291	NaN		NaN		1.06055		0	1.06055
B7Z3K1;D3DVS1		TMEM128	>tr|B7Z3K1|B7Z3K1_HUMAN Transmembrane protein 128 OS=Homo sapiens GN=TMEM128 PE=2 SV=1;>tr|D3DVS1|D3DVS1_HUMAN Transmembrane protein 128 OS=Homo sapiens GN=TMEM128 PE=4 SV=1	0.74564	3	NaN	NaN	NaN	NaN		NaN		NaN		0	#NUM!
H0Y362;Q8NEW0	Zinc transporter 7	SLC30A7	>tr|H0Y362|H0Y362_HUMAN Zinc transporter 7 (Fragment) OS=Homo sapiens GN=SLC30A7 PE=4 SV=2;>sp|Q8NEW0|ZNT7_HUMAN Zinc transporter 7 OS=Homo sapiens GN=SLC30A7 PE=2 SV=1	0.74645	4	0.76028	NaN	NaN	1.3153		NaN		NaN		0	1.3153
O94806-2;B3KNJ2;O94806	Serine/threonine-protein kinase D3	PRKD3	>sp|O94806-2|KPCD3_HUMAN Isoform 2 of Serine/threonine-protein kinase D3 OS=Homo sapiens GN=PRKD3;>tr|B3KNJ2|B3KNJ2_HUMAN cDNA FLJ14679 fis, clone NT2RP2004232, highly similar to Serine/threonine-protein kinase D3 (EC 2.7.11.13) OS=Homo sapiens PE=2 SV=1;>	0.74975	3	NaN	NaN	NaN	NaN		NaN		NaN		0	#NUM!
Q14061;C9J8T6	Cytochrome c oxidase copper chaperone	COX17	>sp|Q14061|COX17_HUMAN Cytochrome c oxidase copper chaperone OS=Homo sapiens GN=COX17 PE=1 SV=2;>tr|C9J8T6|C9J8T6_HUMAN Cytochrome c oxidase copper chaperone OS=Homo sapiens GN=COX17 PE=1 SV=1	0.75059	2	NaN	NaN	NaN	NaN		NaN		NaN		0	#NUM!
K7EPS2;K7EKB9;K7ERZ7;Q6PJU3;P15923	Transcription factor E2-alpha	TCF3	>tr|K7EPS2|K7EPS2_HUMAN Transcription factor E2-alpha (Fragment) OS=Homo sapiens GN=TCF3 PE=4 SV=1;>tr|K7EKB9|K7EKB9_HUMAN Transcription factor E2-alpha (Fragment) OS=Homo sapiens GN=TCF3 PE=4 SV=1;>tr|K7ERZ7|K7ERZ7_HUMAN Transcription factor E2-alpha (Fra	0.7512	2	NaN	NaN	NaN	NaN		NaN		NaN		0	#NUM!
K7EP32;Q9BZV1-2;Q9BZV1;K7ELN1	UBX domain-containing protein 6	UBXN6	>tr|K7EP32|K7EP32_HUMAN UBX domain-containing protein 6 (Fragment) OS=Homo sapiens GN=UBXN6 PE=1 SV=1;>sp|Q9BZV1-2|UBXN6_HUMAN Isoform 2 of UBX domain-containing protein 6 OS=Homo sapiens GN=UBXN6;>sp|Q9BZV1|UBXN6_HUMAN UBX domain-containing protein 6 OS=H	0.75199	3	0.75199	NaN	NaN	1.3298		NaN		NaN		0	1.3298
Q05BS8;B4DZM2;Q99590-2;B2RA91;F8VXG7;Q99590	Protein SCAF11	SFRS2IP;SCAF11	>tr|Q05BS8|Q05BS8_HUMAN SFRS2IP protein (Fragment) OS=Homo sapiens GN=SFRS2IP PE=2 SV=1;>tr|B4DZM2|B4DZM2_HUMAN cDNA FLJ53255, highly similar to SFRS2-interacting protein (Fragment) OS=Homo sapiens PE=2 SV=1;>sp|Q99590-2|SCAFB_HUMAN Isoform 2 of Protein SC	0.75393	3	NaN	NaN	NaN	NaN		NaN		NaN		0	#NUM!
H3BTK3;I3L3X8;H3BSW7;H3BUY4;H3BPY5;H3BNU9;Q9Y2V2	Calcium-regulated heat stable protein 1	CARHSP1	>tr|H3BTK3|H3BTK3_HUMAN Calcium-regulated heat stable protein 1 (Fragment) OS=Homo sapiens GN=CARHSP1 PE=1 SV=1;>tr|I3L3X8|I3L3X8_HUMAN Calcium-regulated heat stable protein 1 OS=Homo sapiens GN=CARHSP1 PE=1 SV=1;>tr|H3BSW7|H3BSW7_HUMAN Calcium-regulated h	0.75551	4	NaN	0.80464	0.91131	NaN		1.24279		1.09732		0	1.17006
H0YHD0;B3KU43;Q5PSV4-2;B4DLQ5;Q5PSV4	Breast cancer metastasis-suppressor 1-like protein	BRMS1L	>tr|H0YHD0|H0YHD0_HUMAN Breast cancer metastasis-suppressor 1-like protein (Fragment) OS=Homo sapiens GN=BRMS1L PE=4 SV=1;>tr|B3KU43|B3KU43_HUMAN cDNA FLJ39177 fis, clone OCBBF2003925, highly similar to Homo sapiens breast cancer metastasis-suppressor 1-li	0.75555	4	NaN	NaN	0.76662	NaN		NaN		1.30443		0	1.30443
B3KSI5;Q96FF9;A0A024R5D6;B5MBX0	Sororin	CDCA5	>tr|B3KSI5|B3KSI5_HUMAN cDNA FLJ36351 fis, clone THYMU2007146, highly similar to Sororin (Cell division cycle-associated protein 5) OS=Homo sapiens PE=2 SV=1;>sp|Q96FF9|CDCA5_HUMAN Sororin OS=Homo sapiens GN=CDCA5 PE=1 SV=1;>tr|A0A024R5D6|A0A024R5D6_HUMAN	0.75559	3	NaN	NaN	NaN	NaN		NaN		NaN		0	#NUM!
O00560-2;G5EA09	Syntenin-1	SDCBP	>sp|O00560-2|SDCB1_HUMAN Isoform 2 of Syntenin-1 OS=Homo sapiens GN=SDCBP;>tr|G5EA09|G5EA09_HUMAN Syndecan binding protein (Syntenin), isoform CRA_a OS=Homo sapiens GN=SDCBP PE=1 SV=1	0.75654	2	NaN	NaN	NaN	NaN		NaN		NaN		0	#NUM!
P49356;Q86TX8;B3KSC2;B4DJ86;P49356-2;B4DL54;H0YHI0	Protein farnesyltransferase subunit beta	FNTB;CHURC1-FNTB	>sp|P49356|FNTB_HUMAN Protein farnesyltransferase subunit beta OS=Homo sapiens GN=FNTB PE=1 SV=1;>tr|Q86TX8|Q86TX8_HUMAN Full-length cDNA clone CS0DC015YK16 of Neuroblastoma of Homo sapiens (human) (Fragment) OS=Homo sapiens PE=2 SV=1;>tr|B3KSC2|B3KSC2_HUM	0.75789	2	NaN	NaN	NaN	NaN		NaN		NaN		0	#NUM!
C9JB30;Q9UPY8-2;Q9UPY8;B2R5W6	Microtubule-associated protein RP/EB family member 3	MAPRE3	>tr|C9JB30|C9JB30_HUMAN Microtubule-associated protein RP/EB family member 3 (Fragment) OS=Homo sapiens GN=MAPRE3 PE=1 SV=1;>sp|Q9UPY8-2|MARE3_HUMAN Isoform 2 of Microtubule-associated protein RP/EB family member 3 OS=Homo sapiens GN=MAPRE3;>sp|Q9UPY8|MARE	0.75875	3	NaN	NaN	NaN	NaN		NaN		NaN		0	#NUM!
Q16533;B2RC42	snRNA-activating protein complex subunit 1	SNAPC1	>sp|Q16533|SNPC1_HUMAN snRNA-activating protein complex subunit 1 OS=Homo sapiens GN=SNAPC1 PE=1 SV=1;>tr|B2RC42|B2RC42_HUMAN cDNA, FLJ95843, highly similar to Homo sapiens small nuclear RNA activating complex, polypeptide 1, 43kDa (SNAPC1), mRNA OS=Homo s	0.75985	5	0.75985	NaN	NaN	1.31605		NaN		NaN		0	1.31605
F8WBT4;C9J9T0;Q96AT9-4;Q96AT9-2;E7EW52;C9IZU8;Q96AT9	Ribulose-phosphate 3-epimerase	RPE	>tr|F8WBT4|F8WBT4_HUMAN Ribulose-phosphate 3-epimerase OS=Homo sapiens GN=RPE PE=1 SV=1;>tr|C9J9T0|C9J9T0_HUMAN Ribulose-5-phosphate-3-epimerase, isoform CRA_a OS=Homo sapiens GN=RPE PE=1 SV=1;>sp|Q96AT9-4|RPE_HUMAN Isoform 4 of Ribulose-phosphate 3-epimer	0.76228	3	NaN	NaN	NaN	NaN		NaN		NaN		0	#NUM!
H0Y6J0;O00746;Q4TT34;F2Z2X0;O00746-2	Nucleoside diphosphate kinase, mitochondrial;Nucleoside diphosphate kinase	NME4	>tr|H0Y6J0|H0Y6J0_HUMAN Nucleoside diphosphate kinase, mitochondrial (Fragment) OS=Homo sapiens GN=NME4 PE=3 SV=1;>sp|O00746|NDKM_HUMAN Nucleoside diphosphate kinase, mitochondrial OS=Homo sapiens GN=NME4 PE=1 SV=1;>tr|Q4TT34|Q4TT34_HUMAN Nucleoside diphos	0.76259	2	NaN	NaN	NaN	NaN		NaN		NaN		0	#NUM!
Q05209-2;Q05209-3;Q05209	Tyrosine-protein phosphatase non-receptor type 12	PTPN12	>sp|Q05209-2|PTN12_HUMAN Isoform 2 of Tyrosine-protein phosphatase non-receptor type 12 OS=Homo sapiens GN=PTPN12;>sp|Q05209-3|PTN12_HUMAN Isoform 3 of Tyrosine-protein phosphatase non-receptor type 12 OS=Homo sapiens GN=PTPN12;>sp|Q05209|PTN12_HUMAN Tyros	0.76435	3	NaN	NaN	NaN	NaN		NaN		NaN		0	#NUM!
Q9NR56-3;Q9NR56-4;Q9NR56-7;Q9NR56-6;C9JP00;Q9NR56-2;Q9NR56-5;Q9NR56	Muscleblind-like protein 1	MBNL1	>sp|Q9NR56-3|MBNL1_HUMAN Isoform 3 of Muscleblind-like protein 1 OS=Homo sapiens GN=MBNL1;>sp|Q9NR56-4|MBNL1_HUMAN Isoform 4 of Muscleblind-like protein 1 OS=Homo sapiens GN=MBNL1;>sp|Q9NR56-7|MBNL1_HUMAN Isoform 7 of Muscleblind-like protein 1 OS=Homo sap	0.76438	3	0.95045	NaN	NaN	1.05213		NaN		NaN		0	1.05213
K7EJ35;O43760;A0A024R8T9;Q3KQZ2	Synaptogyrin-2	SYNGR2	>tr|K7EJ35|K7EJ35_HUMAN Synaptogyrin 2, isoform CRA_a OS=Homo sapiens GN=SYNGR2 PE=1 SV=1;>sp|O43760|SNG2_HUMAN Synaptogyrin-2 OS=Homo sapiens GN=SYNGR2 PE=1 SV=1;>tr|A0A024R8T9|A0A024R8T9_HUMAN Synaptogyrin OS=Homo sapiens GN=SYNGR2 PE=3 SV=1;>tr|Q3KQZ2|Q	0.76484	3	0.76848	NaN	NaN	1.30127		NaN		NaN		0	1.30127
Q9BVC3;A0A024R9J7	Sister chromatid cohesion protein DCC1	DSCC1	>sp|Q9BVC3|DCC1_HUMAN Sister chromatid cohesion protein DCC1 OS=Homo sapiens GN=DSCC1 PE=1 SV=2;>tr|A0A024R9J7|A0A024R9J7_HUMAN Defective in sister chromatid cohesion homolog 1 (S. cerevisiae), isoform CRA_a OS=Homo sapiens GN=DCC1 PE=4 SV=1	0.76565	2	NaN	NaN	NaN	NaN		NaN		NaN		0	#NUM!
Q9H2J9;I3L4Z9		SCPEP1	>tr|Q9H2J9|Q9H2J9_HUMAN DC39 OS=Homo sapiens PE=2 SV=1;>tr|I3L4Z9|I3L4Z9_HUMAN Retinoid-inducible serine carboxypeptidase (Fragment) OS=Homo sapiens GN=SCPEP1 PE=1 SV=1	0.76599	2	NaN	NaN	NaN	NaN		NaN		NaN		0	#NUM!
Q5JVF3-3;Q5JVF3;A8K097;Q5JVF3-4;A0A024RE04;Q5JVF3-2;A0A024RDZ9	PCI domain-containing protein 2	PCID2	>sp|Q5JVF3-3|PCID2_HUMAN Isoform 3 of PCI domain-containing protein 2 OS=Homo sapiens GN=PCID2;>sp|Q5JVF3|PCID2_HUMAN PCI domain-containing protein 2 OS=Homo sapiens GN=PCID2 PE=1 SV=2;>tr|A8K097|A8K097_HUMAN cDNA FLJ78373, highly similar to Homo sapiens P	0.76744	3	1.0254	0.81612	NaN	0.975229		1.22531		NaN		0	1.10027
Q9BZQ0;B4DTZ8;Q12841-2;Q12841	Follistatin-related protein 1	FSTL1	>tr|Q9BZQ0|Q9BZQ0_HUMAN Follistatin-related protein (Fragment) OS=Homo sapiens PE=2 SV=1;>tr|B4DTZ8|B4DTZ8_HUMAN cDNA FLJ52277, highly similar to Follistatin-related protein 1 OS=Homo sapiens PE=2 SV=1;>sp|Q12841-2|FSTL1_HUMAN Isoform 2 of Follistatin-rela	0.77213	2	NaN	NaN	NaN	NaN		NaN		NaN		0	#NUM!
P50750;B5BU53;B2R9L6;A0A024R880;P50750-2;X6RE90	Cyclin-dependent kinase 9	CDK9	>sp|P50750|CDK9_HUMAN Cyclin-dependent kinase 9 OS=Homo sapiens GN=CDK9 PE=1 SV=3;>tr|B5BU53|B5BU53_HUMAN Cyclin-dependent kinase 9 OS=Homo sapiens GN=CDK9 PE=2 SV=1;>tr|B2R9L6|B2R9L6_HUMAN cDNA, FLJ94450, highly similar to Homo sapiens cyclin-dependent ki	0.77249	5	NaN	0.86962	0.83288	NaN		1.14993		1.20065		0	1.17529
P20933	N(4)-(beta-N-acetylglucosaminyl)-L-asparaginase;Glycosylasparaginase alpha chain;Glycosylasparaginase beta chain	AGA	>sp|P20933|ASPG_HUMAN N(4)-(beta-N-acetylglucosaminyl)-L-asparaginase OS=Homo sapiens GN=AGA PE=1 SV=2	0.77375	3	0.77375	NaN	NaN	1.29241		NaN		NaN		0	1.29241
Q6PI78	Transmembrane protein 65	TMEM65	>sp|Q6PI78|TMM65_HUMAN Transmembrane protein 65 OS=Homo sapiens GN=TMEM65 PE=1 SV=2	0.77415	2	NaN	NaN	NaN	NaN		NaN		NaN		0	#NUM!
F8W9X7;Q567U6	Coiled-coil domain-containing protein 93	CCDC93	>tr|F8W9X7|F8W9X7_HUMAN Coiled-coil domain-containing protein 93 OS=Homo sapiens GN=CCDC93 PE=1 SV=1;>sp|Q567U6|CCD93_HUMAN Coiled-coil domain-containing protein 93 OS=Homo sapiens GN=CCDC93 PE=1 SV=2	0.77502	3	NaN	NaN	0.76455	NaN		NaN		1.30796		0	1.30796
Q05D32-2;Q05D32;A0A024R5Q8;H0YMB4;H0YNU2;H0YNW9;H0YMH7	CTD small phosphatase-like protein 2	CTDSPL2	>sp|Q05D32-2|CTSL2_HUMAN Isoform 2 of CTD small phosphatase-like protein 2 OS=Homo sapiens GN=CTDSPL2;>sp|Q05D32|CTSL2_HUMAN CTD small phosphatase-like protein 2 OS=Homo sapiens GN=CTDSPL2 PE=1 SV=2;>tr|A0A024R5Q8|A0A024R5Q8_HUMAN CTD (Carboxy-terminal dom	0.77547	5	1.0643	0.9029	0.77547	0.939585		1.10754		1.28954		0	1.10754
A6MUU8		MIF	>tr|A6MUU8|A6MUU8_HUMAN Macrophage migration inhibitory factor OS=Homo sapiens GN=MIF PE=2 SV=1	0.77564	2	NaN	NaN	NaN	NaN		NaN		NaN		0	#NUM!
B3KM90;Q9ULW0;Q643R0;Q96RR5;Q96FC3	Targeting protein for Xklp2	TPX2;HCTP4;HCA90	>tr|B3KM90|B3KM90_HUMAN cDNA FLJ10529 fis, clone NT2RP2000965, highly similar to Targeting protein for Xklp2 OS=Homo sapiens PE=2 SV=1;>sp|Q9ULW0|TPX2_HUMAN Targeting protein for Xklp2 OS=Homo sapiens GN=TPX2 PE=1 SV=2;>tr|Q643R0|Q643R0_HUMAN HCTP4 OS=Homo	0.77694	11	0.76428	0.81721	0.75929	1.30842		1.22368		1.31702		0	1.30842
A8K2H9			>tr|A8K2H9|A8K2H9_HUMAN cDNA FLJ78503, highly similar to Homo sapiens keratin 13 (KRT13), transcript variant 1, mRNA OS=Homo sapiens PE=2 SV=1	0.77799	4	0.77799	0.79106	NaN	1.28536		1.26413		NaN		0	1.27475
Q9NSI6-3;Q9NSI6-2;Q9NSI6;Q5R2U7;H7C409	Bromodomain and WD repeat-containing protein 1	BRWD1;WDR9	>sp|Q9NSI6-3|BRWD1_HUMAN Isoform C of Bromodomain and WD repeat-containing protein 1 OS=Homo sapiens GN=BRWD1;>sp|Q9NSI6-2|BRWD1_HUMAN Isoform B of Bromodomain and WD repeat-containing protein 1 OS=Homo sapiens GN=BRWD1;>sp|Q9NSI6|BRWD1_HUMAN Bromodomain a	0.7786	2	NaN	NaN	0.7786	NaN		NaN		1.28436		0	1.28436
E9PEZ7;Q9NYB9-2;E7EW77;E7EP65;Q9NYB9-4;Q9NYB9;J3KNB2;Q53RS4;B7Z836;Q9NYB9-3;E7EUA1;B7Z9N5;F8WAU3;F8WCD7;F8WAZ8;F8WBL5;F8WAQ3;F8WEB9;B4DG63;B7Z9E9;B7ZAM8;B4DSH8;B4DMM5;H0Y6B5;Q13802;F8WAL6;B4DKX2;Q53SH3;B7Z617;B7Z5L1;Q8IZP0-11;B7Z612;Q8IZP0-10;B6VEX5;Q8IZP0-8;B6VEX4;F5H1G9;Q8IZP0-7;B6VEX3;F8WA55;Q8IZP0-2;Q8IZP0-4;Q8IZP0-3;Q8IZP0-5;Q59G41;Q8IZP0-6;Q8IZP0-9;F8WA56;Q8IZP0-12;Q8IZP0;A6NFN2	Abl interactor 2	ABI2;ABI-2	>tr|E9PEZ7|E9PEZ7_HUMAN Abl interactor 2 OS=Homo sapiens GN=ABI2 PE=1 SV=1;>sp|Q9NYB9-2|ABI2_HUMAN Isoform 2 of Abl interactor 2 OS=Homo sapiens GN=ABI2;>tr|E7EW77|E7EW77_HUMAN Abl interactor 2 OS=Homo sapiens GN=ABI2 PE=1 SV=1;>tr|E7EP65|E7EP65_HUMAN Abl	0.77885	5	0.81858	0.79475	NaN	1.22163		1.25826		NaN		0	1.23994
O95197-7;B7Z3E3;O95197-2;O95197;B7Z8W8;O95197-3;A0A024R5C4;O95197-4;Q7RTN4;B7Z4M1;F5H891;F5GWG7;F5H617;B7Z361;O95197-6;O95197-5	Reticulon-3	RTN3	>sp|O95197-7|RTN3_HUMAN Isoform 7 of Reticulon-3 OS=Homo sapiens GN=RTN3;>tr|B7Z3E3|B7Z3E3_HUMAN Reticulon OS=Homo sapiens PE=2 SV=1;>sp|O95197-2|RTN3_HUMAN Isoform 2 of Reticulon-3 OS=Homo sapiens GN=RTN3;>sp|O95197|RTN3_HUMAN Reticulon-3 OS=Homo sapiens	0.77919	15	0.80288	0.80645	0.77147	1.24552		1.24		1.29623		0	1.24552
H7C1J2;Q9H147;F2Z2A4;H0Y501;H7C1M5	Deoxynucleotidyltransferase terminal-interacting protein 1	DNTTIP1	>tr|H7C1J2|H7C1J2_HUMAN Deoxynucleotidyltransferase terminal-interacting protein 1 (Fragment) OS=Homo sapiens GN=DNTTIP1 PE=1 SV=1;>sp|Q9H147|TDIF1_HUMAN Deoxynucleotidyltransferase terminal-interacting protein 1 OS=Homo sapiens GN=DNTTIP1 PE=1 SV=2;>tr|F2	0.77924	4	0.99052	NaN	NaN	1.00957		NaN		NaN		0	1.00957
Q9NXV2;H3BSS5	BTB/POZ domain-containing protein KCTD5	KCTD5	>sp|Q9NXV2|KCTD5_HUMAN BTB/POZ domain-containing protein KCTD5 OS=Homo sapiens GN=KCTD5 PE=1 SV=1;>tr|H3BSS5|H3BSS5_HUMAN BTB/POZ domain-containing protein KCTD5 OS=Homo sapiens GN=KCTD5 PE=1 SV=1	0.77983	4	NaN	0.78227	NaN	NaN		1.27833		NaN		0	1.27833
Q8TD30;A0A024R6R2;H3BU54;Q8TD30-2;B3KR40	Alanine aminotransferase 2	GPT2	>sp|Q8TD30|ALAT2_HUMAN Alanine aminotransferase 2 OS=Homo sapiens GN=GPT2 PE=1 SV=1;>tr|A0A024R6R2|A0A024R6R2_HUMAN Glutamic pyruvate transaminase (Alanine aminotransferase) 2, isoform CRA_b OS=Homo sapiens GN=GPT2 PE=4 SV=1;>tr|H3BU54|H3BU54_HUMAN Alanine	0.78044	3	0.81125	NaN	0.80324	1.23267		NaN		1.24496		0	1.23881
O95182;Q6IB89;Q6FG42;Q32Q14	NADH dehydrogenase [ubiquinone] 1 alpha subcomplex subunit 7	NDUFA7	>sp|O95182|NDUA7_HUMAN NADH dehydrogenase [ubiquinone] 1 alpha subcomplex subunit 7 OS=Homo sapiens GN=NDUFA7 PE=1 SV=3;>tr|Q6IB89|Q6IB89_HUMAN NDUFA7 protein OS=Homo sapiens GN=NDUFA7 PE=2 SV=1;>tr|Q6FG42|Q6FG42_HUMAN NDUFA7 protein (Fragment) OS=Homo sap	0.78069	7	0.76262	0.78385	NaN	1.31127		1.27575		NaN		0	1.29351
Q9H0L4	Cleavage stimulation factor subunit 2 tau variant	CSTF2T	>sp|Q9H0L4|CSTFT_HUMAN Cleavage stimulation factor subunit 2 tau variant OS=Homo sapiens GN=CSTF2T PE=1 SV=1	0.78111	5	0.77956	NaN	NaN	1.28277		NaN		NaN		0	1.28277
Q9BVG9;A0A024RC97;E9PS47;E9PLE4	Phosphatidylserine synthase 2	PTDSS2	>sp|Q9BVG9|PTSS2_HUMAN Phosphatidylserine synthase 2 OS=Homo sapiens GN=PTDSS2 PE=1 SV=1;>tr|A0A024RC97|A0A024RC97_HUMAN Phosphatidylserine synthase 2, isoform CRA_a OS=Homo sapiens GN=PTDSS2 PE=4 SV=1	0.78123	5	0.96532	1.0966	1.171	1.03593		0.91191		0.853971		0	0.91191
Q6ZRP7	Sulfhydryl oxidase 2	QSOX2	>sp|Q6ZRP7|QSOX2_HUMAN Sulfhydryl oxidase 2 OS=Homo sapiens GN=QSOX2 PE=1 SV=3	0.78126	4	0.80563	0.98324	NaN	1.24126		1.01705		NaN		0	1.12916
B1B5S6;B1B5T7;B1B5T0;B1B5R8;B1B5P6;B1B5S8;B1B5Q9;B1B5Q8;B1B5Q3;B1B5Q0;E7ERV9;B3KUZ6;E7EMM4;Q53H01;Q13510;A8K0B6;Q13510-2;D3DSQ1	Acid ceramidase;Acid ceramidase subunit alpha;Acid ceramidase subunit beta	ASAH1	>tr|B1B5S6|B1B5S6_HUMAN N-acylsphingosine amidohydrolase 1 (Fragment) OS=Homo sapiens GN=ASAH1 PE=4 SV=1;>tr|B1B5T7|B1B5T7_HUMAN N-acylsphingosine amidohydrolase 1 (Fragment) OS=Homo sapiens GN=ASAH1 PE=4 SV=1;>tr|B1B5T0|B1B5T0_HUMAN N-acylsphingosine amid	0.78249	2	NaN	NaN	NaN	NaN		NaN		NaN		0	#NUM!
Q9Y4D8-4;Q9Y4D8;J3KPF0;F8VWT9;Q9Y4D8-2	Probable E3 ubiquitin-protein ligase HECTD4	HECTD4	>sp|Q9Y4D8-4|HECD4_HUMAN Isoform 4 of Probable E3 ubiquitin-protein ligase HECTD4 OS=Homo sapiens GN=HECTD4;>sp|Q9Y4D8|HECD4_HUMAN Probable E3 ubiquitin-protein ligase HECTD4 OS=Homo sapiens GN=HECTD4 PE=1 SV=5;>tr|J3KPF0|J3KPF0_HUMAN Probable E3 ubiquitin	0.78274	5	NaN	0.78274	NaN	NaN		1.27756		NaN		0	1.27756
Q92974-3;Q92974-2;Q92974;Q5VY93;D3DVA5;V9GYM8;B4DJ49;B7Z977;V9GYF0;V9GZ58;V9GYF5;V9GYG5;V9GZ14	Rho guanine nucleotide exchange factor 2	ARHGEF2	>sp|Q92974-3|ARHG2_HUMAN Isoform 3 of Rho guanine nucleotide exchange factor 2 OS=Homo sapiens GN=ARHGEF2;>sp|Q92974-2|ARHG2_HUMAN Isoform 2 of Rho guanine nucleotide exchange factor 2 OS=Homo sapiens GN=ARHGEF2;>sp|Q92974|ARHG2_HUMAN Rho guanine nucleotid	0.78275	10	0.77931	0.77249	0.76193	1.28319		1.29452		1.31246		0	1.29452
Q15058	Kinesin-like protein KIF14	KIF14	>sp|Q15058|KIF14_HUMAN Kinesin-like protein KIF14 OS=Homo sapiens GN=KIF14 PE=1 SV=1	0.78326	2	NaN	NaN	NaN	NaN		NaN		NaN		0	#NUM!
Q96RS0;B2RBJ7;B3KNW9	Trimethylguanosine synthase	TGS1	>sp|Q96RS0|TGS1_HUMAN Trimethylguanosine synthase OS=Homo sapiens GN=TGS1 PE=1 SV=3;>tr|B2RBJ7|B2RBJ7_HUMAN cDNA, FLJ95547, highly similar to Homo sapiens nuclear receptor coactivator 6 interacting protein (NCOA6IP), mRNA OS=Homo sapiens PE=2 SV=1	0.78436	3	0.99657	0.89124	NaN	1.00344		1.12203		NaN		0	1.06274
B7Z7F2;F5H827;B7ZAT4;B7Z7Q4;Q8WZA1;Q8WZA1-2	Protein O-linked-mannose beta-1,2-N-acetylglucosaminyltransferase 1	POMGNT1	>tr|B7Z7F2|B7Z7F2_HUMAN cDNA FLJ53518, highly similar to Protein O-linked-mannosebeta-1,2-N-acetylglucosaminyltransferase 1 (EC 2.4.1.-) OS=Homo sapiens PE=2 SV=1;>tr|F5H827|F5H827_HUMAN Protein O-linked-mannose beta-1,2-N-acetylglucosaminyltransferase 1 O	0.78488	3	0.75319	NaN	NaN	1.32769		NaN		NaN		0	1.32769
Q6ZN96;C9IZY8;Q96PY5;Q96PY5-3;B3KT32;B3KXD8	Formin-like protein 2	FMNL2	>tr|Q6ZN96|Q6ZN96_HUMAN cDNA FLJ16308 fis, clone PUAEN2006335 OS=Homo sapiens PE=2 SV=1;>tr|C9IZY8|C9IZY8_HUMAN Formin-like protein 2 OS=Homo sapiens GN=FMNL2 PE=1 SV=1;>sp|Q96PY5|FMNL2_HUMAN Formin-like protein 2 OS=Homo sapiens GN=FMNL2 PE=1 SV=3;>sp|Q96	0.78513	3	0.82949	NaN	NaN	1.20556		NaN		NaN		0	1.20556
Q9Y6M7-11;Q9Y6M7-14;Q9Y6M7-10;Q9Y6M7-4;Q9Y6M7-3;C9JRP1;Q9Y6M7-2;Q9Y6M7-9;Q9Y6M7-6;Q9Y6M7-13;Q9Y6M7-12;E9PFN4;B5M450;Q9Y6M7;Q9Y6M7-8;Q9Y6M7-7	Sodium bicarbonate cotransporter 3	SLC4A7	>sp|Q9Y6M7-11|S4A7_HUMAN Isoform 11 of Sodium bicarbonate cotransporter 3 OS=Homo sapiens GN=SLC4A7;>sp|Q9Y6M7-14|S4A7_HUMAN Isoform 14 of Sodium bicarbonate cotransporter 3 OS=Homo sapiens GN=SLC4A7;>sp|Q9Y6M7-10|S4A7_HUMAN Isoform 10 of Sodium bicarbonat	0.78517	3	0.83698	NaN	NaN	1.19477		NaN		NaN		0	1.19477
Q3LIB2;H0YM15;J3KNL7;Q8NBR6-2;Q8NBR6;B4DM49	Protein FAM63B	Nbla00402;FAM63B	>tr|Q3LIB2|Q3LIB2_HUMAN Putative uncharacterized protein Nbla00402 OS=Homo sapiens GN=Nbla00402 PE=2 SV=1;>tr|H0YM15|H0YM15_HUMAN Family with sequence similarity 63, member B, isoform CRA_e OS=Homo sapiens GN=FAM63B PE=1 SV=1;>tr|J3KNL7|J3KNL7_HUMAN Family	0.78566	3	NaN	NaN	NaN	NaN		NaN		NaN		0	#NUM!
B3KUV2;Q9H9U4;Q96FY7;Q4G0E8;Q68CU9;E7EWU3;H0UIA1;Q6DKJ3;Q9NR19;Q9NR19-2	Acetyl-coenzyme A synthetase, cytoplasmic	ACSS2;DKFZp762G026	>tr|B3KUV2|B3KUV2_HUMAN cDNA FLJ40707 fis, clone THYMU2026835, highly similar to Acetyl-coenzyme A synthetase, cytoplasmic (EC 6.2.1.1) OS=Homo sapiens PE=2 SV=1;>tr|Q9H9U4|Q9H9U4_HUMAN cDNA FLJ12546 fis, clone NT2RM4000616, moderately similar to ACETYL-CO	0.78566	2	NaN	NaN	NaN	NaN		NaN		NaN		0	#NUM!
Q9H5X1-2;H0YKV4;Q9H5X1;H0YLH6	MIP18 family protein FAM96A	FAM96A	>sp|Q9H5X1-2|FA96A_HUMAN Isoform 2 of MIP18 family protein FAM96A OS=Homo sapiens GN=FAM96A;>tr|H0YKV4|H0YKV4_HUMAN Family with sequence similarity 96, member A, isoform CRA_a OS=Homo sapiens GN=FAM96A PE=1 SV=1;>sp|Q9H5X1|FA96A_HUMAN MIP18 family protein	0.78607	2	NaN	0.78607	NaN	NaN		1.27215		NaN		0	1.27215
B4DL79;O95235;D6RBN1;D6R9E4	Kinesin-like protein KIF20A	KIF20A	>tr|B4DL79|B4DL79_HUMAN Kinesin-like protein KIF20A OS=Homo sapiens GN=KIF20A PE=1 SV=1;>sp|O95235|KI20A_HUMAN Kinesin-like protein KIF20A OS=Homo sapiens GN=KIF20A PE=1 SV=1	0.78692	7	0.84647	0.77076	NaN	1.18138		1.29742		NaN		0	1.2394
Q53G89;Q14222	Elongation factor 1-alpha		>tr|Q53G89|Q53G89_HUMAN Elongation factor 1-alpha (Fragment) OS=Homo sapiens PE=2 SV=1	0.78738	2	NaN	NaN	NaN	NaN		NaN		NaN		0	#NUM!
Q6IT96;Q13547;B5BU61;Q5TEE2;F5GXM1;B4DRG0;Q5HYD4	Histone deacetylase;Histone deacetylase 1	HDAC1	>tr|Q6IT96|Q6IT96_HUMAN Histone deacetylase OS=Homo sapiens GN=HDAC1 PE=1 SV=1;>sp|Q13547|HDAC1_HUMAN Histone deacetylase 1 OS=Homo sapiens GN=HDAC1 PE=1 SV=1;>tr|B5BU61|B5BU61_HUMAN Histone deacetylase OS=Homo sapiens GN=HDAC1 PE=2 SV=1;>tr|Q5TEE2|Q5TEE2_	0.78777	3	0.78151	NaN	0.78824	1.27957		NaN		1.26865		0	1.27411
Q9NW97;A0A024QZ97	Transmembrane protein 51	TMEM51	>sp|Q9NW97|TMM51_HUMAN Transmembrane protein 51 OS=Homo sapiens GN=TMEM51 PE=1 SV=1;>tr|A0A024QZ97|A0A024QZ97_HUMAN Transmembrane protein 51, isoform CRA_b OS=Homo sapiens GN=TMEM51 PE=4 SV=1	0.78833	2	NaN	NaN	NaN	NaN		NaN		NaN		0	#NUM!
Q5T3J3	Ligand-dependent nuclear receptor-interacting factor 1	LRIF1	>sp|Q5T3J3|LRIF1_HUMAN Ligand-dependent nuclear receptor-interacting factor 1 OS=Homo sapiens GN=LRIF1 PE=1 SV=1	0.78874	3	NaN	NaN	NaN	NaN		NaN		NaN		0	#NUM!
H3BUU5;P08047-3;P08047	Transcription factor Sp1	SP1	>tr|H3BUU5|H3BUU5_HUMAN Transcription factor Sp1 (Fragment) OS=Homo sapiens GN=SP1 PE=1 SV=1;>sp|P08047-3|SP1_HUMAN Isoform 3 of Transcription factor Sp1 OS=Homo sapiens GN=SP1;>sp|P08047|SP1_HUMAN Transcription factor Sp1 OS=Homo sapiens GN=SP1 PE=1 SV=3	0.78933	8	0.95199	0.76976	0.87248	1.05043		1.29911		1.14616		0	1.14616
Q12789-3;Q6AHZ7;Q12789;Q6AWA4	General transcription factor 3C polypeptide 1	GTF3C1;DKFZp686A111;DKFZp686O0870	>sp|Q12789-3|TF3C1_HUMAN Isoform 2 of General transcription factor 3C polypeptide 1 OS=Homo sapiens GN=GTF3C1;>tr|Q6AHZ7|Q6AHZ7_HUMAN Putative uncharacterized protein DKFZp686A111 OS=Homo sapiens GN=DKFZp686A111 PE=2 SV=1;>sp|Q12789|TF3C1_HUMAN General tra	0.78958	14	0.81236	0.78958	0.80727	1.23098		1.2665		1.23874		0	1.23874
Q14344-2;B4DWV9;Q14344;A0A024R8M0	Guanine nucleotide-binding protein subunit alpha-13	GNA13	>sp|Q14344-2|GNA13_HUMAN Isoform 2 of Guanine nucleotide-binding protein subunit alpha-13 OS=Homo sapiens GN=GNA13;>tr|B4DWV9|B4DWV9_HUMAN cDNA FLJ53108, highly similar to Guanine nucleotide-binding protein alpha-13 subunit OS=Homo sapiens PE=2 SV=1;>sp|Q1	0.7899	3	NaN	NaN	NaN	NaN		NaN		NaN		0	#NUM!
Q96JB5;Q96JB5-4;J3QRM1;Q96JB5-3;Q96JB5-2;J3QL86;J3QS62;J3QQY1	CDK5 regulatory subunit-associated protein 3	CDK5RAP3	>sp|Q96JB5|CK5P3_HUMAN CDK5 regulatory subunit-associated protein 3 OS=Homo sapiens GN=CDK5RAP3 PE=1 SV=2;>sp|Q96JB5-4|CK5P3_HUMAN Isoform 4 of CDK5 regulatory subunit-associated protein 3 OS=Homo sapiens GN=CDK5RAP3;>tr|J3QRM1|J3QRM1_HUMAN CDK5 regulatory	0.78996	4	0.91574	NaN	0.78996	1.09201		NaN		1.26589		0	1.17895
P53701;A0A024RBY9;Q68D50	Cytochrome c-type heme lyase	HCCS;DKFZp779I1858	>sp|P53701|CCHL_HUMAN Cytochrome c-type heme lyase OS=Homo sapiens GN=HCCS PE=1 SV=1;>tr|A0A024RBY9|A0A024RBY9_HUMAN Holocytochrome c synthase (Cytochrome c heme-lyase), isoform CRA_a OS=Homo sapiens GN=HCCS PE=4 SV=1;>tr|Q68D50|Q68D50_HUMAN Putative uncha	0.79079	10	0.78553	0.8	0.8031	1.27303		1.25		1.24517		0	1.25
Q9P2N6-8;F8W894;B4E1W4;E7EU88;B4DYX5;Q9P2N6-6;Q9P2N6-2;Q9P2N6-5;Q9P2N6-4;B2RAV0;Q9P2N6-3;Q9P2N6	KAT8 regulatory NSL complex subunit 3	KANSL3	>sp|Q9P2N6-8|KANL3_HUMAN Isoform 8 of KAT8 regulatory NSL complex subunit 3 OS=Homo sapiens GN=KANSL3;>tr|F8W894|F8W894_HUMAN KAT8 regulatory NSL complex subunit 3 OS=Homo sapiens GN=KANSL3 PE=1 SV=1;>tr|B4E1W4|B4E1W4_HUMAN cDNA FLJ55383 OS=Homo sapiens PE	0.79096	4	0.75309	NaN	NaN	1.32786		NaN		NaN		0	1.32786
P51610;P51610-2;P51610-4;A6NEM2;H7C1C4;P51610-3;Q05C05	Host cell factor 1;HCF N-terminal chain 1;HCF N-terminal chain 2;HCF N-terminal chain 3;HCF N-terminal chain 4;HCF N-terminal chain 5;HCF N-terminal chain 6;HCF C-terminal chain 1;HCF C-terminal chain 2;HCF C-terminal chain 3;HCF C-terminal chain 4;HCF C-terminal chain 5;HCF C-terminal chain 6	HCFC1	>sp|P51610|HCFC1_HUMAN Host cell factor 1 OS=Homo sapiens GN=HCFC1 PE=1 SV=2;>sp|P51610-2|HCFC1_HUMAN Isoform 2 of Host cell factor 1 OS=Homo sapiens GN=HCFC1;>sp|P51610-4|HCFC1_HUMAN Isoform 4 of Host cell factor 1 OS=Homo sapiens GN=HCFC1;>tr|A6NEM2|A6NE	0.79139	22	0.79893	0.77036	0.79092	1.25167		1.29809		1.26435		0	1.26435
B4E127;Q05CX8;G8JL98;Q13569;B2R848;H0YH18;B4DI29;F5H0I7	G/T mismatch-specific thymine DNA glycosylase	TDG	>tr|B4E127|B4E127_HUMAN G/T mismatch-specific thymine DNA glycosylase OS=Homo sapiens GN=TDG PE=2 SV=1;>tr|Q05CX8|Q05CX8_HUMAN TDG protein (Fragment) OS=Homo sapiens GN=TDG PE=2 SV=1;>tr|G8JL98|G8JL98_HUMAN G/T mismatch-specific thymine DNA glycosylase OS=	0.79149	2	NaN	NaN	NaN	NaN		NaN		NaN		0	#NUM!
[truncated: 3,626 more rows]
